# Supplementary material for: COVID-19 Infection during Pregnancy: Disruptions in Lipid Metabolism and Implications for Newborn Health
Source: Preprints.org preprint supplement (doi:10.20944/preprints202307.1683.v1), 2023-07-26

# Maternal plasma, control group, positive ion mode

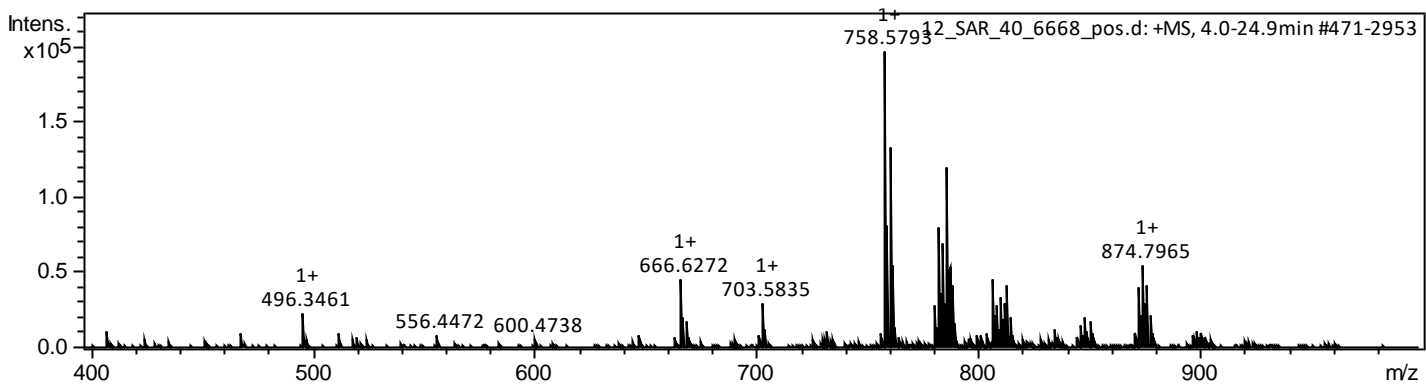

# Maternal plasma, the first trimester infection group, positive ion mode

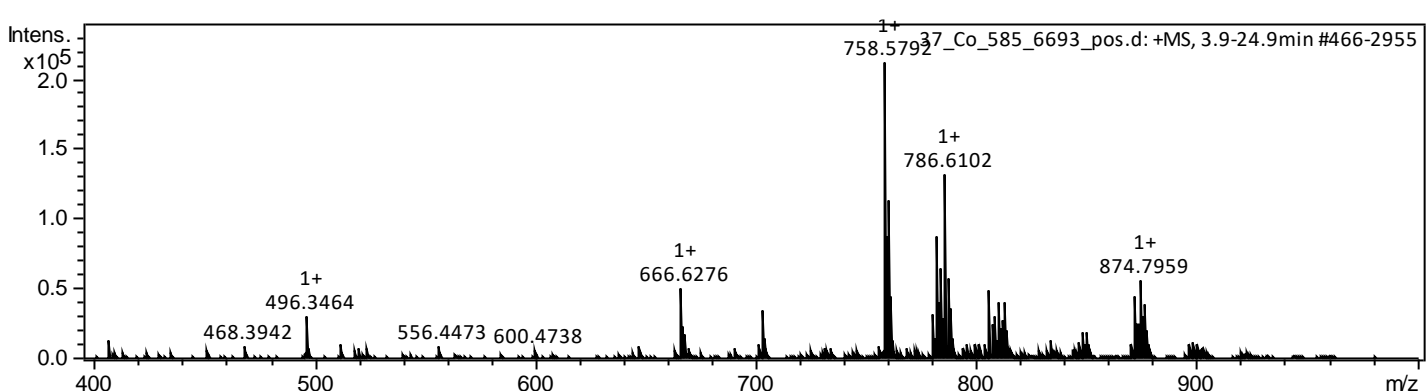

# Maternal plasma, the second trimester infection group, positive ion mode

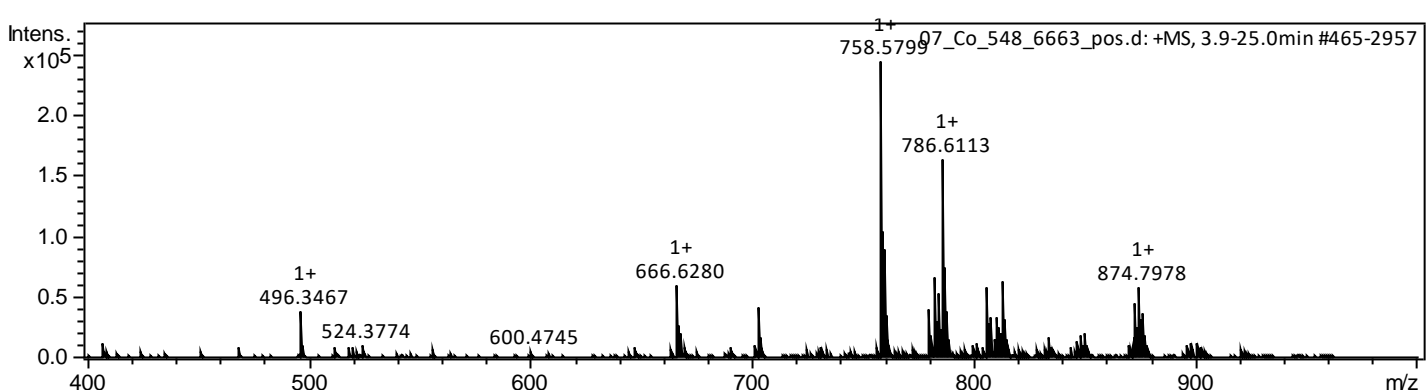

# Maternal plasma, the thrid trimester infection group, positive ion mode

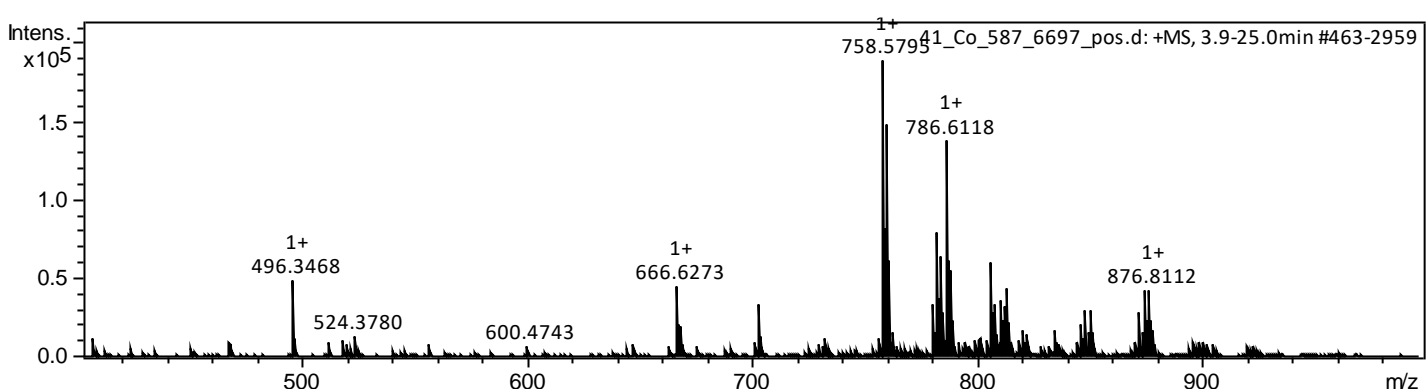

# Amniotic fluid, control group, negative ion mode

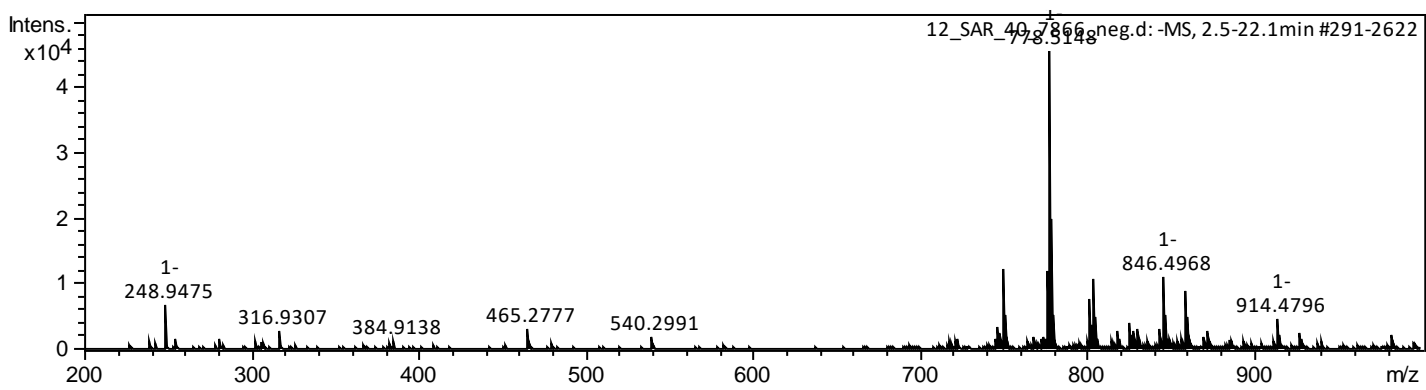

# Amniotic fluid, the first trimester infection group, negative ion mode

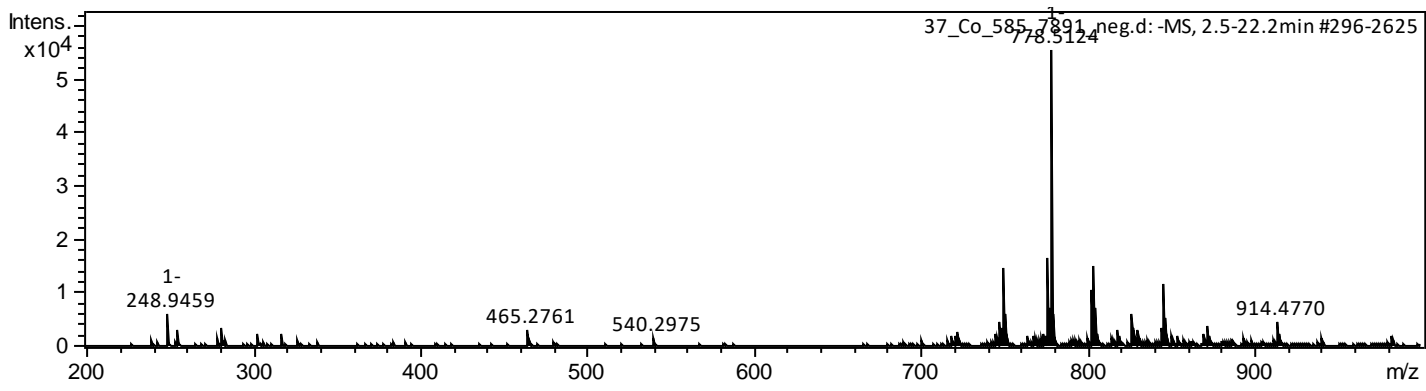

# Amniotic fluid, the second trimester infection group, negative ion mode

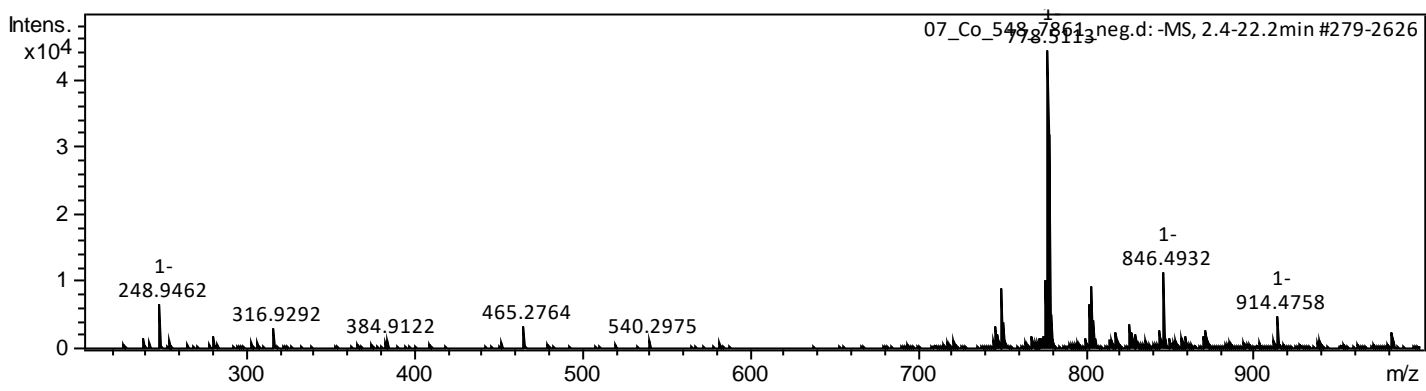

# Amniotic fluid, the third trimester infection group, negative ion mode

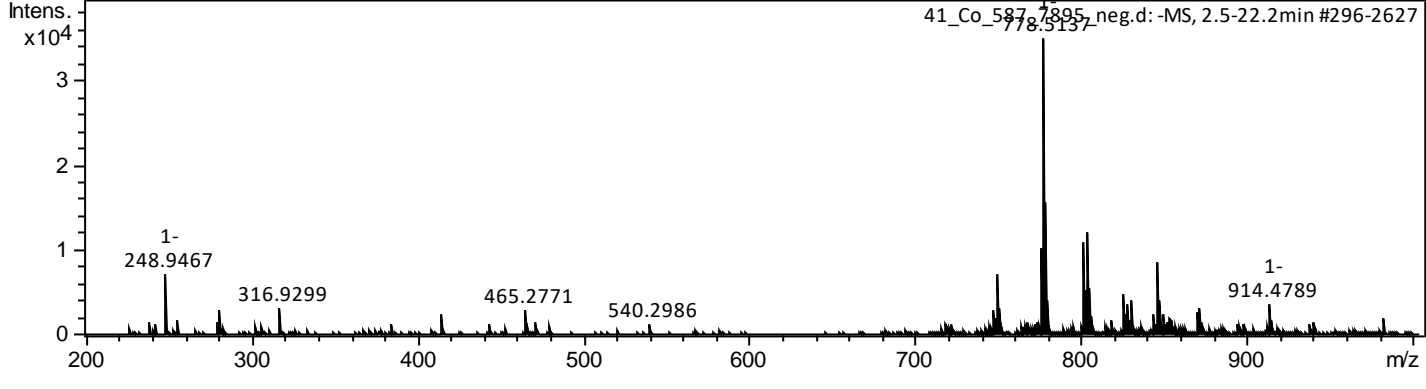

Cord plasma, control group, positive ion mode

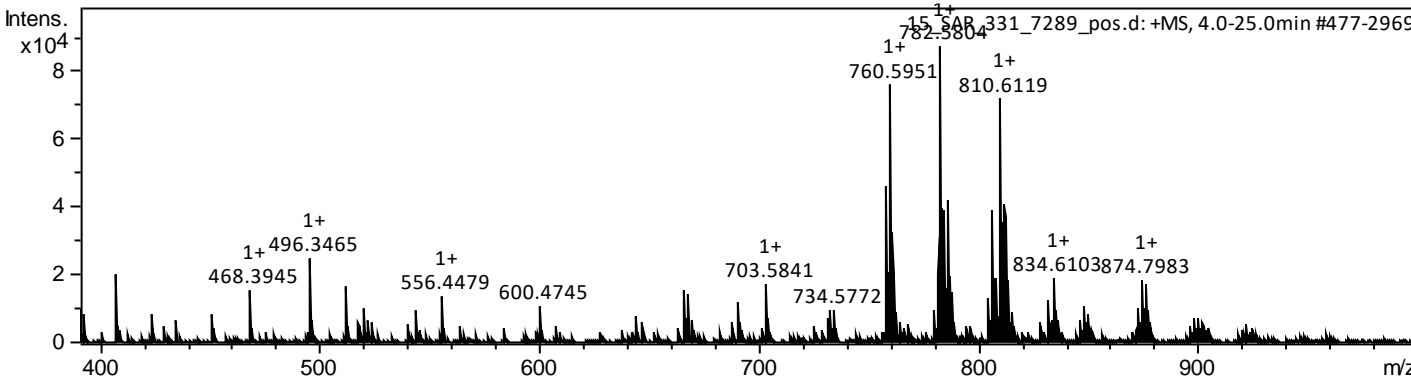

Cord plasma, the first trimester infection group , positive ion mode

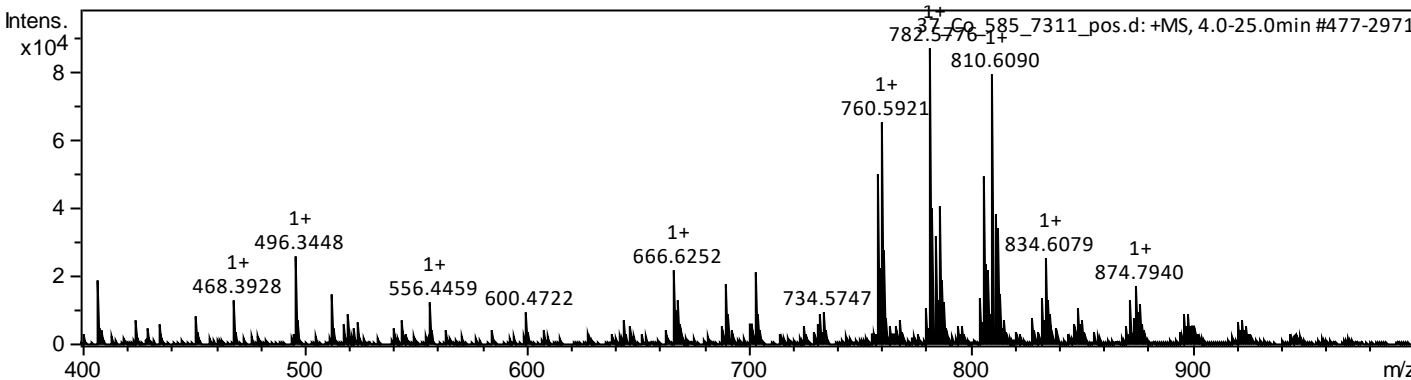

Cord plasma, the second trimester infection group , positive ion mode

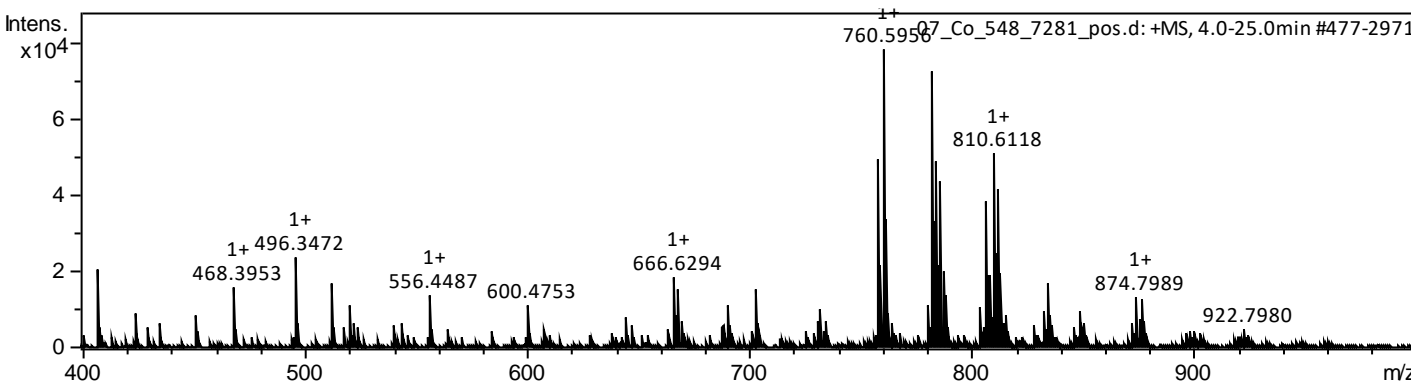

Cord plasma, the third trimester infection group , positive ion mode

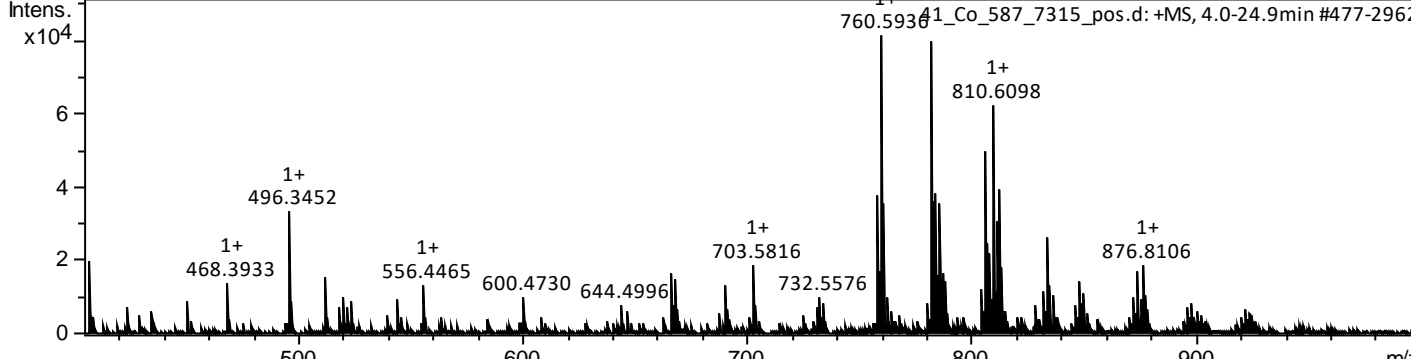

Maternal plasma, control group, negative ion mode

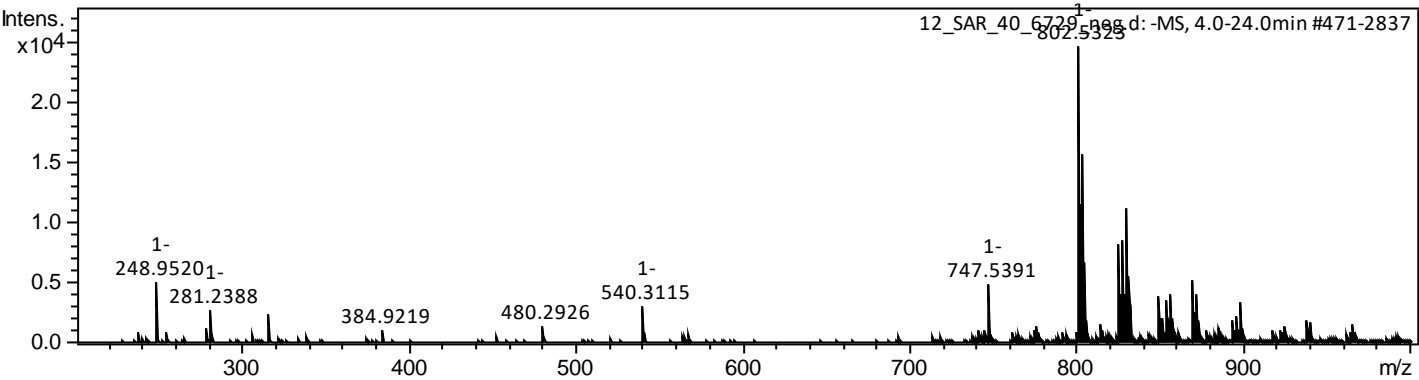

Maternal plasma, the first trimester infection group, negative ion mode

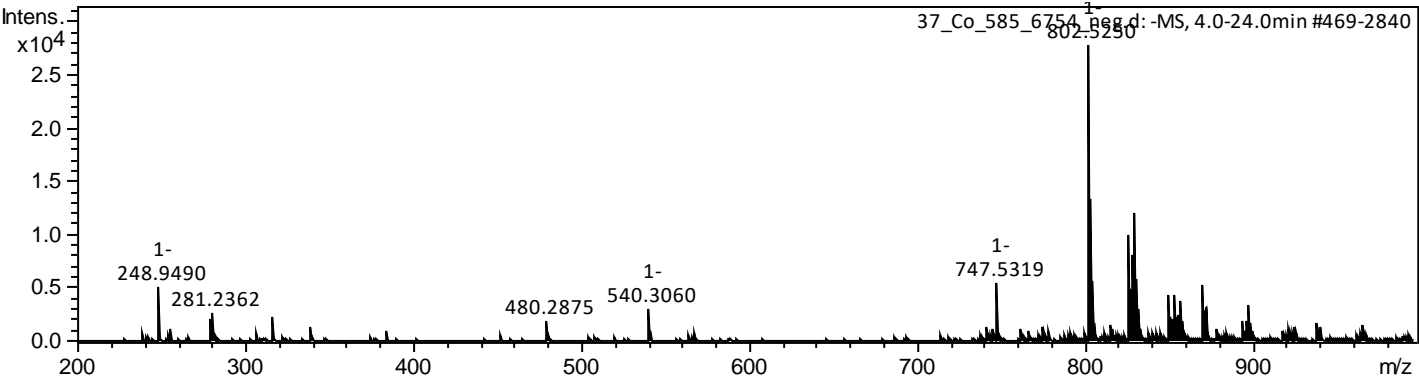

Maternal plasma, the second trimester infection group, negative ion mode

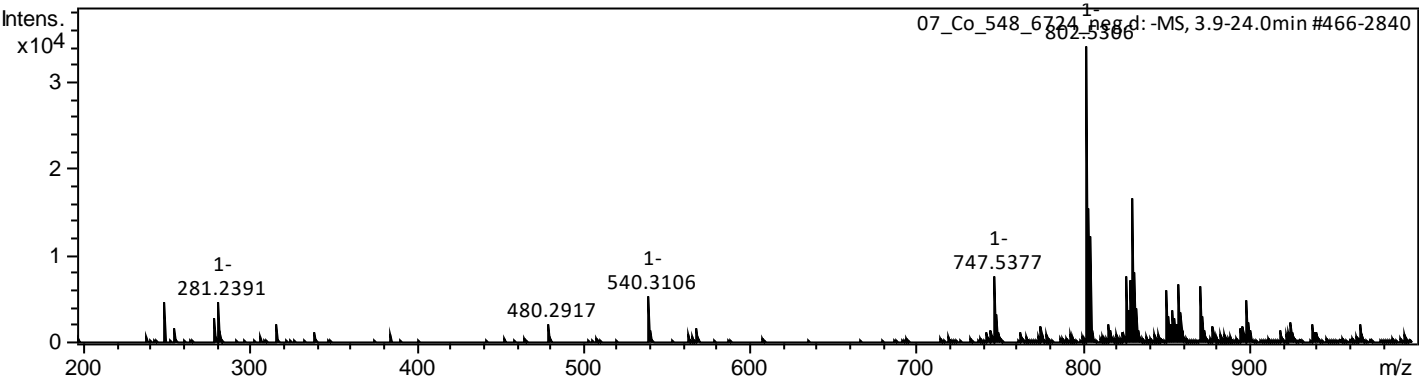

Maternal plasma, the third trimester infection group, negative ion mode

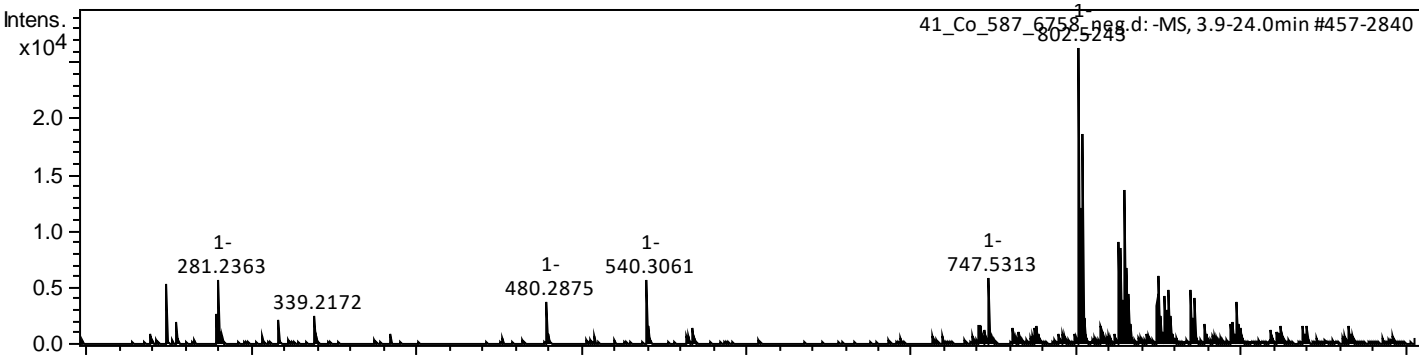

Amniotic fluid, control group, positive ion mode

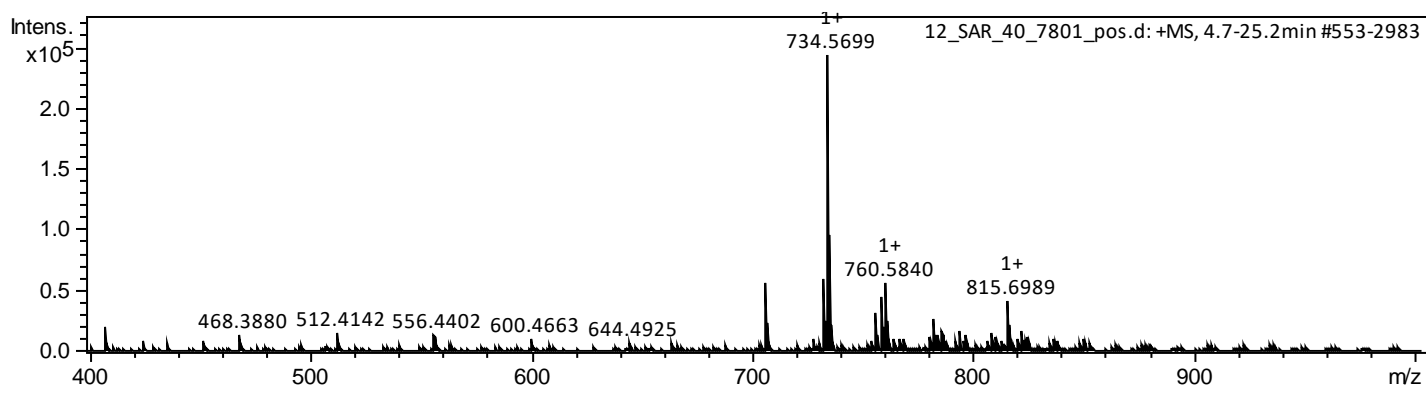

Amniotic fluid, the first trimester infection group, positive ion mode

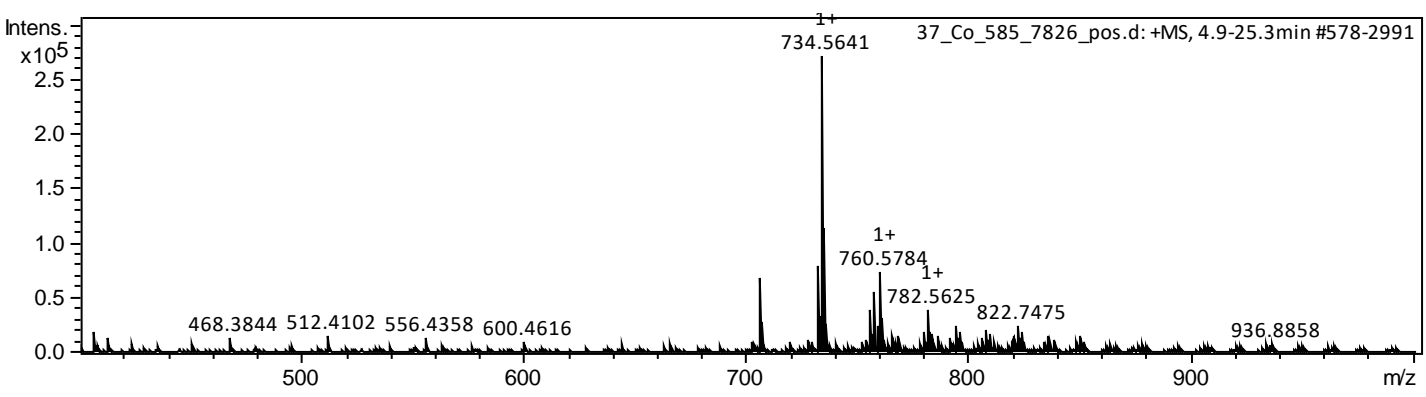

Amniotic fluid, the second trimester infection group, positive ion mode

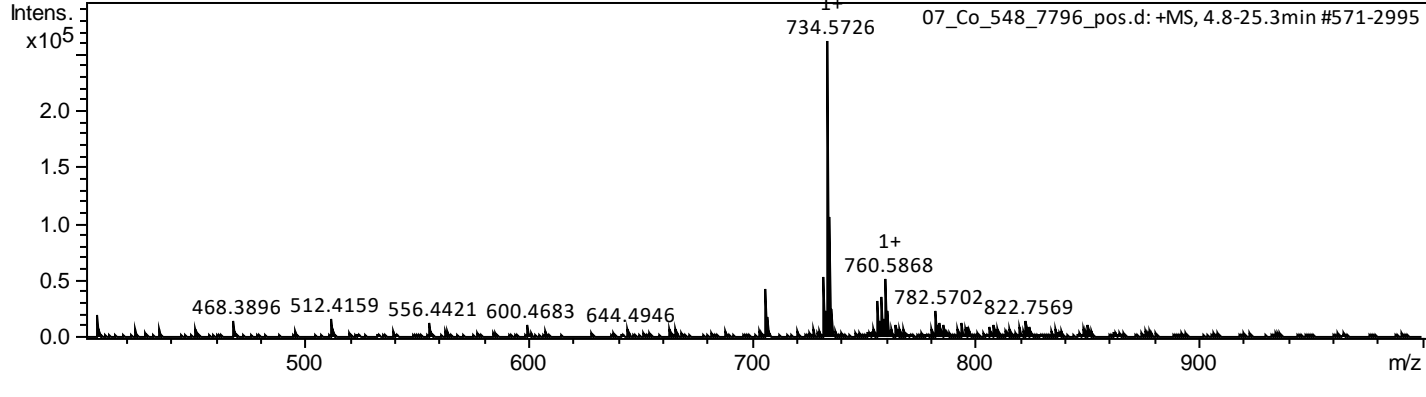

Amniotic fluid, the third trimester infection group, positive ion mode

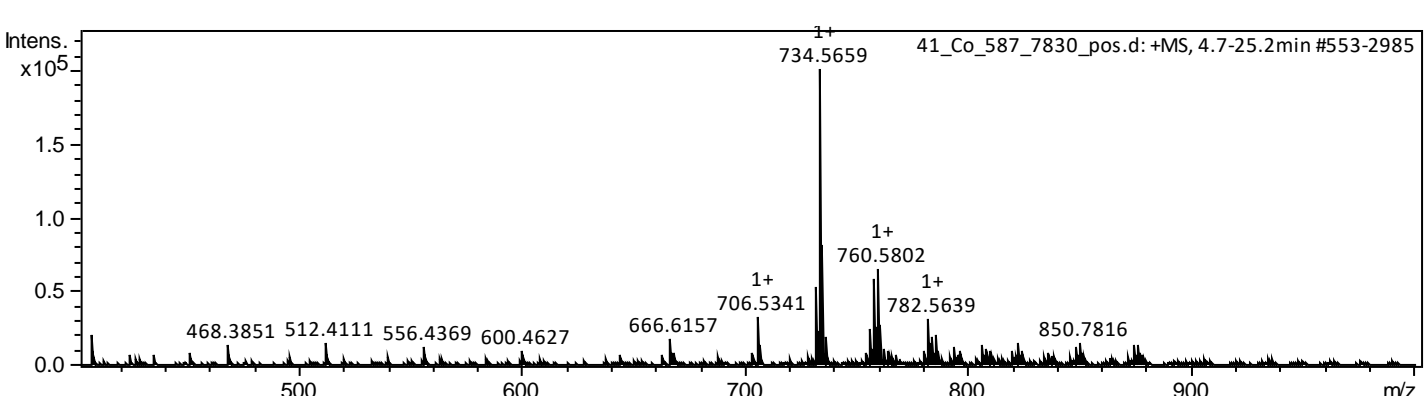

Cord plasma, control group, negative ion mode

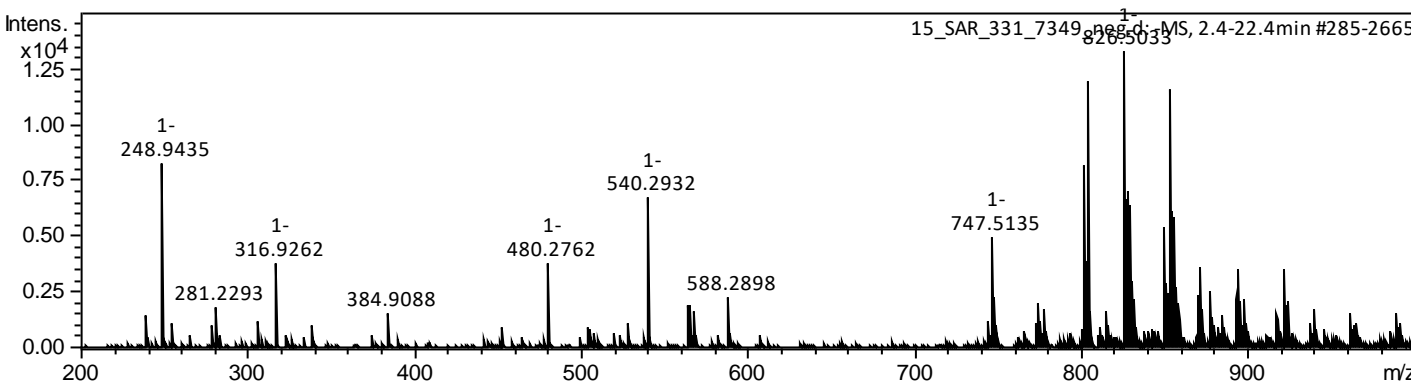

Cord plasma, the first trimester infection group, negative ion mode

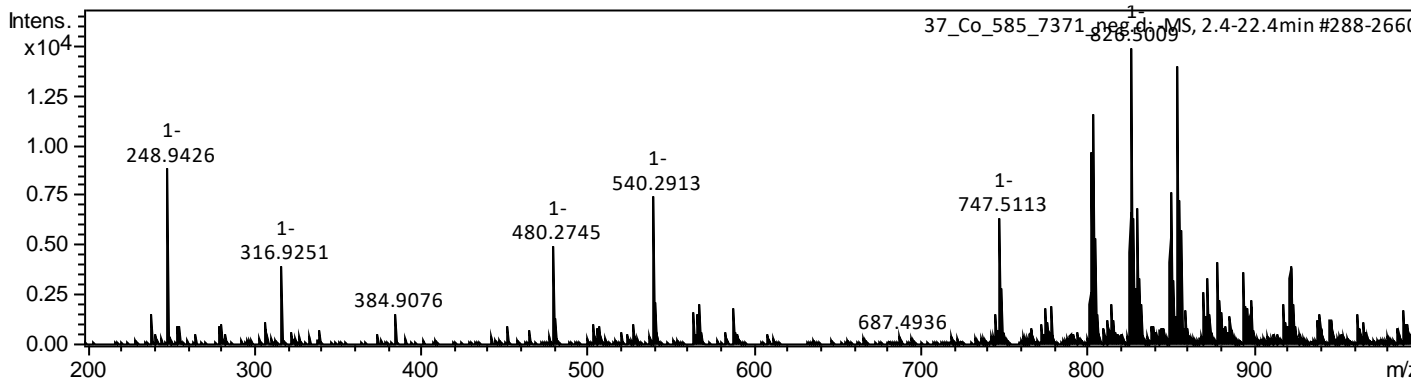

Cord plasma, the second trimester infection group, negative ion mode

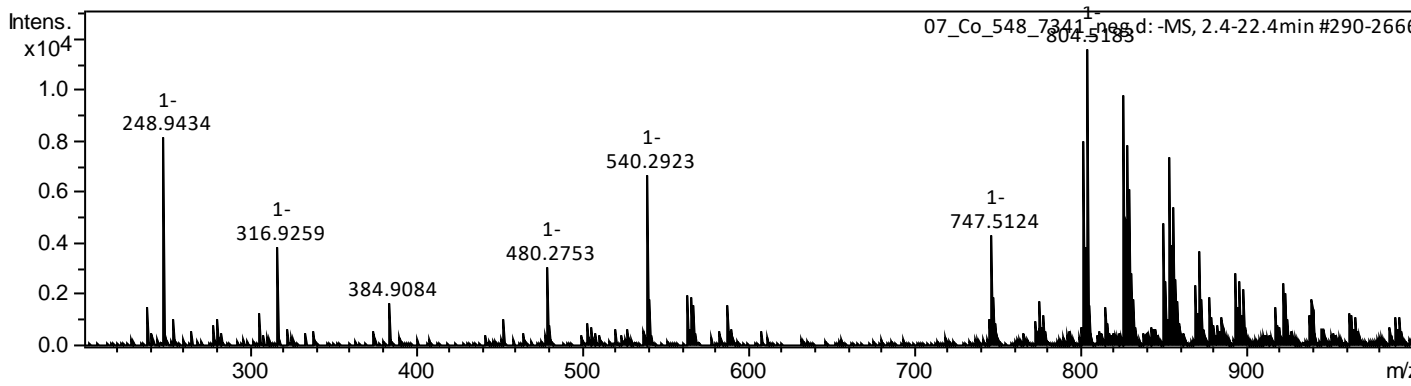

Cord plasma, the third trimester infection group, negative ion mode

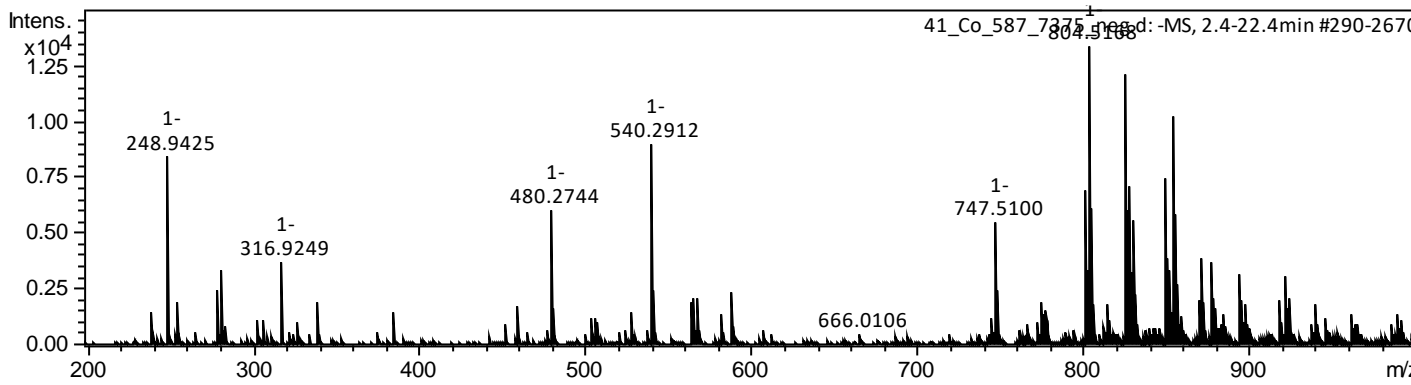

Supplement: Supplementary file 3 [file supplementary]
