# Supplementary material for: COVID-19 Infection during Pregnancy: Disruptions in Lipid Metabolism and Implications for Newborn Health
Source: Preprints.org preprint supplement (doi:10.20944/preprints202307.1683.v1), 2023-07-26
Supplement: Supplementary file 1 [file Supplementary 1.xlsx]

## Sheet: Clinical data
Sample	Age, year	Height, sm	Weight, kg	BMI	COVID-19 infection, 0 - no, 1 - yes	Gestational age at infection	Trimestr of infection	Treatment: 1 - ambulatory, 2- hospital	Аsymptomatic: 0 - no, 1 - yes	Temperature: 0 - no, 1 - yes	Сough, 0 - no, 1 - yes	Anosmia: 0 - no, 1 - yes	Pneumonia: 0 - no, 1 - yes	Pregnancy in the anamnesis	Childbirth in the anamesis	Abortions in anamnesis	Undeveloped pregnancy in anamnesis	Chorion previa in the 1st trimestr	Toxicosis in the 1st trimestr	Anemia in 1st trimestr	Exacerbation of chronic diseases in the 1st trimestr	Hormon support in the 1st trimestr	Risk of miscarriage in the 1st trimestr	Gestational diabetes mellitus in the 1st trimestr	Antibiotic therapy in the 1st trimestr	Isthmic-cervical insufficiency in the 2nd trimestr	Surgical correction in the 2nd trimestr	Obstetric pessary in the 2nd trimestr	Risk of miscarriage or premature birth in the 2nd trimestr	Anemia in the 2nd trimestr	Antibiotic therapy in the 2nd trimestr	Gestational diabetes mellitus in the 2nd trimestr	Risk of premature birth in the 3rd trimestr	Anemia in the 3rd trimestr	Edema during pregnancy in the 3rd trimestr	Antibiotic therapy, in the 3rd trimestr	Gestational diabetes mellitus in the 3rd trimestr	Gestational age at birth	Type of childbirth: 1-natural childbirth, 2 - scheduled caesarean section 3-emergency caesarean section	Child mass	Child lenght	Apgar - 1 min	Apgar - 5 min	Child health: 0 - no, 1 - yes	Аccessory chorda of the ventricle: 0 - no, 1 - yes	Interatrial communication: 0 - no, 1 - yes	Gestational diabetes mellitus: 0 - no, 1 - diet, 2 - insulin
723	42	NA	NA	NA	1	20	2	1	1	0	0	0	0	3	2	0	1	0	1	0	0	1	1	0	0	0	0	0	0	0	0	0	1	0	0	0	0	37.3	3	2590	48	8	9	0	1	0	0
548	33	155	69.5	29	1	NA	2	1	0	1	0	0	0	2	1	0	1	0	0	0	0	1	1	0	0	0	0	0	0	0	0	0	0	0	0	0	0	40.5	1	3750	55	8	9	1	1	1	0
549	34	160	62	24	1	22	2	1	0	1	0	1	0	1	1	0	0	0	0	0	0	0	0	0	0	0	0	0	0	0	0	0	0	1	0	0	0	39.4	1	3020	50	8	9	1	0	0	0
550	29	163	68	26	1	20	2	1	1	0	0	0	0	2	1	0	1	0	0	0	0	1	1	0	0	0	0	0	0	0	0	0	0	0	0	0	1	40.2	1	4222	55	8	8	0	0	0	1
551	25	172	72	24	1	30	3	1	1	0	0	0	0	4	2	1	1	0	1	0	0	0	0	0	0	0	0	0	0	1	0	0	0	0	0	1	0	40	1	3360	54	8	9	0	0	1	0
553	28	163	61	23	1	36	3	1	1	0	0	1	0	3	2	0	1	0	1	0	0	0	0	0	0	0	0	0	1	0	0	0	0	0	0	0	0	40.1	1	3574	52	8	9	1	0	0	0
554	26	164	49	18	1	19	2	1	1	0	0	1	0	1	1	0	0	0	0	0	0	0	0	0	0	0	0	0	0	0	0	0	0	0	0	0	0	39.4	3	3250	52	8	9	1	0	0	0
555	40	170	62.5	22	1	20	2	1	0	0	0	0	1	2	2	0	0	0	1	0	1	0	0	0	0	0	0	0	0	1	1	0	0	0	0	0	0	39.6	1	3046	52	8	9	1	0	0	0
556	31	171	71	24	1	23	2	2	0	1	1	0	1	1	1	0	0	0	0	0	0	1	0	0	0	0	0	0	0	1	1	1	0	1	0	0	1	40.4	1	4090	56	8	8	1	0	0	1
558	27	160	69	27	1	12	1	2	0	1	0	0	0	1	1	0	0	0	0	0	0	1	1	0	0	1	1	0	0	0	1	0	0	0	0	0	0	35.2	3	2310	46	8	8	1	0	0	0
559	27	155	58	24	1	21	2	2	0	1	1	1	1	1	1	0	0	0	0	0	0	0	0	0	0	0	0	0	0	0	1	0	0	0	0	0	0	26	3	397	27	5	7	0	0	0	0
560	27	165	70	26	1	23	2	1	0	1	1	0	0	1	1	0	0	0	1	0	0	0	0	0	0	0	0	0	0	0	1	0	0	0	0	0	0	40.4	1	3410	54	8	9	0	1	1	0
562	32	168	91	32	1	27	2	1	1	0	0	0	0	2	2	0	0	0	0	0	0	0	0	0	0	0	0	0	0	0	0	0	0	0	0	0	0	40.5	1	4250	57	8	9	0	1	1	0
563	27	163	72	27	1	14	2	1	1	0	0	0	0	1	1	0	0	0	0	0	0	0	1	0	0	0	0	0	0	0	0	0	0	1	0	0	0	37.5	1	3328	52	8	9	0	0	0	0
564	42	166	67	24	1	24	2	1	1	0	0	0	0	6	4	1	1	0	1	0	0	0	0	0	0	0	0	0	0	0	0	0	0	0	0	0	0	39.6	1	3620	55	8	9	1	1	0	0
566	25	170	85	29	1	40.4	3	1	0	1	0	1	0	1	2	0	0	0	0	0	0	0	0	0	0	0	0	0	0	0	0	0	0	0	0	0	0	40.4	3	3915	55	8	9	1	1	1	0
567	36	172	110	37	1	12	1	2	0	1	1	1	1	2	1	0	1	0	0	0	0	1	1	0	0	1	1	0	0	0	1	0	0	0	0	0	1	40	1	3622	52	8	9	0	0	0	1
568	34	167	78.5	28	1	29	3	2	0	1	1	0	0	3	2	0	1	0	0	0	0	0	0	0	0	0	0	0	0	1	0	0	0	1	0	1	0	40	1	3875	52	8	9	1	0	0	0
570	22	167	55	20	1	14	2	2	0	1	0	0	0	1	1	0	0	0	0	0	0	0	0	0	0	0	0	0	1	0	1	0	0	0	0	0	0	38.5	1	2488	49	8	9	0	1	0	0
573	32	162	75	29	1	26	2	1	0	1	1	1	0	2	2	0	0	0	1	0	0	0	0	0	0	0	0	0	0	0	1	0	0	0	0	0	1	38.1	2	3776	54	8	9	0	1	1	1
574	40	170	83.5	29	1	27	2	1	0	1	1	0	0	4	3	1	0	0	0	0	0	1	0	0	0	0	0	0	0	0	0	0	0	1	0	0	0	38.3	2	3520	53	8	9	0	1	1	0
575	28	167	79	28	1	11	1	1	0	1	0	0	0	2	2	0	0	0	0	0	0	0	0	0	0	0	0	0	0	0	0	0	0	1	0	0	0	38.6	2	2600	45	8	9	1	0	0	0
576	33	164	72	NA	1	17	2	1	0	1	0	0	0	4	2	2	0	0	0	0	0	0	0	0	0	0	0	0	0	1	0	0	0	0	0	0	0	40	1	3708	56	8	9	1	1	1	0
577	33	158	79	32	1	36	3	1	1	0	0	0	0	1	1	0	0	0	1	0	0	0	0	0	0	0	0	0	0	0	0	0	0	0	0	0	0	39.4	2	4490	57	8	8	1	0	0	0
578	41	172	92	31	1	12	1	2	1	0	0	0	0	5	4	0	1	0	1	1	0	0	0	0	0	0	0	0	0	0	0	0	0	0	0	0	0	40.4	1	3690	52	8	9	0	1	1	0
579	27	168	99	35	1	28	3	1	1	0	0	0	0	1	1	0	0	0	0	0	0	1	1	0	1	0	0	0	0	0	0	0	1	0	0	0	0	40.3	3	4490	58	8	9	1	1	0	0
581	35	NA	NA	NA	1	15	2	2	0	1	0	1	0	2	1	0	1	0	0	0	0	0	0	0	0	0	0	0	0	0	1	0	0	0	0	0	0	40	1	3750	54	8	9	0	0	0	0
582	24	170	96	33	1	30	3	1	0	1	0	1	0	1	1	0	0	0	0	0	0	1	1	0	0	0	0	0	0	0	1	0	0	0	0	0	0	40.6	1	3700	54	8	9	1	0	0	0
583	20	169	87	30	1	27	2	1	0	0	0	1	0	1	1	0	0	0	0	0	0	0	0	0	0	0	0	0	0	0	0	0	0	0	0	0	0	40.6	1	3912	55	8	9	1	1	0	0
585	25	NA	NA	NA	1	12	1	1	1	0	0	0	0	2	2	0	0	0	0	0	0	0	0	0	0	0	0	0	0	0	0	0	0	0	0	0	0	41	1	3604	53	8	8	1	0	0	0
586	37	173	122	41	1	21	2	2	0	1	1	1	1	5	2	3	0	0	0	0	0	0	0	0	0	0	0	0	0	0	1	0	0	0	0	0	0	38.2	1	4280	56	8	9	0	1	1	0
587	37	NA	NA	NA	1	37	3	1	1	0	0	0	0	1	1	0	0	0	0	0	0	1	1	0	0	0	0	0	0	0	0	0	0	0	0	0	0	40.4	1	3980	57	8	8	0	1	1	0
588	36	170	75	26	1	11	1	1	0	1	0	0	0	2	2	0	0	0	0	0	0	0	0	0	0	0	0	0	0	0	0	0	0	0	0	0	0	38.5	1	3350	53	8	9	0	0	0	0
589	36	175	105	34	1	20	2	1	1	0	0	0	0	2	2	0	0	0	1	0	0	0	0	0	0	0	0	0	0	0	0	0	1	0	0	0	0	40.3	1	3700	54	8	9	0	0	0	0
590	33	170	81.7	28	1	20	2	2	0	1	0	0	0	3	2	1	0	0	0	0	0	0	0	0	1	0	0	0	0	0	0	0	0	0	0	0	0	40.4	1	4030	53	8	9	0	1	1	0
591	28	170	79	27	1	NA	1	1	1	0	0	0	0	4	3	0	0	0	0	0	0	0	0	0	0	0	0	0	0	0	0	0	0	0	0	0	0	38.3	3	3704	54	8	9	0	1	1	0
592	30	165	73	27	1	NA	2	1	1	0	0	0	0	3	2	0	1	0	1	0	0	0	0	0	0	1	1	0	1	0	1	0	0	0	0	0	0	39	1	3260	50	8	9	1	0	0	0
593	41	173	97	32	1	24	2	1	0	1	0	0	0	2	2	0	0	0	0	0	0	0	0	0	0	0	0	0	0	0	0	0	0	0	0	0	0	40	1	3950	55	8	8	0	1	0	0
594	28	167	84	30	1	24	2	1	0	0	0	1	0	5	5	0	0	0	0	0	0	0	0	0	0	0	0	0	0	1	1	0	0	1	0	0	0	39.5	1	3876	54	8	9	0	0	0	0
595	31	180	80	25	1	16	2	2	0	1	1	1	1	2	1	0	1	1	0	0	0	0	1	0	0	0	0	0	1	1	1	0	0	1	1	0	0	37.5	1	2850	50	8	9	0	0	1	0
596	38	163	63.5	24	1	32	3	1	0	1	1	0	0	4	2	2	0	0	0	0	0	1	0	0	0	0	0	0	0	0	0	0	0	0	0	0	0	37.6	1	3116	52	8	9	0	0	1	0
598	46	164	76.5	28	1	33	3	1	0	0	0	1	0	1	1	0	0	0	1	0	0	0	0	0	0	0	0	0	0	0	0	1	0	0	0	0	0	37.4	2	3930	54	8	9	0	1	0	0
599	28	157	63	26	1	8	1	1	0	1	0	0	1	4	4	0	0	0	1	0	0	0	0	0	0	0	0	0	0	1	0	0	1	1	0	0	0	35.6	1	2666	48	8	9	0	0	1	0
601	24	168	74	26	1	16	2	1	0	1	0	0	0	1	1	0	0	0	0	0	0	0	0	0	0	0	0	0	0	0	0	0	0	1	0	0	0	38.5	1	3995	57	8	9	0	0	0	0
602	31	172	132	45	1	12	1	1	0	1	0	1	0	1	1	0	0	0	0	0	0	0	0	0	0	0	0	0	0	0	0	0	0	1	1	0	0	39.6	2	4510	55	8	9	0	1	0	0
603	33	156	74.5	31	1	15	2	1	0	1	0	1	0	1	1	0	0	0	0	0	0	1	0	0	0	0	0	0	0	0	0	0	0	0	0	0	0	40.5	3	3380	51	8	9	1	0	0	0
611	41	160	87	34	1	5	1	1	1	0	0	0	0	3	3	0	0	0	0	0	0	0	0	0	0	1	0	1	1	0	0	0	0	1	0	0	0	30	3	1277	36	7	7	0	0	0	0
512	35	162	65	25	1	9	1	1	0	1	1	1	0	3	3	0	0	0	0	0	0	1	1	0	0	0	0	0	0	0	0	0	0	0	0	0	0	38.3	2	3615	53	8	9	0	0	1	0
613	30	169	83	29	1	13	2	1	0	1	0	0	0	1	1	0	0	0	0	0	0	1	0	0	1	0	0	0	0	0	0	0	0	0	1	0	0	40.6	1	3376	53	7	8	0	0	1	0
614	29	165	80	29	1	38	3	1	1	0	0	0	0	2	2	0	0	0	0	0	0	0	0	0	0	0	0	0	0	0	0	0	0	0	0	0	0	39.1	1	3416	52	8	9	1	0	0	0
615	29	166	68	25	1	33	3	2	0	1	1	1	0	3	3	0	0	0	0	0	0	0	0	0	0	0	0	0	0	0	0	0	0	1	0	0	0	38.9	1	2490	49	8	9	1	0	1	0
618	24	163	72	27	1	29	3	2	0	1	1	1	0	1	1	0	0	0	0	0	0	0	0	0	1	0	0	0	0	0	0	0	0	0	0	1	0	40.3	0	3528	53	8	9	0	0	0	0
619	29	164	65	24	1	32	3	1	0	1	0	0	0	1	1	0	0	0	1	0	0	1	0	0	0	0	0	0	1	0	0	0	1	0	0	0	0	39.6	1	3630	54	8	9	1	0	0	0
621	27	170	67	23	1	27	2	1	0	1	0	1	0	1	1	0	0	0	1	0	0	0	0	0	0	0	0	0	0	0	0	0	0	0	0	0	0	40.4	1	3720	55	8	9	1	0	0	0
622	27	165	74	27	1	23	2	1	0	0	0	1	0	2	2	0	0	0	1	0	0	0	0	0	0	0	0	0	0	0	0	0	0	0	0	0	0	39.4	3	3576	53	8	9	1	0	0	0
623	25	164	86	32	1	28	3	2	0	1	1	0	1	1	1	0	0	0	0	0	0	1	1	0	0	0	0	0	0	0	0	1	0	0	0	1	0	39.5	3	3320	52	8	9	1	0	0	1
624	32	165	59	22	1	35	3	1	1	0	0	0	0	2	2	0	0	0	0	0	0	0	0	0	0	0	0	0	0	0	0	0	0	0	0	0	0	38.5	1	3098	52	8	9	1	0	1	0
625	31	175	71	23	1	8	1	1	0	1	0	1	0	1	1	0	0	0	0	0	0	0	0	0	0	0	0	0	0	0	0	0	0	0	0	0	0	40.1	3	3510	53	8	9	1	0	0	0
626	39	160	89	35	1	3	1	1	0	1	1	1	0	2	2	0	0	0	0	1	0	0	0	0	1	0	0	0	0	1	0	0	0	1	0	0	0	40	2	3580	53	8	9	1	0	1	0
627	31	157	57	23	1	15	2	1	0	1	0	0	0	1	1	0	0	0	0	0	0	0	0	0	0	0	0	0	0	0	0	1	0	0	0	0	0	35.4	1	2658	49	8	8	0	0	1	1
628	34	160	66	26	1	35	3	1	0	1	1	0	0	1	1	0	0	0	1	0	0	0	0	0	0	0	0	0	0	0	0	0	0	0	0	0	0	38.6	1	3110	51	8	9	0	0	0	0
629	28	172	67	23	1	18	2	2	1	1	1	1	1	2	2	0	0	0	0	0	1	0	0	0	1	0	0	0	0	0	1	0	0	0	0	0	0	39.6	1	3682	53	8	9	0	0	0	0
630	28	162	65	25	1	36	3	1	0	0	1	0	0	1	1	0	0	0	0	0	0	0	0	0	0	0	0	0	0	0	0	0	0	0	0	1	0	39.2	1	3332	54	7	8	0	0	0	0
631a	41	164	91	34	1	33	3	2	0	1	1	0	0	7	2	3	2	0	0	0	0	0	0	0	0	0	0	0	0	0	0	0	0	1	0	0	0	40.6	1	4200	57	8	9	0	0	1	0
632	32	157	54	22	1	8	1	1	1	0	0	0	0	1	1	0	0	0	0	0	0	0	0	0	0	0	0	0	0	0	0	0	0	0	0	0	0	40.5	3	3518	55	8	9	1	0	1	0
634	32	170	59	20	1	34	3	1	0	1	0	1	0	1	1	0	0	0	1	0	0	0	0	0	0	0	0	0	0	0	0	0	0	0	0	0	0	39.3	1	3128	52	8	9	0	0	1	0
635	40	174	80	26	1	30	3	1	1	0	0	0	0	4	2	1	1	0	0	0	0	0	0	0	0	0	0	0	0	1	0	0	0	0	0	0	0	39.3	1	3276	52	8	9	1	0	0	0
637	31	159	73	29	1	31	3	2	0	1	0	0	0	4	3	1	0	0	0	0	0	1	1	0	0	0	0	0	0	0	0	0	0	0	0	0	0	37.6	3	2690	47	8	9	1	0	0	0
638	36	169	77	27	1	19	2	1	0	1	0	1	0	2	2	0	0	0	1	0	0	0	0	0	0	0	0	0	0	1	0	0	0	1	0	0	0	40.5	1	3500	53	8	8	1	0	0	0
639	33	166	74	27	1	35	3	1	0	1	1	0	0	4	4	0	0	0	0	0	0	0	0	0	0	0	0	0	0	0	0	0	0	0	0	0	0	40.1	1	3040	48	8	8	1	0	0	0
640	35	165	75	28	1	27	2	2	0	1	1	1	1	2	2	0	0	0	0	0	0	0	0	0	0	0	0	0	0	1	1	0	0	0	0	0	0	39.6	3	3602	54	8	8	0	0	1	0
641	30	160	67	26	1	34	3	2	0	1	1	0	1	2	1	0	1	1	0	0	0	1	0	0	0	1	0	1	1	0	0	0	1	0	0	1	0	37.4	1	2734	47	8	8	1	0	0	0
642	36	173	80	27	1	11	1	1	0	0	1	0	0	5	4	1	0	0	0	0	0	0	0	0	0	0	0	0	0	0	0	0	0	1	0	0	0	38.6	1	3982	55	8	9	0	0	0	0
644	22	152	69	30	1	12	1	2	0	1	1	0	1	1	1	0	0	0	1	1	0	0	0	0	0	0	0	0	0	0	1	1	0	0	0	0	0	35.5	1	2400	46	7	8	0	0	1	2
645	31	164	75	28	1	39	3	1	1	0	0	0	0	2	2	0	0	0	1	0	0	0	0	0	0	0	0	0	0	0	0	0	0	0	1	0	0	40.6	1	3460	53	7	8	0	0	0	0
646	45	174	99	33	1	NA	2	1	1	0	0	0	0	3	3	0	0	0	0	0	0	0	0	0	0	0	0	0	0	0	0	0	0	1	0	0	0	40.4	3	3050	50	8	9	1	0	0	0
647	34	167	58	21	1	35	3	2	0	1	1	0	0	3	3	0	0	0	0	0	0	0	0	0	0	0	0	0	0	0	0	0	0	1	0	0	0	40.6	1	3320	52	8	9	1	0	1	0
648	36	160	68	27	1	33	3	1	0	1	0	1	0	2	1	1	0	0	0	0	1	0	0	0	1	0	0	0	0	0	0	1	0	0	0	0	0	39.1	1	2775	48	8	9	0	0	1	1
649	27	165	76	28	1	34	3	1	1	0	0	0	0	1	1	0	0	0	0	0	0	1	1	0	0	0	0	0	0	0	0	0	0	0	0	0	0	39	2	3500	51	8	9	0	0	0	0
650	32	175	112	37	1	5	1	1	0	1	0	1	0	2	2	0	0	0	0	0	0	1	1	0	0	0	0	0	0	0	0	0	0	0	0	0	0	40.1	1	4114	56	7	8	0	0	0	0
652	29	164	68	25	1	30	3	2	0	0	0	0	0	2	2	0	0	0	0	0	0	0	0	0	0	0	0	0	1	0	0	1	1	0	0	0	0	35.4	3	2660	48	7	8	0	0	1	1
653	34	170	62	21	1	10	1	1	0	0	0	1	0	2	1	0	1	0	0	0	0	1	1	1	0	0	0	0	0	0	0	0	1	0	0	0	0	38.4	1	3024	51	8	8	0	0	0	1
654	24	159	58	23	1	17	2	2	0	1	1	1	1	1	1	0	0	0	1	0	0	0	0	0	0	0	0	0	0	0	0	0	0	0	0	0	1	39.4	1	2978	50	7	8	0	0	1	0
657	36	170	65	22	1	22	2	1	1	0	0	0	0	3	2	0	1	0	1	0	0	1	1	0	0	0	0	0	1	0	0	0	1	0	0	0	0	29.2	3	1250	36	6	7	0	0	0	0
658	35	164	68	25	1	8	1	1	1	0	0	0	0	1	1	0	0	0	0	0	0	0	1	1	0	0	0	0	0	1	0	0	0	1	0	0	0	40.4	3	3232	52	8	9	1	0	0	0
659	33	158	65	26	1	26	2	1	0	0	0	1	0	1	1	0	0	0	1	0	0	0	0	0	0	1	1	0	0	0	0	0	0	0	0	0	0	40.1	1	2942	51	8	9	1	0	0	0
660	26	169	66	23	1	30	3	1	0	1	0	0	0	2	1	0	1	0	0	0	0	0	0	0	0	0	0	0	1	0	0	0	0	1	0	0	0	39.4	2	3308	52	8	9	0	0	1	0
661	36	NA	NA	NA	1	35	3	1	1	0	0	0	0	3	3	0	0	0	0	0	0	1	1	0	0	0	0	0	0	0	0	0	0	0	0	0	0	37.6	1	2955	49	8	9	1	0	0	0
662	27	163	84	32	1	11	1	1	0	1	0	1	0	2	2	0	0	0	1	0	0	0	0	0	0	0	0	0	0	0	0	0	0	0	0	0	0	38.2	1	2950	49	8	9	0	0	1	0
663	30	164	79	29	1	30	3	1	1	0	0	0	0	2	2	0	0	0	0	0	0	1	0	0	0	0	0	0	0	0	0	0	0	0	0	0	0	39.1	2	3640	54	8	9	1	0	0	0
665	38	164	75	28	1	35	3	1	0	1	0	0	0	1	1	0	0	0	1	0	0	0	0	0	0	0	0	0	0	0	0	0	0	0	0	0	0	38.3	1	3806	55	8	8	0	0	1	0
666	30	167	65	23	1	33	3	1	0	0	1	0	0	1	1	0	0	1	0	0	0	1	0	0	0	0	0	0	0	0	0	0	0	0	0	0	0	38	2	2736	50	8	9	1	0	0	0
667	40	175	95	31	1	13	2	1	0	1	1	0	0	12	12	0	0	0	0	0	0	0	0	0	0	0	0	0	0	0	0	1	0	0	0	0	0	35.6	1	2893	49	8	9	0	0	1	1
668	38	175	71	23	31	33	3	1	0	1	1	1	0	1	1	0	0	0	0	0	0	0	0	0	0	0	0	0	0	0	0	0	0	0	0	0	0	31	1	2925	50	8	9	0	0	0	0
671	34	155	61	26	1	25	2	1	0	1	0	1	0	2	2	0	0	0	0	0	0	0	0	0	0	0	0	0	0	0	0	0	0	0	0	0	0	39.1	1	3284	51	8	9	0	0	0	0
673	33	173	103	34	1	25	2	1	0	0	0	1	0	5	2	3	0	0	0	0	0	0	0	0	0	0	0	0	0	0	0	0	0	0	0	0	0	39.1	1	4152	58	8	9	0	0	1	0
674	31	164	60	22	1	35	3	1	0	1	0	1	0	1	1	0	0	0	0	0	0	1	0	0	0	0	0	0	0	0	0	0	0	0	0	0	0	40.5	3	3520	53	8	9	0	0	1	0
675	35	177	90	29	1	34	3	1	1	0	0	0	0	6	3	2	1	0	0	0	0	0	0	0	0	0	0	0	0	0	0	0	0	0	0	0	0	39.2	2	3480	52	8	9	0	0	1	0
676	30	177	73	23	1	33	3	1	0	0	0	1	0	1	1	0	0	0	1	0	0	0	0	0	0	0	0	0	0	0	0	0	0	0	0	0	0	40	1	4180	55	8	9	0	0	0	0
677	23	165	65	NA	1	27	2	1	0	0	0	1	0	2	2	0	0	0	0	0	0	0	0	0	0	0	0	0	0	0	0	0	0	0	0	0	0	39	1	3242	50	8	9	1	0	0	0
678	23	168	71	25	1	35	3	1	0	0	0	1	0	2	2	0	0	0	1	0	0	0	0	0	0	0	0	0	0	0	0	0	0	0	0	0	0	39.5	1	3428	53	8	9	0	0	0	0
679	35	178	80	25	1	26	2	1	0	0	0	1	0	5	2	0	1	0	0	0	0	1	1	0	0	0	0	0	0	0	0	0	0	0	0	0	0	33.5	2	1900	43	7	7	0	0	0	0
680	36	165	57	25	1	32	3	1	1	0	0	1	0	2	2	0	0	0	0	0	0	0	0	0	0	0	0	0	0	0	0	0	0	0	0	0	0	39.4	1	3654	52	8	9	0	0	1	1
681	28	NA	NA	NA	1	10	1	2	0	1	1	1	0	1	1	0	0	0	0	0	0	1	0	0	1	0	0	0	0	0	0	0	1	1	0	0	0	38.2	1	3434	54	8	8	0	0	0	0
682a	34	158	75	30	1	35	3	1	0	1	1	1	0	6	4	0	2	0	1	0	0	0	0	0	0	0	0	0	0	0	0	0	0	0	0	0	0	36.4	1	3342	52	8	8	0	0	1	0
684	28	165	78	29	1	35	3	1	0	0	0	1	0	1	1	0	0	0	0	0	0	0	0	0	0	0	0	0	0	0	0	0	0	0	0	0	0	40.4	1	3994	54	8	9	0	0	0	0
685	30	163	84	32	1	4	1	1	0	1	0	0	0	1	1	0	0	0	0	0	0	0	0	0	0	0	0	0	0	0	0	0	0	0	0	0	0	39.4	1	3362	54	8	9	1	0	1	0
686	30	171	60	21	1	2	1	1	0	1	1	0	0	1	1	0	0	0	0	0	0	0	0	0	1	0	0	0	0	0	0	0	1	1	0	0	0	39.5	1	3100	52	8	9	0	0	1	0
687a	35	159	75	30	1	28	3	1	0	0	1	1	0	2	2	0	0	0	0	0	0	0	0	0	0	0	0	0	0	0	0	0	0	0	0	0	0	36.3	2	2790	47	8	9	0	0	0	0
689	31	173	76	25	1	28	3	1	0	0	0	1	0	1	1	0	0	0	0	0	0	0	0	0	0	0	0	0	0	0	0	0	0	0	0	0	0	39.4	1	3280	52	8	9	0	0	1	0
690	26	159	71	28	1	NA	1	1	0	1	0	1	0	1	1	0	0	0	0	0	0	0	0	0	0	0	0	0	0	0	0	0	0	0	0	0	0	39.2	1	2878	53	8	8	0	0	1	0
691	35	170	75	26	1	2	1	1	0	1	0	0	0	5	3	0	2	0	0	0	0	0	0	0	0	0	0	0	0	0	0	0	0	0	0	0	0	34.2	1	2245	48	7	8	0	0	1	0
692	41	165	105	39	1	31	3	2	0	1	1	1	1	4	3	1	0	0	1	0	0	0	0	0	0	0	0	0	0	0	0	0	0	0	0	0	0	39.3	2	3660	53	8	9	1	0	1	0
693	24	168	78	28	1	12	1	1	0	1	1	0	0	4	2	2	0	0	0	0	0	0	0	0	1	0	0	0	0	0	0	0	0	0	0	0	0	38.3	1	2910	50	8	9	0	0	0	0
695	27	164	70	26	1	37	3	1	0	1	0	0	0	2	1	0	1	0	1	0	0	0	0	0	0	0	0	0	0	0	0	0	0	0	0	0	0	39.4	1	3676	53	8	9	0	0	1	1
780	30	171	88	NA	1	29	3	1	1	0	0	0	0	1	1	0	0	0	0	0	0	0	0	0	0	0	0	0	0	0	0	0	0	1	0	0	0	40.4	1	3430	52	8	9	0	0	1	0
784	NA	163	70	26	1	29	3	2	0	1	1	1	1	2	2	0	0	0	1	0	0	0	0	0	0	0	0	0	0	0	0	0	0	0	0	0	0	38.4	3	3220	53	8	9	0	0	0	0
696	35	167	70	25	1	35	3	1	1	0	0	0	0	3	3	0	0	0	0	0	0	1	1	0	0	1	0	0	0	0	0	0	0	0	0	0	0	37	3	2590	47	8	8	0	0	0	0
709a	39	164	91	34	1	4	1	1	1	0	0	0	0	2	1	0	0	0	0	0	0	1	1	0	0	0	0	0	1	0	0	1	0	1	0	0	0	39.2	1	2898	52	8	8	0	0	0	2
738	39	174	77	26	1	12	1	1	1	0	0	0	0	3	3	0	0	0	0	0	0	1	0	0	0	0	0	0	0	0	0	0	0	0	0	0	0	39.6	1	3650	54	8	9	0	0	0	0
748	29	155	56	23	1	6	1	1	0	0	1	1	0	2	2	0	0	0	0	0	0	0	0	0	0	0	0	0	0	0	0	0	0	0	0	0	0	38.5	1	3010	51	8	9	0	0	1	0
769	37	164	75	28	1	5	1	1	0	0	1	1	0	1	1	0	0	0	0	0	0	0	0	0	0	0	0	0	0	0	0	0	0	0	0	0	0	40.1	1	3464	52	8	9	0	0	0	0
771	34	173	74	25	1	12	1	1	1	0	0	0	0	3	2	0	1	0	0	1	0	0	0	0	0	0	0	0	0	0	0	0	0	0	0	0	0	40.1	1	3728	53	8	9	1	0	0	0
803	39	160	66	26	1	8	1	1	0	1	1	0	0	2	2	0	0	0	0	0	0	0	0	0	1	0	0	0	0	0	0	0	0	0	0	0	0	40.3	1	3866	55	8	9	0	0	0	0
683	27	163	67	25	1	25	2	1	0	1	0	0	0	1	1	0	0	0	0	0	0	0	0	0	0	0	0	0	0	0	0	1	0	0	0	0	0	40.5	1	3198	51	8	9	1	0	0	1
807	38	173	74	25	1	11	1	1	1	0	0	0	0	2	2	0	0	0	0	0	0	0	0	0	0	0	0	0	0	0	0	0	0	0	0	0	0	40.1	1	3430	52	8	9	0	0	1	0
43	35	165	70	26	1	6	1	1	0	0	1	0	0	2	2	0	0	0	0	0	0	0	0	0	0	0	0	0	0	0	0	1	0	0	0	0	0	40.5	1	3710	54	8	8	0	0	1	1
279	32	160	58	23	1	9	1	1	0	1	0	1	0	2	1	1	0	0	0	0	0	0	0	0	0	0	0	0	0	0	0	0	0	0	0	0	0	40	1	3448	53	8	9	1	0	0	0
789	22	167	109	39	1	12	1	1	0	1	0	1	0	2	1	1	0	0	0	0	0	0	0	0	0	0	0	0	0	0	0	0	0	0	0	0	0	40.1	1	3338	52	8	9	0	0	0	0
2	28	169	94	33	1	26	2	1	0	0	1	1	0	1	1	0	0	0	0	0	0	0	0	0	0	0	0	0	1	0	0	0	0	0	0	0	0	40.4	1	3660	53	8	9	0	0	0	0
823	31	165	72	27	1	NA	1	1	1	0	0	0	0	1	1	0	0	0	0	0	0	0	0	0	0	0	0	0	0	0	0	0	0	1	0	0	0	40.2	1	3590	54	8	9	0	0	0	0
569	35	160	78	30	1	12	1	1	0	0	1	0	0	3	2	0	1	0	0	0	0	0	0	0	0	0	0	0	0	1	0	0	0	0	0	0	0	37	2	2500	49	8	8	1	0	0	0
773	34	173	71	24	1	27	2	1	1	0	0	0	0	2	1	1	0	0	0	0	0	1	1	0	0	0	0	0	1	0	0	0	0	0	0	0	0	40.1	3	3976	56	8	9	0	0	1	0
768	30	158	72	29	1	32	3	1	0	0	1	1	0	1	1	0	0	0	0	0	0	0	0	0	0	0	0	0	0	0	0	0	0	0	0	0	0	39.6	0	3875	54	8	9	0	0	1	0
732	31	170	64	22	1	31	3	1	1	0	0	0	0	1	1	0	0	0	0	0	0	1	1	1	0	0	0	0	0	0	0	0	0	0	0	0	0	38.5	0	3100	50	8	9	1	0	0	1
766a	31	166	64	23	1	25	2	1	1	0	0	0	0	3	2	0	1	0	0	0	0	0	0	0	0	0	0	0	0	0	0	0	0	0	0	0	0	39.2	1	3290	51	8	9	1	0	1	0
764	33	162	75	29	1	26	2	1	0	1	0	0	0	3	3	0	0	0	0	0	0	0	0	0	0	0	0	0	0	0	0	0	0	0	0	0	0	40.3	1	3862	52	8	9	1	0	1	0
762	38	164	74	28	1	38	3	1	0	1	0	1	0	3	2	1	0	0	0	0	0	0	0	0	0	1	1	0	0	0	0	0	0	1	0	0	0	40	1	3922	57	8	9	0	0	0	0
761	31	162	60	23	1	30	3	1	0	1	1	0	0	3	2	1	0	0	0	0	0	0	1	0	0	1	1	1	1	0	1	0	0	1	0	0	0	37.2	1	3060	51	8	9	1	0	1	0
760a	33	165	96	35	1	17	2	1	0	0	0	1	0	1	1	0	0	0	0	0	0	0	0	0	0	0	0	0	0	0	0	0	0	1	0	0	0	41.1	3	3680	52	8	8	1	0	0	0
758	31	170	84	29	1	31	3	1	0	1	1	1	0	1	1	0	0	0	1	0	0	1	1	0	0	0	0	0	0	0	0	0	0	0	1	0	0	40	3	3934	55	8	9	0	0	0	0
757	33	162	73	28	1	24	2	1	0	1	1	1	0	2	2	0	0	0	0	0	0	0	0	0	0	0	0	0	0	0	0	0	0	1	0	0	0	40.3	1	3256	51	8	9	1	0	1	0
756	27	NA	NA	NA	1	30	3	1	1	0	0	0	0	2	1	1	0	0	0	0	0	0	0	0	0	0	0	0	0	0	0	0	0	0	0	0	0	40.3	1	4196	56	8	9	0	0	0	0
755	39	170	76	26	1	32	3	1	0	1	1	0	0	2	2	0	0	0	0	0	0	0	1	0	0	0	0	0	0	0	0	0	0	0	0	0	0	40.2	1	4138	55	8	9	0	0	0	0
728	27	168	69	24	1	31	3	1	1	0	0	0	0	4	3	0	1	0	0	0	0	0	1	0	0	0	0	0	0	0	0	0	0	1	0	0	0	38.5	1	3296	52	8	9	0	0	0	0
714	37	168	93	33	1	34	3	1	0	1	0	1	0	4	3	1	0	0	0	0	0	0	0	0	0	0	0	0	0	0	0	0	0	1	0	0	0	38.1	1	3426	51	8	9	0	0	1	0
698	30	161	93	36	1	27	2	1	0	1	1	0	0	1	1	0	0	0	1	0	0	0	0	0	0	1	1	0	1	0	0	0	0	0	1	0	0	35.4	3	2410	46	8	9	0	0	0	0
737	29	170	22	30	1	32	3	1	0	0	0	1	0	2	1	0	1	0	0	0	0	0	1	0	0	0	0	0	0	0	0	0	1	0	0	0	0	40.1	1	3426	53	8	9	1	0	1	0
736	32	158	72	29	1	19	2	1	0	0	0	1	0	1	1	0	0	0	0	0	0	0	0	0	0	0	0	0	0	0	0	0	0	0	0	0	0	39.2	1	2824	50	6	7	0	0	1	1
735	27	168	75	27	1	28	3	1	0	1	0	1	0	1	1	0	0	0	1	0	0	0	0	0	0	0	0	0	0	0	0	0	0	1	0	0	0	40	1	3230	51	8	9	1	0	0	0
822	26	169	68	24	1	19	2	1	0	1	0	0	0	1	1	0	0	0	0	0	0	0	0	0	0	0	0	0	0	0	0	0	0	1	0	0	0	36.1	1	2283	47	8	9	0	0	0	0
821	29	160	64	25	1	16	2	1	0	0	0	1	0	3	2	0	1	0	0	0	0	0	0	0	0	0	0	0	0	0	0	0	0	0	0	0	0	39.5	1	3622	54	8	9	1	0	0	0
819	35	170	72	25	1	18	2	2	0	1	1	1	1	3	2	0	1	0	0	0	0	0	0	0	0	0	0	0	0	0	0	0	0	1	0	0	0	40.3	1	3785	52	8	9	0	0	0	1
818	33	164	71	26	1	22	2	1	0	1	0	0	0	1	1	0	0	0	0	0	0	0	0	0	0	0	0	0	0	0	0	1	0	1	0	0	0	40.5	3	3770	54	8	9	1	0	0	1
816	37	164	66.5	25	1	12	1	1	1	0	0	0	0	3	3	0	0	0	1	0	0	1	1	0	0	0	0	0	0	0	0	0	0	0	0	0	0	37.4	3	2840	48	8	8	0	0	1	0
810	29	165	65	25	1	12	1	1	0	1	1	0	0	1	1	0	0	0	0	0	0	0	0	0	0	0	0	0	0	0	0	0	0	1	0	0	0	38.6	1	3508	53	8	8	0	0	0	0
809	40	160	63.5	25	1	12	1	1	1	0	0	0	0	2	2	0	0	0	1	0	0	0	0	0	0	0	0	0	0	0	0	0	1	0	0	0	0	36.3	1	2978	51	8	8	0	0	1	0
808	34	160	75	29	1	34	3	1	0	0	0	1	0	3	2	0	1	0	0	0	0	0	0	0	0	0	0	0	0	0	0	0	0	1	0	0	0	41.4	2	4108	54	8	9	0	0	0	0
805	28	175	80	28	1	28	3	1	0	1	0	1	0	3	2	0	1	0	0	0	0	0	0	0	0	0	0	0	0	0	0	0	0	0	0	0	0	40.1	1	4192	55	8	9	0	0	0	0
804	31	162	87	33	1	22	2	2	0	1	1	0	1	4	3	1	0	0	1	0	0	0	0	0	0	0	0	0	0	0	0	1	0	1	0	0	0	36.4	1	2870	49	8	9	0	0	1	1
799	33	162	94	36	1	26	2	1	0	0	0	0	0	2	1	1	0	0	0	0	0	0	0	0	0	0	0	0	0	0	0	0	0	0	1	0	0	40.4		3616	52	8	9	0	0	0	0
792	25	164	70	26	1	20	2	1	1	0	0	0	0	1	1	0	0	0	0	0	0	0	1	0	0	1	0	1	0	0	0	0	0	0	0	0	0	40.4	1	3338	52	8	9	1	0	0	0
791	32	168	72	26	1	22	2	1	0	0	0	1	0	4	3	0	1	0	1	0	0	0	0	0	0	0	0	0	0	0	0	0	0	0	0	0	0	37.6	1	2751	48	8	9	1	0	0	0
787	31	172	76	26	1	28	3	1	0	1	1	0	0	1	1	0	0	0	0	0	0	0	0	0	0	0	0	0	0	1	0	0	0	0	0	0	0	40.1	1	3965	56	7	8	0	0	0	0
785	30	156	69	28	1	32	3	1	0	0	1	0	0	2	2	0	0	0	0	0	0	0	0	0	0	0	0	0	0	0	0	1	0	1	0	0	0	41.1	1	3536	52	8	9	0	0	0	1
783	30	165	71	26	1	27	2	1	0	1	1	1	0	3	2	0	1	0	0	0	0	0	0	0	0	0	0	0	0	0	0	0	0	0	0	0	0	40.5	1	3765	54	8	9	1	0	0	0
781	30	NA	NA	NA	1	35	3	1	0	1	0	1	0	2	2	0	0	0	0	0	0	0	0	0	0	0	0	1	1	1	0	0	0	0	0	0	0	38.2	1	2816	50	8	9	1	0	0	0
777	26	160	63	25	1	25	2	1	0	1	0	1	0	1	1	0	0	0	1	0	0	0	0	0	0	0	0	0	0	1	0	0	0	0	0	0	0	40.4	1	3308	53	8	9	1	0	0	1
776	36	162	71	27	1	32	3	1	1	0	0	0	0	4	2	0	1	0	0	0	0	0	0	0	0	0	0	0	0	1	0	0	0	0	0	0	0	39.2	3	3220	51	8	9	0	0	0	0
772	38	164	64	24	1	30	3	1	1	0	0	0	0	3	2	0	1	0	0	0	0	0	0	0	0	0	0	0	0	0	0	0	0	0	0	0	0	39	1	3195	51	8	9	1	0	0	0
770	33	183	91	28	1	25	2	1	0	1	1	0	0	1	1	0	0	0	0	0	0	0	1	0	0	0	0	0	0	0	0	1	0	1	0	0	0	38.2	1	4220	54	8	9	0	0	0	1
610	33	NA	103	NA	1	15	2	1	0	1	1	0	0	3	3	0	0	0	0	0	0	0	1	0	0	0	0	0	0	0	0	0	0	0	1	0	0	38.3	2	3084	52	8	9	1	0	0	0
798	29	168	65	23	1	24	2	1	1	0	0	0	0	2	1	1	0	0	1	0	0	0	1	0	0	0	0	0	0	0	0	0	0	0	0	0	0	40	1	2980	51	5	7	0	0	1	0
795	41	163	74	28	1	16	2	2	0	1	1	1	1	1	1	0	0	0	0	0	0	0	0	1	0	0	0	0	0	1	0	0	0	0	0	0	0	40.5	2	3410	50	8	9	1	0	0	1
794	26	160	61	24	1	24	2	1	0	0	0	1	0	1	1	0	0	0	0	0	0	0	0	0	0	0	0	0	0	0	0	0	0	1	0	0	0	40.1	1	3185	49	8	9	0	0	0	0
40	29	168	72	26	0	NA	NA	NA	NA	NA	NA	NA	NA	2	2	0	0	0	0	0	0	0	0	0	0	0	0	0	0	0	0	0	1	0	0	0	0	40.1	1	3658	53	8	9	1	0	0	0
41	24	175	75	25	0	NA	NA	NA	NA	NA	NA	NA	NA	1	1	0	0	0	1	0	0	0	0	0	0	0	0	0	0	0	0	0	0	0	0	0	0	39.3	1	3640	55	8	9	1	0	0	0
52	32	165	79	29	0	NA	NA	NA	NA	NA	NA	NA	NA	1	1	0	0	0	0	0	0	0	0	0	0	0	0	0	0	0	0	0	0	1	0	0	0	40	1	3618	53	8	9	1	0	0	0
124	33	173	105	35	0	NA	NA	NA	NA	NA	NA	NA	NA	2	2	0	0	0	0	0	0	0	0	1	0	0	0	0	0	0	0	0	0	0	0	0	0	39	1	3558	53	8	9	0	0	1	1
331	33	170	70	24	0	NA	NA	NA	NA	NA	NA	NA	NA	1	1	0	0	0	0	0	0	0	0	0	0	0	0	0	0	0	0	0	0	0	0	0	0	39	1	3616	53	8	9	0	0	0	0
332	32	174	63	21	0	NA	NA	NA	NA	NA	NA	NA	NA	4	4	0	0	0	0	0	0	0	0	0	0	0	0	0	0	0	0	0	0	0	0	0	0	40.2	1	3650	53	8	9	1	0	0	0
333	27	168	66	23	0	NA	NA	NA	NA	NA	NA	NA	NA	3	3	0	0	0	0	0	0	0	0	0	0	0	0	0	0	0	0	0	0	0	0	0	0	40.2	1	3356	51	8	9	1	0	0	0
343	25	168	67	24	0	NA	NA	NA	NA	NA	NA	NA	NA	1	1	0	0	0	0	0	0	0	0	0	0	0	0	0	0	0	0	0	0	0	0	0	0	40.2	1	3234	52	8	9	1	0	0	0
348	26	168	75	27	0	NA	NA	NA	NA	NA	NA	NA	NA	1	1	0	0	0	0	0	0	0	0	0	0	0	0	0	0	0	0	0	0	0	0	0	0	40.5	1	3272	52	7	8	0	0	0	0
349	28	158	66	26	0	NA	NA	NA	NA	NA	NA	NA	NA	1	1	0	0	0	1	0	0	0	0	0	0	0	0	0	0	1	0	0	0	1	1	0	1	40.2	1	3448	55	8	9	1	0	0	1
350	28	170	88	31	0	NA	NA	NA	NA	NA	NA	NA	NA	2	2	0	0	0	1	0	0	0	0	0	0	0	0	0	0	0	0	0	0	0	0	0	0	39.1	3	4072	55	8	9	0	0	0	0
355	21	163	59	22	0	NA	NA	NA	NA	NA	NA	NA	NA	1	1	0	0	0	0	0	0	1	1	0	0	0	0	0	0	0	0	0	0	1	0	0	0	39.3	1	3638	53	8	9	1	0	0	0
447	34	162	66	25	0	NA	NA	NA	NA	NA	NA	NA	NA	2	2	0	0	0	0	0	0	0	0	0	0	0	0	0	0	0	0	0	0	0	0	0	0	40.1	1	3004	52	7	8	0	0	0	0
477	32	182	76	23	0	NA	NA	NA	NA	NA	NA	NA	NA	3	3	0	0	0	0	0	0	0	0	0	0	0	0	0	0	0	0	0	0	0	0	0	0	37.5	1	3312	52	8	9	1	0	0	0
486	31	170	56	19	0	NA	NA	NA	NA	NA	NA	NA	NA	3	2	0	0	0	0	0	0	1	1	0	0	0	0	0	0	0	0	0	0	1	0	0	0	39.6	2	3410	52	8	9	0	0	1	0
516	37	169	78	27	0	NA	NA	NA	NA	NA	NA	NA	NA	2	2	0	0	0	0	0	0	0	0	0	0	0	0	0	0	0	0	0	0	0	0	0	0	40.2	1	3766	55	8	9	1	0	0	0
542	30	162	64	24	0	NA	NA	NA	NA	NA	NA	NA	NA	2	2	0	0	0	0	0	0	0	0	0	0	0	0	0	0	1	0	0	0	0	0	0	0	41	1	3826	54	8	9	0	0	0	0
543	39	175	89	29	0	NA	NA	NA	NA	NA	NA	NA	NA	2	2	0	0	0	0	0	0	0	0	0	0	0	0	0	0	0	0	0	0	0	0	0	0	40.5	1	3588	54	8	9	0	0	0	0
544	37	170	110	38	0	NA	NA	NA	NA	NA	NA	NA	NA	3	2	1	0	0	0	0	0	0	0	0	0	0	0	0	0	0	0	0	0	0	0	0	0	39	1	3492	53	8	9	0	0	0	0
570a	34	164	66	25	0	NA	NA	NA	NA	NA	NA	NA	NA	2	2	0	0	0	0	0	0	0	0	0	0	0	0	0	0	0	0	0	0	0	0	0	0	38.4	2	3274	51	8	9	0	0	0	0
604	30	175	91	30	0	NA	NA	NA	NA	NA	NA	NA	NA	2	1	0	1	0	1	0	0	0	0	0	0	0	0	0	0	0	0	0	0	0	0	0	0	39.4	1	3720	54	8	9	1	0	0	0
617	23	173	65	22	0	NA	NA	NA	NA	NA	NA	NA	NA	1	1	0	0	0	0	0	0	0	0	0	0	0	0	0	0	0	0	0	0	0	0	0	0	39.5	2	3220	52	8	9	1	0	1	0
628	26	164	70	26	0	NA	NA	NA	NA	NA	NA	NA	NA	1	1	0	0	0	0	0	0	0	0	0	0	0	0	0	0	0	0	0	0	0	0	0	0	39.2	1	3396	52	8	9	1	0	1	0
631	42	160	74	29	0	NA	NA	NA	NA	NA	NA	NA	NA	4	2	0	2	0	0	0	0	1	1	0	0	0	0	0	0	0	0	0	0	0	0	0	0	38.5	2	3146	51	8	9	1	0	1	0
656	36	162	77	29	0	NA	NA	NA	NA	NA	NA	NA	NA	2	2	0	0	0	1	1	0	0	0	0	0	0	0	0	0	1	0	0	0	1	0	0	0	40.2	3	3468	55	8	9	1	0	0	0
685a	34	170	86	30	0	NA	NA	NA	NA	NA	NA	NA	NA	2	2	0	0	0	0	0	0	0	0	0	0	0	0	0	0	0	0	0	0	1	0	0	0	39.6	1	3510	51	8	9	1	0	0	0
687	34	173	82	27	0	NA	NA	NA	NA	NA	NA	NA	NA	3	2	0	1	0	1	0	0	0	0	0	0	0	0	0	0	0	0	0	0	1	0	0	0	40.1	3	3500	53	8	9	1	0	0	0
688	34	173	78	26	0	NA	NA	NA	NA	NA	NA	NA	NA	2	2	0	0	0	0	0	0	0	0	0	0	0	0	0	0	0	0	0	0	0	0	0	0	39.6	1	3780	54	8	9	1	0	0	0
708	37	150	58	26	0	NA	NA	NA	NA	NA	NA	NA	NA	4	2	1	1	0	0	0	1	0	0	0	1	0	0	0	0	0	0	0	0	1	0	0	0	39.5	2	3250	53	8	9	1	0	0	0
709	29	157	60	24	0	NA	NA	NA	NA	NA	NA	NA	NA	1	1	0	0	0	0	0	0	0	0	0	0	0	0	0	0	1	0	0	1	0	0	0	0	39.4	2	3280	52	8	9	0	0	0	0
710	29	169	63	22	0	NA	NA	NA	NA	NA	NA	NA	NA	2	2	0	0	0	1	0	0	0	0	0	0	0	0	0	0	0	0	0	0	1	0	0	0	40.1	1	3580	53	8	9	1	0	0	0
711	29	165	60	22	0	NA	NA	NA	NA	NA	NA	NA	NA	1	1	0	0	0	1	0	0	0	0	0	0	0	0	0	0	0	0	0	0	0	0	0	0	41.1	1	3860	55	8	9	1	0	0	0
712	31	162	72	27	0	NA	NA	NA	NA	NA	NA	NA	NA	2	2	0	0	0	0	0	0	1	1	0	0	0	0	0	0	0	0	0	0	0	0	0	0	38.6	2	3660	53	8	9	0	0	0	0
713	42	168	60	21	0	NA	NA	NA	NA	NA	NA	NA	NA	3	3	0	0	0	0	0	0	0	0	0	0	0	0	0	0	0	0	0	0	0	0	0	0	40	1	3192	51	8	9	1	0	0	0
719	35	165	71	26	0	NA	NA	NA	NA	NA	NA	NA	NA	1	1	0	0	0	0	0	0	0	0	0	0	0	0	0	0	0	0	0	0	1	0	0	0	40	1	3012	49	8	9	0	0	1	0
720	37	164	78	29	0	NA	NA	NA	NA	NA	NA	NA	NA	6	3	3	0	0	0	0	0	1	1	0	0	0	0	0	1	0	0	0	0	1	0	0	0	36.1	2	2616	50	6	7	0	0	0	0
721	39	165	63	23	0	NA	NA	NA	NA	NA	NA	NA	NA	1	1	0	0	0	0	0	0	0	0	0	0	0	0	0	0	0	0	1	0	0	0	0	0	39.2	3	3612	54	8	9	1	0	0	2
730	36	165	89	33	0	NA	NA	NA	NA	NA	NA	NA	NA	2	1	0	1	0	0	0	0	0	0	0	0	0	0	0	0	0	0	0	0	0	0	0	0	38.5	2	4284	56	8	9	0	0	0	0
731	33	170	69	24	0	NA	NA	NA	NA	NA	NA	NA	NA	1	1	0	0	0	0	0	0	1	1	0	0	0	0	0	0	1	0	0	0	1	0	0	0	39.2	1	3210	51	8	9	1	0	0	0
732a	32	176	89	29	0	NA	NA	NA	NA	NA	NA	NA	NA	2	2	0	0	0	0	0	0	0	0	0	0	0	0	0	0	0	0	0	1	0	0	0	0	39.1	1	3610	53	8	9	1	0	0	0
744	33	170	74	26	0	NA	NA	NA	NA	NA	NA	NA	NA	1	1	0	0	0	0	0	0	0	0	0	0	0	0	0	0	0	0	0	0	0	0	0	0	39.3	1	3780	54	8	9	1	0	0	0
745	36	164	74	28	0	NA	NA	NA	NA	NA	NA	NA	NA	1	1	0	0	0	0	0	0	0	0	0	0	0	0	0	0	0	0	0	0	0	0	0	0	38.3	1	3434	53	7	8	0	0	0	0
746	31	173	67	22	0	NA	NA	NA	NA	NA	NA	NA	NA	2	2	0	0	0	0	0	0	0	0	0	0	0	0	0	0	0	0	0	0	1	0	0	0	40.6	1	3836	55	8	9	1	0	0	0
747	33	160	62	24	0	NA	NA	NA	NA	NA	NA	NA	NA	2	2	0	0	0	0	0	0	0	0	0	0	0	0	0	0	1	0	0	0	0	0	0	0	40.4	1	4276	55	8	9	0	0	0	0
748a	27	168	64	23	0	NA	NA	NA	NA	NA	NA	NA	NA	3	1	0	2	0	0	1	0	0	0	0	0	0	0	0	0	1	0	0	0	0	0	0	0	39	2	2960	50	8	9	1	0	0	0
754	33	170	60	21	0	NA	NA	NA	NA	NA	NA	NA	NA	1	1	0	0	0	0	0	0	0	0	0	0	0	0	0	0	0	0	0	0	1	0	0	0	40.5	1	3828	55	8	8	1	0	0	0
755a	20	173	102	34	0	NA	NA	NA	NA	NA	NA	NA	NA	1	1	0	0	0	0	0	0	0	0	0	0	0	0	0	0	0	0	0	1	0	0	0	0	38.5	1	3060	51	8	9	1	0	0	0
756a	37	163	66	25	0	NA	NA	NA	NA	NA	NA	NA	NA	2	2	0	0	0	0	0	0	0	0	0	0	0	0	0	0	0	0	0	0	1	0	0	0	39.4	1	3440	54	8	9	1	0	0	0
757a	36	168	83	30	0	NA	NA	NA	NA	NA	NA	NA	NA	3	3	0	0	0	1	0	0	0	0	0	0	0	0	0	0	0	0	0	0	0	0	0	0	40	1	2755	51	8	9	0	0	0	0
758a	33	173	76	25	0	NA	NA	NA	NA	NA	NA	NA	NA	2	2	0	0	0	0	0	0	0	0	0	0	0	0	0	0	0	0	0	0	1	0	0	0	41	1	3914	55	8	9	1	0	0	0
759	38	162	80	31	0	NA	NA	NA	NA	NA	NA	NA	NA	2	2	0	0	0	0	0	1	0	0	0	1	0	0	0	0	0	0	0	0	0	0	0	0	39.6	2	3515	53	8	9	1	0	0	0
760	35	163	95	36	0	NA	NA	NA	NA	NA	NA	NA	NA	3	1	2	0	0	0	0	0	0	0	0	0	0	0	0	0	0	0	0	0	1	0	0	0	39.4	2	3370	53	8	9	1	0	0	0
761a	34	164	83	31	0	NA	NA	NA	NA	NA	NA	NA	NA	3	3	0	0	0	0	0	0	0	0	0	0	0	0	0	0	0	0	0	0	1	0	0	0	39.6	1	4060	57	8	9	0	0	0	0
762a	36	161	67	26	0	NA	NA	NA	NA	NA	NA	NA	NA	2	2	0	0	0	0	0	0	0	0	0	0	0	0	0	0	0	0	0	0	1	0	0	0	40.3	1	3062	50	8	9	1	0	0	0
763	33	171	74	25	0	NA	NA	NA	NA	NA	NA	NA	NA	2	2	0	0	0	0	0	0	0	0	0	0	0	0	0	0	1	0	0	0	0	0	0	0	38.4	2	3600	53	8	9	1	0	0	0
764a	42	170	84	29	0	NA	NA	NA	NA	NA	NA	NA	NA	1	1	0	0	0	0	0	0	0	0	0	0	0	0	0	0	0	0	0	0	0	0	0	0	38.4	2	3150	50	8	9	1	0	0	0
765	32	135	61	33	0	NA	NA	NA	NA	NA	NA	NA	NA	3	3	0	0	0	0	0	0	0	0	0	0	0	0	0	0	0	0	0	0	1	0	0	0	38.2	2	3010	50	7	8	1	0	0	0
766	33	160	68	27	0	NA	NA	NA	NA	NA	NA	NA	NA	2	2	0	0	0	1	0	0	0	0	0	0	0	0	0	0	0	0	0	0	1	0	0	0	38.5	1	2950	49	8	9	1	0	1	0
767	29	165	82	30	0	NA	NA	NA	NA	NA	NA	NA	NA	1	1	0	0	0	0	0	0	0	0	0	0	0	0	0	0	0	0	0	0	0	0	0	0	41	3	3222	50	8	9	1	0	1	0

## Sheet: maternal plasma, positive mode
samples	CE(16:0)+NH4	CE(18:0)+NH4	CE(18:1)+NH4	CE(18:2)+NH4	CE(20:3)+NH4	CE(20:4)+NH4	CE(22:6)+NH4	DG(16:0_18:1)+NH4	DG(16:0_18:2)+NH4	DG(18:1_18:1)+NH4	DG(18:1_18:2)+NH4	DGTS(20:3_22:6)+H	HexCer-NS(d18:2/18:2)+H	LPC(16:0)+H	LPC(16:0)+Na	LPC(16:1)+H	LPC(18:0)+H	LPC(18:0)+Na	LPC(18:1)+H	LPC(18:1)+Na	LPC(18:2)+H	LPC(20:3)+H	LPC(20:4)+H	LPC(20:5)+H	LPC(22:6)+H	MGDG(16:0_18:0)+Na	MGDG(16:0_20:0)+Na	MGDG(16:0_20:2)+Na	MGDG(18:0_18:0)+Na	OxLPC(18:3(OOO))+H	OxLPC(18:4(OOO))+Na	OxTG(16:0_18:1_16:1(CHO))+NH4	OxTG(16:0_18:1_16:1(OO))+NH4	OxTG(18:0_18:1_16:1(COOH))+NH4	OxTG(18:1_18:2_18:2(OOO))+NH4	OxTG(20:2(OOOO)_22:1(OOOO)_22:5)+NH4	PA(22:6_24:0)+H	PC(14:0_20:4)+H	PC(14:0_22:6)+H	PC(16:0_16:0)+H	PC(16:0_16:0)+Na	PC(16:0_16:1)+H	PC(16:0_18:0)+H	PC(16:0_18:1)+H	PC(16:0_18:2)+H	PC(16:0_20:1)+H	PC(16:0_20:3)+H	PC(16:0_20:4)+H	PC(16:0_20:5)+H
548	785640	1.09873e+06	1.4226e+07	4.26728e+07	453144	5.24751e+06	906762	259874	284393	456616	507456	3.52147e+06	358466	1.8337e+07	4.91882e+06	255197	7.38185e+06	2.59832e+06	3.24845e+06	1.06087e+06	4.17256e+06	263647	929125	763890	479608	1.14329e+07	5.50521e+06	2.21782e+06	1.15357e+07	154661	60313.5	114660	923578	234855	512203	754772	1.77938e+06	901208	1.1746e+06	6.08764e+06	958246	5.43406e+06	8.65484e+06	1.95726e+07	2.54842e+08	3.7718e+07	2.70119e+07	5.1134e+07	2.00491e+07
549	941699	352969	8.16551e+06	1.73841e+07	99233.8	1.16612e+06	1000	575298	472638	837095	762511	3.12083e+06	136835	1.18177e+07	4.41283e+06	227588	4.61888e+06	2.07038e+06	2.16422e+06	794347	2.67185e+06	345364	801556	426983	438447	9.16858e+06	6.1562e+06	2.70036e+06	1.06442e+07	171267	77222	229428	684030	183576	96532	673817	1.91023e+06	2.54592e+06	1.82671e+06	5.34026e+06	788254	7.82618e+06	1.16529e+07	2.43325e+07	2.35687e+08	3.41573e+07	4.08539e+07	6.38238e+07	2.58732e+07
550	744892	777738	1.33775e+07	3.4818e+07	102686	891064	66637.4	434886	439417	777209	855501	3.25501e+06	295765	3.24746e+07	8.30338e+06	397839	1.38101e+07	700294	4.44809e+06	1.4627e+06	4.42119e+06	366635	1.40261e+06	717476	519422	1.02651e+07	4.9469e+06	2.246e+06	1.16168e+07	226531	69823.1	193911	831462	235872	523030	733234	1.7167e+06	828724	1.30044e+06	5.29698e+06	756675	4.81391e+06	1.00566e+07	2.45898e+07	2.50422e+08	3.09618e+07	2.83096e+07	5.42417e+07	2.88447e+07
2	674525	445396	1.30532e+07	2.80343e+07	365552	4.27229e+06	134803	390584	290656	719030	581604	3.4621e+06	219743	27203638	6.66074e+06	387841	9.19304e+06	3.08161e+06	3.63447e+06	1.22073e+06	3.14983e+06	357433	1.23894e+06	448283	562165	9.83839e+06	5.87127e+06	2.473e+06	1.06197e+07	219389	97040.7	190342	875801	224459	206612	695468	1.86504e+06	1.28335e+06	1.49367e+06	4.90108e+06	697737	5.20609e+06	1.1429e+07	2.74199e+07	2.37161e+08	4.07309e+07	3.26352e+07	5.97665e+07	2.72995e+07
551	1.47925e+06	990022	2.23754e+06	1000	236383	671096	393835	10509.8	21576.6	124928	109213	4.15421e+06	42533.8	8.73676e+06	3.5523e+06	782234	3.19789e+06	1.98287e+06	4.42192e+06	2.0267e+06	7.27085e+06	1.3305e+06	5.44987e+06	1.55992e+06	1.79142e+06	4.46212e+06	5.18079e+06	990715	5.25385e+06	1.26047e+06	161037	12211.5	547439	228403	1.80461e+06	207878	4.55051e+06	273652	1000	8.47655e+06	929137	8.81696e+06	5.75884e+06	7.08687e+06	9.14371e+07	1.94579e+07	4.5612e+07	1.11821e+08	7.39829e+06
555	1.05411e+06	710103	1.08458e+07	2.73202e+07	537051	1.63575e+06	421126	199992	165530	374039	355991	2.29364e+06	134768	6.86935e+06	2.91213e+06	253170	2.79101e+06	1.42594e+06	2.20097e+06	763835	2.55391e+06	317402	715108	505805	511673	9.34487e+06	3.70752e+06	3.27144e+06	9.1227e+06	177938	51852.5	166461	770918	201067	386143	655334	2.02877e+06	2.3356e+06	1.82594e+06	6.5991e+06	1.11761e+06	7.00165e+06	1.36622e+07	2.06018e+07	2.239e+08	2.84053e+07	4.30167e+07	7.17657e+07	2.44469e+07
40	1.22441e+06	172275	1.12559e+07	2.80343e+07	472765	4.09706e+06	147217	181680	155675	381783	388348	1.8193e+06	160944	7.98315e+06	3.30267e+06	312562	2.39168e+06	1.5201e+06	2.16617e+06	708285	3.18586e+06	367683	719640	669821	499145	1.02234e+07	3.30052e+06	3.32673e+06	9.02582e+06	167925	56859.9	149309	1.03227e+06	246178	621094	732022	1.83725e+06	2.31289e+06	1.65737e+06	5.60596e+06	770826	9.50567e+06	1.60331e+07	2.1245e+07	241581182	3.39747e+07	5.42632e+07	7.34059e+07	2.55166e+07
562	1.01009e+06	1.61529e+06	1.94695e+07	3.58891e+07	868803	923425	1.01858e+06	353173	248371	547068	505248	3.07407e+06	234457	2.69285e+07	7.42127e+06	612190	8.8611e+06	3.37064e+06	4.33717e+06	1.45622e+06	5.28748e+06	528830	1.83264e+06	1.00536e+06	886605	9.75652e+06	6.06216e+06	2.81067e+06	1.02114e+07	358102	74051.5	163357	768132	191579	1.02072e+06	757388	1.97643e+06	2.62761e+06	1.82258e+06	5.1262e+06	777137	8.00957e+06	1.44525e+07	2.98642e+07	2.32741e+08	4.76698e+07	3.54469e+07	6.62409e+07	2.68241e+07
41	1.10816e+06	644367	1.25055e+07	3.30328e+07	900533	3.75486e+06	318732	224860	143654	375927	303070	3.83228e+06	217092	9.84109e+06	3.72096e+06	255020	4.23566e+06	1.97683e+06	2.62099e+06	793778	4.78741e+06	395014	540066	1.04446e+06	492021	1.01189e+07	2.47053e+06	2.68317e+06	1.03774e+07	130277	53542.4	163426	855059	189076	269074	753848	1.5947e+06	2.2547e+06	1.60012e+06	6.00772e+06	979893	8.16787e+06	1.36622e+07	2.24028e+07	2.47475e+08	3.90875e+07	5.59935e+07	6.20973e+07	2.69429e+07
556	1.29473e+06	1.62447e+06	8.56198e+06	6.57439e+06	1.01386e+06	9.41361e+06	1.2967e+06	33279.1	41474.9	169461	138954	5.00412e+06	78520.6	1.24557e+07	4.37932e+06	1.04931e+06	3.61144e+06	1.92158e+06	4.94532e+06	1.84784e+06	5.25781e+06	1.07125e+06	3.71263e+06	1.12338e+06	1.37265e+06	6.92575e+06	6.96923e+06	6.5363e+06	5.9148e+06	817196	37769.9	39293.6	677185	198087	1.71113e+06	326261	3.79925e+06	1.10709e+06	448617	9.71419e+06	1.42066e+06	1.65897e+07	1.60331e+07	1.01816e+07	1.32546e+08	3.10531e+07	6.01028e+07	112683814	1.10157e+07
564	1.01293e+06	497134	1.06731e+07	3.30328e+07	203871	4.83325e+06	162452	412064	372909	641388	694489	2.15325e+06	266231	1.72817e+07	5.66278e+06	286580	6.78074e+06	2.38564e+06	2.66004e+06	922044	3.85907e+06	282870	966975	733275	455011	1.1348e+07	3.30954e+06	3.14751e+06	1.08873e+07	216288	52606.5	220497	863661	187711	223898	807167	2.39969e+06	1.42968e+06	1.23825e+06	6.55567e+06	906118	5.45064e+06	1.0478e+07	1.84791e+07	2.69577e+08	2.63054e+07	3.7826e+07	6.98666e+07	2.89636e+07
43	1.66493e+06	276777	1000	1000	106589	7.88265e+06	1.22523e+06	30979.5	55949.5	167346	146801	4.17073e+06	46554	6.61668e+06	3.2143e+06	643089	3.2167e+06	1.70875e+06	2.59491e+06	1.07277e+06	3.78418e+06	567063	2.71004e+06	808709	908893	2.46817e+06	6.21506e+06	5.76788e+06	4.38963e+06	710492	361723	18990.9	594328	253774	2.66265e+06	118156	4.35768e+06	60699.2	3836.18	6.78111e+06	595792	5.56476e+06	5.98465e+06	5.50966e+06	5.99054e+07	1.80884e+07	2.89585e+07	8.51461e+07	1000
567	1.13559e+06	932438	1.24051e+07	2.18512e+07	598917	5.38632e+06	1000	1.46929e+06	1.14369e+06	2.38495e+06	2.32398e+06	3.97164e+06	164960	3.20835e+07	8.26258e+06	500924	8.71484e+06	3.01084e+06	2.57447e+06	921175	3.493e+06	396462	1.50141e+06	584958	640496	7.82274e+06	5.89735e+06	2.58135e+06	1.0394e+07	369074	66585.6	563026	314136	74293.2	818188	669719	2.45223e+06	3.29178e+06	2.08041e+06	5.21651e+06	788057	4.48534e+06	1.26913e+07	3.05074e+07	2.25373e+08	3.05966e+07	43232955	6.35648e+07	2.57543e+07
52	734924	937729	1.33077e+07	2.14353e+07	739028	5.13707e+06	1000	455949	301792	1.01051e+06	849914	3.60714e+06	166980	10027110	4.03063e+06	187791	4.18579e+06	1.73743e+06	2.11809e+06	710360	2.56673e+06	334514	644505	531763	443249	8.16354e+06	6.64701e+06	2.77266e+06	1.00839e+07	175222	99153.9	308776	716051	219335	545497	673082	2.10207e+06	1.72295e+06	1.41587e+06	4.32026e+06	513120	5.072e+06	1.18218e+07	2.85777e+07	215059165	4.43829e+07	3.82585e+07	6.77085e+07	2.39714e+07
566	1.4787e+06	1.83203e+06	1.68004e+07	4.01735e+07	1.19311e+06	2.96157e+06	695993	421618	326931	667849	635948	3.42759e+06	288420	2.55494e+07	6.61914e+06	433652	1.01165e+07	507742	3.47405e+06	1.14808e+06	3.61697e+06	421675	1.75533e+06	671517	722931	9.10735e+06	6.11652e+06	3.35683e+06	9.61039e+06	419360	52261.2	257009	720279	171703	2.08598e+06	676658	2.62069e+06	2.00584e+06	1.25316e+06	6.41769e+06	1.10619e+06	6.58611e+06	1.25655e+07	2.52973e+07	2.18006e+08	3.224e+07	3.13375e+07	7.54777e+07	2.07622e+07
575	1.46989e+06	1.45917e+06	1.86059e+07	4.98135e+07	1.6928e+06	2.24716e+06	991563	294011	240464	607359	630903	3.3608e+06	323913	1.10471e+07	3.89059e+06	265296	5.62589e+06	1.96191e+06	2.45962e+06	745805	2.88622e+06	325404	812286	609693	481405	8.5678e+06	9.43381e+06	3.09988e+06	1.06442e+07	232500	74316.8	232164	773030	183713	785210	676719	2.28732e+06	2.60757e+06	1.81677e+06	5.49609e+06	964132	6.60842e+06	1.09135e+07	2.53616e+07	2.06218e+08	3.36095e+07	3.32841e+07	6.8658e+07	2.32583e+07
573	1.94923e+06	1.1272e+06	1.38368e+07	4.05305e+07	848942	6.21459e+06	694289	375774	360525	752801	827096	3.74841e+06	274670	9.4151e+06	3.7842e+06	151656	2.88413e+06	1.35358e+06	1.43104e+06	442815	1.69016e+06	186019	257440	316824	274163	1.24435e+07	2.47682e+06	3.43387e+06	9.00812e+06	122240	34522.2	186762	777147	194147	1.18385e+06	871775	2.15686e+06	1.54167e+06	1.56528e+06	5.8896e+06	739093	7.72779e+06	1.50452e+07	1.64852e+07	2.81364e+08	2.17404e+07	5.42632e+07	7.41828e+07	2.92013e+07
124	918919	637196	1.41447e+07	29462408	515268	1.54563e+06	131967	385683	260563	665675	578324	1.78829e+06	181041	1.12892e+07	4.18915e+06	358682	2.64426e+06	1.28681e+06	2.2581e+06	712467	3.09529e+06	283122	726555	671361	415375	1.0746e+07	3.26275e+06	3.44436e+06	8.63064e+06	208909	75376.7	235462	788343	189326	1.00624e+06	788718	2.1876e+06	3.23693e+06	1.83194e+06	6.41649e+06	1.04356e+06	7125724	1.74161e+07	2.42038e+07	2.53369e+08	2.84966e+07	4.45306e+07	7.9794e+07	2.64675e+07
569	1.13927e+06	172727	5.79649e+06	2.08646e+07	1000	3.4771e+06	1000	200018	203826	364633	360122	3.15892e+06	192808	1.51292e+07	4.63638e+06	184951	9.27615e+06	3.27422e+06	3.73279e+06	1.02921e+06	1.72126e+06	242328	680080	260645	292045	1.17363e+07	6.38873e+06	3.78615e+06	9.7943e+06	147763	168193	173841	936904	319308	643846	610930	2.31789e+06	650251	661823	1.02953e+07	1.50563e+06	6.66369e+06	1.25607e+07	1.37193e+07	2.53369e+08	2.97749e+07	4.10702e+07	6.96939e+07	2.24263e+07
574	2.10919e+06	1.41218e+06	1.63142e+07	4.16016e+07	799481	1.69516e+06	1.3085e+06	663808	462721	1.18298e+06	1010049	2.5981e+06	376419	1.6389e+07	4.90788e+06	301336	5.96609e+06	2.1264e+06	2.54569e+06	704823	2.90227e+06	270820	688614	604480	680198	1.11155e+07	3.37563e+06	2.86196e+06	9.77341e+06	172278	47713.3	145474	657415	154995	1.49537e+06	789094	1.78876e+06	1.98488e+06	1.9855e+06	6.03058e+06	884555	7.5199e+06	1.50452e+07	2.13093e+07	2.57789e+08	3.71702e+07	4.04213e+07	6.37375e+07	2.11188e+07
249	1.46836e+06	1.70466e+06	1.85084e+07	4.98135e+07	1.00987e+06	1.72042e+06	1.38992e+06	380562	395233	730935	845069	3.78463e+06	338746	2.12092e+07	6.14019e+06	178722	1.02737e+07	478797	4.41887e+06	1.10811e+06	3.816e+06	406241	929629	769109	643359	9.89616e+06	6.61491e+06	2.34037e+06	1.15357e+07	227100	102642	150428	767892	222112	844964	746278	1.86517e+06	2.12473e+06	2.21188e+06	5.18725e+06	1.04208e+06	5.97451e+06	1.19854e+07	2.78702e+07	2.38634e+08	3.35182e+07	3.24189e+07	5.67452e+07	2.68241e+07
576	2.79175e+06	1.82573e+06	1.6804e+07	4.19587e+07	110064	3.10645e+06	316106	986841	629553	1.19682e+06	949648	2.61365e+06	348524	3.25404e+07	8.14228e+06	311419	1.21569e+07	2.88084e+06	4.24184e+06	1.04174e+06	3.82663e+06	263716	749542	692860	487369	1.21147e+07	5.20746e+06	1.98335e+06	1.2022e+07	146692	70744.9	253621	585367	125515	313108	901882	1.34821e+06	1.87856e+06	2.27574e+06	5.16854e+06	897618	5.22953e+06	1.52428e+07	3.66823e+07	2.88731e+08	4.40177e+07	3.0905e+07	5.14793e+07	3.19351e+07
579	1.17221e+06	746566	1.35181e+07	4.08876e+07	699540	4.20651e+06	338224	572906	622750	1.13611e+06	1.44939e+06	4.1872e+06	230660	1.17461e+07	3.96767e+06	105115	3.68648e+06	1.30364e+06	1.72906e+06	492956	2.09828e+06	205823	377261	435947	378867	1.31212e+07	2.27224e+06	3.07671e+06	1.03465e+07	145422	68945.7	134551	692777	203857	1.96896e+06	952384	2.07707e+06	1.08675e+06	1.40234e+06	6.71705e+06	891343	6.74414e+06	1.52428e+07	1.95726e+07	2.90205e+08	2.42055e+07	5.29656e+07	6.71905e+07	3.22917e+07
331	819299	2.04663e+06	2.1054e+07	3.4818e+07	705383	4.6228e+06	373399	1.11218e+06	581239	1.90394e+06	1.24659e+06	2.04468e+06	361034	2.21997e+07	6.74366e+06	249903	8.59841e+06	2.39181e+06	4.0762e+06	1.08083e+06	3.56803e+06	363738	850190	725751	530581	1.0994e+07	3.16445e+06	2.80607e+06	1.05778e+07	209405	49959.2	371209	619023	128741	724457	869150	1.75215e+06	1.9401e+06	1.84318e+06	5.62203e+06	923118	6.80488e+06	1.76137e+07	3.35306e+07	2.63683e+08	4.8948e+07	3.73934e+07	6.77085e+07	2.83693e+07
581	2.32225e+06	1.30393e+06	1.84784e+07	4.90994e+07	1.17985e+06	5.71691e+06	1.10069e+06	402125	288445	569564	562722	2.44036e+06	407619	3.76077e+07	9.51861e+06	427977	1.40295e+07	4.37169e+06	4.98732e+06	1.30047e+06	6.54536e+06	504869	1.19297e+06	1.39679e+06	801662	1.02825e+07	6.01831e+06	1.91831e+06	1.26704e+07	245258	70343	185510	734483	221313	1.49558e+06	805666	1.61873e+06	2.63355e+06	2.63307e+06	5.9428e+06	1.27835e+06	4.46355e+06	1.34646e+07	3.4817e+07	2.47475e+08	5.28739e+07	4.21516e+07	5.06161e+07	2.32583e+07
578	1.22329e+06	1.88921e+06	1.84111e+07	4.26728e+07	1.23273e+06	6.56919e+06	1.13341e+06	682099	492198	897509	857297	2.52199e+06	259020	2.63449e+07	7.54164e+06	381305	9.32624e+06	2.64913e+06	3.23454e+06	885821	4.02293e+06	472851	1.02783e+06	829882	843153	1.00682e+07	3.23633e+06	2.99556e+06	1.03873e+07	251616	64794	285706	664842	136012	1.28053e+06	739337	1.98454e+06	2.50004e+06	1.44956e+06	5.67006e+06	907400	9.13026e+06	1.48476e+07	2.80632e+07	2.35687e+08	4.14613e+07	4.36655e+07	6.95213e+07	1.96925e+07
583	1.13842e+06	1.65485e+06	1.92394e+07	4.87424e+07	1.2046e+06	1.28559e+06	171453	545483	489061	940910	949661	2.05507e+06	257717	1.24027e+07	4.24158e+06	304317	3.99863e+06	1.2806e+06	2.24175e+06	625010	4.14206e+06	374693	709669	967494	546684	1.13774e+07	6.2983e+06	2.7314e+06	1.06442e+07	206954	75389.3	207685	710700	191400	941705	945493	2.01574e+06	2.80509e+06	2.43517e+06	5.31672e+06	863710	7.33704e+06	1.66258e+07	3.16652e+07	2.72524e+08	4.47481e+07	4.53958e+07	6.76221e+07	2.9439e+07
332	1.75397e+06	1.69686e+06	4.21124e+06	335574	781405	8.89269e+06	1.55746e+06	18928.6	23163.4	139736	111108	5.95851e+06	64717.5	1.83048e+07	5.53208e+06	1.41365e+06	6.08109e+06	2.11108e+06	6.00103e+06	1.75978e+06	6.52934e+06	1.36357e+06	3.92646e+06	1.45539e+06	1.62696e+06	4.50184e+06	5.44888e+06	6.09419e+06	5.00967e+06	971867	292674	9197.41	429640	161491	1.62505e+06	179147	4.001e+06	302354	12191.1	8.67056e+06	1.10184e+06	1.09831e+07	1.21725e+07	6.50139e+06	8.2007e+07	2.9501e+07	6.09679e+07	9.05846e+07	1000
585	1.26882e+06	667173	1.45773e+07	4.80283e+07	1.05114e+06	1.40233e+06	1.07171e+06	327980	273212	536856	604797	2.42489e+06	362928	2.46356e+07	6.5751e+06	461484	7.184e+06	1.84015e+06	3.27814e+06	845014	5.31632e+06	399994	1.10205e+06	1.2048e+06	584232	1.24993e+07	3.38059e+06	3.70844e+06	9.81517e+06	302413	68377.5	383298	1.00643e+06	218301	1.00733e+06	903684	2.38961e+06	2.29439e+06	1.42531e+06	7.71792e+06	1.24644e+06	6.45807e+06	1.46501e+07	1.79002e+07	2.7547e+08	2.70358e+07	5.16679e+07	8.04846e+07	2.8607e+07
587	842515	1.48784e+06	1.9171e+07	3.66031e+07	1.01195e+06	1.25546e+06	910027	927843	489265	996482	712368	2.41973e+06	318996	4.50869e+07	1.0458e+07	833372	1.76969e+07	732711	5.63277e+06	1.3345e+06	5.35678e+06	537787	1.54627e+06	1.07636e+06	878662	1.07453e+07	3.64384e+06	3.58722e+06	9.8564e+06	349078	56202.8	171950	557480	137414	1.18765e+06	780573	1.90174e+06	3.86125e+06	1.82089e+06	5.15627e+06	772102	1.24536e+07	1.80089e+07	2.81275e+07	2.51895e+08	5.36956e+07	4.5612e+07	7.83264e+07	1.80284e+07
586	1.17388e+06	1.16308e+06	1.20463e+07	3.94594e+07	834147	3.6007e+06	147946	946510	772968	1.40489e+06	1.47795e+06	4.56103e+06	240086	9.84769e+06	3.60497e+06	167905	2.88888e+06	1.1219e+06	1.46032e+06	425423	2.30403e+06	252225	268387	534965	370974	1.39462e+07	2.23159e+06	3.19657e+06	1.00288e+07	130896	53781.1	194245	756679	160200	811411	1.00805e+06	2.06819e+06	1.42337e+06	1.60433e+06	6.6954e+06	830948	7.42014e+06	1.44525e+07	1.59706e+07	3.01992e+08	2.24708e+07	7.11331e+07	6.66726e+07	3.11031e+07
333	1.31973e+06	1.07216e+06	1.63227e+07	4.19587e+07	629253	6.00526e+06	561366	669693	544302	1.00945e+06	1.01548e+06	3.35048e+06	303249	2.40669e+07	7.16478e+06	248822	7.30701e+06	2.04038e+06	3.06585e+06	756871	2.53671e+06	275184	706582	506835	410399	1.33335e+07	3.06875e+06	3.90385e+06	9.69585e+06	221311	73540.2	261939	866149	214329	706234	932230	2.24615e+06	1.59414e+06	1.34249e+06	7.24086e+06	1.06805e+06	8.00972e+06	1.80089e+07	1.98299e+07	2.91678e+08	2.95923e+07	4.62609e+07	8.19521e+07	2.96767e+07
588	2.37293e+06	1.73313e+06	2.26271e+07	6.94505e+07	2.08377e+06	1.24641e+07	2.39136e+06	249138	161942	586505	458442	4.44107e+06	275816	5.52372e+07	1.33232e+07	717274	2.22346e+07	878333	7.6632e+06	2.00852e+06	9.60668e+06	692011	2.59979e+06	2.0208e+06	973063	1.07675e+07	7.0683e+06	2.59425e+06	1.17789e+07	513863	98103.8	137589	957794	256043	1.64478e+06	823143	2.40782e+06	3.10226e+06	1.74324e+06	5.42929e+06	850419	5.03146e+06	1.20866e+07	2.70983e+07	2.51895e+08	3.54355e+07	43232955	6.96939e+07	2.84881e+07
590	782140	1.78613e+06	1.56379e+07	3.37468e+07	860527	788506	1.94152e+06	397874	246227	699854	502260	3.9666e+06	416139	1.15762e+07	3.85141e+06	189672	3.32604e+06	1.1533e+06	2.02333e+06	470451	3.72791e+06	233049	422526	886891	405005	1.2189e+07	3.7366e+06	3.87559e+06	9.4129e+06	165931	86717.3	120868	748913	182506	2.50557e+06	822181	2.10741e+06	1.88871e+06	1.0029e+06	7.63458e+06	1.13894e+06	8.43253e+06	1.80089e+07	1.88651e+07	2.7105e+08	3.17835e+07	4.82074e+07	8.22974e+07	2.33771e+07
343	2.09345e+06	2.36555e+06	5.35027e+06	5.25795e+06	982770	9.80973e+06	1.52512e+06	19551.5	23439.6	128753	111539	5.67283e+06	86387.6	2.00354e+07	6.42648e+06	1.2075e+06	5.81718e+06	1.98876e+06	6.57693e+06	1.95921e+06	9.38108e+06	1.75152e+06	4.7315e+06	2.21041e+06	1.76431e+06	6.14603e+06	3.09459e+06	6.35807e+06	5.45927e+06	1.20737e+06	102408	16556.8	517556	182760	1.90545e+06	237525	3.84018e+06	385281	103468	9.42266e+06	1.25345e+06	1.10717e+07	1.36622e+07	7.63167e+06	1.11918e+08	2.67619e+07	7.13494e+07	9.80949e+07	1.04214e+07
596	846265	1.08612e+06	1.83018e+07	5.62401e+07	1.04737e+06	1.49884e+06	1.59427e+06	407331	399094	828325	926981	2.18785e+06	413421	2.25697e+07	6.6282e+06	343673	1.00488e+07	489893	3.14486e+06	718295	4.40006e+06	356244	666209	1.02594e+06	629491	1.12276e+07	3.44652e+06	2.43591e+06	1.14547e+07	208402	132407	268432	745856	164424	2.28798e+06	845432	1.99053e+06	2.22875e+06	1.39887e+06	5.4954e+06	813929	5.31859e+06	1.26513e+07	2.23385e+07	2.63683e+08	3.56181e+07	47342278	6.52914e+07	2.3496e+07
348	1.08735e+06	1.84363e+06	2.04109e+07	5.4455e+07	1.67441e+06	7.87524e+06	1.15485e+06	628042	408988	928435	776878	2.3702e+06	319319	4.66896e+07	1.14894e+07	703119	1.77255e+07	3.6452e+06	6.64497e+06	1.4987e+06	6.12407e+06	621254	1.84009e+06	1.27454e+06	815645	1.09778e+07	5.0014e+06	3.62827e+06	1.08063e+07	440418	51485.3	258999	773273	191145	992717	830717	2.28165e+06	2.97259e+06	1.93857e+06	6.34644e+06	1.10687e+06	7.81649e+06	1.52428e+07	2.5233e+07	2.56316e+08	4.21004e+07	4.69097e+07	8.11752e+07	2.68241e+07
598	1.7993e+06	2.33744e+06	2.04912e+07	5.12416e+07	1.07555e+06	9.20292e+06	956050	907825	613378	1.81453e+06	1.59271e+06	3.73309e+06	334273	1.85116e+07	5.54809e+06	108965	7.50438e+06	1.71547e+06	2.43117e+06	558927	1.98423e+06	199137	670466	424991	404636	1.04506e+07	6.73741e+06	3.08251e+06	1.0462e+07	233068	69959	249111	571323	148015	1.48649e+06	834178	2.44225e+06	1.10815e+06	1.24748e+06	5.30044e+06	822544	5.62136e+06	1.40573e+07	2.89637e+07	2.43055e+08	3.05966e+07	2.65794e+07	6.81401e+07	2.78938e+07
349	952941	1.78812e+06	1.76594e+07	4.19587e+07	860095	2.55964e+06	491065	735249	552137	1.42419e+06	1.25364e+06	3.74515e+06	354196	4.08131e+07	1.04669e+07	501355	1.23272e+07	2.48975e+06	4.72274e+06	1.17389e+06	5.39768e+06	427073	1.68891e+06	1.16503e+06	628657	1.18611e+07	3.6184e+06	4.05755e+06	9.52945e+06	434710	83081.4	306200	725228	171691	1.72734e+06	859034	2.70708e+06	1.6387e+06	1.18262e+06	5.99614e+06	782708	6.38355e+06	1.54404e+07	2.00872e+07	268103199	2.63967e+07	4.23678e+07	8.94624e+07	2.72995e+07
593	990583	1.26955e+06	1.74296e+07	5.19557e+07	1.48299e+06	2.21825e+06	1.01116e+06	737704	590354	890263	919407	4.05704e+06	238511	4.08131e+07	9.93911e+06	491794	1.37254e+07	537297	3.61128e+06	948917	5.91186e+06	472062	1.37755e+06	1.29289e+06	721871	1.1508e+07	3.18797e+06	3.105e+06	1.08873e+07	376215	72808.5	284983	622868	149136	2.01422e+06	864970	2.58774e+06	2.87059e+06	1.54145e+06	6.95913e+06	1.1269e+06	6.40034e+06	1.40573e+07	2.24028e+07	2.6663e+08	3.21487e+07	4.82074e+07	7.6082e+07	2.06434e+07
601	862530	2.12228e+06	1.82293e+07	4.74624e+07	373887	4.09844e+06	369233	620709	471606	873994	942218	2.66487e+06	299150	2.23074e+07	6.98248e+06	392062	9.46803e+06	1.58248e+06	3.97851e+06	1.30872e+06	3.83606e+06	300080	1.42631e+06	662696	527010	9.88256e+06	2.88492e+06	2.90933e+06	1.02547e+07	313698	157454	146381	827526	208000	520057	953020	2.35158e+06	1.17507e+06	1.86424e+06	6.88059e+06	1.12524e+06	3.05615e+06	1.34483e+07	2.69508e+07	2.46992e+08	3.2653e+07	2.54977e+07	5.89872e+07	2.92344e+07
603	1.7946e+06	1.9177e+06	1.5258e+07	3.89904e+07	1.00109e+06	4.94713e+06	1.8014e+06	464828	308222	774867	647728	4.22755e+06	143720	1.56924e+07	5.64253e+06	445657	4.80667e+06	784749	2.53358e+06	863733	3.60479e+06	351311	1.03237e+06	651894	742647	9.40784e+06	3.74919e+06	3.17474e+06	9.27857e+06	237312	247609	226600	678676	152540	2.04932e+06	739894	2.16353e+06	1.74317e+06	1.68976e+06	8.31565e+06	1.21483e+06	5.20856e+06	1.58044e+07	2.63483e+07	2.30486e+08	3.37328e+07	3.57094e+07	6.3291e+07	2.76587e+07
618	851493	873097	1.62484e+07	2.82079e+07	522957	3.01631e+06	1.26948e+06	264999	163803	385534	255838	2.34994e+06	294529	1.51632e+07	5.29525e+06	374222	5.53923e+06	2.53485e+06	3.50025e+06	1.02444e+06	3.90761e+06	312360	725879	769505	514229	1.18721e+07	2.92489e+06	3.45524e+06	9.30345e+06	163911	72291.3	134031	750133	217765	783686	725581	1.63523e+06	1.92583e+06	1.0972e+06	7.26867e+06	1.10057e+06	8.60807e+06	17292510	2.43401e+07	253340394	4.64948e+07	4.42191e+07	6.43037e+07	1.96677e+07
350	1.62877e+06	771974	9.5136e+06	2.91707e+07	922169	1.46922e+06	184339	336948	361257	425831	527361	3.03608e+06	174246	4.05672e+06	2.86733e+06	342086	2.0968e+06	602529	1.63898e+06	588049	2.84031e+06	412353	355099	573755	432754	1.21373e+07	3.12565e+06	3.14863e+06	7.85145e+06	94313.1	56443.4	119181	825439	178315	187792	635513	1.52276e+06	1.91654e+06	854984	4.43224e+06	778642	1.0775e+07	1.54324e+07	2.23318e+07	2.49531e+08	3.08859e+07	6.937e+07	5.05062e+07	2.91219e+07
615	2.39388e+06	191122	1000	1000	1.39985e+06	6.87139e+06	775571	1000	4334.64	1000	4909.61	3.27198e+06	56845.5	1.60295e+06	2.10573e+06	732776	1.59001e+06	1.54503e+06	2.50456e+06	1.15952e+06	3.98337e+06	1.24665e+06	4.08894e+06	852876	1.11891e+06	1.85359e+06	3.20926e+06	4.75176e+06	1.90511e+06	1.06427e+06	319770	15369.6	625109	271796	2.52995e+06	1000	4.02843e+06	1000	452805	7.45474e+06	1.05143e+06	4.67544e+06	3.66501e+06	1000	1000	1.6455e+07	2.51195e+07	6.43037e+07	7.19677e+06
622	894811	990893	1.84273e+07	4.5537e+07	1.19904e+06	3.52542e+06	1.02027e+06	477255	523596	543682	707097	4.45467e+06	106819	9.60655e+06	3.83264e+06	223362	4.27133e+06	2.44493e+06	1.88937e+06	609796	2.92723e+06	287702	464673	566577	507344	1.10763e+07	6.89278e+06	3.11691e+06	1.10165e+07	122720	54692.1	215782	578784	138658	1.2618e+06	841717	1.73532e+06	2.46085e+06	1.64142e+06	8.90806e+06	1.28107e+06	9.37221e+06	1.49364e+07	2.45409e+07	2.46992e+08	3.74633e+07	5.89692e+07	5.8734e+07	2.82215e+07
625	1.18567e+06	102859	8.52319e+06	2.82079e+07	532661	2.30396e+06	554181	336308	301289	474803	450797	2.14696e+06	157459	7.75434e+06	3.20851e+06	119355	3.29296e+06	734498	2.18505e+06	659701	3.43877e+06	312717	611579	713313	474096	1.16068e+07	3.51793e+06	3.45918e+06	8.39468e+06	161916	76298.8	179967	839850	205566	379550	671968	1.8329e+06	1.57494e+06	2.03054e+06	7.08073e+06	1.0791e+06	7.81045e+06	1.40683e+07	2.17293e+07	2.45722e+08	2.64683e+07	4.30845e+07	5.96201e+07	2.91641e+06
624	516726	2.65964e+06	2.51622e+07	4.61146e+07	869410	5.25903e+06	1.15271e+06	367216	184836	780370	523492	2.84773e+06	336245	1.4634e+07	4.91344e+06	401584	6.91489e+06	1.08256e+06	5.04011e+06	1.36897e+06	7.88612e+06	585210	1.20929e+06	1.83311e+06	816038	8.84608e+06	4.00282e+06	2.9517e+06	1.15606e+07	244772	77441.4	157079	785729	216075	874349	739558	1.6387e+06	3.20106e+06	2.03168e+06	4.53917e+06	988195	4.70995e+06	1.51844e+07	3.19714e+07	2.31755e+08	6.14166e+07	3.43856e+07	5.8734e+07	2.61956e+07
630	1.10536e+06	1.82824e+06	1.84273e+07	3.37917e+07	608894	1.40727e+06	266225	879882	553131	1.2297e+06	907140	3.60351e+06	352706	2.36304e+07	6.9782e+06	185497	9.92049e+06	3.40167e+06	4.01691e+06	1.14073e+06	2.18525e+06	358210	947268	303684	525899	1.06784e+07	5.71809e+06	3.46895e+06	1.09077e+07	229218	95758.9	226658	644724	163385	985538	753619	1.74028e+06	1.52327e+06	1.53679e+06	7.96706e+06	920427	9.45989e+06	1.33243e+07	2.51434e+07	2.45722e+08	3.94266e+07	4.62992e+07	6.68353e+07	2.73211e+07
627	1.4983e+06	1.41307e+06	1.64465e+07	3.0711e+07	457343	2.0165e+06	431591	525567	331473	1.22923e+06	945700	2.96597e+06	219837	5.90213e+06	2.93753e+06	182059	3.41156e+06	908247	1.94169e+06	616416	2.14935e+06	181674	489782	384078	370695	1.06784e+07	2.69191e+06	3.07463e+06	1.04724e+07	136856	244685	316815	782695	191869	1.75621e+06	883004	1.86394e+06	1.0912e+06	1.51414e+06	5.26821e+06	970590	7.90143e+06	1.45644e+07	2.69508e+07	252070686	3.58926e+07	3.40074e+07	6.96201e+07	2.87842e+07
447	1.25842e+06	1.67867e+06	1.24848e+07	4.90028e+07	611829	6.77781e+06	960749	214848	202169	388841	434616	2.55451e+06	241593	4.36197e+06	2.69657e+06	93822.7	3.51982e+06	2.21768e+06	2.47211e+06	739392	2.43672e+06	261025	612242	452788	401455	1.0811e+07	6.69673e+06	3.65887e+06	1.10165e+07	154016	167076	200229	990284	249422	317447	744014	2.38185e+06	1.66696e+06	1.7952e+06	6.24777e+06	667110	6.62561e+06	1.20842e+07	2.2131e+07	2.45722e+08	3.17694e+07	3.89241e+07	7.0886e+07	2.67583e+07
632	903385	1.06203e+06	1.62484e+07	3.95681e+07	626481	3.60527e+06	1.24047e+06	248000	182726	461535	404971	2.72547e+06	137580	2.36304e+07	6.65871e+06	293073	8.64754e+06	3.98208e+06	4.26363e+06	1.2228e+06	5.35488e+06	394044	1.09219e+06	1.11928e+06	649720	1.20047e+07	3.435e+06	3.2143e+06	1.05812e+07	228606	78162.1	153791	984848	258835	1.1709e+06	707261	1.76046e+06	859293	602579	4.35753e+06	838679	5.84961e+06	1.28283e+07	2.31351e+07	2.60959e+08	4.07029e+07	4.21389e+07	5.56961e+07	2.51826e+07
635	2.6873e+06	959997	1.12964e+07	4.47668e+07	1.28532e+06	9.57649e+06	1.06383e+06	223905	257315	481056	596758	3.57683e+06	218445	1.35756e+07	4.20984e+06	204884	6.18748e+06	1.14873e+06	2.46588e+06	739850	4.08014e+06	421594	1.27124e+06	882135	580710	9.74992e+06	4.26976e+06	4.04255e+06	1.01459e+07	320036	65029.8	85880.6	869301	217523	1.75673e+06	757856	3.19098e+06	3.3455e+06	1.78519e+06	6.61444e+06	707963	6.65731e+06	1.15882e+07	2.11269e+07	2.29216e+08	2.58793e+07	5.23506e+07	9.72152e+07	2.63081e+07
477	1.67628e+06	1.11274e+06	1.48618e+07	4.68848e+07	852337	7.75452e+06	2.14438e+06	201766	168341	384204	361746	3.45305e+06	219648	1.04003e+07	3.89257e+06	346877	3.7556e+06	736272	2.08912e+06	662934	3.06794e+06	248553	591172	643400	494780	1.09436e+07	6.75583e+06	3.56206e+06	9.47735e+06	143630	85451.9	149630	785112	183202	1.40774e+06	742293	1.90254e+06	2.3503e+06	1.3454e+06	7.53917e+06	906668	8.3662e+06	1.45644e+07	2.2131e+07	2.43183e+08	3.02969e+07	4.62992e+07	6.73417e+07	1.78669e+07
631a	866591	1.80843e+06	21002425	3.18663e+07	852335	3.18313e+06	517441	618054	352472	1.3126e+06	861278	2.80721e+06	277503	1.17234e+07	4.13695e+06	376012	5.89311e+06	1.02694e+06	2.89496e+06	842536	2.66118e+06	274324	665402	504540	441945	8.12041e+06	7.03582e+06	3.06316e+06	1.069e+07	158661	76247.9	379503	544954	149804	929008	658933	2.06097e+06	1.70229e+06	1.98945e+06	6.16318e+06	1.10031e+06	4.62701e+06	1.46884e+07	2.83565e+07	2.01282e+08	4.53168e+07	3.60876e+07	6.35442e+07	2.40571e+07
637	1.28711e+06	909854	1.7635e+07	2.08912e+07	1.51892e+06	2.13967e+06	118960	1.72501e+06	864826	1.28903e+06	701059	5.04788e+06	224542	4.61215e+07	1.14895e+07	535332	1.61511e+07	2.1946e+06	5.13336e+06	1.7002e+06	5.26795e+06	1.05247e+06	2.44966e+06	972623	1.15823e+06	8.62496e+06	8.25788e+06	3.97557e+06	9.25009e+06	575730	56926.8	283510	378241	74003	259862	635174	2.14048e+06	4.39469e+06	1.68736e+06	6.78529e+06	1.09846e+06	1.71752e+07	1.84086e+07	2.29343e+07	1.98743e+08	5.47411e+07	6.78572e+07	9.03797e+07	2.28191e+07
638	1.19643e+06	926025	1.64465e+07	5.26611e+07	1.07763e+06	3.55756e+06	507618	668969	658974	1.07009e+06	1.41008e+06	4.50288e+06	272778	3.65958e+07	9.19968e+06	657158	1.02563e+07	1.3694e+06	3.50051e+06	1.03665e+06	4.30974e+06	368880	1.36519e+06	776518	635662	1.05457e+07	2.76835e+06	416904	9.77244e+06	319040	96600.9	375254	692613	167958	1.05455e+06	989368	2.24137e+06	1.37515e+06	1.91656e+06	7.24643e+06	1.09311e+06	2.30102e+06	1.04722e+07	2.53442e+07	2.66037e+08	2.21488e+07	4.64883e+07	5.68353e+07	2.96846e+07
640	1.08036e+06	928797	1.44657e+07	4.47668e+07	1.02951e+06	6.9756e+06	1.36862e+06	343187	311222	698960	748903	3.61208e+06	171888	8.01894e+06	3.07827e+06	224376	2.83873e+06	1.42751e+06	1.66664e+06	516852	2.19271e+06	236006	678763	424725	520794	1.0811e+07	6.73809e+06	4.23561e+06	1.00371e+07	196223	84450.8	182634	784932	199379	2.30372e+06	787428	2.91153e+06	2.63517e+06	2.22056e+06	7.09944e+06	808375	6.56382e+06	1.38203e+07	2.35368e+07	2.5461e+08	2.745e+07	4.80012e+07	9.62025e+07	2.79964e+07
642	768560	265233	1.58523e+07	2.82079e+07	132036	834246	517173	587064	378336	1.14657e+06	880246	1.93255e+06	419100	2.23074e+07	6.27118e+06	459739	6.88381e+06	3.0726e+06	4.30751e+06	1.1527e+06	5.09799e+06	243891	872485	1.10409e+06	613358	1.16068e+07	6.40065e+06	2.94318e+06	1.02547e+07	179152	37152.7	328747	710778	214485	1.97078e+06	744081	1.49783e+06	915490	1.13828e+06	6.78526e+06	1.03246e+06	6.12796e+06	1.50604e+07	2.35368e+07	2.5715e+08	3.3242e+07	2.62541e+07	5.01264e+07	2.6083e+07
486	1.28315e+06	1.4002e+06	2.0012e+07	3.4947e+07	912919	1.84732e+06	346697	567134	324863	1.66053e+06	1.02751e+06	3.76227e+06	368919	1.88676e+07	5.82501e+06	392343	5.26053e+06	884766	3.3818e+06	975274	2.80613e+06	321715	848361	536703	497147	1.01478e+07	6.98963e+06	3.53209e+06	9.51489e+06	216755	66060.2	236551	733838	188518	1.00991e+06	782586	1.97244e+06	1.45948e+06	2.09444e+06	5.45768e+06	987168	7.49053e+06	1.84086e+07	2.59466e+07	2.48262e+08	3.80523e+07	4.55428e+07	7.89873e+07	2.74336e+07
641	1.07661e+06	950176	1.44657e+07	4.41892e+07	366375	3.67175e+06	539301	558714	470000	982026	1.1001e+06	3.53609e+06	337477	2.62764e+07	7.11578e+06	194233	1.74045e+07	2.3275e+06	6.34523e+06	1.54978e+06	4.18115e+06	444272	1.51922e+06	803889	767925	1.01478e+07	6.21328e+06	3.37735e+06	1.39548e+07	360361	66623.7	99514.8	799038	242247	2.09271e+06	733840	2.17944e+06	1.26683e+06	1.45289e+06	5.08267e+06	589665	7.12989e+06	9.72813e+06	2.47417e+07	2.5461e+08	5.00289e+07	3.24946e+07	7.13923e+07	7.30582e+06
645	1.42918e+06	1.04433e+06	9.11744e+06	1.99285e+07	930637	1.58735e+06	1000	699831	714937	1.28202e+06	1.6751e+06	5.08785e+06	172513	2.46888e+07	6.61548e+06	213017	1.02885e+07	1.76226e+06	2.62634e+06	814091	2.85647e+06	477099	1.7509e+06	518457	706668	1.02805e+07	4.91116e+06	4.76377e+06	9.52103e+06	478436	136048	284207	719226	166239	1.01478e+06	623394	4.2082e+06	1.09252e+06	592269	4.90544e+06	678714	5.78015e+06	9.85213e+06	1.95203e+07	222867403	2.87262e+07	4.80012e+07	1.07722e+08	2.24814e+07
646	1.0758e+06	1.66291e+06	1.66446e+07	3.57172e+07	1.15187e+06	5.63312e+06	978119	437434	337378	540898	495608	5.1939e+06	270952	3.1833e+07	8.19962e+06	528720	9.55715e+06	3.50141e+06	4.86532e+06	1.25775e+06	4.73741e+06	593914	1.5491e+06	981090	818918	1.01478e+07	6.36659e+06	457681	9.23795e+06	371644	35024.7	195013	691071	171591	529038	671359	2.35584e+06	2.19405e+06	1.97774e+06	8.31437e+06	1.22295e+06	8.08773e+06	1.33243e+07	1.99219e+07	2.19058e+08	2.64683e+07	5.40525e+07	7.70885e+07	2.49575e+07
648	1.53813e+06	1.66692e+06	1.44657e+07	4.90028e+07	288824	4.40341e+06	1.34824e+06	606282	526193	653635	811569	2.18606e+06	692130	6.19975e+07	1.49098e+07	604363	3.02514e+07	3.23038e+06	8.91339e+06	2.47018e+06	9.17099e+06	705681	3.25866e+06	1.71458e+06	1.54282e+06	1.10763e+07	8.27189e+06	3.19851e+06	1.23224e+07	670559	55958.9	118816	780498	205726	2.38433e+06	733962	2.01451e+06	1.64646e+06	1.30138e+06	6.73245e+06	1.02549e+06	5.29905e+06	1.12162e+07	2.35368e+07	2.60959e+08	3.18676e+07	3.17382e+07	5.81011e+07	2.77713e+07
649	2.76992e+06	1.86904e+06	1000	1000	2.63387e+06	1.46561e+07	2.71777e+06	33241.6	49251.9	4792.98	44968.5	6.2997e+06	86633	2.97162e+07	7.44816e+06	1.87042e+06	1.06372e+07	4.20676e+06	6.29064e+06	2.11202e+06	8.93464e+06	1.92974e+06	6.80801e+06	1.96628e+06	2.24514e+06	1.4054e+06	7.53085e+06	4.90415e+06	3.99774e+06	1.60549e+06	96827	24041.7	540964	181007	2.07224e+06	1000	4.67102e+06	139842	395186	6.98569e+06	965739	4.61813e+06	5.39978e+06	1000	1000	2.40141e+07	2.58759e+07	7.55695e+07	6.29186e+06
647	1.25029e+06	754885	1.18906e+07	2.60899e+07	94109.3	1.38732e+06	425244	610099	361181	899918	669601	2.14358e+06	475934	3.36852e+07	8.97489e+06	381477	1.00185e+07	3.59215e+06	4.42767e+06	1.24146e+06	3.58287e+06	307981	1.29156e+06	685238	636030	1.06784e+07	8.07033e+06	3.62229e+06	1.05812e+07	302709	74405.1	117732	583808	175415	2.29189e+06	688148	2.01317e+06	1.78484e+06	1.14448e+06	9.6696e+06	1.24867e+06	7.07028e+06	1.58044e+07	2.31351e+07	2.35564e+08	3.66779e+07	3.23055e+07	7.51898e+07	2.65332e+07
516	1.21348e+06	1.61257e+06	1.24848e+07	2.97483e+07	548809	2.68041e+06	110037	438373	376000	885425	931653	3.95163e+06	286973	1.14588e+07	3.64839e+06	168670	4.98425e+06	2.41113e+06	1.43507e+06	465281	1.70129e+06	123153	575923	262254	230944	1.13415e+07	6.26876e+06	4.4267e+06	1.11253e+07	164452	109368	314986	796027	177962	960413	781781	3.40582e+06	1.0285e+06	438964	5.89232e+06	674405	5.84787e+06	1.10922e+07	2.33359e+07	2.40643e+08	2.77445e+07	4.44082e+07	9.50632e+07	2.39446e+07
650	1.97752e+06	1.24407e+06	1.2881e+07	5.42015e+07	1.05604e+06	8.38765e+06	604133	187068	169690	286421	339231	3.97645e+06	259603	3.36852e+07	8.4879e+06	601450	9.32363e+06	1.34365e+06	3.51153e+06	923581	4.36333e+06	445755	1.41215e+06	907325	506579	1.24026e+07	3.2279e+06	501353	9.11059e+06	345156	42704.6	147189	931518	226709	831226	930321	2.67754e+06	2.00771e+06	682225	7.59042e+06	1.12393e+06	7.40387e+06	1.30763e+07	2.47417e+07	2.71116e+08	2.29342e+07	5.8591e+07	8.48101e+07	2.24814e+07
543	1.1434e+06	1.01931e+06	1.32772e+07	3.45619e+07	861714	1.86339e+06	161337	421624	478070	946425	1.06631e+06	3.20072e+06	227706	1.01357e+07	3.7681e+06	322149	2.90996e+06	675457	1.311e+06	455750	1.55556e+06	192951	380056	273474	299230	1.16068e+07	5.99007e+06	3.80654e+06	9.45006e+06	111435	57744.2	126487	707464	191706	1.34517e+06	790758	2.15822e+06	1.86013e+06	2.58783e+06	4.89554e+06	923269	9.28454e+06	1.55564e+07	2.29343e+07	2.58419e+08	2.63701e+07	5.63218e+07	7.27847e+07	2.92344e+07
653	1.26397e+06	529433	1.2881e+07	4.68848e+07	617635	6.63842e+06	1.60766e+06	264483	270051	496460	655223	2.36471e+06	208921	2.36304e+07	6.16185e+06	245514	8.53508e+06	2.96934e+06	3.33764e+06	902364	3.02488e+06	267227	1.23083e+06	609005	741325	1.14742e+07	3.21779e+06	3.87287e+06	9.12895e+06	311420	38705.2	138899	916482	229091	1.103e+06	678757	2.70758e+06	1.27126e+06	940032	6.20159e+06	1.04214e+06	5.59641e+06	1.08442e+07	2.19302e+07	2.36834e+08	2.50939e+07	2.85234e+07	7.3291e+07	2.73211e+07
654	2.05288e+06	1.45731e+06	1.12964e+07	3.93755e+07	741013	2.44436e+06	378296	206662	179994	421749	404465	3.10515e+06	264511	1.4634e+07	4.40662e+06	410174	4.39122e+06	1.85272e+06	2.48853e+06	695431	3.13855e+06	309691	442244	699679	375720	1.14742e+07	3.23457e+06	3.2744e+06	8.92033e+06	127429	66299.1	160110	876165	239150	129708	710658	1.72998e+06	2.09393e+06	937888	5.51871e+06	705480	7.7332e+06	1.53084e+07	2.19302e+07	2.45722e+08	3.49109e+07	5.40525e+07	5.58226e+07	2.77713e+07
660	1.51469e+06	1.86631e+06	1.42676e+07	3.9183e+07	1.14783e+06	7.66306e+06	888974	364477	241810	490480	396033	3.53798e+06	292429	2.49534e+07	6.13978e+06	499252	8.62705e+06	2.81064e+06	3.35501e+06	845079	3.43165e+06	458639	1.2977e+06	691066	608049	9.15209e+06	4.92325e+06	4.36495e+06	8.39097e+06	331746	37078.8	235494	604924	133596	691575	517376	2.85204e+06	3.30621e+06	2.24154e+06	6.48178e+06	653961	8.39941e+06	1.40683e+07	1.7512e+07	2.02552e+08	3.61871e+07	4.34627e+07	9.48101e+07	2.34944e+07
604	1.0728e+06	513251	1.50599e+07	2.66676e+07	777178	1000	1000	729384	655561	1.38129e+06	1.36256e+06	3.91487e+06	237919	2.2572e+07	5.86512e+06	250550	7.76493e+06	1.19191e+06	2.75121e+06	757288	3.26679e+06	419563	537616	681806	365869	1.0811e+07	4.7763e+06	2.7302e+06	1.01459e+07	125515	55289.7	243079	637845	178916	270201	878105	1.35743e+06	1.10095e+06	435108	3.10876e+06	509026	8.51246e+06	1.55564e+07	2.45409e+07	2.69847e+08	3.68742e+07	5.23506e+07	4.73416e+07	2.82215e+07
658	1.34965e+06	358597	1.20887e+07	4.9773e+07	432577	6.62972e+06	1.12163e+06	97055.3	173082	201345	417314	2.60982e+06	176160	2.99808e+07	7.72005e+06	381972	1.16396e+07	1.41626e+06	4724735	1.20816e+06	5.76303e+06	397480	1.2526e+06	1.25082e+06	640067	1.20047e+07	6.01343e+06	3.46556e+06	1.05812e+07	299664	36359.1	110773	922604	284257	515477	684898	1.89755e+06	2.07955e+06	1.07303e+06	4.23125e+06	611463	6.15229e+06	1.25803e+07	2.29343e+07	2.60959e+08	3.30456e+07	3.8735e+07	6.01265e+07	2.77298e+06
674	1.1543e+06	1.13049e+06	1.44657e+07	3.82203e+07	537352	2.10815e+06	323242	445903	425847	694546	784812	2.74588e+06	300857	4.26817e+07	1.01019e+07	772794	1.18155e+07	3.48064e+06	3.71251e+06	1.01202e+06	4.32219e+06	388605	1.36236e+06	924663	643808	1.28005e+07	3.37194e+06	3.53408e+06	9.72564e+06	330252	54814.8	119483	825628	190503	735817	804382	2.42522e+06	1.34987e+06	2.08449e+06	4.9019e+06	899890	7.32105e+06	1.19602e+07	2.69508e+07	2.83813e+08	2.52903e+07	4.06261e+07	6.81012e+07	3.04725e+07
678	1.12622e+06	1.72998e+06	1.80312e+07	5.47791e+07	1.48391e+06	9.68457e+06	1.204e+06	146370	106531	327688	300370	3.8792e+06	355265	2.89224e+07	7.39752e+06	497294	9.58572e+06	3.82877e+06	3.42431e+06	941095	4.86606e+06	540580	1.19344e+06	1.1212e+06	553562	1.01478e+07	6.87614e+06	4.09311e+06	1.05812e+07	309381	36003.2	125039	817521	244771	929760	732012	2.72178e+06	3.35247e+06	1.14666e+06	4.25079e+06	907041	7.34427e+06	1.27043e+07	2.13277e+07	2.35564e+08	3.57944e+07	6.80463e+07	8.98734e+07	2.68709e+07
680	1.32872e+06	1.5147e+06	1.34753e+07	3.35992e+07	228302	4.82168e+06	700778	355840	197298	662454	463897	1.66629e+06	339896	3.34206e+07	7.97411e+06	415628	9.39264e+06	1.06525e+06	3.62513e+06	993111	4.54419e+06	284029	1.56574e+06	1.02751e+06	540901	1.18721e+07	3.39191e+06	4.59989e+06	1.02547e+07	405280	39332.1	121718	871352	179753	535836	728944	3.1203e+06	1.62515e+06	730214	6.24237e+06	1.00014e+06	6.10992e+06	1.34483e+07	2.41392e+07	2.5461e+08	3.82486e+07	3.15491e+07	1.01392e+08	2.6083e+07
682	1.04072e+06	572488	1.20887e+07	1.47298e+07	1000	205576	1000	1.19135e+06	1.1587e+06	2.24454e+06	2.31938e+06	1.88693e+06	262253	2.70702e+07	6.6304e+06	485661	6.94331e+06	1.00419e+06	3.38031e+06	847086	5.97683e+06	304776	952850	1.42984e+06	645148	1.25352e+07	3.13324e+06	3.35228e+06	9.72668e+06	228755	45657.2	451908	434168	119801	1.07404e+06	901846	1.75777e+06	1.75417e+06	1.08466e+06	7.33956e+06	1.06875e+06	6.99517e+06	1.69205e+07	2.87582e+07	2.88892e+08	3.37328e+07	3.57094e+07	6.65822e+07	2.3832e+07
617	898182	1.35605e+06	1.54561e+07	3.78352e+07	416715	2.68179e+06	6708.08	832240	505807	1.34394e+06	1.09399e+06	3.38181e+06	319557	4.45339e+07	1.01208e+07	345742	1.58378e+07	5.52572e+06	5.17711e+06	1.31479e+06	6.99676e+06	487092	1.85104e+06	1.58224e+06	672083	1.00152e+07	6.32242e+06	483232	1.29754e+07	422512	44978.1	498512	639536	156753	832551	834117	2.48031e+06	1.63511e+06	1.21269e+06	5.10258e+06	594901	6.09668e+06	1.19602e+07	2.5545e+07	2.68577e+08	4.43351e+07	3.81677e+07	8.05062e+07	4.77432e+06
686	1.29064e+06	1.09145e+06	1.12069e+07	4.22591e+07	422021	5.70329e+06	673983	176301	213402	338791	424397	2.39863e+06	243659	1.72327e+07	5.47504e+06	262445	8.87677e+06	1.87001e+06	3.44235e+06	927674	3.49519e+06	305578	1.06432e+06	625630	404332	1.12201e+07	1.38715e+06	3.3231e+06	1.00129e+07	260329	172616	114256	864364	202071	411894	749102	2.49379e+06	1.76485e+06	1.56989e+06	4.89218e+06	723488	5.34263e+06	1.08354e+07	2.56022e+07	2.56845e+08	3.34427e+07	3.61503e+07	7.27488e+07	2.48746e+07
684	1.19811e+06	917138	1.71599e+07	3.15857e+07	524780	1.06341e+06	355658	627557	367272	769039	571188	3.69495e+06	231279	4.24992e+07	1.11529e+07	286538	1.50769e+07	2.94383e+06	5.81772e+06	1.59023e+06	3.66673e+06	477265	1.36925e+06	566206	751905	1.15791e+07	2.36284e+06	2.97072e+06	9.4269e+06	322630	54335.2	228591	851798	195746	405619	710352	1.80152e+06	920649	1.54179e+06	6.4316e+06	903774	7.58158e+06	1.55393e+07	2.66522e+07	2.63772e+08	4.32948e+07	4.67976e+07	5.71164e+07	2.63514e+07
628	2.07555e+06	540313	7.23827e+06	2.57638e+07	599295	1.1368e+06	189675	409892	538759	740127	1.08241e+06	824245	162655	1.27491e+06	2.61718e+06	260350	427483	1000	1.04487e+06	499438	2.8154e+06	333370	540902	564061	449727	1.19382e+07	2.09458e+06	4.1667e+06	7.56963e+06	137181	57467.3	218406	909536	205274	1.05559e+06	602687	2.15056e+06	1.64745e+06	1.07877e+06	6.49924e+06	823620	8.57483e+06	1.38984e+07	2.41323e+07	2.42991e+08	2.03737e+07	5.92628e+07	7.90017e+07	3.04125e+07
723	1.03667e+06	1.01342e+06	1.7904e+07	3.74076e+07	807818	7.26923e+06	1.65085e+06	253485	163013	555139	397506	3.05076e+06	255364	1.19134e+07	4.32525e+06	306248	4.12789e+06	1.55094e+06	2.44395e+06	804296	2.78679e+06	321201	868920	546997	559974	1.07414e+07	6.72556e+06	4.12626e+06	9.81754e+06	220456	45407.9	124424	798008	192580	1.75093e+06	794978	2.40283e+06	2.66104e+06	2.48993e+06	6.21066e+06	1.16146e+06	8.80314e+06	1.65239e+07	25182227	2.49918e+08	3.99772e+07	3.74488e+07	9.15076e+07	1.76138e+07
631	1.01506e+06	678343	1.12069e+07	2.60063e+07	934662	1000	1000	835819	743243	1.54126e+06	1.6161e+06	4.31786e+06	196875	9.51977e+06	3.71614e+06	187286	2.9195e+06	1.18602e+06	1.69332e+06	587671	3.10324e+06	386589	515583	549825	452370	1.0143e+07	4.93882e+06	2.18157e+06	9.52456e+06	132911	63266.9	369983	625136	162113	709857	806786	1.57073e+06	1.8875e+06	1.75386e+06	6.23877e+06	768375	7.57183e+06	1.51018e+07	2.58122e+07	2.49918e+08	3.65592e+07	7.12086e+07	5.37494e+07	2.83204e+07
693	1.62059e+06	942984	9.96672e+06	5.36603e+07	300438	7.41266e+06	1.02715e+06	162441	353865	360886	728475	2.61045e+06	453837	2.41477e+07	6.82179e+06	354224	1.0739e+07	3.79072e+06	3.59417e+06	995727	4.24591e+06	281144	1.07581e+06	838302	551562	1.08611e+07	6.35241e+06	3.80807e+06	1.27474e+07	251417	103052	89082.4	854120	272173	1.32566e+06	752774	3.3903e+06	1.78948e+06	1.30998e+06	6.28946e+06	989846	4.51127e+06	8.6567e+06	2.53922e+07	2.51072e+08	3.09294e+07	2.80999e+07	8.52547e+07	2.16749e+07
656	1.43613e+06	681090	8.97456e+06	3.35263e+07	381489	1000	1000	651407	837504	1.03178e+06	1.41148e+06	3.39358e+06	206716	8.45592e+06	3.66139e+06	183449	6.79464e+06	483013	1.79338e+06	572346	1.50032e+06	261939	260277	317989	242586	1.11004e+07	2.97789e+06	1.90309e+06	1.21614e+07	94106.6	33489	183530	714164	181336	578516	765036	1.81419e+06	1.14177e+06	540495	4.94032e+06	946467	7.17178e+06	1.0726e+07	2.66522e+07	2.67235e+08	3.14321e+07	4.03054e+07	3.40285e+07	2.95511e+07
748a	746426	2.14821e+06	2.43531e+07	4.41998e+07	788925	4.72077e+06	1.5722e+06	748101	272031	840734	432464	3.43576e+06	396183	3.63821e+07	9.21004e+06	570005	1.04177e+07	3.53417e+06	5.24326e+06	1.37069e+06	5.15362e+06	414493	1.12479e+06	962981	752017	9.66427e+06	4.95823e+06	2.19733e+06	9.2569e+06	240904	35516.2	270681	550048	135050	812743	777954	955233	1.87704e+06	1.4831e+06	7.51889e+06	651146	1.04266e+07	1.72896e+07	2.62322e+07	2.31445e+08	4.51043e+07	2.83596e+07	5.47114e+07	1.02299e+07
738	1.14032e+06	748480	1.44315e+07	4.08037e+07	709894	5.17852e+06	653868	351297	254231	628238	651406	2.85638e+06	310004	3.26586e+07	8.70729e+06	469763	9.93567e+06	3.26457e+06	4.675e+06	1.27476e+06	6.83413e+06	333212	1.39813e+06	1.5083e+06	598332	1.02627e+07	4.64872e+06	3.46967e+06	1.06965e+07	313198	50627	247188	704603	250776	1.57047e+06	777797	2.07155e+06	2.48999e+06	1.92765e+06	5.62775e+06	1.06677e+06	6.28926e+06	1.26951e+07	2.64422e+07	2.5569e+08	3.40459e+07	4.54992e+07	8.42927e+07	1.60139e+07
816	1.31004e+06	659397	1.1951e+07	3.98333e+07	649044	2.82754e+06	372272	406606	527373	838277	1.19326e+06	3.06707e+06	230390	2.54776e+07	5.88296e+06	311766	6.24543e+06	1.46639e+06	2.4099e+06	713434	6.6479e+06	309315	1.02838e+06	1.46802e+06	636001	1.24169e+07	5.15436e+06	3.33987e+06	1.08918e+07	245078	26049	131028	752926	208383	466033	990617	2.60723e+06	1.54537e+06	958713	5.30343e+06	969412	4.81691e+06	1.182e+07	2.68622e+07	2.63772e+08	2.4596e+07	3.56309e+07	6.57743e+07	3.26277e+07
685	1.01299e+06	1.46689e+06	1.59197e+07	4.56552e+07	524965	5.48563e+06	1.07973e+06	288473	260688	635928	641404	3.30891e+06	423151	9.78573e+06	3.88929e+06	218145	5.06649e+06	1.73978e+06	2.35848e+06	715071	3.46156e+06	253039	641558	714110	390627	1.06217e+07	6.27979e+06	3.17207e+06	1.05988e+07	161907	38924.1	156529	733170	196320	1.04461e+06	782159	2.22504e+06	1.57102e+06	1.67322e+06	6.95548e+06	1.04301e+06	7.353e+06	1.31327e+07	2.49722e+07	2.46454e+08	3.77656e+07	2.39448e+07	6.98628e+07	1.2445e+07
803	775293	1.21068e+06	1.84001e+07	3.95908e+07	1.20604e+06	8.28738e+06	1.40375e+06	252464	88402	285522	87072.4	2.94497e+06	143849	2.44137e+07	6.1427e+06	526687	5.95371e+06	2.13275e+06	3.696e+06	972994	4.43012e+06	453026	1.10009e+06	833125	684709	9.78395e+06	7.00744e+06	3.09528e+06	1.03059e+07	263520	29916	155840	523288	102996	1.33326e+06	760128	1.75101e+06	4.05548e+06	1.68269e+06	1.04318e+07	1.38561e+06	1.24025e+07	1.71802e+07	2.37123e+07	2.22209e+08	4.27921e+07	5.77047e+07	9.55961e+07	2.62283e+07
687	1.04826e+06	1.52707e+06	1.51756e+07	4.44423e+07	685463	4.38697e+06	731443	398826	331863	766447	716169	3.49105e+06	296214	2.33499e+07	6.42062e+06	275603	1.0257e+07	3.6007e+06	3.73508e+06	996186	3.66166e+06	276403	1.12633e+06	719963	484961	1.15791e+07	4.93198e+06	3.82815e+06	1.04035e+07	255610	106479	150444	942128	229458	855954	629661	2.5794e+06	963963	566156	5.42709e+06	844244	5.94394e+06	1.19294e+07	2.32923e+07	2.46454e+08	3.40459e+07	4.10844e+07	7.15463e+07	2.9305e+07
688	1.16367e+06	1.4994e+06	1.29432e+07	3.40114e+07	674807	2.77302e+06	519544	585421	424404	956608	880166	3.01992e+06	222930	2.44137e+07	5.67876e+06	340866	7.66952e+06	2.43625e+06	3.37162e+06	875533	1.76394e+06	337275	1.02677e+06	418548	483794	1.13398e+07	5.15379e+06	4.04844e+06	9.91521e+06	271282	99525.1	257337	879401	218336	840532	571757	2.44815e+06	1.31582e+06	812873	4.72858e+06	672049	5.70248e+06	1.21482e+07	2.11924e+07	2.25673e+08	2.89188e+07	5.32899e+07	7.17868e+07	2.85666e+07
823	2.78427e+06	2.66423e+06	4.75786e+06	1000	2.39863e+06	1.04776e+07	1.91401e+06	1000	1000	1000	1000	4.59409e+06	12832.4	9.78573e+06	3.5346e+06	1.29719e+06	1.45541e+06	496816	4.71896e+06	1.93751e+06	4.94731e+06	1.52261e+06	5.00685e+06	1.25046e+06	1.31656e+06	2.23321e+06	4.67779e+06	6.18201e+06	3.68571e+06	1.22219e+06	224552	1000	571975	186654	3.09914e+06	1000	4.35325e+06	229895	572953	4.17692e+06	752387	4.74482e+06	7.74835e+06	1000	1.97076e+07	1.48444e+07	4.05651e+07	6.91413e+07	6.08132e+06
610	1.27291e+06	1.77141e+06	1.48121e+07	5.19052e+07	553181	2.82899e+06	399515	625520	638292	1.17076e+06	1.69257e+06	3.95027e+06	348045	7.73108e+06	3.5735e+06	222325	2.45026e+06	309811	1.7173e+06	833418	2.13721e+06	138424	565652	397667	279917	1.1683e+07	3.43553e+06	3.95046e+06	1.01659e+07	150636	206936	265767	717318	191953	1.94177e+06	947351	3.05007e+06	1.12514e+06	1.18874e+06	7.69619e+06	1.10957e+06	6.36696e+06	1.17049e+07	3.39407e+07	3.00125e+08	3.31651e+07	4.13811e+07	8.34655e+07	1.94579e+07
542	1.54012e+06	618796	8.00658e+06	7.07643e+06	28960.2	988332	224913	769065	638249	1.26888e+06	1.11065e+06	2.04752e+06	171694	5.02669e+06	2.95452e+06	312886	560056	1000	1.66366e+06	507680	2.97885e+06	146138	441760	592827	311738	1.27225e+07	4.99105e+06	2.84093e+06	8.94464e+06	112621	46852.4	331699	688967	141723	523260	744894	1.37836e+06	922976	1.33146e+06	4.78122e+06	852817	9.70723e+06	1.52471e+07	2.79731e+07	269504002	3.25191e+07	2.15375e+07	4.94544e+07	2.9816e+07
599	935774	1.22383e+06	1.16711e+07	1.1583e+07	223422	1.40404e+06	82293.5	973134	649343	1.71335e+06	1.61893e+06	2.17777e+06	313087	1.41981e+07	5.02671e+06	131323	4.17224e+06	478128	2.19974e+06	650134	2.17416e+06	206112	799552	367846	293605	1.27225e+07	2.70841e+06	3.4934e+06	9.31082e+06	190503	152026	136093	729077	207627	782200	825963	2.22622e+06	714048	989529	6.24064e+06	877684	3.84999e+06	1.4603e+07	3.33724e+07	295949332	3.26483e+07	3.56057e+07	7.38206e+07	2.83873e+07
613	630801	1.43935e+06	1.87384e+07	3.48276e+07	1.45832e+06	5.45272e+06	734629	675086	522956	770447	628928	4.19181e+06	241162	2.31343e+07	6.53791e+06	367011	7.84542e+06	2.98825e+06	3.12808e+06	840543	3.26029e+06	590417	1.57e+06	568515	644540	8.26743e+06	5.13356e+06	4.1986e+06	8.03847e+06	373947	83705.8	312534	593731	125588	553873	628013	2.88919e+06	3.85023e+06	1.5515e+06	6.38856e+06	912997	1.30069e+07	1.59984e+07	1.9448e+07	1.83209e+08	2.90306e+07	5.67821e+07	9.13337e+07	9.72488e+06
570	1.0738e+06	1.44671e+06	1.71679e+07	5.42771e+07	1.22292e+06	9.31405e+06	1.58255e+06	82097.1	60379.3	199415	129003	3.23124e+06	221988	1.27871e+07	4.2353e+06	332028	6.66901e+06	1.30094e+06	3.33472e+06	867399	5.08072e+06	520899	1.25908e+06	1.06215e+06	629884	9.60396e+06	3.13312e+06	4.21268e+06	9.43123e+06	287754	143638	124986	877804	219805	669334	701008	2.82105e+06	2.36998e+06	1.14178e+06	5.48391e+06	1.03031e+06	7.90945e+06	1.3315e+07	2.28581e+07	2.1383e+08	5.7068e+07	4.96739e+07	8.67651e+07	2.39226e+07
629	1.10747e+06	964731	1.16711e+07	4.4078e+07	497186	3.84258e+06	619258	456080	562985	541409	823406	4.19792e+06	403432	2.06651e+07	5.59532e+06	212900	1.1862e+07	2.21741e+06	3.42305e+06	833582	5.84674e+06	408802	1.18384e+06	1.21231e+06	749280	1.0792e+07	3.39661e+06	3.43927e+06	1.18363e+07	277577	80773.1	128198	649786	184801	787725	968243	2.44119e+06	3.23624e+06	3.07344e+06	6.29698e+06	704806	8.48491e+06	1.18123e+07	3.33724e+07	2.61153e+08	2.74801e+07	3.54576e+07	7.25515e+07	1.59754e+07
671	1.25256e+06	1.2643e+06	1.55974e+07	3.43532e+07	749045	2.50318e+06	106764	861417	632890	1.61757e+06	1.60891e+06	2.87755e+06	339457	1.70201e+07	5.1196e+06	414476	5.16425e+06	805184	2.52851e+06	664917	3.41538e+06	313172	806170	663263	353885	1.12375e+07	5.67849e+06	3.41405e+06	1.12795e+07	194602	52800.4	249995	532461	139868	588252	1.02386e+06	2.11567e+06	1.81561e+06	1.44555e+06	8.19975e+06	1.06473e+06	8.10446e+06	1.43884e+07	3.47932e+07	2.82031e+08	2.96766e+07	4.96739e+07	7.34398e+07	2.59763e+07
673	3.35726e+06	2.45444e+06	1000	1000	2.53449e+06	1.66621e+07	3.03087e+06	1000	1000	1000	1000	5.02116e+06	81795.4	1.3375e+07	4.65312e+06	1.5359e+06	4.06292e+06	1.3204e+06	5.43763e+06	1.59124e+06	7.40561e+06	1.95338e+06	7.43693e+06	1.52643e+06	1.99711e+06	1000	3.63549e+06	5.46802e+06	1.1976e+06	1.73064e+06	280640	1000	333601	123088	1.21044e+06	1000	4.77275e+06	172341	627259	6.99466e+06	1.0828e+06	5.62034e+06	5.26717e+06	1000	1000	7.45336e+06	2.0649e+07	8.05466e+07	8.01513e+06
708	1.5635e+06	1.10074e+06	8.53008e+06	4.09945e+07	456064	4.1303e+06	867154	286348	305081	521948	715310	2.16626e+06	182380	2.79263e+06	2.15662e+06	180473	1.39655e+06	332155	1.28693e+06	612709	2.33593e+06	122419	506593	416025	288509	1.06435e+07	3.20457e+06	3.53357e+06	8.86377e+06	119968	1000	205776	810552	206108	911298	715064	2.01983e+06	1.7043e+06	1.24268e+06	7.51791e+06	1.08599e+06	4.40216e+06	1.10609e+07	2.42789e+07	2.37491e+08	3.23899e+07	2.96823e+07	6.73483e+07	2.59763e+07
652	1.43841e+06	799276	1.24563e+07	3.34044e+07	1.12904e+06	4.5193e+06	1.20016e+06	216916	218340	333015	405312	3.14182e+06	215795	6.67284e+06	3.14991e+06	309932	2.20459e+06	308323	2.09832e+06	986739	3.8056e+06	358554	756749	794958	615786	9.90097e+06	4.25321e+06	3.31665e+06	7.92178e+06	182493	11874.9	120431	924725	209362	566589	504796	1.86205e+06	1.93461e+06	1.27968e+06	6.15353e+06	1.03062e+06	8.39203e+06	1.2671e+07	1.71747e+07	1.95735e+08	3.52324e+07	4.71564e+07	6.65869e+07	2.54406e+07
709	678826	1.50531e+06	1.66444e+07	4.26548e+07	266240	5.03868e+06	1.16103e+06	251721	202802	621366	517968	3.67962e+06	566416	6.08493e+06	2.85668e+06	261894	3.41254e+06	860081	2.22236e+06	692012	3.47114e+06	147744	573301	718734	420646	1.00495e+07	4.28287e+06	2.94275e+06	1.02773e+07	138393	8545.3	165839	704334	196339	1.22482e+06	684213	2.14855e+06	1.86763e+06	1.21279e+06	6.02793e+06	1.16254e+06	7.85177e+06	1.3315e+07	2.65523e+07	2.36099e+08	3.41988e+07	2.10933e+07	5.93532e+07	2.77622e+07
677	1.28349e+06	1.37415e+06	9.83884e+06	4.73986e+07	243072	3.90251e+06	334195	442880	688917	666288	1.23926e+06	3.16715e+06	339043	1.67849e+07	5.08248e+06	180828	1.02554e+07	4.06301e+06	3.03655e+06	902335	5.77842e+06	306032	982617	1.20295e+06	484596	1.2871e+07	2.20656e+06	3.06868e+06	1.3618e+07	240599	41461.4	73318.1	830538	231277	861784	979306	2.77683e+06	1.05975e+06	1.03167e+06	3.84403e+06	506925	5.51809e+06	7.10246e+06	3.50774e+07	3.07084e+08	4.01422e+07	2.43512e+07	6.78559e+07	2.91909e+07
683	832783	1.34334e+06	1.97854e+07	2.62888e+07	626175	1.95744e+06	104528	1.35096e+06	1.00956e+06	1.55288e+06	1.39035e+06	4.04302e+06	224597	3.81848e+07	9.4627e+06	392845	1.80591e+07	4.12974e+06	6.21395e+06	1.52539e+06	3.39725e+06	623758	1.79225e+06	615961	905957	1.0792e+07	6.86266e+06	3.27568e+06	1.02773e+07	455763	62818.2	203403	584837	154648	949390	804407	1.93721e+06	2.11532e+06	1.67509e+06	4.17828e+06	638605	6.97779e+06	1.76085e+07	3.08149e+07	2.59761e+08	4.72485e+07	5.21914e+07	6.79828e+07	2.59763e+07
687a	634001	1.07696e+06	2.03089e+07	1.41921e+07	927692	2.0402e+06	509114	1.12191e+06	382346	1.67587e+06	615390	3.87407e+06	334166	3.26585e+07	8.37767e+06	440278	1.03701e+07	2.34561e+06	4.03633e+06	1.09669e+06	3.30402e+06	563516	991252	612248	797854	9.00994e+06	2.78931e+06	2.94636e+06	9.34755e+06	256533	92154.5	475652	538298	131452	1.81626e+06	706296	1.63902e+06	1.94561e+06	1.23369e+06	6.82428e+06	1.19979e+06	1.02706e+07	1.91112e+07	2.9394e+07	2.26356e+08	5.71972e+07	5.61897e+07	6.73483e+07	1.74041e+07
689	2.63722e+06	1.18042e+06	1.29798e+07	5.75978e+07	1.23311e+06	1.15185e+07	1.78811e+06	128322	88554.6	261002	191987	4.42928e+06	291938	3.54804e+07	9.15705e+06	726893	1.27801e+07	1.37973e+06	4.51044e+06	1.23046e+06	5.51048e+06	630895	2.27228e+06	1.1221e+06	1.01377e+06	8.41593e+06	4.56503e+06	4.00819e+06	1.01659e+07	535714	56035.6	124213	709415	207221	2.57614e+06	783837	3.06377e+06	4.80455e+06	1.5111e+06	7.8619e+06	1.05612e+06	8.51573e+06	1.34223e+07	2.59839e+07	2.26356e+08	3.57492e+07	4.61198e+07	9.20951e+07	1.95472e+07
711	922737	429666	1.08858e+07	9.21114e+06	397075	728151	23861.2	1.04136e+06	777413	1.72246e+06	1.84932e+06	2.06155e+06	170940	2.23112e+07	6.28334e+06	258171	4.91989e+06	1.05576e+06	3.55436e+06	1.56345e+06	3.92527e+06	356830	1.22498e+06	801851	493167	1.0792e+07	5.85055e+06	3.48252e+06	8.44039e+06	279063	88686.2	164364	716030	153779	305115	650541	1.56637e+06	1.05907e+06	640448	5.26029e+06	830522	4.76401e+06	1.48177e+07	2.17214e+07	2.33316e+08	2.59297e+07	3.69385e+07	6.45564e+07	2.57085e+07
710	989912	1.43939e+06	1.55974e+07	5.23796e+07	748218	3.89847e+06	673045	378580	349105	722271	847218	2.52681e+06	247422	3.67738e+07	9.15705e+06	641507	9.45206e+06	3.61255e+06	3.82393e+06	991467	4.20131e+06	327276	1.44243e+06	813287	675309	1.1683e+07	3.10666e+06	3.70774e+06	8.7946e+06	327451	115782	306745	879243	189750	1.14375e+06	863004	2.39098e+06	1.17143e+06	926522	7.26747e+06	1.07888e+06	4.06493e+06	1.2993e+07	3.08149e+07	2.55585e+08	3.14855e+07	3.93079e+07	6.88712e+07	1.57969e+07
692	1.20708e+06	1.89827e+06	1.55974e+07	3.29301e+07	1.02721e+06	5.02143e+06	807875	462525	281333	901174	678493	3.99714e+06	194628	2.18409e+07	5.99403e+06	535485	7.38638e+06	953960	3.04906e+06	1.3786e+06	2.75568e+06	399635	1.27533e+06	508133	710790	7.82191e+06	3.85192e+06	4.3463e+06	8.37571e+06	303552	63451.6	125894	714675	181164	1.86831e+06	563158	3.51253e+06	1.33821e+06	1.13336e+06	6.6405e+06	800929	7.78737e+06	1.4281e+07	2.00164e+07	1.9156e+08	2.94182e+07	4.28619e+07	9.65369e+07	1.6154e+07
695	1.26293e+06	439526	1.55974e+07	3.55392e+07	451677	2.0195e+06	505656	582296	562187	739622	953787	2.60921e+06	236315	3.38343e+07	8.54575e+06	280778	1.35834e+07	2.55238e+06	4.69083e+06	1.20197e+06	3.53006e+06	298276	940327	662591	628991	1.15345e+07	5.29233e+06	2.32571e+06	1.03887e+07	215710	35199.3	112970	736829	193183	982958	672258	1.27931e+06	1.18831e+06	1.14593e+06	5.99635e+06	899477	7.68426e+06	1.3315e+07	2.42789e+07	2.43059e+08	4.07882e+07	3.51615e+07	3.84136e+07	2.77622e+07
614	1.32388e+06	404056	9.83884e+06	2.74747e+07	236048	1.77794e+06	291479	570482	603774	730300	1.01012e+06	1.88389e+06	253458	3.11299e+07	7.97144e+06	445314	6.00963e+06	1.68376e+06	2.72467e+06	752183	3.95293e+06	266776	1.03738e+06	804268	448877	1.37621e+07	4.55789e+06	3.20044e+06	9.72052e+06	240431	99753.8	325278	767518	166670	743761	837794	1.49236e+06	967494	1.19001e+06	5.37284e+06	1.02902e+06	4.45449e+06	1.2671e+07	2.88257e+07	2.82031e+08	2.50252e+07	2.71648e+07	57957204	3.07982e+07
713	1.04286e+06	2.01678e+06	1.90001e+07	4.31292e+07	1.12951e+06	4.43937e+06	483992	495550	311748	892427	757787	3.16917e+06	265522	3.06596e+07	7.69082e+06	561826	1.05997e+07	2.37208e+06	3.61988e+06	1.00353e+06	4.43537e+06	644349	1.68961e+06	883233	620853	8.86144e+06	3.2437e+06	3.52205e+06	9.10523e+06	400947	106593	282043	745649	180202	1.21552e+06	767709	2.58384e+06	2.1719e+06	1.22051e+06	4.92995e+06	606978	8.25621e+06	1.50324e+07	2.59839e+07	2.37491e+08	2.64465e+07	5.6634e+07	84480733	2.32082e+07
732a	1.18481e+06	761541	1.53356e+07	5.54631e+07	118186	3.73351e+06	989720	62155.4	96313.7	181328	262161	1.76988e+06	241784	2.1253e+07	5.94688e+06	351035	9.3373e+06	3.24168e+06	3.93266e+06	1.51177e+06	6.19507e+06	251634	777115	1.37828e+06	483377	1.27225e+07	5.09608e+06	2.69839e+06	1.30612e+07	158629	32988.7	111542	1.01453e+06	249602	479117	875630	1.12795e+06	1.13264e+06	1.21906e+06	3.45508e+06	494155	3.37465e+06	1.05242e+07	3.08149e+07	2.97341e+08	3.30359e+07	2.00567e+07	3.32104e+07	2.88337e+07
728	1.04055e+06	1.09537e+06	1.37651e+07	2.29681e+07	919718	1.49149e+06	230436	743969	526319	1.08103e+06	878065	3.29566e+06	178875	2.92486e+07	7.60567e+06	676268	5.57949e+06	1.92593e+06	3.24984e+06	884083	3.47339e+06	452826	1.09283e+06	695904	618870	1.0495e+07	7.32057e+06	3.42732e+06	9.72052e+06	261615	44233.3	379013	623049	134433	431015	722052	1.76436e+06	2.2929e+06	1.63605e+06	6.13583e+06	1.14984e+06	9.60037e+06	1.68571e+07	2.56998e+07	2.36099e+08	3.41988e+07	6.38902e+07	6.62061e+07	2.60656e+07
712	1.24446e+06	670407	1.32416e+07	2.58144e+07	774216	2.23171e+06	52998.1	360173	252703	614983	557100	2.37412e+06	247485	4.79152e+06	2.69406e+06	46247	2.87849e+06	716023	2.06875e+06	622733	2.29606e+06	245230	435412	429114	151411	1.0198e+07	6.03743e+06	95388.3	1.03887e+07	104736	152710	384880	950658	242544	80914.9	505766	1.4368e+06	577613	863701	5.57775e+06	880345	4.52008e+06	1.17049e+07	1.6038e+07	201302888	3.92378e+07	4.78969e+07	5.37693e+07	2.29404e+07
737	774967	1.89793e+06	2.37116e+07	2.62888e+07	1.79244e+06	4.02805e+06	373465	764903	370572	1.39342e+06	879635	4.39214e+06	277943	3.26585e+07	8.31251e+06	140573	1.55343e+07	3.2347e+06	4.60176e+06	1.20885e+06	2.53253e+06	685123	1.90031e+06	441334	667252	7.4939e+06	1.0065e+07	3.7272e+06	1.02773e+07	445990	70014.1	137117	694672	177742	566120	583517	2.57618e+06	2.08204e+06	1.04495e+06	4.23537e+06	943911	8.56101e+06	1.54617e+07	1.88797e+07	1.81817e+08	4.04006e+07	7.33677e+07	8.1435e+07	2.17795e+07
735	1.54584e+06	510977	1.16711e+07	4.00457e+07	1.1934e+06	3.67155e+06	362717	111659	155107	187762	257811	4.41341e+06	159394	2.18409e+07	6.02733e+06	588514	7.84542e+06	2.63317e+06	5.35163e+06	1.45976e+06	9.15047e+06	1.01816e+06	1.37453e+06	2.08491e+06	631031	1.0198e+07	6.30331e+06	3.1403e+06	1.17249e+07	286189	37799	85388.7	847264	249508	903807	661794	2.12738e+06	2.38224e+06	1.69513e+06	6.30554e+06	1.04125e+06	8.19624e+06	1.44957e+07	2.34264e+07	2.36099e+08	5.43547e+07	6.41864e+07	7.24246e+07	8.52314e+06
719	1.03696e+06	1.76004e+06	1.90001e+07	5.42771e+07	482295	4.66184e+06	704671	474706	529964	945602	1.22903e+06	4.33072e+06	282057	1.54915e+07	5.32056e+06	374132	6.3935e+06	1.86776e+06	2.77417e+06	828899	4.91786e+06	328540	1.20307e+06	1.10076e+06	755186	1.15345e+07	3.31907e+06	3.23169e+06	9.60917e+06	279350	94836.4	296670	632368	214582	2.7955e+06	940918	2.51927e+06	1.55374e+06	1.31194e+06	6.8301e+06	979193	9.60428e+06	1.48177e+07	3.33724e+07	2.91774e+08	3.54908e+07	2.56839e+07	7.29322e+07	1.49932e+07
736	1.43449e+06	586474	1.01006e+07	3.38788e+07	695582	3.46752e+06	635156	349578	363370	625641	827165	2.63865e+06	154076	1.81959e+07	5.18051e+06	320085	9.45206e+06	2.27193e+06	3.5733e+06	1.01502e+06	5.09158e+06	408049	1.06905e+06	1.09243e+06	692456	1.1089e+07	5.94441e+06	3.07314e+06	1.16136e+07	241187	43320.8	100707	808456	208177	1.24496e+06	642753	2.02536e+06	1.53626e+06	1.16959e+06	4.87243e+06	641686	4.33428e+06	1.06315e+07	2.34264e+07	2.45842e+08	2.30872e+07	3.32363e+07	6.30335e+07	2.99946e+07
720	1.00153e+06	1.83194e+06	1.29798e+07	1.60896e+07	892463	3.25567e+06	353604	690184	433239	1.27762e+06	952848	3.82683e+06	218615	8.78931e+06	3.6709e+06	302804	3.93868e+06	1.41028e+06	1.95706e+06	597780	1.96766e+06	312182	859265	329371	492101	7.82191e+06	3.41078e+06	4.08058e+06	9.01295e+06	212047	67030.8	346656	528665	160115	2.29979e+06	562391	3.18853e+06	2.72432e+06	1.40232e+06	8.92127e+06	1.14684e+06	8.37337e+06	1.50324e+07	2.08689e+07	1.94344e+08	4.84113e+07	5.41165e+07	9.29835e+07	1.63326e+07
756a	1.56005e+06	656133	9.05358e+06	3.57763e+07	972097	4.08265e+06	682270	222298	224850	286152	435217	3.17291e+06	166602	1.09058e+07	3.9196e+06	125970	5.64632e+06	1.46887e+06	1.97096e+06	596532	2.40648e+06	293571	669285	447071	418581	1.06435e+07	6.0854e+06	1000	1.05e+07	151463	21185.8	127043	994820	210495	777935	589542	2.24063e+06	1.00251e+06	1.00636e+06	4.26394e+06	855083	4.432e+06	1.02022e+07	1.88797e+07	2.19397e+08	3.12271e+07	4.55275e+07	6.62061e+07	2.73158e+07
757a	1.37719e+06	510413	1.19328e+07	2.43913e+07	478589	531807	236486	511056	376424	841281	620804	2.41582e+06	196570	1.26695e+07	4.27396e+06	276712	3.45754e+06	1.02584e+06	2.8676e+06	864904	2.88858e+06	234429	343832	566061	298281	1.1683e+07	4.76895e+06	1000	9.16396e+06	76563.3	35851.7	187911	680924	181860	320971	604617	708990	828065	769894	6.35802e+06	1.10982e+06	9.30885e+06	1.59984e+07	2.1153e+07	2.43059e+08	3.48448e+07	3.96041e+07	2.99108e+07	2.72265e+07
758a	1.56935e+06	1.8112e+06	1.27181e+07	6.0444e+07	981453	9.957e+06	2.2425e+06	1000	77278.2	40542.6	153230	2.64282e+06	175152	13727760	4.59322e+06	188565	5.62071e+06	1.61218e+06	2.93018e+06	801521	4.16793e+06	328823	1.03484e+06	883311	749673	1.0198e+07	3.61733e+06	3.89043e+06	9.2419e+06	240422	30838.3	47685.8	858591	280372	1.60503e+06	562705	2.27967e+06	2.47998e+06	2.88139e+06	5.5333e+06	932407	4.35128e+06	8.59212e+06	1.85955e+07	2.18005e+08	3.31651e+07	3.66423e+07	6.04953e+07	1.72256e+07
721	2.06117e+06	1.91481e+06	2.26646e+07	4.52639e+07	1.24305e+06	6.23591e+06	1.82623e+06	344588	212813	793505	546527	4.6466e+06	589611	1.18464e+07	4.19655e+06	249025	4.85892e+06	942854	2.30062e+06	710530	3.22118e+06	344245	842972	710665	904018	9.60396e+06	5.92426e+06	3.33933e+06	9.10722e+06	206115	95988.4	229715	700372	176484	2.44134e+06	672195	2.43126e+06	1.90998e+06	2.84034e+06	7.23035e+06	1.0069e+06	9.00156e+06	1.64278e+07	2.28581e+07	2.08262e+08	3.31651e+07	3.59019e+07	6.62061e+07	4.02633e+07
761a	1.69987e+06	983937	7.48308e+06	3.22185e+07	257408	2.71166e+06	402807	549666	519068	606102	920679	2.53294e+06	489584	5.22947e+07	1.19079e+07	489224	1.97805e+07	4.03969e+06	5.64258e+06	1.50707e+06	6.19172e+06	473236	1.98699e+06	1.26702e+06	1.00304e+06	1.27225e+07	7.49073e+06	3.21308e+06	1.26158e+07	494664	115326	157456	807050	218413	1.57916e+06	766469	2.40904e+06	1.08456e+06	1.85638e+06	5.44758e+06	994049	2.94539e+06	7.64649e+06	2.56998e+07	2.62545e+08	2.89014e+07	3.13112e+07	6.30335e+07	3.70488e+07
760a	1.59222e+06	1.05574e+06	1.79531e+07	3.95714e+07	1.27343e+06	4.75352e+06	741444	719202	453302	849189	640840	2.46384e+06	170397	5.67628e+07	1.2723e+07	442327	1.35834e+07	3.20323e+06	5.48891e+06	1.55658e+06	4.41286e+06	813421	2.41515e+06	882917	1.1732e+06	1.15345e+07	6.42858e+06	4.29102e+06	8.60673e+06	596366	104472	246147	727962	151500	1.1623e+06	759036	1.95929e+06	2.13969e+06	2.31937e+06	9.24179e+06	1.26634e+06	8.84208e+06	1.58911e+07	2.39948e+07	2.36099e+08	1.58517e+07	5.81148e+07	8.2704e+07	1.19572e+07
762a	1.41499e+06	567811	1.32416e+07	4.88218e+07	740758	3.67807e+06	777739	355058	287958	473989	487320	2.96015e+06	232081	2.81904e+07	6.9727e+06	415761	1.01406e+07	2.24414e+06	3.87192e+06	1.00625e+06	4.92313e+06	437363	1.09614e+06	1.03376e+06	681678	1.0792e+07	6.76079e+06	2.81301e+06	1.2059e+07	259158	39822.5	303286	774565	175956	1.16217e+06	710578	1.69446e+06	1.7931e+06	1.24031e+06	6.4309e+06	985331	5.50848e+06	1.27783e+07	2.56998e+07	2.47234e+08	4.33723e+07	4.62679e+07	5.94801e+07	2.90123e+07
764a	1.18879e+06	1.08774e+06	1.42886e+07	4.66871e+07	830373	7.02754e+06	956568	162812	177949	247364	292407	2.74638e+06	139970	2.33695e+07	6.23667e+06	389367	6.41967e+06	1.66015e+06	3.56217e+06	976120	4.7147e+06	369604	1.17185e+06	1.00322e+06	477555	1.06435e+07	5.72812e+06	3.59838e+06	1.07227e+07	260051	47413.2	178528	865191	253145	1.43696e+06	643250	2.28484e+06	2.33782e+06	1.22083e+06	5.20305e+06	883784	7.77514e+06	1.21343e+07	1.97322e+07	2.16613e+08	3.74289e+07	4.44909e+07	8.01659e+07	2.76729e+07
730	1.30081e+06	2.48837e+06	1.87384e+07	4.76358e+07	718160	6.01068e+06	422850	214030	149463	780092	578154	2.87821e+06	265607	1.50212e+07	4.52508e+06	355024	5.93659e+06	1.60739e+06	2.90804e+06	848696	3.08985e+06	261949	1.12289e+06	583182	362344	9.45546e+06	8.24271e+06	4.43156e+06	1.21703e+07	285607	129855	143562	816254	224192	904578	667138	3.82305e+06	2.07571e+06	1.07513e+06	4.10777e+06	718780	3.7855e+06	1.23489e+07	2.42789e+07	2.26356e+08	3.51032e+07	3.87155e+07	9.86943e+07	1.42789e+07
731	1.0834e+06	1.85408e+06	1.74296e+07	3.93342e+07	1.50376e+06	6.23536e+06	1.43204e+06	236637	175347	557613	416503	4.86454e+06	160543	1.6197e+07	4.72219e+06	434396	5.88939e+06	1.84372e+06	2.40054e+06	685758	1.53504e+06	332283	980549	365736	694944	7.97042e+06	5.14649e+06	3.78256e+06	7.74888e+06	234444	90793	102577	700170	174195	2.11668e+06	399723	2.87116e+06	2.37574e+06	1.45621e+06	7.91162e+06	1.18476e+06	5.72882e+06	1.2671e+07	1.20596e+07	1.49804e+08	3.51032e+07	5.35242e+07	7.33129e+07	4.24957e+07
766a	1.45248e+06	314022	1.29798e+07	3.67251e+07	606349	3.41044e+06	811663	242507	131693	667257	389669	2.22259e+06	191711	3.43046e+07	8.42264e+06	886111	9.10778e+06	2.83179e+06	7.37384e+06	2.13931e+06	7.6142e+06	540595	1.62798e+06	1.7449e+06	810649	1.00495e+07	6.2031e+06	42861.6	1.06114e+07	370853	63081.3	155389	857851	305825	168894	443407	1.67649e+06	1.55279e+06	1.23033e+06	4.24423e+06	894608	6.76049e+06	1.15976e+07	1.23438e+07	180424996	3.47156e+07	4.31581e+07	5.87186e+07	2.55299e+07
770	1.0537e+06	1.4106e+06	1.69782e+07	2.29979e+07	692905	3.71283e+06	752384	539684	308978	710066	346535	3.89835e+06	360829	3.36721e+07	8.97192e+06	495875	1.04439e+07	2.96744e+06	4.0133e+06	1.00959e+06	3.76819e+06	481328	1.46641e+06	707483	880183	1.0307e+07	8.55484e+06	3.96833e+06	1.00899e+07	333009	72226	193511	790082	117034	1.42272e+06	816761	2.25577e+06	2.97078e+06	1.45947e+06	8.20651e+06	1.12797e+06	1.15872e+07	1.99129e+07	2.59718e+07	2.43301e+08	5.06418e+07	4.65089e+07	8.76597e+07	3.35362e+07
732	819521	1.38055e+06	1.78725e+07	4.46561e+07	667043	5.75172e+06	1.52656e+06	160321	129803	356730	311297	3.64124e+06	304119	1.06262e+07	4.27729e+06	244640	5.04081e+06	1.46114e+06	2.82192e+06	905350	3.99667e+06	346613	897413	833968	584374	1.10275e+07	5.71535e+06	3.04987e+06	1.11197e+07	220987	55536.4	141507	1.01539e+06	145050	942760	892187	2.38583e+06	1.47443e+06	1.07469e+06	6.49683e+06	1.0901e+06	7.76313e+06	1.44043e+07	2.93006e+07	2.60578e+08	3.24573e+07	3.58893e+07	6.69964e+07	1.93602e+07
768	622469	1.94771e+06	1.84686e+07	3.09484e+07	310132	2.50116e+06	605976	756938	527005	1.21317e+06	805162	3.87467e+06	569260	4.84516e+07	1.24711e+07	479075	2.30912e+07	5.71388e+06	5.87629e+06	1.94565e+06	5.47356e+06	498573	1.67669e+06	1.08542e+06	1.11196e+06	9.70669e+06	6.71212e+06	2.42011e+06	1.28708e+07	375208	84403.4	229593	722678	121346	2.04388e+06	882584	2.60389e+06	1.01428e+06	848436	6.99509e+06	908295	7.34673e+06	1.35981e+07	3.1093e+07	2.54408e+08	5.01755e+07	2.85883e+07	6.02274e+07	2.48923e+07
772	963136	999026	1.6084e+07	4.10921e+07	600827	3.98266e+06	1.25506e+06	344957	307279	540020	510507	3.8144e+06	334250	2.92884e+07	7.83953e+06	458562	9.471e+06	2.13515e+06	5.02425e+06	1.1454e+06	6.82817e+06	513956	1.25984e+06	1.40572e+06	835830	1.04271e+07	6.23972e+06	2.69522e+06	1.21203e+07	283572	42253.6	123812	805227	191815	1.76894e+06	823710	2.17637e+06	2.42837e+06	2.11784e+06	6.57338e+06	1.15527e+06	8.53472e+06	1.4673e+07	2.82764e+07	2.61812e+08	39917606	4.23606e+07	6.26025e+07	2.28178e+07
773	946167	1.1115e+06	1.6084e+07	2.51911e+07	1.15942e+06	6.20706e+06	342126	653365	387159	1.01378e+06	703882	4.80429e+06	195545	5.17081e+07	1.2871e+07	631164	1.95535e+07	4.91322e+06	6.04245e+06	2.21073e+06	5.71948e+06	751867	2.6967e+06	1.09293e+06	1.11253e+06	8.29859e+06	8.98967e+06	4.77498e+06	1.1495e+07	653306	85975.5	138863	860717	217315	872966	704166	3.73879e+06	2.7633e+06	1.16352e+06	5.22973e+06	627805	7.72733e+06	1.4673e+07	2.34113e+07	2.16152e+08	4.34146e+07	4.94957e+07	1.11648e+08	1.65077e+07
744	1.35869e+06	858079	9.22821e+06	2.46428e+07	177039	1.47173e+06	168895	556031	584408	874256	1.08935e+06	3.27259e+06	228892	1.23797e+07	4.3632e+06	365372	5.98904e+06	1.76038e+06	2.67278e+06	797395	3.65241e+06	327521	924554	727356	514445	1.10275e+07	6.16405e+06	3.41434e+06	1.19953e+07	221387	112665	228293	861463	209040	516901	778614	2.26459e+06	2.16917e+06	1.39354e+06	6.11754e+06	955167	7.05944e+06	1.33294e+07	2.80203e+07	2.53174e+08	4.18992e+07	4.23606e+07	70915272	1.56433e+07
777	2.5182e+06	1.62193e+06	1000	1000	1.21829e+06	9.2822e+06	672947	1000	1000	1000	1000	4.04312e+06	40961.2	6.74343e+06	3.69849e+06	944137	3.41281e+06	1.00232e+06	3.47694e+06	1.08488e+06	4.52769e+06	845714	3.31586e+06	947275	849361	1.7476e+06	5.06476e+06	4.94964e+06	3.37929e+06	808564	199047	42683.9	740662	180177	1.45187e+06	1000	3.76266e+06	1000	119450	5.31083e+06	779552	3.74713e+06	3.92365e+06	1000	1.79452e+06	1.1545e+07	2.89202e+07	7.1509e+07	4.88386e+06
746	813505	1.08505e+06	1.84686e+07	4.60269e+07	97696.5	1.37364e+06	203094	378946	445551	909600	1.30122e+06	1.37905e+06	170608	2.60319e+07	7.02019e+06	354258	9.29412e+06	2.58271e+06	4.60427e+06	1.22909e+06	5.0628e+06	327697	874430	1.07087e+06	393208	1.23483e+07	4.15238e+06	1.54429e+06	1.1495e+07	207859	92115	165971	802894	195762	439684	978883	1.33742e+06	876005	379027	4.18138e+06	697245	6.12396e+06	1.40012e+07	3.33975e+07	3.00068e+08	4.60957e+07	2.77587e+07	4.18204e+07	5.70052e+06
780	803974	1.28702e+06	1.31032e+07	2.29979e+07	653317	2.0291e+06	669002	404221	249277	474226	408698	2.32588e+06	214132	7.36968e+06	3.51152e+06	224133	4.3058e+06	1.22003e+06	2.04949e+06	867163	1.82076e+06	294767	713566	289083	430940	1.0187e+07	3.49996e+06	2.80567e+06	8.55944e+06	167525	114825	192631	815893	128866	1.18525e+06	577622	1.37385e+06	917952	839142	6.28365e+06	942117	7.32943e+06	1.19859e+07	2.18749e+07	2.16152e+08	2.83774e+07	4.99935e+07	5.48834e+07	1.72857e+07
776	1.1348e+06	961759	1.2209e+07	2.19013e+07	215725	2.5632e+06	440853	461186	314747	858572	681853	3.29175e+06	284059	1.71392e+07	5.49226e+06	319671	6.58528e+06	1.23268e+06	3.28528e+06	864226	2.8259e+06	304858	1.03263e+06	503750	545569	9.94683e+06	6.15687e+06	3.76749e+06	8.27744e+06	247036	129777	211454	741030	266934	1.69494e+06	538853	2.07419e+06	940599	796196	5.45591e+06	768394	6.66225e+06	1.42699e+07	2.00825e+07	214917737	2.7678e+07	3.00817e+07	7.26966e+07	15989093
781	1.33766e+06	735870	6.92181e+06	2.46428e+07	373907	2.78457e+06	146353	386184	420728	705367	877787	3.3513e+06	217817	1.96442e+07	5.95252e+06	238603	8.40969e+06	1.52568e+06	2.83429e+06	807684	3.64095e+06	375300	1.25638e+06	721835	527719	1.11475e+07	2.4798e+06	4.00031e+06	1.08696e+07	302401	38179	286705	840494	218089	629661	845099	2.74791e+06	1.63789e+06	914937	5.69082e+06	755302	5.05487e+06	8.35824e+06	2.69961e+07	2.40833e+08	2.10337e+07	3.83783e+07	8.3622e+07	2.70533e+07
747	875048	1.01219e+06	1.04205e+07	2.71102e+07	137359	2.31862e+06	385271	491644	395671	899271	950092	3.09489e+06	238506	7.99593e+06	3.44272e+06	269580	4.33944e+06	1.4438e+06	1.92872e+06	850340	2.58614e+06	248461	817334	484651	440861	1.09074e+07	3.41753e+06	3.01433e+06	9.35443e+06	198742	114717	277533	679814	171651	777132	780128	2.0718e+06	1.70473e+06	1.33777e+06	6.15305e+06	867757	6.76616e+06	1.34638e+07	2.54597e+07	2.32195e+08	3.05922e+07	2.60994e+07	6.18899e+07	1.95331e+07
783	1.20385e+06	549943	8.63205e+06	2.98518e+07	631257	4.41041e+06	1.01503e+06	323047	328817	406299	505611	3.18454e+06	346924	1.98947e+07	5.6351e+06	306567	7.01989e+06	1.59906e+06	2.92811e+06	889158	2.95961e+06	327018	1.1059e+06	548650	638871	9.70669e+06	3.91265e+06	3.16185e+06	8.20326e+06	274665	36243.9	225942	667727	191400	1.05361e+06	546017	1.94477e+06	1.61927e+06	1.96533e+06	6.08926e+06	886348	6.31075e+06	9.43309e+06	1.88022e+07	1.95173e+08	3.02425e+07	3.45619e+07	6.09399e+07	1.7545e+07
784	1.62253e+06	688101	6.43506e+06	2.38204e+07	256508	1.75699e+06	145484	400697	579242	838572	1.33103e+06	3.24716e+06	163048	1.56362e+07	4.91465e+06	390836	4.39883e+06	1.03982e+06	2.41151e+06	774665	2.8008e+06	288136	957820	527769	441362	1.10275e+07	6.71914e+06	4.10053e+06	8.98543e+06	236710	176614	321316	842767	117168	843568	773559	2.46181e+06	1.26451e+06	2.20258e+06	5.16312e+06	809807	6.14499e+06	1.29264e+07	2.46915e+07	2.34663e+08	2.59295e+07	3.45619e+07	8.05344e+07	2.73126e+07
748	841505	1.03767e+06	1.42955e+07	2.60136e+07	425546	1.24298e+06	794744	347910	352762	796919	922492	3.46328e+06	535553	1.02504e+07	4.08918e+06	316902	5.00897e+06	1.31021e+06	2.16345e+06	670783	3.25283e+06	288016	763403	682743	588783	1.10275e+07	4.78877e+06	2.30769e+06	8.73509e+06	170319	56804.8	100765	772488	139311	1.95529e+06	744314	1.52271e+06	1.35192e+06	1.80673e+06	5.58822e+06	985203	8.03153e+06	1.49417e+07	2.52037e+07	2.22322e+08	2.34816e+07	2.19511e+07	4.51455e+07	3.7426e+07
785	3.25622e+06	3.89092e+06	3599.12	1000	1.7779e+06	1.64797e+07	1.05092e+06	1000	1000	1000	1000	5.13591e+06	82288.2	1.87674e+07	5.79221e+06	2.04481e+06	5.03318e+06	1.37649e+06	8.01599e+06	2.07011e+06	9.50499e+06	2.36424e+06	8.12136e+06	2.07194e+06	2.24323e+06	2.20529e+06	6.66785e+06	7.22561e+06	4.06302e+06	1.88104e+06	241087	29633.4	392095	97164.4	1.13473e+06	26599.5	4.64614e+06	460620	113692	1.31866e+07	1.816e+06	1.24084e+07	9.7018e+06	1000	1.58629e+07	3.32733e+07	5.29803e+07	1.21148e+08	1.17289e+07
787	734072	1.31994e+06	1.75744e+07	4.10921e+07	882598	2.82522e+06	412641	891821	809083	1.63039e+06	1.64515e+06	4.22919e+06	206400	5.37121e+07	1.31709e+07	380327	1.99072e+07	5.0598e+06	6.31479e+06	2.23803e+06	5.50136e+06	674073	2.17168e+06	1.07894e+06	1.21918e+06	9.70669e+06	3.20481e+06	2.86971e+06	1.01067e+07	508529	226608	196383	534329	204663	993658	910119	2.57324e+06	1.88742e+06	1.4394e+06	5.85703e+06	874857	8.05027e+06	1.53448e+07	2.77642e+07	2.61812e+08	3.29236e+07	4.21947e+07	6.99652e+07	1.70264e+07
754	999602	1.01157e+06	1.25071e+07	35334858	589021	5.10597e+06	1.08043e+06	168535	183872	382834	513854	3.66146e+06	241998	1.23244e+06	2.32066e+06	248413	2.26563e+06	629687	1.44316e+06	750525	2.50042e+06	261855	766618	495283	463248	1.10275e+07	3.28671e+06	3.73586e+06	8.63575e+06	173971	119666	153051	980169	126322	871542	817972	2.43982e+06	1.57668e+06	2.20087e+06	6.21207e+06	923330	7.53432e+06	1.30607e+07	2.59718e+07	251939720	2.59295e+07	3.38981e+07	7.54279e+07	1.6767e+07
792	1.61665e+06	1.11615e+06	7.39241e+06	1.80631e+07	404361	943461	212849	480964	436329	696320	803734	3.58189e+06	117864	2.34017e+07	6.32953e+06	331221	6.94829e+06	1.57442e+06	3.00168e+06	1.17037e+06	3.03779e+06	400253	1.02116e+06	600426	509692	1.07873e+07	3.77098e+06	3.29622e+06	1.03693e+07	238532	39770.7	160822	812277	214557	932740	568676	1.87651e+06	1.44903e+06	1.11515e+06	4.20283e+06	667262	6.43481e+06	1.05079e+07	2.00825e+07	2.21088e+08	3.68869e+07	5.08231e+07	6.58088e+07	2.67075e+07
789	1.37997e+06	594014	9.22821e+06	3.47865e+07	986115	2.07951e+06	328134	235524	333233	311298	497170	2.939e+06	188990	2.26502e+07	6.37088e+06	488678	8.67502e+06	2.28538e+06	3.60528e+06	999510	5.69766e+06	495441	1.07286e+06	1.25479e+06	539278	1.21081e+07	3.15131e+06	2.92199e+06	1.21203e+07	242517	41383.6	135969	818665	186881	347373	740431	1.62221e+06	1.91306e+06	1.56765e+06	5.53177e+06	912779	8.69807e+06	1.03736e+07	2.57158e+07	2.56876e+08	3.94513e+07	6.17746e+07	5.91586e+07	2.92143e+07
765	1.19253e+06	992953	1.28051e+07	4.35595e+07	937629	3.27013e+06	905441	411899	405576	467521	535134	4.11754e+06	414742	2.01452e+07	5.82449e+06	450622	5.97242e+06	1.33771e+06	2.78112e+06	790528	4.5476e+06	401789	1.11252e+06	967293	692541	1.05472e+07	3.74671e+06	3.27831e+06	9.11167e+06	258761	95908.7	174781	617544	161207	1.31632e+06	619660	1.7461e+06	2.00911e+06	2.13253e+06	7.92261e+06	969739	8.7499e+06	1.18515e+07	2.28991e+07	2.22322e+08	2.34816e+07	4.18628e+07	6.45025e+07	3.06837e+07
795	830371	1.27082e+06	17276319	3.42382e+07	1.58234e+06	2.11337e+06	159942	686609	503128	1.42101e+06	1.27558e+06	4.48084e+06	233204	2.39027e+07	5.99254e+06	338610	8.76346e+06	1.47991e+06	3.36271e+06	824283	3.3691e+06	522116	1.04932e+06	659361	548406	1.00669e+07	2.7942e+06	2.84948e+06	9.69698e+06	252594	29550.8	256021	630836	232163	724545	784192	1.93835e+06	1.98256e+06	2.64575e+06	4.19924e+06	622721	7.70952e+06	1.48073e+07	2.69961e+07	2.49472e+08	3.51383e+07	6.97393e+07	6.40275e+07	2.62753e+07
794	897413	1.317e+06	1.75744e+07	4.16404e+07	494016	5.13513e+06	1.76093e+06	317171	234283	757143	705377	3.47916e+06	454995	2.08967e+07	5.7625e+06	322546	8.58658e+06	2.53311e+06	3.00051e+06	800905	2.99949e+06	300279	1.03156e+06	566450	692358	1.05472e+07	4.09908e+06	3.37588e+06	9.51866e+06	243947	49398.9	202144	811115	220413	2.6433e+06	660550	2.20998e+06	1.07301e+06	1.28931e+06	5.17943e+06	953863	6.85537e+06	1.4673e+07	2.41794e+07	2.37131e+08	3.24573e+07	2.444e+07	6.84214e+07	2.72262e+07
756	1.3314e+06	947334	1.36994e+07	4.76718e+07	1.03303e+06	6.27971e+06	1.08671e+06	78914.8	156627	247823	480877	2.41611e+06	184867	1.01252e+07	4.09344e+06	279158	4.93959e+06	1.13775e+06	2.19754e+06	661723	4.1522e+06	342566	877241	921419	427353	1.15078e+07	4.94727e+06	3.10825e+06	1.11197e+07	206513	44796.6	132000	834387	192755	975880	755884	1.93352e+06	2.11589e+06	1.25409e+06	4.95314e+06	783405	6.02394e+06	9.97051e+06	2.54597e+07	2.50706e+08	3.92182e+07	4.66749e+07	7.06778e+07	2.76584e+07
757	2.26075e+06	1.15976e+06	1.01224e+07	3.50607e+07	1.24336e+06	6.6092e+06	1.11666e+06	29913	81185.4	130666	202427	3.21898e+06	224543	4.98993e+06	3.20135e+06	234162	3.55485e+06	963327	2.14156e+06	696629	4.60313e+06	376200	852926	1.02685e+06	424108	1.05472e+07	4.33099e+06	3.51375e+06	9.6852e+06	199414	37903.8	112688	854485	234531	886073	494901	1.92004e+06	1.53621e+06	1.163e+06	5.08874e+06	904539	3.16029e+06	8.62695e+06	1.67537e+07	2.06279e+08	1.87024e+07	5.14869e+07	6.48588e+07	2.71397e+07
798	1.30675e+06	1.00752e+06	1.66802e+07	4.54786e+07	1.08889e+06	5.89659e+06	1.85515e+06	285903	297452	235123	249167	3.98255e+06	268004	2.47794e+07	5.86483e+06	294620	8.05592e+06	1.89751e+06	2.84936e+06	834076	3.83891e+06	377581	1.0217e+06	779904	689168	1.09074e+07	3.27653e+06	3.00121e+06	1.04944e+07	251902	22141.8	162593	667638	189088	1.06306e+06	937207	2.14274e+06	3.22923e+06	2.48069e+06	8.35936e+06	1.34453e+06	1.08834e+07	1.49417e+07	2.95567e+07	2.59344e+08	3.40892e+07	4.46837e+07	6.79464e+07	1.69399e+07
799	1.1676e+06	1.19464e+06	1.04205e+07	3.23192e+07	676322	3.28182e+06	102966	720076	532430	837877	645046	4.06923e+06	147233	3.26702e+07	8.00187e+06	244239	1.21243e+07	2.6428e+06	4.28674e+06	1.03061e+06	4.37497e+06	569983	1.59476e+06	888009	633995	1.04271e+07	4.85109e+06	4.04197e+06	1.28708e+07	381925	52687.1	169091	873747	249145	320226	761247	2.56769e+06	2.06665e+06	1.17213e+06	4.95434e+06	766047	7.46545e+06	1.31951e+07	2.59718e+07	2.53174e+08	3.96845e+07	5.13209e+07	8.57596e+07	2.64482e+07
804	1.34632e+06	1.28029e+06	1.51898e+07	4.32853e+07	1.03227e+06	7.04215e+06	1.93357e+06	456191	359371	459209	428419	4.10599e+06	206952	4.45689e+07	9.97168e+06	618778	1.30087e+07	2.77523e+06	5.00661e+06	1.15409e+06	7.33471e+06	623535	1.9308e+06	1.61764e+06	1.19746e+06	1.1868e+07	3.46719e+06	4.20647e+06	9.68291e+06	447298	47024.9	159607	803272	233959	1.20282e+06	756434	2.55357e+06	2.05712e+06	1.18471e+06	6.07982e+06	860521	7.09336e+06	1.18515e+07	2.46915e+07	2.47003e+08	3.75863e+07	4.3854e+07	8.06531e+07	15989093
805	947600	1.31667e+06	22641726	5.75414e+07	616382	4.94023e+06	1.61305e+06	408442	303854	985311	889081	3.48987e+06	368525	2.71592e+07	6.88205e+06	583126	8.05592e+06	1.49392e+06	5.32945e+06	1.19915e+06	5.33263e+06	411361	1.2411e+06	1.12999e+06	982070	1.15078e+07	8.06881e+06	3.20241e+06	1.21203e+07	285701	41444.1	135807	725808	155266	3.24063e+06	784673	2.06802e+06	2.43058e+06	1.26676e+06	7.24537e+06	1.20195e+06	7.18789e+06	1.54791e+07	2.85324e+07	2.71685e+08	3.74697e+07	3.72168e+07	6.85402e+07	3.63022e+07
758	845711	1.98009e+06	1.75744e+07	4.82201e+07	579884	3.12362e+06	336205	737312	558034	1.20564e+06	1.10124e+06	3.37222e+06	291597	3.21692e+07	8.39467e+06	404560	1.01785e+07	2.42355e+06	4.25726e+06	1.15101e+06	4.38238e+06	376757	1.32704e+06	912172	601243	1.06673e+07	6.20364e+06	2.74384e+06	1.19953e+07	311002	98474.2	159845	567565	187722	989798	936220	2.17121e+06	1.37684e+06	972997	6.56464e+06	881251	8.13236e+06	1.40012e+07	3.03248e+07	2.84025e+08	3.64206e+07	3.43959e+07	6.474e+07	2.29042e+07
760	1.10067e+06	1.38857e+06	1.48917e+07	3.83506e+07	630596	852346	68406.6	806350	699820	1.41243e+06	1.58359e+06	2.1777e+06	259348	1.20039e+07	4.32278e+06	221027	5.16844e+06	1.48082e+06	2.00586e+06	884764	2.48788e+06	272025	713114	471805	301172	1.21081e+07	3.46183e+06	2.36985e+06	1.06195e+07	166727	34778.4	261063	677680	241003	965719	797164	1.81386e+06	564579	744920	5.94778e+06	847729	1.60288e+06	1.14484e+07	2.93006e+07	2.8526e+08	4.21324e+07	4.16969e+07	5.6546e+07	2.93007e+07
808	990207	760631	1.63821e+07	2.68361e+07	1.18535e+06	2.71897e+06	1000	1.29586e+06	977850	2.03501e+06	1.80277e+06	3.86546e+06	137110	2.12724e+07	5.29448e+06	369838	4.59585e+06	1.04785e+06	2.32557e+06	717755	2.87619e+06	398136	1.16804e+06	543701	438646	9.82676e+06	7.73336e+06	4.33893e+06	9.19695e+06	279942	47448.1	678207	484699	138768	970771	861464	2.52279e+06	2.61624e+06	2.31007e+06	6.97371e+06	1.13139e+06	7.76607e+06	1.99129e+07	2.674e+07	2.59344e+08	3.09419e+07	6.49273e+07	1.05354e+08	2.61025e+07
763	1.06853e+06	940316	1.84686e+07	3.14967e+07	2.25642e+06	2.42183e+06	751070	423100	224597	753408	511698	5.06381e+06	346992	1.47594e+07	4.74746e+06	468832	4.63526e+06	923962	2.6701e+06	717019	3.35818e+06	459368	872371	651005	568957	9.46655e+06	3.99753e+06	2.8756e+06	8.40311e+06	198700	58557.7	254738	673299	204744	901111	646124	1.76368e+06	1.85305e+06	3.03287e+06	6.04964e+06	940535	1.01889e+07	1.62853e+07	2.31552e+07	2.21088e+08	3.86354e+07	7.86996e+07	6.16524e+07	1.8928e+07
762	1.39002e+06	1.07211e+06	1.57859e+07	5.53482e+07	863257	6.44939e+06	235322	329345	330005	723053	803046	1.88769e+06	217273	1.90179e+07	5.20913e+06	410199	7.25993e+06	2.1404e+06	3.08349e+06	793439	3.10365e+06	319093	1.06889e+06	594205	315948	1.15078e+07	3.51604e+06	3.7856e+06	8.79941e+06	254862	95234.1	221810	854247	229171	338082	740700	2.33624e+06	1.65515e+06	1.5242e+06	6.16354e+06	859831	6.87411e+06	1.29264e+07	2.62279e+07	2.60578e+08	3.50218e+07	4.60111e+07	8.19594e+07	2.75719e+07
809	952772	1.8886e+06	2.32379e+07	5.31549e+07	1.51784e+06	6.39838e+06	1.38972e+06	521255	221309	769064	384717	3.81369e+06	278812	2.52804e+07	6.5078e+06	510182	9.29412e+06	1.90561e+06	3.7094e+06	1.0376e+06	3.94532e+06	425352	1.15939e+06	830400	692926	9.10634e+06	3.58764e+06	2.99107e+06	9.2285e+06	273312	30129.2	146409	577111	187876	781080	760194	2.08567e+06	2.60063e+06	2.12694e+06	6.58873e+06	950388	8.66328e+06	1.57478e+07	2.57158e+07	2.26024e+08	4.1433e+07	4.98276e+07	7.12715e+07	2.23856e+07
764	1.39385e+06	1.08023e+06	1.63821e+07	3.83506e+07	483514	7.8843e+06	2.88874e+06	163634	58286.7	384533	226678	3.36819e+06	477058	5.24043e+06	3.14905e+06	250645	2.83877e+06	697415	2.20155e+06	756485	2.79355e+06	279073	836353	560425	717847	9.70669e+06	5.25586e+06	3.96775e+06	7.58852e+06	197977	88088	141824	659549	209185	3.3869e+06	396332	1.70681e+06	2.07729e+06	1.22368e+06	7.48353e+06	1.01683e+06	9.48678e+06	1.61509e+07	1.57295e+07	189002349	3.81691e+07	3.09114e+07	7.55467e+07	4.03649e+07
818	1.81738e+06	1.02606e+06	1.39975e+07	3.58832e+07	816935	2.00132e+06	427480	666726	503892	949756	958257	2.16233e+06	148737	2.01452e+07	5.51097e+06	251339	6.5757e+06	1.97836e+06	3.50102e+06	999438	2.21044e+06	372527	989931	363199	562866	1.15078e+07	5.69945e+06	3.1219e+06	7.98208e+06	241985	31816.6	160069	827113	289974	737664	536906	1.40406e+06	1.13821e+06	1.66729e+06	4.64892e+06	833039	4.37676e+06	1.33294e+07	1.98264e+07	2.23556e+08	1.6371e+07	5.79582e+07	6.21274e+07	2.88685e+07
810	1.68724e+06	782855	1.34013e+07	4.0818e+07	318466	95061	188058	584892	568955	1.07231e+06	1.33736e+06	1.54449e+06	233729	1.47594e+07	4.61417e+06	253173	5.47085e+06	1.71896e+06	2.37107e+06	722947	2.62754e+06	261983	722272	489231	387663	1.31887e+07	4.92271e+06	1.806e+06	9.5656e+06	165494	23849.4	229107	824516	230114	643984	797743	960107	708607	1.30481e+06	5.50542e+06	863768	3.02965e+06	1.30607e+07	2.98127e+07	2.87728e+08	3.15248e+07	3.34003e+07	43839226	3.12024e+07
766	1.45546e+06	1.21911e+06	1.48917e+07	4.71235e+07	483300	2.64329e+06	595156	401349	317329	740921	713279	1.76965e+06	214848	1.41332e+07	4.49845e+06	356586	5.25774e+06	1.4331e+06	2.06835e+06	917856	2.94264e+06	271478	739298	560245	383262	1.33088e+07	3.11838e+06	2.964e+06	9.47776e+06	172936	52281.1	187579	736015	224824	768411	880668	1.3346e+06	1.85786e+06	1.5634e+06	5.91144e+06	1.01268e+06	8.12545e+06	1.48073e+07	3.0837e+07	2.93898e+08	3.93348e+07	3.75486e+07	5.99898e+07	3.18074e+07
819	711747	1.58628e+06	2.20456e+07	4.41078e+07	909562	5.58123e+06	426047	650716	438409	1.14685e+06	811808	3.60455e+06	279917	2.11472e+07	5.83278e+06	424202	7.87903e+06	1.54604e+06	4.71061e+06	1.14176e+06	5.48401e+06	441696	1.30618e+06	1.22009e+06	577328	9.10634e+06	6.26011e+06	3.41245e+06	1.18702e+07	303840	35987.5	308081	557239	229320	1.07934e+06	747790	2.37819e+06	3.84659e+06	2.38623e+06	5.44394e+06	987215	6.82992e+06	1.49417e+07	2.54597e+07	2.37131e+08	4.9243e+07	4.76704e+07	8.19594e+07	1.6767e+07
821	1.38643e+06	854470	1.45936e+07	4.57527e+07	835609	5.42888e+06	703031	285360	229126	534782	582319	1.86081e+06	256691	1.41332e+07	4.52833e+06	366180	4.48292e+06	1.11359e+06	3.03852e+06	917983	6.91171e+06	384013	1.03859e+06	1.57799e+06	439448	1.23483e+07	3.06239e+06	3.7246e+06	1.18702e+07	241990	42172	204412	711741	205546	663807	832999	1.95515e+06	2.59332e+06	1.52091e+06	6.88731e+06	1.13102e+06	3.42922e+06	1.17171e+07	2.80203e+07	2.8526e+08	3.66537e+07	4.91638e+07	7.7328e+07	2.92143e+07
767	1.7789e+06	1.09986e+06	1.66802e+07	5.75414e+07	1.39496e+06	9.03484e+06	1.20039e+06	236153	226620	469112	580732	2.47704e+06	163440	1.41332e+07	4.60018e+06	333802	5.33371e+06	1.46575e+06	2.2904e+06	753178	2.9694e+06	352076	1.06468e+06	596057	458649	1.12676e+07	3.50139e+06	4.30612e+06	8.2459e+06	258933	114051	109136	898029	205518	1.09811e+06	655755	2.70568e+06	1.65967e+06	1.21389e+06	5.79055e+06	911624	7.12615e+06	1.17171e+07	2.16188e+07	2.35897e+08	3.40892e+07	4.68408e+07	8.88472e+07	2.80905e+07
355	1.65998e+06	914571	1.57859e+07	4.73977e+07	260394	2.30618e+06	4849.21	427692	506041	868702	1.4449e+06	963718	264932	2.65329e+07	6.55284e+06	375700	4.93021e+06	1.13618e+06	3.48499e+06	963888	3.80393e+06	266008	948913	778826	281225	1.30687e+07	2.95132e+06	3.35676e+06	1.00886e+07	225170	105481	231346	852384	170943	408821	785054	1.56077e+06	670523	1.2822e+06	5.69971e+06	808268	5.21204e+06	1.26576e+07	2.69961e+07	2.90196e+08	1.8003e+07	2.85883e+07	6.43838e+07	2.99922e+07
822	1.78597e+06	319057	1.01224e+07	243056	396685	1000	1000	1.566e+06	912087	2.15216e+06	1.32003e+06	2.30445e+06	195965	2.30259e+07	5.69544e+06	303833	5.65741e+06	1.19692e+06	3.44306e+06	919699	1.78186e+06	386384	959559	240467	545317	7.46823e+06	8.06322e+06	3.43517e+06	7.8193e+06	235118	26659.1	536306	507826	182927	739600	300309	1.61247e+06	728073	951569	6.32787e+06	845355	1.15872e+07	1.91067e+07	9.5841e+06	1.44576e+08	3.44389e+07	5.39758e+07	7.07965e+07	2.13483e+07
[truncated: 138 more columns]

## Sheet: maternal plasma, negative mode
samples	Cer_BS(d22:2/18:0)+HCO2	Cer-ADS(d22:0/20:2)+HCO2	Cer-AS(d24:1/16:1)+HCO2	Cer-NS(d18:1/22:0)+HCO2	Cer-NS(d18:1/24:0)+HCO2	Cer-NS(d18:1/24:1)+HCO2	Cer-NS(d18:2/24:1)+HCO2	Cer-NS(d20:3/16:1)-H	CL(14:0_18:0_22:5_22:6)-2H	CL(16:0_18:0_18:0_18:0)-2H	CL(16:0_18:0_18:0_18:0)-2H	CL(16:0_18:1_18:1_18:2)-2H	CL(16:0_18:1_20:3_20:4)-2H	CL(16:0_20:3_20:3_20:4)-2H	CL(18:0_18:0_20:4_22:6)-2H	CL(18:0_18:1_22:6_22:6)-2H	CL(18:0_20:4_22:5_22:5)-2H	CL(18:1_18:1_18:1_20:3)-2H	CL(18:1_18:2_22:6_22:6)-2H	CL(18:2_22:0_22:6_22:6)-2H	DMPE(18:2_22:6)-H	DMPE(20:3_22:4)-H	LPC(16:0)+HCO2	LPC(16:1)+HCO2	LPC(18:0)+HCO2	LPC(18:1)+HCO2	LPC(18:2)+HCO2	LPC(20:3)+HCO2	LPC(20:4)+HCO2	LPC(22:6)+HCO2	LPE(16:0)-H	LPE(18:0)-H	LPE(18:1)-H	LPE(18:2)-H	LPE(20:4)-H	LPE(22:6)-H	MGDG(16:0_18:0)+HCO2	MGDG(16:0_18:2)+HCO2	MGDG(18:0_18:1)+HCO2	MGDG(18:0_18:2)+HCO2	MGDG(18:0_20:0)+HCO2	MGDG(18:0_20:1)+HCO2	MGDG(18:0_20:3)+HCO2	MGDG(18:1_18:2)+HCO2	MGDG(18:2_22:6)+HCO2	MGDG(20:4_22:6)+HCO2	MGDG(22:6_22:6)+HCO2	OxCL(16:0_18:2(OOH)2_18:2_18:2)-2H	OxCL(16:0_18:3(OOH)2_20:3_20:4)-2H
2	15130.7	43372.1	114858	114593	478665	182233	22366.7	35658.5	3.20711e+06	105284	23420.5	27952.5	215263	892509	718084	258079	224420	218450	140368	28506	262891	246266	5.69995e+06	57623.8	249965	711862	527533	51061.7	162691	72570.6	128360	3.41538e+06	9746.01	51578	19458.4	37361.4	47088.3	110615	52664.2	4.87353e+06	552008	1.10449e+06	697370	231677	3.38986e+06	26678.8	815288	723129	248141
549	14131.7	31562.1	93769.4	104985	330998	125567	19442	22732.2	2.53089e+06	141504	37159.4	24131.7	172322	724981	607637	151859	166784	474162	15110.7	18292.2	247335	139352	3.68965e+06	43552.2	236574	126810	511904	51999.3	144240	19855.3	134501	2.00928e+06	71839.9	130074	106616	68729	47722.8	106521	19149.2	4.45289e+06	1000	1.34743e+06	433113	116621	3.21076e+06	31739.9	451589	830083	436254
548	22703.8	48796.1	146429	168374	564416	263961	38976	32439.5	3.69428e+06	64332	18153.6	18653.4	248866	899099	602151	281554	270951	203829	181545	33412.1	146477	334624	5.33953e+06	44814	1.57046e+06	797344	883661	43022.1	157710	89338.5	101662	2.57694e+06	17762.5	137160	90661.8	120485	53468.1	120493	109596	3.76384e+06	1000	668748	645748	799532	3.54718e+06	50672.5	779406	627428	126280
551	5154.05	19529.2	22620.8	31978	97888.3	71998.8	20448.8	11712.5	1.74089e+06	29087.2	6372.07	24161.7	100050	683632	86239.2	78063.5	74332.9	1000	20569.8	3416.35	159362	391130	3.25511e+06	162176	257309	963804	1.30726e+06	262633	1.19266e+06	155077	72830.5	1.9756e+06	90842.9	100086	262757	286857	17854.5	44489.4	1000	4.8533e+06	183201	1.08608e+06	1000	1000	1.50142e+06	1000	397262	222403	15295.3
550	12344.8	67283.4	166467	161929	506046	258655	42008.1	24453.3	3.37231e+06	96097.6	24549.7	22705.9	234928	859267	711985	191584	273895	379577	124937	35961.3	111700	264247	6.93107e+06	30635.5	2.20462e+06	951279	702142	44029.9	168825	68419.5	192993	4.47558e+06	26577.9	98285.4	77590.2	76344	50785.6	130568	58967.1	4.40413e+06	1000	757718	618077	248558	3.53356e+06	48642	662218	840994	399512
555	11969.3	52194.6	128519	104831	331226	170665	34594	12085.8	2.62273e+06	108267	24615.8	25193.8	177362	673595	540269	183757	248829	255959	97179.4	18531.6	272635	196889	2.63912e+06	15902.7	864973	531746	484471	54628.6	141237	54785.8	52922.3	1.62304e+06	16648	73453.8	66947.9	71369.8	41263.7	79226.2	35451.5	5.27835e+06	213435	1.25537e+06	802439	365226	2.98123e+06	43858.8	658525	568677	122920
40	10755.4	37025.1	149384	143521	529238	225054	33161.6	31172.4	2.54763e+06	64957.8	23060.6	26547.1	165500	793553	458629	141807	183443	145365	83565.1	14358.7	198658	161423	2.89835e+06	48983.5	851376	542786	566855	62836.5	117845	39127.1	64262.3	1.74302e+06	26402.8	94366.5	43018.7	57235.5	40983.1	78211.3	12207.3	4.47516e+06	153816	1.21945e+06	501210	257423	3.00149e+06	21669.1	532745	571568	108969
556	6311.93	24501	29992.4	38353.4	132268	62685	16432.2	8287.16	2.01015e+06	42792.9	8758.79	32855.4	131379	1.38199e+06	80808	68450.1	109410	1000	29381.5	5108.2	154230	332694	3.3058e+06	179947	260143	896111	820063	160994	610351	124316	61413.5	1.92967e+06	3306.08	46040.4	103383	134928	19148.1	61901.3	1000	4.67711e+06	321824	1.29101e+06	518685	141622	1.70375e+06	1000	615097	251152	27241.2
41	15316.6	40532.4	101137	106364	356855	141365	20294.4	34509.7	2.51656e+06	93307.3	27432.3	26523.3	168072	848831	452104	155168	196472	146919	1000	14483.2	247574	117357	2.23034e+06	34172.5	255877	461412	588208	45117.4	64018.4	21086.2	1000	1.47208e+06	16201.9	136921	27034.9	31451.6	43729.5	92575.1	18388.6	3.53837e+06	364101	1.53924e+06	372853	147968	3.05086e+06	37946.1	490563	749236	146749
562	14246.1	68346.9	205883	190529	578359	232962	34024.8	33074.2	3.05284e+06	68958.2	21065	26989.7	187244	654194	615065	232399	327141	292936	105207	53688.2	290349	385615	5.69151e+06	95888.5	1.54512e+06	862085	848794	89863.1	298785	109828	113067	3.73376e+06	63805.6	110758	109030	139242	46356.1	113707	65916.3	5.93002e+06	521017	1.38099e+06	803298	630444	3.20422e+06	52397.3	838942	638145	224991
43	4730.22	13237.5	15644.7	27058.2	100597	44465	11983.9	7086.17	1.18024e+06	31626.6	4716.97	18423.5	59454.4	253467	177984	49898.3	40178.8	1000	1349.63	1000	106960	100181	2.50231e+06	97697.8	848878	568539	584642	80004.1	453404	99987.3	76029.6	1.67261e+06	64291.2	1000	66440	114827	13880.8	18283.6	1000	2.84712e+06	1000	512957	631723	1000	1.2208e+06	1000	521248	204136	22557.9
564	11663.8	38537.6	93968.3	95617.2	357708	132527	20331.2	20122	2.85212e+06	110740	24480.6	30202.8	195524	834710	644661	193412	191498	348524	100679	18351.3	193541	322256	4.58514e+06	19204.5	1.31192e+06	579991	674218	40321.1	186731	62719.5	130824	3.02512e+06	31365.9	127268	86926.9	90158.9	49710.5	113024	22373.8	5.27294e+06	478987	914696	569522	290442	3.42359e+06	31218.3	647318	831426	410748
567	32613.6	61465.9	158023	133380	482512	248980	37159.6	19830.4	1.907e+06	141551	34761.5	21890.9	98925	293604	1.16958e+06	180060	236245	690882	93318.4	29480.1	254337	1000	5.71904e+06	76977.3	241650	529515	461850	65578.9	253085	49135.5	151714	3.7775e+06	47900.9	85405.9	132274	114428	49412.1	57466.9	24656.3	8.02927e+06	316180	1.67564e+06	676251	423654	3.13777e+06	81276	595690	905825	904759
566	23749.9	74099.4	192787	166517	520684	230276	36554	28630.3	2.89629e+06	61290.4	17313.3	24109.2	173250	571573	751974	213049	300692	269862	82173.4	50536.1	316851	412157	4.8047e+06	28200.3	1.4603e+06	638057	541600	62653.1	306762	85946.9	78865.5	2.85196e+06	10567.9	17095	85868.1	111953	41541.8	85103.4	88199.9	7.07662e+06	232598	1.4715e+06	872410	1.28429e+06	2.92399e+06	47592.2	706581	577815	399611
52	16419	64756.4	163401	164466	557740	269607	45274.2	21502.4	2.6961e+06	99350.3	21916.9	19864.1	164114	708067	540796	133935	171529	319631	60607.9	36228.3	199658	308407	2.66504e+06	12383.2	243517	488144	406491	44502.5	101631	29727.2	50984	1.78764e+06	56822.8	74501.9	41198.7	34457.4	44818.8	72643.9	30187.5	6.41732e+06	369397	1.90977e+06	784892	311340	3.1379e+06	44284.1	603590	746451	484146
569	9195.31	24337.3	64217.6	60569.4	205797	112940	19237.8	56105.9	2.82793e+06	92069.4	17880.1	18866.5	218633	1.41072e+06	354083	127898	138559	1000	86844.9	3820.72	152442	1000	3.44794e+06	29865.9	249325	617312	303161	11490.7	99842.7	12466.6	90605.9	2.35699e+06	57291.2	23263.3	49833.5	25328	33834.6	106263	1000	3.09026e+06	232775	646848	502427	134759	2.67596e+06	1000	357592	586008	177757
573	13452.3	48235	139642	129654	428368	214350	34515.5	32024.2	2.7751e+06	67266.4	20436.9	28603.9	185626	861474	586225	167286	200867	384411	110472	11359.1	204280	272032	1.80234e+06	20935.1	662342	321741	220501	23185.2	52563	15790.4	54137.4	1.41155e+06	40714	46032.1	24535.6	18993.5	46193.2	81382.5	9422.74	4.56427e+06	1000	807199	594749	380494	3.1593e+06	13456.8	721521	678908	252971
124	16655.7	36185.9	139236	139543	504547	200335	31216.7	14378.7	2.51124e+06	127805	27823.2	23746.7	155860	530305	712037	188859	191740	471908	100903	19744.5	206037	239580	2.54328e+06	40813.8	688692	436342	391335	32543.7	104588	26144.8	79703.3	1.87856e+06	7984.51	78690.5	52706.1	62876.9	44771.3	89453.8	15580.7	6.15336e+06	293658	889093	707929	266494	3.06586e+06	19206.5	500814	730528	461154
574	24045.2	53229.7	148145	131839	492498	209731	29594.7	24015.8	2.82342e+06	89708.2	24360.1	30696	175484	888048	948409	264041	266591	279553	148890	16043.4	197887	237547	3.32419e+06	15796.3	959705	494763	400842	40761.7	106567	93012.8	83821.5	2.36393e+06	46284.6	73266.7	63838.7	141637	46826	95200.6	36705.6	4.26743e+06	365705	880108	947279	1.02788e+06	3.17803e+06	14445	1.12864e+06	732474	206684
575	16127	70720.2	173936	152163	472219	190540	32939.1	30409.7	3.54453e+06	107319	26325.4	27402.3	223946	728295	747515	220758	502652	436444	118153	51143.9	385456	372424	2.92504e+06	12234.6	1.09428e+06	481492	470928	9040.12	168174	2010.34	76510.3	2.00937e+06	47931.9	97298.9	112257	85917.9	45751.8	9964.98	148185	6.74512e+06	648690	1.67708e+06	827090	344492	2.98848e+06	50471.9	595603	704897	461860
576	21434.7	71986.5	197001	165807	742947	257669	36267.1	55429.9	3.3179e+06	142569	22448.1	28280.4	211589	944164	740534	216833	277382	234454	9609.49	17972	279567	26096.7	5.43494e+06	31793.6	1.39812e+06	649666	439888	22385.7	85766	24281.5	144930	3.35864e+06	71431.8	86788	33803.9	57523	58929.3	124299	39222.3	2.97307e+06	669483	820389	725127	247104	3.54893e+06	55974.3	748291	1.06061e+06	93832.1
578	22940.1	59037.9	166347	147675	549694	214577	31025.4	26689.6	3.13715e+06	123034	30777	33587.7	195626	814622	1.16601e+06	266946	271219	490909	165684	40932.5	336230	313965	4.79491e+06	27245.7	1.25119e+06	595997	538149	67373.5	167500	97953.7	130295	3.42745e+06	32556.2	94845.5	79518.9	123168	45688.4	1000	58302.4	5.57295e+06	693797	1906811	908264	731250	3.11712e+06	28466	965070	859310	414599
249	13790.7	59471.3	138998	168962	515620	241381	37871.2	14747.3	3.45151e+06	79487	23865.8	25297.3	209831	785705	731641	300389	296304	287176	148717	46667.6	334401	288431	3.29961e+06	19707.2	1.18276e+06	594034	395846	38132.8	105858	65536.2	71711.3	2.39779e+06	35350.4	68044.5	35596.5	59077.2	52977	98712.2	96254.2	4.6296e+06	874305	1.26105e+06	766174	376776	3.15202e+06	53641.5	830896	779320	257198
579	11229.5	53126.1	145433	158602	562828	267156	43325.5	32686.8	2.89147e+06	98068.9	23463.5	38609.8	187455	703172	912577	166014	254959	317410	1000	21630.3	242818	299065	2.22476e+06	18316.9	720195	323056	295054	26629.6	80027	27547	46000.5	1.70338e+06	26940	57233.8	17406.9	73409.2	56784.6	80653.8	25844.3	4.7845e+06	392209	992377	715490	397448	3.51791e+06	11256.8	806605	883430	344968
331	19840.6	53647.9	141488	140296	500394	187418	23392.4	37248.8	3.13398e+06	130006	26165.6	28386.9	200971	938759	690362	206213	229700	288446	120398	32613.4	234386	201465	2.97351e+06	21829.7	981974	571053	318058	32609	83172.6	37175.4	61347.7	2.30595e+06	64683.2	4043.53	20899.4	28933.4	51979.1	113806	21982	4.68684e+06	296250	1.12313e+06	716413	281655	3.23515e+06	20918.5	741014	851978	298992
332	4997.86	18466.1	19790.6	26925.5	109518	39629.1	10316.9	5252.31	1.58801e+06	29914.1	4757.84	30537.7	106422	354714	81413.6	54829.8	63247.8	1000	17705.3	1000	118857	43271.1	3.31484e+06	184436	242890	882882	728015	181180	539072	123957	88092.4	2.30654e+06	144789	57733.7	124335	174724	16221.8	45077.2	1000	3.15579e+06	1000	1.12063e+06	278995	35964.4	1.3568e+06	1000	436381	227570	1000
583	19574.9	62538.8	193141	192428	590677	242742	40487.1	27855.4	2.74776e+06	107771	27991.6	34771.8	171884	659935	554995	153810	298756	332692	69649.3	28949.3	240800	269549	1.84723e+06	23047.4	676341	370153	438403	43235.4	106982	7486.04	37172.3	1.5267e+06	12501	106000	70234.6	78058.5	54135.3	82600.8	40549.4	5.53862e+06	340146	1.44002e+06	563798	256920	3.2966e+06	19279.8	437300	877688	377229
581	27757.5	51433.4	141942	132283	485544	207474	27681.6	32077.1	2.90421e+06	103741	33748.6	18663.4	156603	578881	963094	308416	297097	381310	194089	38486.3	339670	115994	5.68728e+06	44081.2	1.35583e+06	118578	767635	33993	157346	78039.6	133555	4.16576e+06	14504.4	161106	107333	147876	58316.2	98060.1	58637.8	5.08233e+06	672031	1.55132e+06	696259	932884	3.37932e+06	72496	766461	953412	314582
333	12342.6	44637.8	111058	118369	424823	201272	34149.6	18254.2	2.93492e+06	109413	21284	32728	200730	1.01768e+06	556538	149016	198178	147074	86751.8	13610.1	203362	234851	2.63888e+06	22626.3	853460	424758	209966	22473.8	77446.4	22241	58053.8	2.08588e+06	32023.8	23522	9488.63	8741.38	45070.6	113093	18774.4	4.50859e+06	261437	635981	520296	165690	2.95969e+06	1000	557225	720777	236092
585	11741.2	44918	166217	147448	495193	190371	37773.2	7862.97	2.74584e+06	79377.5	19714.4	32264.3	165515	753901	607062	171286	173329	186276	92063.7	12841.3	225111	248325	3.58014e+06	35147.7	939607	113303	508924	43276.7	155108	38186	67500.4	2.69284e+06	6101.31	72846.4	35000.5	70222	49134.1	93612.8	6622.13	5.33068e+06	59045.2	934510	574866	264587	3.04945e+06	22215.3	546406	686429	254357
586	19744.7	53462.9	160516	137301	418926	230121	45437	23145.4	2.59558e+06	116299	30220.5	32741.2	168702	962169	641441	155603	239791	307439	6282.87	10148.2	233809	274206	1.4649e+06	20415.4	592449	300752	270008	22252.7	27624.3	5126.09	42813.2	1.27088e+06	42199.9	52695.7	28780.3	31829.7	58342.5	65884.2	11987.2	4.17278e+06	243682	970115	468681	319975	3.38745e+06	1193.24	559014	936813	265444
343	7017.61	15089.3	16536.9	32759.8	123754	53895.1	15257.8	8951.62	1.65134e+06	42779.2	5432.83	5688.9	106177	395456	168105	85027.9	64175.1	1000	27934.2	1216.57	111648	172057	2.74983e+06	120605	830680	801894	871904	201706	576940	90445.2	69772.9	2.31682e+06	107652	69996.9	135939	162969	18832.2	41638.6	1000	3.43356e+06	43003.4	1.11646e+06	259464	67449.5	1.46004e+06	1000	385101	255949	85483.6
590	12639.8	36109.6	128671	129705	373634	207627	29380.4	23361.8	2.78341e+06	120341	22466.6	25454.3	173930	1.00142e+06	851960	238543	204918	240586	121195	11730.4	184783	270828	1.78667e+06	9061.57	663689	374034	376228	26032.8	71249.7	33021.3	73537.8	1.63867e+06	67185.2	65719.3	22554.6	31272.4	45640.3	90594.5	8723.01	4.9108e+06	505211	786741	790868	1.01517e+06	2.90569e+06	13251.4	939081	764202	218809
587	20679.5	51226.6	172572	153183	508999	239051	41688.1	30947.4	2.92106e+06	124149	15623.6	29372.8	196298	970633	779451	230766	272606	424420	113808	22039	217491	220687	7.13972e+06	102833	1.60229e+06	823071	659094	77031.5	215989	104733	190195	5.02004e+06	89724.3	128429	108992	147805	44109.8	97725	39464.8	4.88727e+06	516794	1.47509e+06	841761	527651	2.86827e+06	14802	765430	838587	299749
588	12538	45543.6	152948	148252	541955	242032	40398.5	24570.8	2.97542e+06	97820.2	25546.8	29643	172386	642815	761720	206508	233199	416688	128344	36768.3	308002	215811	6.78769e+06	69226.1	1.72401e+06	939546	926910	84174	297121	77943.6	159662	5.11673e+06	59875.4	141088	125972	138403	53318.4	88719	73633.1	6.655e+06	659340	1.38452e+06	799562	274123	3.04741e+06	62775.8	609393	852556	418233
596	22304.1	60825.2	151323	135510	537777	207974	29779.4	40056.7	2.73012e+06	84925.9	23465.7	25865.1	155411	785440	1.03942e+06	246717	240288	382314	131178	17906.1	207445	212088	3.20738e+06	6438.14	980191	127545	431738	37302.3	85103.1	56189.2	74922.5	2.34533e+06	37953.9	70182.4	33432.2	84592.7	52275.4	80758.9	26743.8	4.89098e+06	507502	1.28954e+06	767602	957964	3.04688e+06	40555.9	824020	887508	415135
348	25359.2	54603.4	140531	143106	514530	183134	26574.1	21184.1	3.03723e+06	96282.1	25842.8	26686.6	182354	933247	595088	215364	270078	303944	123240	21680.2	228218	230043	6.00427e+06	55706	1.60281e+06	752958	524315	60550.6	187365	58103.5	126751	4.4546e+06	13219.3	57835.6	34293.1	39990.7	40631.9	91874.6	31864.5	5.60249e+06	376537	1.49086e+06	759162	392793	2.90798e+06	23691	630914	741262	217713
593	21937.5	47590.6	145096	127242	482991	181747	30063.8	40333	2.388e+06	112593	27667.1	24087.7	128208	603407	884638	256535	196754	460624	121649	18536.9	192711	248972	5.45641e+06	47885.1	1.21669e+06	544885	544034	53624.8	175404	61357.5	145294	4.10769e+06	41598	92609.8	56353.8	87462.7	50303.5	59655	11669.5	6.72849e+06	226747	1.38668e+06	723232	561613	3.05111e+06	30519.1	667031	873803	529572
349	11128.5	63029	175223	156614	477531	254801	39534.5	13720.9	2.56369e+06	107267	20037.3	31331.1	164299	865478	700500	287756	215401	306740	148918	17101.3	208599	362207	5.275e+06	21809.9	1.23236e+06	621624	461313	42310.2	179661	46110.6	111309	4.07498e+06	28629.2	50208	40155.8	33690.1	49801.5	1000	26428	6.69144e+06	589237	819368	794239	415157	2.92123e+06	7587.77	626045	784841	454904
598	10015.1	57165.5	140281	138147	389348	297314	53465.6	13030.6	3.28605e+06	124214	25105.1	38347.1	185589	764842	1.033e+06	266951	230883	492725	121455	44061.5	251730	389211	2.43614e+06	10593.8	823362	395829	207971	21267.3	85351.3	28743.8	70186	2.08037e+06	31234.8	1551.1	2167.54	22216.8	56143.2	1000	70875.6	6.61904e+06	1000	1.0069e+06	837115	287710	3.0967e+06	17233.8	852631	916781	647895
615	4196.27	17632.7	9943.94	23350.5	77422	35327.1	14151.1	7975.3	857690	32775.2	5238	11912.6	29391.3	1000	122199	50579.9	33904.1	1000	47244.8	1000	68127.1	167352	1.93923e+06	110328	442207	310034	527095	153426	722432	45984.1	52179.2	1.24454e+06	46524.6	47145.6	156404	169451	6735.85	49505.4	1000	2.25768e+06	1000	732458	472019	19257.5	559318	1000	314515	34289.7	394538
603	15367.5	38350.6	109611	98424.8	359397	163423	25720.1	9406.08	2.89608e+06	115701	25357.6	20797.2	154755	659019	1.26479e+06	243571	269683	419848	156201	25439.6	412067	380201	3.67549e+06	78101.7	788731	356482	547893	52092.3	169154	91395.8	100834	2.00713e+06	32767.1	64815.3	52777	118791	42495.7	28372.2	40403.1	5.76033e+06	557814	1.18302e+06	897899	1.1219e+06	3.29179e+06	56494.6	1.11316e+06	619771	191374
601	20469.2	90401.3	258801	238918	695244	318562	53851.7	44392.6	3.45295e+06	110012	29204.3	22658	233949	794338	771140	218231	345751	468140	40552.3	37733.4	258254	417306	5.51864e+06	66887.3	1.19921e+06	663271	658206	52070.6	265707	60546.9	135538	2.70451e+06	77198.1	91067	93208.3	87372.6	46275.1	31015.1	76976.7	5.49756e+06	279334	893835	755062	292791	3.56851e+06	54628.8	618498	696571	826430
350	23303.5	44874.1	141116	122895	450381	161837	26858.2	27601.4	2.12304e+06	90120.7	23934.7	23122.8	153260	536542	386074	80794.7	23403.6	31937.1	50112.9	14228.3	193420	224789	2.41976e+06	64894.7	492044	299420	480396	64087.8	52107.3	21853.7	63059	1.42856e+06	23637.5	117219	52098.8	57152.4	39300.3	31996.4	20332.7	3.17518e+06	20335.1	1.13413e+06	543260	159258	3.22616e+06	1000	443153	603098	533618
618	22970	43954.7	119708	113475	430423	159631	22811.6	9069.5	2.66441e+06	111996	19199.3	24091.9	190654	816667	613533	218349	241648	35375.4	153041	15711.6	206896	54039.1	3.76594e+06	50195.3	841146	555726	560557	46383.1	95766.3	61147.3	86278.3	2.17203e+06	18149.7	79955.1	43708.8	74896.5	39770.5	29994.2	18507	4.11049e+06	231163	1.05353e+06	660512	503152	3.21611e+06	19370.8	855418	584404	196810
625	7663.92	22152.8	64510.8	78451.5	246990	114153	20474	11803	2.07501e+06	82878	17128.9	23085.3	144675	554263	440480	182471	159849	19971	154619	21334.8	161849	1000	2.55045e+06	25977.5	74322.7	320248	447544	29739.3	47000	27108.7	57891	1.67474e+06	62281.1	78499.4	45827.9	65304.3	40579.5	25349.5	13812.6	3.65906e+06	1000	830600	561546	147763	2.99442e+06	1000	610142	547091	185981
622	18374.6	44988.6	124248	117875	480321	175286	25128.2	10634	2.74979e+06	69499	21812.4	27228.9	182237	850728	512267	193634	228846	145108	128805	17902.4	210646	132336	2.76225e+06	17896.7	729299	1000	404186	21961.9	56869.9	49508.1	66208.2	1.7244e+06	47333.1	101431	48530	95447.3	43683.9	114559	23199.2	4.24563e+06	405632	1.4577e+06	744854	813438	3.33958e+06	46305.1	895631	626219	194290
447	19439.3	56502	128712	117937	433639	169009	27988.1	34023.1	2.82502e+06	71037.6	16832.4	23634.7	206380	875764	349391	175367	250714	40246.6	121317	18754.1	228798	153755	2.22906e+06	21088.4	677042	340576	381559	36692.8	88187.4	28264.2	5972.37	1.52927e+06	26284.4	52084.4	6210.29	43039	43763.6	125075	30686.4	4.58229e+06	296592	1.03058e+06	647264	148379	3.12109e+06	11576	549807	563015	222222
624	25423.2	67328.2	207532	210740	636121	298032	41837.9	32381	3.2705e+06	140308	30473.2	24445.5	195168	793800	907864	248100	345438	473456	37836.1	46735.4	263978	120351	3.42568e+06	58054.4	865977	685360	977840	14974.9	165973	79551.7	95334.1	2.07636e+06	30969.6	189770	110084	130788	45846.5	129801	113374	5.82778e+06	632215	1.30013e+06	819403	275457	3.26425e+06	69138.8	738718	869837	230692
627	13782.8	63400.5	171675	158089	458224	303074	45004.5	28629.6	3.22309e+06	96798.2	25252.6	35224.4	215213	918879	880491	209990	269381	447897	147111	34637.5	234299	331401	2.30829e+06	35855.4	510654	291991	350291	10064	79034	26554.6	52772.2	1.61746e+06	28531.1	62712.8	51798.2	68405.9	49477.1	113225	57981.8	5.38534e+06	876124	982858	700787	328561	3.51206e+06	37481.6	745206	874684	233018
632	8663.7	32353	80748.5	85288.2	278611	115758	20427.8	16470.6	2.45912e+06	59252	13253.1	23928.4	172418	756409	368062	165596	163041	31321.1	133594	10233.7	166476	280339	3.957e+06	8276.94	1.01142e+06	565839	591830	41759.1	119484	58959.5	62938.2	2.72821e+06	55657.7	53302.5	1709.01	41913.8	41164.3	112185	16034.7	3.40226e+06	348274	858766	695826	350516	2.92441e+06	7029.95	672604	554742	175642
630	12875.2	43177.3	123907	121393	394909	188205	32866.9	31706.4	3.36436e+06	142944	27845.9	30554.1	231754	971664	720035	169778	273554	393291	121393	26292.5	284466	225178	4.05065e+06	28556.6	1.02019e+06	521113	293382	40609.5	112051	24323.6	112153	2.55248e+06	70568	32956.8	11134.3	34150.7	43853.1	128510	45123.6	4.44929e+06	483455	1.11711e+06	673743	215767	2.98752e+06	22979.5	584481	789723	217129
477	11328.2	41465.6	118854	110613	381395	213667	39831.8	30776.1	3.02664e+06	75242.1	20875.1	28021.3	194770	905999	747548	179843	240980	307994	47021.7	22199	238444	337728	2.80788e+06	22678.3	586206	317807	448757	37171.7	82147.6	53924	77222.4	1.92671e+06	17694.7	70200	46389.7	97763	43853	114989	31612	4.95098e+06	533718	914480	861077	775160	3.19023e+06	33438.6	902580	639274	228563
631a	13062.6	57301.4	139773	128947	420523	192338	28589.1	29970.2	3.56328e+06	148319	31425.3	26753	209740	815291	1.07187e+06	193467	427678	503759	40307.2	51138.8	352319	374463	2.77945e+06	21640.5	734743	388509	371053	32550.2	79386.5	42971.4	87797.2	1.89718e+06	20769.3	63351.1	45576.8	22751.9	50751.3	133505	165474	6.1213e+06	787187	1.63627e+06	758768	390634	2.89144e+06	65255	708542	879588	222827
637	30063.6	36458	126143	125000	427262	163052	25079.4	19627.3	2.58996e+06	186691	44228.4	20209.4	147562	767154	743139	128843	223124	707058	45347.4	21602.8	206592	89096.3	7.14408e+06	78663.7	1.65555e+06	762330	622575	163127	377689	87779.6	275977	4.30129e+06	46608.5	155562	176053	153966	36996.8	97401.8	30160.9	6.28446e+06	275907	1.90263e+06	651780	263994	2.76505e+06	10720.7	566066	882684	282522
638	14933.1	59204.6	203410	179360	681586	326075	57156.2	23114.6	3.36188e+06	94624.5	26195.8	38693.5	200219	784186	951789	216628	234253	376905	39868.9	31483.7	295334	262238	6.42623e+06	93651.8	1.22083e+06	589768	594917	60440	213358	67569.5	144560	4.57527e+06	56221.8	61789	46504.3	63252.6	57888.6	131368	51037.7	5.62355e+06	1000	1.38244e+06	886952	313665	3.53734e+06	44705.7	748772	911548	250423
635	21259.1	48374.2	122480	134858	505405	180614	28541.5	10208.6	2.743e+06	131269	32497.9	28727.7	146562	730176	1.0352e+06	188734	215119	660794	43254.7	19905.7	197373	116166	3.40347e+06	26523.4	710591	400942	566765	62638.6	215611	58770.5	117500	2.41391e+06	79962.5	118887	113501	134429	49498.2	21276.4	29556.7	7.39951e+06	356669	1.25407e+06	762753	259848	3.09472e+06	29540.7	627239	866722	289976
640	17313.4	64166.9	151619	129832	484045	208269	33227.4	18720.5	2.82125e+06	93047	19668.2	22588.4	159940	793098	833070	324545	288846	300746	179746	27471.9	250279	107412	2.20731e+06	35139.6	475016	239046	314631	26831.1	87420	42308.3	48602.5	1.70116e+06	44772.5	43870.2	40954.7	93107.6	50919	110388	34005.9	6.56028e+06	432190	1.00653e+06	125236	719510	3.08784e+06	25654.3	834301	662349	285734
641	7235.13	22576.9	59442.9	79098.1	208986	120421	24859.2	38563.7	2.81341e+06	110085	25165	34285.8	180897	992823	883825	206498	175173	424486	39572.9	21962.2	231126	182811	4.34762e+06	29660.7	1.53383e+06	802745	506898	55666.9	203591	37446.1	111357	2.87887e+06	118894	96120.5	113092	156012	46298.4	50223.8	31577.6	4.88868e+06	346987	1.39442e+06	155992	303214	2.9924e+06	15770.6	569381	957299	224091
642	13666.6	35380.5	99029.7	88011.7	348349	150672	21501.5	17454.6	2.982e+06	123453	22595.5	14098.8	201871	1.03073e+06	752752	233160	186399	304802	176433	23643.8	196698	130289	4.41464e+06	35567	1.024e+06	688907	695872	37010.4	120342	75740.7	130108	3.11175e+06	21637.9	105718	1404.76	80014.4	44158.1	115292	15278.5	3.79334e+06	1000	688366	670468	946706	3.15368e+06	18510.1	796873	886572	207609
486	13696.3	70462.2	211269	174457	599493	340739	56476.5	16011.3	3.27644e+06	96869.5	23382.3	33115.1	213024	853001	788708	201631	244898	354863	127754	36772.6	282741	165192	3.3722e+06	31744.5	682884	449829	368503	38690.6	95018.5	44960.6	71862.1	2.63954e+06	50756.7	54062.8	50974.8	64201.3	48393.1	35286.6	43909.2	5.56074e+06	1000	1.15758e+06	931995	437837	3.11481e+06	30699.1	777493	759331	251051
645	23767.3	30404.4	104570	119942	420476	174320	29082.9	26342.7	2.45212e+06	72232.5	17288.4	27309.4	146667	713518	697898	213778	129686	328361	128749	13355.1	172632	389774	3.85385e+06	35900	1.04509e+06	376282	370709	41082	260793	40827.6	81836.7	2.98588e+06	49922.5	24308.7	76474.4	71482.9	38637.5	105799	17327.7	6.77039e+06	123166	1.61837e+06	728243	208462	2.81122e+06	1000	749131	650535	283046
646	10800.5	55685.1	119733	102418	315600	222287	44454.9	17527.5	3.38791e+06	114597	24607.7	28750.4	228902	1.07011e+06	680981	154103	248560	391152	43467.1	23015.5	290763	158991	4.77772e+06	32093.4	1.14124e+06	659537	546815	74787.8	204498	64516.3	147546	3.35096e+06	45996.8	65379.8	54051	3386.68	44662.2	50401.3	52060.8	5.1651e+06	583937	1.17905e+06	774554	245508	2.78891e+06	20575.7	659621	712939	253524
647	13812.1	48780.1	120526	112112	398945	199922	27346	32200.1	2.53905e+06	110718	22346.3	25413.5	155409	687348	1.00299e+06	288009	208116	397487	207522	31845	166519	1000	4.54904e+06	46932	1.12064e+06	571557	400517	30106.7	139235	60201.3	147143	3.16619e+06	18418.9	42974	55236.9	106116	44182.8	106948	23859	5.09984e+06	379389	794934	769930	1.27086e+06	2.89606e+06	29696.3	892184	722484	244053
516	10488.4	39206.1	128229	108575	391519	209426	38886.6	19668.4	2.6874e+06	92136.2	22122.6	31148.3	180186	832543	631452	168624	156557	326862	108851	15752	205467	125688	2.38363e+06	29049.5	664744	185337	259952	25571.8	76125.4	27836.1	58256.8	1.92639e+06	29639.6	24986.9	11278.6	10833.6	44531.5	36666.7	19314.1	5.95375e+06	254717	1.20397e+06	584342	216640	3.04137e+06	1000	585448	714793	276993
648	19072.1	65000.5	195997	191884	653022	210128	29108.9	41178.8	2.84886e+06	69271.8	17719.5	20944.1	186455	904866	681327	464331	250180	183086	248065	22857.1	193338	303068	1.0161e+07	48692.7	3.44385e+06	1.39247e+06	1.07329e+06	110827	451665	168011	201604	7.2634e+06	34505.1	79900.8	72574.3	144036	46764.5	111409	18609.7	4.28311e+06	474971	946633	798234	1.28115e+06	3.05696e+06	44487.5	773750	756381	219944
649	4889.82	13706.3	7761.42	29617.6	111071	58106	16836.6	8589.34	1.3374e+06	29163.8	4839	29594.7	75499.1	1000	56532	60591.3	68660.7	1000	61429.2	1000	122185	264431	4.63071e+06	255150	1.30503e+06	880952	1.05106e+06	263577	1.14483e+06	202690	124212	3.62186e+06	174766	58513.4	185139	265052	6293.03	65811.5	10167.3	3.05655e+06	26458.2	1.07185e+06	755705	71421.6	500753	1000	559524	70200.3	498520
650	12083	43654.2	123002	117498	352204	186255	33455	14084.9	2.93995e+06	48257	17066.3	26501.4	186932	880719	264496	125508	263529	40298.9	49037.6	15221.6	254719	372914	4.40789e+06	64994.6	902249	450263	489577	51063.3	185520	25815.5	27259.6	3.43519e+06	52071.5	63152.1	52044.7	38658	52776.9	39429.7	30532.3	5.67117e+06	377687	1.07248e+06	617183	500300	3.24523e+06	6426.71	480333	611952	254415
543	12105.9	42693.3	160510	133757	487131	203781	30691.6	36568.9	2.52815e+06	122944	26247.4	30043.1	150196	758695	731622	150893	199536	398978	109402	18065.3	207008	298402	2.2203e+06	25983	437616	184312	262124	20291.6	47298.5	34303.2	62827	1.73921e+06	22944	46742.4	14214.9	37165.8	46169.1	104930	23271	4.96976e+06	284799	1.09861e+06	648958	348409	3.03606e+06	2527.08	611196	808979	253011
653	12254.1	42638.8	98915.8	95037.3	320087	144764	21699.1	30774.4	2.31942e+06	58090	13460.8	22840	133129	627675	491610	265838	162876	162028	162030	74073.2	167139	358145	3.52087e+06	35542.9	910826	455889	397191	31294.4	170100	79091.4	65942	2.86854e+06	14435.6	28088.6	39254.9	66198	40859.4	26016.8	15293.6	4.74668e+06	421383	705687	693714	309961	2.8394e+06	4751.82	889593	560171	237771
654	14059.4	53828.3	128217	116738	410373	167792	28534.2	31534	2.57079e+06	95644.7	20149.2	23695	190989	767401	436711	135146	163030	31130.3	98286.8	21065.7	212294	231604	2.33376e+06	23080.4	508585	270363	344852	36154.5	37993.3	34681.9	58940.7	1.89406e+06	50471.1	58701.1	36524.2	38882.4	42891.4	108869	17079.2	3.59128e+06	149592	992814	505407	158344	2.85836e+06	1000	457065	661830	217197
658	10835.3	39036.5	108635	125374	424777	177802	30386.6	25466.2	2.49137e+06	56530.3	15049.8	32468.8	177851	782574	387868	130478	183504	30362.8	105810	12418.5	239432	271980	4.13742e+06	10900.7	1.10045e+06	621335	619261	45048.6	147725	58358.3	80082.4	2.85077e+06	14527.8	81845.5	57799.4	71951.6	48867.6	36542.4	17907.4	4.08013e+06	1000	785673	662639	137216	3.06365e+06	1000	587645	626309	233883
604	16868.4	39796.7	114233	128889	490081	188237	27845.7	21354.8	2.79889e+06	98113.7	29263.6	30491.3	199305	945660	414347	128024	173567	40217.9	55022.7	19945.1	176694	134794	3.47782e+06	17034.6	815566	336205	420717	57788.2	61564.1	30890.7	92767.9	2.39472e+06	59899.2	103017	53032.7	42644.9	51010.6	37871	24923.4	3.22592e+06	334551	1.45979e+06	450129	1000	3.1357e+06	1000	239880	957693	225028
660	17886.5	64112.7	140158	113111	393347	171273	28203.2	8422.6	2.78464e+06	87906.4	17560.1	33520.2	171786	897675	537201	256500	236115	293567	133081	20924.8	230926	118893	3.4214e+06	19560.6	925742	419680	405413	48885.3	173676	34754.7	94436	2.73389e+06	41150.3	60109.1	68296.3	63584.8	36452.1	107583	25082.1	5.70668e+06	336758	1.26465e+06	646398	226188	2.37054e+06	1000	607033	605975	274162
674	7892.96	44744.5	130052	130508	398630	198457	30086.6	19537.7	2.45725e+06	94575.6	21419.5	31288.9	159463	775561	592764	187987	199784	207128	131952	18347.2	140904	392527	5.35173e+06	45255.3	1.21267e+06	505821	514594	25815.2	180305	38184.4	119626	3.87159e+06	42331.9	52671.6	37097.5	56865.1	49797.9	35488.6	20538.5	4.41819e+06	348672	1.16783e+06	670188	732460	3.12795e+06	3228.25	594140	826625	235318
680	8537.28	41622.6	100139	101072	281904	150982	25997.5	26621.2	2.3851e+06	86858.7	15672.6	18229.4	143006	695278	494900	219204	181567	25397.8	127558	16075.1	160130	363027	3.71946e+06	17665.1	931634	425497	435364	18097.4	176477	48174.6	83611.8	2.85403e+06	17086.2	51685.5	62367.7	51663.7	42273.9	107309	15353.2	5.94797e+06	221432	734604	115822	332746	2.80721e+06	1000	585633	652629	277996
682	27963.7	61196.4	124785	140643	492996	217951	30416.1	23663.7	2.23304e+06	90863.7	19605.5	23825	127474	649626	588371	170301	204409	182108	135370	15392.7	178068	262403	3.37975e+06	21565.1	636070	393149	590231	21262.2	96193.9	58790	74025.1	2.67205e+06	28162.1	95591.7	51044.2	83408	51594.4	30238.6	15198.7	4.46087e+06	165306	796906	115843	506857	3.20707e+06	6891.58	729801	868008	236504
678	13652.7	56415	177056	173761	611256	227027	31663	36752	3.04945e+06	69648.9	15916.4	29439.6	202454	1.00217e+06	414360	254102	286214	189635	125807	19552.2	265162	377274	3.25505e+06	8898.88	863668	369265	439415	27457.2	118240	35195.7	70141.9	2.52568e+06	34361.2	59863.6	48142.6	39257.7	38653.7	122303	32118.2	5.70004e+06	191673	1.46586e+06	673033	332700	2.63848e+06	10830.7	491861	678786	275834
617	15002.1	65342.3	175137	170737	560360	247583	39832.6	42941.8	3.04277e+06	130012	29183.6	37105.9	176641	901195	776161	235357	221666	523235	42278.9	25218.4	273281	121602	5.53551e+06	18097.4	1.61139e+06	699482	747212	62662.1	246409	61597.2	162305	4.49115e+06	24938.3	110691	84254.7	59308.3	54169.2	120835	41983.7	6.22704e+06	454830	1.20675e+06	593601	210068	3.09175e+06	25901.8	554180	1.13988e+06	264796
628	25247.2	34184.7	99318.2	88856.4	344148	163336	28441.6	31647.5	1.98878e+06	90692.5	20662.7	19721.4	136548	495697	563487	200948	126484	341624	74097.2	6018.55	123276	70546.7	1.68152e+06	22442.5	82453	1000	288137	17085.6	30953.1	38877.2	30807.8	1.15203e+06	40112	70093	51925.5	95693.5	40349.6	88120.2	13004	4.13842e+06	1000	824749	511380	223639	2.8196e+06	1000	193402	526943	513047
684	14668.9	36741.7	98847.2	108612	347474	189087	29249.1	36652.8	3.10481e+06	133702	24988.9	26661.2	217458	935119	573310	138134	241932	181983	94122.3	14055.1	226687	299396	5.91781e+06	5665.55	1.64591e+06	792989	417776	59170.8	159198	73293.4	152640	3.31518e+06	44106.9	44230.8	12291.5	45049.7	44539.8	140463	6719.68	3.83227e+06	222217	1.08709e+06	595216	213645	3.04978e+06	5854.9	692739	679167	165487
686	11214.5	48966.2	111174	100591	330339	150224	29618.6	19105.5	2.77988e+06	84355.8	20334.3	28014.6	187605	793805	409766	147374	243541	168802	87470.7	20809.9	229531	283262	3.91883e+06	20402.6	1.15636e+06	564948	504257	21144.7	165395	50439.7	70574.1	2.49865e+06	33539.9	59847	46663.4	50189.7	48343.8	30729.8	19859	4.86629e+06	212538	945041	535501	219833	3.19554e+06	11558.3	606599	673184	578468
631	22326.8	44081.2	139340	141001	563863	224613	32841.3	23663	2.70929e+06	97698.6	22359.4	27924.3	165877	728717	692172	157773	189627	170936	90719.9	20589.7	230527	252935	3.13538e+06	21716.7	430077	175913	487598	69118.6	71337.5	20484	78532.5	1.79334e+06	70199.2	91669.3	54192.4	46489.6	53689.4	36454.5	54022.2	4.76099e+06	240130	1.52694e+06	521960	159386	3.30649e+06	17629.2	663942	815446	188663
693	11516	35031.5	106799	117052	379240	166690	26376.6	19667.5	2.8528e+06	59382.7	19185	33007	171924	815221	718338	295524	202667	161128	236327	24439.3	232444	341395	4.03841e+06	51399.4	1.50536e+06	534287	531614	11961.7	124250	59598.6	89250.8	2.65644e+06	59489.2	20783.2	27535.2	35083.9	47238.3	37749.4	19739.8	5.38187e+06	187898	1.05629e+06	761530	664081	3.17417e+06	61626.4	815082	700475	203001
723	13760.5	52168.7	118679	99367.9	359947	155682	23813.4	18665.4	2.56018e+06	76474.2	18519.8	35135.1	164902	703534	613447	229935	228089	153729	112821	34792	211334	80326.1	2.33593e+06	17906.7	431577	311433	314994	26167.7	59668.3	16714.3	60224.3	1.68348e+06	42045	59999.8	37322.6	92251.7	36665.3	50024.8	23178.9	5.17531e+06	382548	928280	821138	437588	2.8765e+06	17800.9	764616	583130	178491
656	11018.9	41232.4	112448	134630	388507	173585	30437.1	14702.3	2.70379e+06	116088	31666.7	16434.5	187580	838612	796183	178857	179025	170470	130127	21163.5	168405	325920	2.38552e+06	31125.5	603207	293335	284717	38588.9	1000	27403	88379.8	1.6599e+06	58475.3	69454.6	38022.6	71083.3	49897.7	144942	23911.8	3.62289e+06	131087	1.15743e+06	418309	155689	3.12469e+06	1252.42	529375	1.00847e+06	734083
738	13286	64496.5	142287	134336	465004	190194	29369.2	48016.4	2.75158e+06	82616.4	22760.6	18972	175272	825677	644957	225721	249455	162495	135501	52904.8	225038	325736	4.93735e+06	66838.9	1.28398e+06	662327	798731	52793	189968	39817.4	118092	3.46616e+06	27002.8	110283	73687.7	46764.5	55501	48179.3	45755.6	5.68804e+06	395033	1.12639e+06	588241	402984	3.21733e+06	20036.8	612961	862685	208661
748a	16385.7	82498	243122	213497	734696	347127	53599.4	21096.8	3.82589e+06	131511	21666.7	35029.4	230719	1.15208e+06	1.03748e+06	283528	324089	576922	1538.9	54865.8	334706	380435	5.82722e+06	95936.5	1.4423e+06	773509	666848	61292.8	172225	94547.3	183468	3.98168e+06	1506.69	105264	33206.2	79018.9	49496.3	46668.6	59156.4	4.96033e+06	887377	1.11622e+06	689661	540784	3.12416e+06	46126.6	783315	841360	202089
823	1393.26	18715.2	20738.2	26354	126078	59237.4	11767.8	5033.27	1.2736e+06	32084.6	4420.44	17382.9	53066.5	33732.9	71066.6	1000	17218.6	102673	19019.3	1000	103704	186877	1.97372e+06	167390	236738	536824	546308	191824	756153	96357.9	35830	1.42219e+06	113858	54722.2	153818	174511	6488.15	54228.6	29418.9	2.9533e+06	1000	859116	237268	135679	778832	1000	438879	95884.4	275325
803	20955.8	62537.4	159222	151849	489243	186712	27340.1	12876	2.60483e+06	116764	29855.2	30883.7	160330	704388	638167	211165	335796	418880	100017	30690.9	267046	69324.3	4.55257e+06	90580.9	856564	595568	650720	37210.3	201970	69444.5	111736	3.65088e+06	1000	114149	83072.8	135397	47246.7	77560.4	40942.4	6.76061e+06	381932	1.33018e+06	774398	1.38251e+06	3.12505e+06	50397.3	786417	728090	236247
685	15686.9	52874.1	153640	147543	469561	223950	35977.2	18252.9	3.33691e+06	85423.9	21009.9	29997.5	212296	957038	671066	270735	252552	172674	123471	34254.1	217892	336698	2.64353e+06	21310.6	683323	345513	505942	41369.9	77912.3	42005.2	70355.6	1.86821e+06	86657.4	56375.9	57691.4	58607	48990.1	40709.3	21230	5.15322e+06	444618	958909	1.16673e+06	596142	3.1363e+06	24888.4	850232	727808	195782
816	19606.2	49312.3	148471	166628	613080	245412	38186.3	33694.3	2.61323e+06	75966.4	20649.5	30593.1	160823	657347	557480	167913	177229	156835	101964	21581.7	216713	68533.5	3.69785e+06	39149.4	816454	366653	741326	15716.9	115374	30175.4	73023.1	2.99255e+06	10180.1	128330	70841.5	67284.9	59694	31675.3	13750.9	5.59478e+06	152723	1.0735e+06	635897	249071	3.50558e+06	7873.03	768219	817817	210860
687	8220.38	32627.3	100459	95608.2	318891	148750	26151	10178.1	2.95741e+06	73603.7	15077.9	31945.2	210436	897058	427143	178511	198305	178394	99174.7	12431.2	204945	65231.3	3.44956e+06	16509.2	969621	459141	401753	41032.9	124332	51523.6	63177.3	2.54987e+06	53716.6	40267.2	39294	40519.7	38614.2	123973	10089.1	4.28982e+06	236034	958082	564289	202507	2.74593e+06	1000	525274	620240	547937
688	13226.9	42996	123844	110344	364385	166453	27203.9	26786.4	2.5277e+06	94496.9	20577.6	24582.9	168818	699636	568670	166001	195657	164761	96389.5	11285	212656	91186.8	3.57956e+06	8112.29	942055	479852	284316	47407.9	147428	24776.2	86381	3.00419e+06	48146.5	27964.6	40172.4	37234.8	40150.3	116135	26578.2	4.42182e+06	1000	1023320	519613	243963	2.75413e+06	1000	702271	679705	638757
599	7864.76	39022.7	119170	110618	361632	220922	37102.2	38650.1	2.89625e+06	94064.1	24173.2	30262.2	213549	733804	430428	121349	149142	93769.3	87408.4	9301.88	211711	323670	2.81532e+06	28899.8	430333	273830	292629	23676.9	107397	29311.3	78845.4	1.35676e+06	8389.44	26810.5	24952.4	43961.5	44498.1	136815	1000	4.4012e+06	57612.9	814231	478535	53380	3.4456e+06	7697.25	503698	624809	434712
610	26524.1	69873	201271	152564	610791	243722	38863.5	19143.6	3.26585e+06	69324.6	23302.9	25210.7	194621	950325	735419	231990	326697	90472	138035	46075.6	204285	353658	2.17308e+06	40156.2	375598	227633	287111	26507.8	83147.6	29183.4	52493	1.18107e+06	40486.5	21143.5	37570	35522.7	53480.2	120998	20399.3	5.99383e+06	386828	1.09258e+06	1.07731e+06	529731	3.70387e+06	37961.8	763827	623520	63146.7
542	8154.46	42322.5	110352	89123.7	344434	168721	26504.7	20478.8	2.16571e+06	134763	29697.3	25458.5	182367	591745	679214	125874	161402	349740	123866	30549.1	151432	289608	2.14376e+06	47511	263793	261349	451962	29433.7	14238.1	35715.4	31870.7	937199	1000	68803.5	20335	60622.5	50792.7	109408	1000	3.45441e+06	74358	666817	577165	284559	3.47507e+06	10744.7	684698	707530	393170
613	15698.6	37289.3	132975	117076	376698	137087	23910.4	32425.3	2.27895e+06	110716	22796.4	27981.1	177505	578791	553292	130759	234488	392846	24031.3	18497.4	276029	87854.8	4.43743e+06	7067.16	1.01467e+06	499098	426307	48506.5	252197	58603.9	106313	2.31608e+06	51177.1	60296.5	71329.2	78899.1	23066.2	114168	45825.9	5.91813e+06	196013	1.49815e+06	666287	330655	2.57251e+06	26127	652003	490560	450273
629	15445.8	48022.8	185303	186788	608133	271670	44396.3	36231.4	2.77624e+06	81710.6	29004.8	31049.7	175682	632293	675485	278824	209057	360549	126492	72804.2	294708	321519	4.32592e+06	20029.5	1.01469e+06	502861	799684	34151.7	191604	64108.9	118752	2.0005e+06	88154.3	155789	112557	120667	40676.9	109247	1000	5.45742e+06	673829	1.20691e+06	96286.7	492766	3.40279e+06	53788.4	744273	749102	79421.7
570	14829	38363	103596	111327	410474	153897	23712.5	77783	3.21965e+06	84543.1	16623.5	23424.2	221766	937488	423970	174521	252067	100320	21209	15746.9	276794	345437	2.9423e+06	19956.8	726562	492535	708871	49951.3	186549	59775.2	72173	1.60342e+06	81724.1	121037	108145	101991	38526.6	30160.4	45789.7	5.57343e+06	54477.7	1.34569e+06	595069	218067	2.80749e+06	15269.3	599461	481320	373187
652	11681.6	27698.6	70297.7	58441.5	235136	100329	17466.6	18766.5	2.06192e+06	68297.5	11945.7	23513.6	179231	485779	405804	112877	124030	86510.4	79358	14876.7	147704	245661	2.03405e+06	17737.1	224960	292081	453834	48492.7	102464	59215.3	66711.1	1.33332e+06	49393.7	78546.3	60612.4	84169.9	27484.3	110447	29748	3.66573e+06	77663	909760	592507	241471	2.39152e+06	10826.3	685795	337407	260436
673	2400.41	10179.2	15367	12766.4	76573.8	39172.7	14967.1	13098.6	1.02693e+06	6432.08	1000	14173.4	147780	1000	3632.01	428639	24714.4	36537.5	40342.5	1000	148997	341828	3.33854e+06	237989	931663	823470	1.08409e+06	297114	1.28809e+06	193853	88865.6	1.9906e+06	105149	73906.9	258642	304172	1000	69806.4	82877.1	3.4948e+06	174578	1.01658e+06	557458	126963	1000	1000	532962	1000	135067
671	30107.8	72063	164516	158212	639916	286702	40009.7	17413.2	2.82984e+06	113822	27989.4	28111.6	193287	759487	546097	135412	216039	88247.1	78198.6	10576.9	239817	335488	3.29263e+06	55767.1	591112	349878	430988	8805.33	114013	28284.9	92451.7	1.88756e+06	55136.4	81638.2	61562.8	57399.5	39721.5	108853	44796.1	5.06517e+06	109070	1.25426e+06	551966	231685	3.23688e+06	23669.8	545599	746036	80621.3
708	19831.8	47992.5	132503	119659	421158	169814	28933.8	39521.4	2.51742e+06	83994.9	23922.7	27524.1	184120	666157	674503	208898	231310	363009	116578	36725.9	201851	178664	2.14989e+06	37071.7	374717	224286	393801	28788.1	74594.2	29391.8	73394.5	1.32608e+06	15103.1	51700	33880.9	55067.7	38074.2	120365	1000	4.71896e+06	86268.3	798354	597439	295967	3.17868e+06	25736.1	765113	590495	419286
677	13262.2	37440.8	123962	205040	525256	144138	21107.4	19964.8	3.02863e+06	62331.2	23895.7	28021.3	201548	1.01866e+06	460187	234990	154445	103324	148247	29353.9	189866	106441	3.21904e+06	33062.2	1.06565e+06	413760	714944	35589.5	134390	10660.7	80894.2	2.02878e+06	65143	123435	42522.8	89144.4	52076.9	128185	1000	4.687e+06	72761.2	971125	496529	285720	3.72319e+06	21757.2	482059	924884	54782.7
683	15090.3	56321.4	161641	194070	662126	245893	37497.9	25921.5	2.7026e+06	138343	32724.9	27233	190694	635967	657656	144837	177243	459851	117671	46754.5	235880	91112.3	6.74906e+06	19642	1.82728e+06	1.01952e+06	489690	101152	300037	88591.4	178858	4.16157e+06	103925	62687.8	50223.9	98884.2	57183.2	114734	59304.8	5.14349e+06	138949	1.37068e+06	574202	202479	3.52807e+06	16431.2	604986	889472	507370
709	13931.4	66867.1	187881	166246	522647	275646	44742.7	22967.7	3.30557e+06	73843.3	15433.9	26889	207453	863957	688534	264509	277701	93262.6	29213	38777.3	290296	376428	2.13334e+06	44790.8	715483	326762	490654	31086	82489.4	42660.8	18803.1	1.45532e+06	46335.1	76019.5	59991.6	24445.5	41070.9	36011.5	1000	4.72327e+06	442886	848062	850350	934135	3.17398e+06	57614.8	867868	621583	400665
687a	22707	52259.3	116504	114220	399688	219811	26661.2	19212.7	2.8139e+06	174469	36351.5	17010.7	183516	909787	1.24126e+06	193769	239555	656669	154360	64570.7	237252	340608	5.46576e+06	61092.2	1.22049e+06	639743	457127	86129	168031	87500.1	172141	3.63932e+06	79602.3	78377.4	39795.1	121856	42032.6	118001	105092	5.41301e+06	685186	1.64927e+06	667805	533578	3.06895e+06	29644.9	858607	1.03305e+06	90939.6
710	14312	58699	124663	115923	426896	202501	30715.3	20940.7	3.10775e+06	65026	16269	29086.1	200545	961442	641861	150247	260234	89278.7	110506	20221.8	214681	344982	5.78971e+06	41700.2	1.03051e+06	597049	538868	23459.2	243195	68675.4	117645	3.92039e+06	52181.8	59786	55725.2	84567	51494	41705.5	20013.4	5.17561e+06	484948	979202	615756	454072	3.30548e+06	15624.1	708081	617051	385066
711	16539.7	34678	112653	122397	449722	188259	27116	38791.3	2.25456e+06	127755	27926.5	27202.7	185584	505439	444289	93309.1	133222	356605	39190.1	2070.1	144298	73211.3	4.13922e+06	5444.19	557235	555365	503387	55523	184405	39236.6	106776	2.86297e+06	91746.3	83584.3	40803.7	61319.9	51242.6	33290.3	19663.5	4.24561e+06	46740.3	732850	486700	127786	3.10528e+06	4433.1	499299	724617	407230
692	18595.9	51621	146381	126682	471660	233856	38288.5	18544.7	2.99581e+06	73123.6	14575.2	19328.4	185871	822534	816172	254625	1433.39	297308	175335	15734	236732	380428	3.56183e+06	65309.1	980403	395255	340187	25305.2	177072	65224.3	79572.8	2.366e+06	31052.4	35933	31742	79165.7	29339.7	42502.5	10921.2	6.55971e+06	438610	1.5792e+06	101976	489745	2.54108e+06	21264.4	871306	507809	488557
689	23238.4	45404.7	139699	123067	424051	197395	33147.2	18471.8	2.85899e+06	93948.8	23812.8	32915.6	178342	770994	860176	274921	322691	537167	174749	67623.7	306489	345747	5.61824e+06	96345.9	1.74343e+06	712697	577315	84050.2	319377	87673.2	133554	3.71034e+06	22999	75321.2	84085	111926	40627.3	110910	50502.8	7.26774e+06	789538	1.37096e+06	764368	618564	2.93878e+06	49132.9	709675	679463	106300
695	12555.3	41124.3	109423	115984	363707	185537	29657.9	19597	2.76508e+06	90911.8	23394.6	26196	191330	654560	637018	138951	185472	91489.5	112914	30767.1	151094	303395	5.39403e+06	12311.5	1.71798e+06	693888	445792	47781.3	148247	67438.4	155580	3.64684e+06	69989	55039.3	42369.2	77237.1	46283.1	29085.6	20360.6	3.33355e+06	148816	989097	606784	218810	3.2431e+06	4017.88	703775	729953	301679
614	8504.28	43603.9	139359	128765	410045	225853	39254	24042.2	2.29245e+06	79423.4	26470.4	27561.5	181664	515828	628001	129216	155162	329681	114822	22464.5	168600	235575	4.8551e+06	51310.5	889543	342576	451766	24744.8	137206	12757.8	120468	3.21003e+06	48454.5	55003.3	36582	37979	56637.4	35843.8	1000	3.87564e+06	57202.1	653772	489739	206054	3.5136e+06	4285.21	586829	784197	378060
712	9107.65	37213.4	94708.4	97370.4	378416	183458	32365.9	35705.6	3.27438e+06	97926.8	18682.4	27056.6	232105	964368	140987	69544.9	189554	109148	29613.5	9824.56	162896	94665.6	1.92313e+06	17503.8	282312	305133	334306	4978.8	22421.1	8132.95	57354	1.49809e+06	23806.8	68606.1	20535.3	34305.1	48143.7	138441	91169.1	3.26486e+06	267944	1.00709e+06	529859	92857.7	2.77901e+06	3687.71	66852.7	622153	316515
728	16620.8	50827.8	157979	122288	406753	191521	34334.9	19873.3	2.09402e+06	144497	35671.9	31616.5	165685	476993	812865	120081	228226	536030	42121.3	19171.1	226856	81773.4	4.52176e+06	64332.8	826837	482688	458678	62894.1	154752	48940.2	147844	3.27378e+06	9202.55	73546.6	63536.7	77656.2	50066.8	26466.1	115001	5.04588e+06	68960.6	1.24879e+06	659275	291965	3.0133e+06	12446.2	674451	842180	497698
732a	14197.1	60909.8	127924	143901	482024	178783	25178.7	13991.9	2.4835e+06	67865.7	25585.7	26033.8	187661	709734	436851	255289	221679	86685.1	156975	39587.9	191866	104316	4.32545e+06	14307	1.20146e+06	667524	960608	30346.7	110218	31414.7	94742.5	3.22116e+06	5399.55	134362	62448.9	46534.4	58319.7	34393.5	1000	3.69848e+06	107631	741961	571287	251596	3.74757e+06	10256.4	590287	851808	68208.7
713	19832.8	94720.8	349471	279289	891247	432668	71603.4	26056.2	3.47002e+06	102535	22588.2	39152.7	205595	890526	788208	220483	282023	457802	42276.6	17839.2	344287	419806	5.01675e+06	61936.2	1.04891e+06	306733	583955	91222.6	254227	54059.5	8016.51	3.65871e+06	9732.97	92808.3	86221.2	63023.8	49323.4	32387.3	139176	6.56998e+06	579412	1.73623e+06	703448	289066	2.97476e+06	19889.9	618369	865942	127191
735	16806.5	29993.1	85267.5	129601	411189	115865	20849.9	41876.4	2.37871e+06	134375	28038.2	22569.5	182218	594385	382543	142244	196207	337056	92992.9	47536.7	197160	84159.8	3.55073e+06	15835.8	934668	741126	1.09555e+06	137135	189045	38165.6	114825	2.70208e+06	24369	197121	109474	44237.2	48311.9	113563	135308	4.93313e+06	71506.3	1.66548e+06	663648	303614	3.04778e+06	17797.9	410176	876240	417703
736	12010.9	28897.8	67804.1	83175.8	268136	132211	23321.4	38546.6	2.43818e+06	84653.8	17384.9	17649.4	194766	680109	601980	212009	182345	89729	155620	54424.2	198718	93622.4	3.57538e+06	26519	979887	562173	783218	47871.8	174054	81016.2	88248.2	2.83684e+06	100087	116541	78478.2	125959	56056.8	32974.6	31494.9	4.48987e+06	374943	1.0174e+06	646875	430513	3.19324e+06	4462.42	665891	766973	373686
719	12565.9	52998.7	153082	166634	510944	277882	45944.4	19818	3.41462e+06	79043.4	20836.2	45731.6	199036	875425	786035	192474	236053	292706	43709.4	26494.6	283106	475645	2.94427e+06	40903.9	561606	395739	655683	37700.5	176145	80695.8	84175.1	2.51206e+06	65648.9	122301	99261.1	150031	59459.7	60370.5	1000	5.48454e+06	535057	1.07894e+06	679433	417220	3.39309e+06	21948.2	760992	874550	95608.6
756a	11405.2	25244.6	94400.3	105885	299362	158857	30341.3	23626.5	2.21909e+06	89691.7	18046.5	14903.7	190346	533114	441868	155346	134817	86138.7	114776	6615.89	144474	100357	2.4757e+06	28897.1	524003	136855	328437	43041.2	41125.3	35882.1	35684.9	2.1287e+06	51483.4	51470.9	35177.1	42776.3	56773.3	110400	64703.3	4.34144e+06	57612	1.08309e+06	510365	203108	2.95638e+06	3952.7	581301	628159	352476
737	29465.7	61884.8	170236	170736	588121	220365	32082.8	28954	3.63698e+06	126337	24647.4	30118.2	210263	989404	629821	139849	314791	402395	79312.7	15220.7	263606	387889	5.08008e+06	31023.4	1.89854e+06	729147	326430	115632	279389	55452.5	135126	3.95358e+06	66997.3	24876.8	65129.3	60872.2	40747.9	32549.1	173471	6.15273e+06	436843	2.1023e+06	954844	248353	2.53385e+06	16401.2	592070	811115	607451
757a	6063.54	26413.8	67133.1	57320.1	197142	120382	21860.2	18870.6	2.19071e+06	138474	29724.9	21056.1	184862	483251	404495	78938.8	165822	85316.5	74835.6	26748.2	147301	89646.8	2.258e+06	34936.5	420666	244241	309327	31622	32586.3	23120.9	92356	1.89228e+06	40463.9	61702.9	31065.3	29334	49958.2	34263	22154.5	2.07902e+06	64813.1	837405	458840	123225	2.64134e+06	3266.91	453053	759411	226253
720	20436.1	59603.8	157736	148939	428334	240023	38767.2	25939.6	2.45094e+06	151133	27492.9	32154.1	170209	673929	1.24889e+06	263135	255072	632435	132996	23274.2	242877	378242	1.89841e+06	41803.3	449584	165222	222669	23504.5	98012.3	28967	77482.3	1.66469e+06	5954.05	29642.8	26782.9	72144.5	42423.8	103698	110862	6.75798e+06	358237	1.50717e+06	709243	532719	2.58741e+06	32050.8	777994	798497	779632
758a	9517.19	37054.6	98249	109530	307848	172103	32434.9	26211.4	2.69189e+06	55901.7	13690.5	30183.2	193912	669784	430566	252234	263443	91397.5	164000	31364.5	217927	113961	2.81363e+06	35001.9	793873	286878	507581	45909.2	93114.4	39415.9	70330.9	2.29377e+06	51618.5	66226.2	55208.5	54274	45788.4	46642.1	66564.8	4.63209e+06	247172	1.07753e+06	623718	578473	2.72061e+06	9392.47	749325	541231	277802
761a	13383.5	60614.6	164488	158917	503397	200385	33781.8	19163.1	2.53101e+06	63573.3	17417.7	26468.9	185733	657168	787455	267034	157926	85967.7	201578	21191.6	160511	80192.7	6.61996e+06	31180.5	1.96172e+06	757484	676004	54008.4	261339	103346	150537	5.14923e+06	2911.58	43297.8	62637.8	94846.7	55214	104028	30765	4.76606e+06	87011.7	805949	718004	809779	3.13578e+06	12462.4	745734	819692	452328
760a	21534.9	48717.2	112262	94809.1	383896	178014	28736.5	25971.8	3.19063e+06	117197	21390.7	36886.1	205685	889151	845706	201932	281699	89765.5	135221	27871.8	273606	295086	7.27215e+06	29541.8	1.28289e+06	822685	510799	94949.5	346728	103056	187262	5.7088e+06	27299.3	43220.3	46494.7	89296.7	55561	20238.6	130443	5.79365e+06	333839	971835	620945	397096	2.94701e+06	14341	740064	686125	458553
721	24846.4	53737.2	133982	135238	468748	201798	28495.7	31129.3	3.11677e+06	81965.5	17772.1	30251.4	82735	963510	1.08728e+06	263970	293695	406042	142941	28682.9	240400	80375.6	2.33041e+06	37467.2	459161	288389	421572	37112.2	74502.2	70510.4	66456	1.96986e+06	29218.8	62423.6	63184.5	132366	44112.2	36679.8	45266.6	5.24701e+06	709539	1.3282e+06	1.28208e+06	1.38945e+06	2.74718e+06	52086.5	1.08466e+06	662060	99109.1
762a	18803.9	40624.2	113860	98932.1	331184	123592	20762.8	17928.6	2208214	89133	24252.3	25869.4	165694	545148	667418	200951	255967	341378	19063.5	30364.7	191708	90792.8	4.02482e+06	11496.1	1.0077e+06	541502	600933	60611.3	150015	64931	114646	3.47358e+06	76059.8	103467	82417.5	104448	53807.2	104484	68145.6	4.3967e+06	87397.4	1.12652e+06	685141	384716	3.05967e+06	12560.7	684107	863891	400570
730	12853.4	59476.3	164540	153745	534784	225826	32116.7	23148.4	3.22601e+06	104889	26261.5	31881.6	196054	856912	848693	246209	248944	517197	141682	33341.5	257317	332392	2.49151e+06	43791.6	718723	308990	340086	44625.2	145712	29199.9	38041.6	2.23863e+06	45044.7	30176.7	40731.3	28591.8	47004.8	25028.4	46897.2	7.17845e+06	346414	1.25682e+06	764268	454150	2.80982e+06	20547	590340	955526	757410
731	12455.7	60201.4	130422	85848.4	287076	120022	19655.8	12626	3.08312e+06	66221.9	10109.5	16430.2	81170.5	849823	720108	313100	367441	86492.2	160931	99877.4	327753	78377.9	2.98465e+06	42246	754083	305697	279911	47684.3	129837	71073.5	63532.9	2.83127e+06	1588.75	35214.5	38569.9	52110.9	39507.8	119839	140403	5.57293e+06	615612	1.51884e+06	995325	1.66338e+06	2.29675e+06	40190.7	1.00348e+06	539936	434601
764a	8797.7	45512.2	118458	140281	426555	168328	27956	29763	2.66887e+06	120707	27922	27023	184666	721158	731325	232719	293634	476269	186181	34686.8	224018	221434	4.11104e+06	34396.3	1.03803e+06	583172	678622	57566.3	189270	45156.2	10337.9	3.61921e+06	16945.3	108221	73583.6	56255.2	50778	113503	81689.4	5.81706e+06	93013.2	1.14478e+06	589320	359480	2.91614e+06	14880.1	567868	883607	519524
766a	8296.19	47811.4	97474.7	87818.8	309341	166285	30255	19475.4	2.43197e+06	82540.3	14443	27141.1	199348	589446	388492	173102	231307	89344.4	120640	28055.6	144669	92835.3	4.84677e+06	94585.2	1.38364e+06	1.06932e+06	884832	33442.6	211658	36604.7	123311	4.22212e+06	46978.2	110314	74042.4	72399.9	54092.1	30780.6	108510	3.92726e+06	65341.8	819429	598374	211619	2.47391e+06	4248.64	563444	725756	350946
770	29772.4	55010.6	143774	147288	419481	183336	28793.9	24794.5	2.79897e+06	97881.9	18660.7	26396.7	153082	773500	759475	195132	369541	136989	98812.1	36235.8	261522	304690	5.74911e+06	28420	1.17492e+06	355786	468800	51190.4	234057	99309	109239	2.04795e+06	37024.9	31189.8	69724.8	105940	38825.8	37943.8	40293	6.15178e+06	103396	1.24712e+06	833440	1.00015e+06	3.1358e+06	83549.8	869606	502078	335810
768	27616.2	48616.3	150529	171137	514837	278811	36998.6	47066.4	3.91381e+06	95609.5	23477.7	11227.3	244194	1.19177e+06	933323	356587	302118	362990	169860	79431.9	246347	375172	8.84115e+06	38578.4	2.51381e+06	981737	627768	64302.6	250981	133619	165410	4.27388e+06	48882.8	46571.1	45509.9	16869.3	42781	120475	1000	4.74388e+06	176901	1.26141e+06	667536	897190	3.53263e+06	124712	897321	728982	363440
732	19043.3	76948.2	175718	168862	578164	277296	42271.1	19692.2	3.40506e+06	75613.7	24067.8	32535.2	202354	970736	697003	235908	318275	144935	138173	25215	255361	358608	3.15782e+06	48620	798245	478722	654908	29004.3	147487	33397	86722.2	820912	42885.4	96927.4	44107.1	133923	41618	5865.03	1000	4.95571e+06	262018	1.10668e+06	554719	451084	3.53659e+06	36111	772999	590865	336808
744	20997.8	45734.9	148267	123105	451451	201813	38814.7	35382.9	2.22078e+06	85752.9	23738.9	24702.4	126610	607404	708748	192907	181730	381521	121263	30800.7	203695	70522.9	2.84841e+06	25919.9	715926	336568	504610	54139.1	55585.6	54663.9	75217.9	1.4645e+06	41188.1	83481.4	52141.9	85890	42238.9	1000	11553.9	4.93428e+06	588901	1.11408e+06	554437	339470	3.24385e+06	24112.5	731664	680835	423900
772	17744.8	65482.4	161636	177087	601008	247701	35213.4	39368.4	3.31442e+06	92738.4	27002.9	31600.6	223921	902592	803154	297352	294603	145146	151941	39993.2	256959	68551.8	4.78149e+06	66266.7	1.3826e+06	723095	808277	55351.5	175933	86594.9	125753	2.21276e+06	97218.1	122797	66117.9	104320	43068.5	15831.2	35882.6	4.59883e+06	1.16932e+06	1.29894e+06	714513	572625	3.28876e+06	65106.7	815693	668673	285150
777	2631.7	18920.3	1000	3458.48	27119.5	3822.56	8718.77	7038.85	1.08416e+06	17059.3	1000	22885	57937.7	50038.2	1000	303335	1000	124398	6684.49	1000	59260.6	314040	2.8566e+06	33782.3	631807	645285	808454	93013.6	660396	81770.7	52190.7	1.03979e+06	79226.3	68740.3	163557	159114	9355.03	47862.7	128388	3.41426e+06	449493	960621	204271	91947.3	516042	1514.64	409944	1000	53813.6
773	15012.3	40008.2	129005	133559	443000	207264	35342.9	16655.1	2.78764e+06	113142	24353.2	31442.6	142511	794117	989101	182841	209538	700722	106494	31655.7	274248	77243.6	8.90854e+06	111322	2.39729e+06	1.02551e+06	824969	115065	467131	109199	243478	4.88306e+06	30351	92978.9	127127	131136	36126.1	38271.4	50526.1	8.26353e+06	141107	1.80602e+06	725777	364156	2.95755e+06	28454.6	733470	659581	764703
776	8290.69	41854.1	130560	103727	377784	247329	42689.6	12617.2	2866058	92412.1	16691	30002.8	209712	825193	739990	167158	180993	145800	142685	17807.2	178250	353118	3.68043e+06	20158.7	792472	474957	389061	51608.1	109757	64283.5	100642	1.74995e+06	28827.9	48993.3	55757.2	91754.1	39340.2	104103	1000	4.69429e+06	146828	833820	948776	394083	2.89495e+06	14203.3	739345	539409	428420
780	10089.4	54585.6	142221	138275	332195	233013	33173.9	16592.3	3.31176e+06	95145.8	20598	27644.7	246046	1.02517e+06	657975	147930	251242	160867	97545	4026	206407	336693	2.39759e+06	40019.5	697338	334068	247610	49588	104684	34680.1	51327.5	1.16257e+06	19584.8	42095.7	40731	58201.4	39003.7	123868	23381.5	3.55702e+06	788671	1.15768e+06	861704	429005	2.71657e+06	14466.7	679834	572801	295523
746	12595.8	56990.2	170369	202521	691576	285865	41217.5	31128.6	3.75029e+06	91361.4	25054.1	25439.8	254540	1.04082e+06	396391	139498	186874	165326	95349.3	24466.8	248450	331485	4.95709e+06	26541.1	1.30966e+06	758710	755053	23341.6	133582	35635.9	136823	3.00586e+06	11888.7	167871	54634.6	77328	54608.1	130336	1000	3.07667e+06	184003	774349	373569	51416.3	3.82213e+06	10375.5	420160	825189	251002
781	10099.1	41693.9	105313	123861	395471	177200	28596.5	36971.3	2.31563e+06	66905.7	19173.5	25193.9	127313	633064	493799	113318	155190	130934	82383.1	1000	164851	307624	3.73277e+06	40983.2	1.16072e+06	309225	455192	42931.3	189796	52743.5	82515	2.18896e+06	59453.5	60302.2	32224.2	58134.2	40806.5	81794.9	7027.85	5.70721e+06	118163	1.00742e+06	367520	188760	3.15224e+06	8387.3	532990	659337	452640
784	10157.2	29864.2	118035	127364	451700	220455	45427.5	31073.1	1.99825e+06	75286.4	21610.9	21952.4	111336	422348	687939	133444	117633	429519	102831	1120.48	170689	311757	2.98955e+06	23542.2	520577	334561	335190	47135.9	146222	18455.3	95862.6	1.81164e+06	46056.7	69303.9	71328.6	84019.4	49425.7	78955.9	1000	5.53623e+06	494618	798120	532750	172557	2.98641e+06	7820.79	678008	591624	457876
747	15467.6	66736	164259	138547	447821	207945	35834.3	21409.3	2.57435e+06	90549.3	19627.8	17802.7	162729	672471	638283	185457	218232	134145	91552.6	9749.14	226454	69842.2	2.33684e+06	42923.4	448690	204417	350141	42270.6	120269	28202.8	34782.5	1.10617e+06	24136.3	34296.3	15540.6	74044.3	38960.7	93544	1000	4.42157e+06	115124	880760	574796	492423	3.03166e+06	20633.4	717890	614461	324549
783	15646.8	33714.2	91727.7	89145.6	266325	123942	22379.4	39187.3	2.83095e+06	89114.1	19346	25659.8	182753	689233	651687	196957	240422	143843	141691	26067.2	201211	291038	4.11891e+06	50001.1	1.23398e+06	396027	382784	37648	169114	62172.7	121279	2.49154e+06	51961.4	32448.7	43917.6	37043.5	37679.9	104578	11010.8	4.27701e+06	121932	902143	709710	487109	2.7195e+06	22093.1	730794	537971	277279
785	4778.1	26452.2	12091.8	37753.2	173001	82518.7	27573.6	3292.04	1.60455e+06	23445.2	1000	33634.5	117803	148468	1000	149946	62404	110381	45898.7	1000	179737	215481	3.52657e+06	321037	864630	1.15013e+06	1.15695e+06	374679	1.37586e+06	179230	102748	2.17626e+06	146979	105421	299188	251308	1964.14	57956.9	94344.8	5.41907e+06	120309	1.40931e+06	655445	50880	543801	8443.53	427775	55915.5	229682
789	10540.9	26423.1	97387.1	117511	352010	169933	33548.2	32196.5	2.23611e+06	72474.3	24337.1	25963.1	153432	518072	318551	97889.6	164008	133879	83145.6	19364.8	207848	70885	4.04464e+06	46047.3	1.21279e+06	324437	775911	43922.4	111707	23549.1	116837	2.69088e+06	15763.8	147531	65444.7	83913	43087.3	76346.8	85216.7	3.84063e+06	138567	1.33164e+06	402045	245459	3.03481e+06	7428.67	461254	663672	228958
748	22644	47449	131556	121612	452861	224303	27341.2	29223.2	2.64535e+06	72974.2	20079.2	29764	168067	726548	722197	298084	201120	137953	168172	99074.5	240922	66773.3	2.69087e+06	26355.5	620668	372446	486362	49545.6	110763	48941.2	75878.9	1.70897e+06	30899.9	80319.6	36109.5	120549	46367.5	87154	1000	3.58158e+06	137662	952774	918791	1.28823e+06	3.09545e+06	57922.7	914096	646055	264095
787	16578.8	61743.7	154524	181937	694929	292762	47806.1	34938.2	3.17476e+06	107119	32733.1	28820.9	175757	896904	1.19287e+06	241936	261156	464109	136463	29413.5	306218	387162	8.57239e+06	25611.4	2.33285e+06	1.03548e+06	744565	88039.3	326054	125595	198260	5.86287e+06	14107	78322.6	85334.9	128898	42859.2	9585.13	63987.2	5.50766e+06	286200	1.39731e+06	728919	300859	3.19598e+06	39712.9	759011	840874	1000
754	16526.3	44105.5	96787.6	95825.3	396343	184103	30007.6	22779.3	3.0361e+06	92001.9	21341.2	25743.1	179462	826408	702736	229699	205699	145372	122640	36179.9	246761	351521	1.74236e+06	44624.2	370325	150108	358910	43891.5	112756	24996	61920.2	835651	26515.3	61603	45684.7	71849.5	45359.2	96460.5	12668.5	5.46621e+06	107467	989966	625948	385655	3.16403e+06	17812.5	830909	644505	374642
792	15629.9	37202.9	96004.7	111607	320608	122000	2695.3	39223.9	2.28421e+06	100985	26240.8	32740.4	165495	612108	690968	151712	163337	435204	96579.1	19320.9	169903	63638.5	4.27954e+06	55874.5	1.2164e+06	510809	429466	54638.4	159480	22183.5	131319	2.94382e+06	31336.9	47947	50427.6	58411.8	45278.5	81086.4	73248.3	4.47299e+06	158285	1.29364e+06	515836	220266	2.96506e+06	7552.29	674554	705791	407368
765	13788.4	33336.1	109602	110080	402700	163194	26753.2	19408	3.14837e+06	103329	23626.6	27303.2	210385	966355	859148	239084	203381	147355	134430	25950.8	292908	88630.7	3.87773e+06	53248.6	1.14378e+06	487133	613091	56754.3	172736	81444.9	22788.8	2.92158e+06	14400	108967	50287.3	25517.4	40522.5	116582	27488.3	4.63237e+06	172823	1.289e+06	633788	963170	2.81645e+06	38789.9	832158	691296	300749
795	32444.7	96977.9	288784	245998	876683	334251	48933.9	32668.6	2.57601e+06	105845	28526.5	16427.7	163119	631903	645381	212499	239444	430185	1000	9170.3	253678	336595	3.95159e+06	32699.8	574632	511946	407113	64802.9	140277	21200.4	122932	3.09139e+06	83247.4	27153.2	50583.5	57076.7	40760.4	93180.3	116026	4.46082e+06	316102	1.81521e+06	446889	195996	2.84363e+06	13746.6	545923	844874	431642
794	14221.1	42954.2	109805	110632	394562	180013	24229.7	24097.3	3.18795e+06	98842.2	18381.9	26553.8	205458	872749	993572	388472	229913	144845	167869	55388.7	209103	444376	3.76794e+06	52728.1	937184	480421	384036	49458	147543	77816.7	105933	2.89e+06	57525.5	20151	52448.5	102049	43414.9	113793	1000	5.11309e+06	816287	985391	773365	837096	2.99158e+06	27721.7	982030	677264	422876
756	13756.9	56478	150748	146326	487472	174078	27184.3	42968.3	2.50961e+06	78733.9	22005	32961.5	177477	660985	477093	260193	260859	134162	162045	31468.3	202251	74982.3	2.46384e+06	44752.6	561153	227517	561778	25897.5	124834	43171.2	79332.9	1.83897e+06	43599	107314	42751.9	75868	49067.1	86695	69897.1	4.83306e+06	477743	1.27453e+06	452931	222342	3.20528e+06	9043.38	565433	708455	358374
799	15832.2	32242.4	90294.2	104291	359138	96940.7	19500.6	34095.7	2.33068e+06	106973	27636.3	22204	142971	665304	412495	150730	190366	481372	95033.8	10940.1	185901	308490	4.35048e+06	38070.3	1.51848e+06	579866	480605	79204	220766	47400.7	128207	3.21008e+06	52543.1	37697.4	49207	18137.2	41272.4	79496.7	48555.5	5.41133e+06	122873	1.5779e+06	651312	181839	2.86719e+06	7744.7	425221	835469	526748
798	27208.3	56973.8	143938	131477	578097	178769	29335.3	36989.3	2.90024e+06	91409.5	28576.2	9760.36	160157	721840	722242	206609	217238	131172	109748	33993.8	257595	342380	3.72592e+06	42395	1.07122e+06	374994	465398	52280.8	139975	58762.2	111818	2.94977e+06	36301.6	38946.1	42903.7	91270.1	47509.6	97790.1	30856.8	5.15665e+06	137806	1.45514e+06	708858	396693	3.17951e+06	25130.2	791721	779730	301078
757	10508.5	43088.3	93630	72496.9	262700	76302.7	18766	18267.3	2.01261e+06	70134.9	13112.9	27155.4	155693	508264	262394	122229	188508	129443	85155.8	1000	166316	231692	2.04757e+06	40266.9	356113	345860	635687	47607.5	75271.1	41448.2	65307.1	1.57615e+06	76117.6	115960	38936	25358.8	50783	77508.6	114486	3.79405e+06	471189	921871	424357	210511	2.66479e+06	6156.68	478749	581676	236272
804	11053.5	50394.3	112213	129961	380207	156977	26300.1	41338.5	2.73987e+06	75470.9	17336.2	27727.1	181564	775393	623727	177513	237521	130782	128832	37605.8	217512	318468	6.49869e+06	39477.6	1.86631e+06	830866	931263	93329.6	291626	135967	24792.3	4.96346e+06	54436.9	71636.8	86032.6	152706	46177.6	100037	49144.5	5.67558e+06	107602	1.28012e+06	616662	430150	3.06864e+06	11073.9	793038	707676	382649
758	12855.7	65318.7	189428	162414	501079	254240	46288.5	23378	3.33575e+06	114497	36754.7	35637.4	193193	882169	1.10579e+06	195855	315357	494448	1000	51963.7	281664	345300	5.31359e+06	21962	1.48409e+06	670363	614051	34204.3	199365	37166.6	141021	3.93033e+06	25004.2	40934.4	35436.3	33558.3	55248.4	1000	15925.3	5.03918e+06	186328	1.05288e+06	628582	565754	3.23742e+06	31390.7	632570	1.055e+06	1000
805	24241.8	56602.7	179041	159025	614799	287592	38156.6	30445	3.23436e+06	83174	17744.6	27786.5	199799	955759	842924	308172	245417	142583	162114	48538.2	314729	283769	4.37387e+06	79276.3	983878	829238	695107	55778.6	180665	110318	118139	3.64694e+06	18223.5	73326.9	85623.6	170865	45387	107010	19044.1	5.12587e+06	156193	969481	769528	1.18977e+06	3.17987e+06	54661.1	921979	762625	320588
760	22994.5	49308.7	147048	148092	562432	264940	42386.7	16325.2	3.56824e+06	132254	33193.1	28163.2	260543	1.02391e+06	462471	185257	222493	160722	121190	27359.1	213289	87897.9	2.64402e+06	38509.2	804311	167856	329319	42630.6	89736	29529.4	85263.3	2.03223e+06	18029.5	69450.3	32018.8	41642.9	57999.4	125287	50504.5	4.14748e+06	860215	1.22212e+06	498595	203969	3.46937e+06	10068.6	531659	998149	388916
808	19271	49993.5	171999	141398	608252	290654	43880.3	34865.1	2.15114e+06	145940	37505.7	13906.1	91959.7	469244	979546	107606	161890	672542	81596.7	11036.2	210341	70392.1	4.05333e+06	50855.5	656067	295670	376640	26970.1	183214	39594	135170	3.44485e+06	41764.2	72992.2	75272.1	79336.9	58957.3	80562.8	162847	8.34819e+06	146461	1.45913e+06	774860	273493	3.18799e+06	10317.2	582722	935480	59437.2
762	15681.6	59403.4	138698	109984	440741	175842	28492.7	34453.7	2.85985e+06	105113	23010.3	27638.8	182017	758693	382446	115595	208182	147096	77804.3	41300.7	232703	63806	3.33906e+06	36850.7	422177	348212	397405	20005.4	159432	30578.4	109370	2.61292e+06	10898.4	89710	74281.5	31289.5	56087.4	102278	60719.5	5.51279e+06	148003	1.01016e+06	535974	166765	3.16905e+06	7847.25	389150	696621	482767
810	10492.5	50091.8	129715	111169	453572	169205	28157.9	36309.3	2.78413e+06	96441.3	24090.9	29527.7	196137	699698	454367	122854	180865	146283	1000	35314	151692	61454.8	2.90511e+06	39498.3	566742	230390	359439	42567.8	64111.8	28871.2	47990.1	2.73768e+06	45139.6	31631.6	44877.1	29242.9	64655.1	108073	41530.2	2.96859e+06	433986	740514	438332	218620	3.39459e+06	5555.89	523775	876404	277243
809	17746	41344.8	145225	147203	501123	211350	29514.7	19532.1	3.67008e+06	113570	23784.7	33576.9	203847	1.13119e+06	814029	218982	280502	149713	123325	36934.5	282913	59999.4	4.25555e+06	73779.9	1.00182e+06	629130	534605	65738.9	181778	73247.7	21174.4	3.89238e+06	30617.8	90569.3	47017.9	105566	45675.7	115680	103384	5.71295e+06	163705	1.47913e+06	1.25271e+06	380420	2.99349e+06	23532.1	828221	842378	417727
818	8082.62	32462.8	64911	54213.5	245530	110098	20034.8	10250.9	2.07981e+06	86363.1	17904.3	26784.9	150838	511737	418843	129518	172347	131905	108297	34585.7	173554	243686	3.51489e+06	40953.6	365198	468058	293881	33243.7	155132	27635.8	98710.7	3.27591e+06	18483.2	42365	46305.4	66124.8	61992.6	83743.9	177331	3.77422e+06	108910	897503	774220	236574	2.76621e+06	7069.28	597679	693719	294046
763	18684.3	74377	148785	118866	417954	193109	25538.9	31657.5	2.68235e+06	96152.1	23706.7	28950.6	172764	776596	780327	218712	335037	387347	125892	46637.4	267702	324315	3.34474e+06	36319	793225	457756	482164	72749.5	120065	54758.8	108510	2.67256e+06	20932.3	88450.6	68025.1	106686	46249.7	106208	193298	4.68586e+06	387750	2.10127e+06	766670	541799	2.79837e+06	14833.8	781421	776134	407469
764	13311.6	36992.9	87654.4	62409.5	212014	100535	18593.3	12346.6	2.23131e+06	94972.9	11571.5	34247.1	164984	643029	773434	295443	253995	337193	183248	15460.7	521801	243782	1.79536e+06	39882.2	358955	241743	353805	42943.2	81972.6	59230.3	72701.1	1.60081e+06	50151	55356.6	34371.4	68058.8	37359	87663	4261.18	4.88114e+06	111776	771580	828343	1.38974e+06	2.33598e+06	26215.5	1.02149e+06	553986	339123
766	10116.1	66035.2	163440	151782	477148	196289	30126.2	40447.5	2.66516e+06	94815.2	22402	30937.2	181425	668406	493770	150632	220901	139071	73585.6	41463.9	185913	74127.8	2.74988e+06	33682.8	384817	148573	382854	44577.3	100872	35915.9	100500	2.65267e+06	26247.7	96190.1	57946.9	29351.6	56950.1	100212	39030.9	3.98895e+06	130100	647866	576459	307328	3.24237e+06	9866	557452	910870	368542
819	20643.9	73597.3	244902	200489	601471	240867	33748.7	14710.9	3.33386e+06	147981	31623.3	18985	203609	982670	870205	246787	497441	554625	174417	48865.2	289361	90168.2	3.78981e+06	45700.6	1.03352e+06	807939	765835	71490.1	200840	17587	130314	3.43822e+06	14414.7	137428	92826.5	104236	48413.4	112206	89717.1	6.78626e+06	320904	1.58683e+06	741027	426199	2.99337e+06	18312.1	538142	1.14413e+06	26878.2
767	14460.2	36853.6	162383	131148	441627	205419	37158.8	15546.8	2.81418e+06	74197.8	17309.9	38812.6	199882	655276	570141	152793	191602	143062	95225.3	34116.2	203959	360303	2.7187e+06	49649.7	543930	293138	227826	38850.1	154681	42585.4	74336.3	2.58521e+06	30124.1	58850.2	37976.7	22278.8	57267.4	1000	76287.1	6.11859e+06	130859	1.09062e+06	506706	244963	2.93013e+06	7574.31	571359	703031	506138
821	10748	47264	139691	139434	384459	184838	31691.7	11319.4	2.8082e+06	99330.6	26786.3	28241.3	173296	678336	503407	157676	264932	138795	85551.3	55257	255587	280165	3.02613e+06	41984.3	733248	509838	935751	51859.8	157129	40544.2	29951.8	2.93898e+06	67555.2	173679	78740.5	37365.6	66379.5	36002.7	95332.5	5.74255e+06	117363	743404	437735	222521	3.32113e+06	9570.27	521928	971196	418875
822	7906.57	18746.4	56334	71565.5	170764	151548	26742.2	20103.2	2.36603e+06	237452	30979.6	29677.1	157437	608744	1.05644e+06	94523.4	116662	772895	69508.5	13513.6	145777	250876	3.95276e+06	47760.5	794909	433476	236618	50392.6	153467	49024.5	223876	3.88504e+06	132323	43004.2	63489.3	28389.7	35355.6	70223.5	1000	4.80921e+06	515132	1.26052e+06	1.25133e+06	172970	2.11271e+06	5856.14	649022	821063	761456
355	11450.6	31617.3	92879.1	110672	418050	190974	28700.6	1000	2.70083e+06	94791.5	27096.7	28402.9	192825	641713	294804	82947.9	135711	145877	69939.1	19179.7	125603	313555	3.4936e+06	28536.4	775528	458164	446105	39434.1	115849	25536.7	100423	2.96751e+06	19801.2	72903.5	36891.6	33857.5	68357	109116	16449.8	4.01372e+06	279259	439119	339423	97167.8	3.22479e+06	3661.64	333014	878296	381449
[truncated: 137 more columns]

## Sheet: cord plasma, positive mode
samples	CE(16:0)+NH4	CE(16:1)+NH4	CE(18:0)+NH4	CE(18:1)+NH4	CE(18:2)+NH4	CE(20:3)+NH4	CE(20:4)+NH4	CE(22:6)+NH4	Cholesterol+NH4	HexCer-NS(d18:1/24:0)+H	LPC(16:0)+H	LPC(16:1)+H	LPC(16:1)+Na	LPC(18:0)+H	LPC(18:0)+Na	LPC(18:1)+H	LPC(18:2)+H	LPC(18:3)+H	LPC(20:3)+H	LPC(20:4)+H	LPC(20:4)+H	LPC(20:4)+Na	LPC(20:5)+H	LPC(22:6)+H	LPE(22:6)+H	MGDG(20:4_20:4)+Na	PC(12:0_20:0)+Na	PC(14:0_16:0)+H	PC(14:0_18:2)+H	PC(16:0_16:0)+H	PC(16:0_16:1)+H	PC(16:0_18:1)+H	PC(16:0_18:2)+H	PC(16:0_18:4)+H	PC(16:0_20:1)+H	PC(16:0_20:2)+H	PC(16:0_20:3)+H	PC(16:0_20:4)+H	PC(16:0_20:5)+H	PC(16:0_22:6)+H	PC(16:1_18:2)+H	PC(16:1_22:6)+H	PC(18:0_18:0)+H	PC(18:0_18:1)+H	PC(18:0_18:2)+H	PC(18:0_20:2)+H	PC(18:0_20:3)+H	PC(18:0_20:4)+H	PC(18:0_22:4)+H
2	2.61483e+06	2.63496e+06	4.44051e+06	2.11111e+07	2.36694e+07	4.7898e+06	1.48892e+07	2.22627e+06	439646	75323.6	758098	2.5894e+06	681226	7.41491e+06	1.64094e+06	8.47828e+06	1.17688e+07	7.57665e+06	2.74679e+06	1.92885e+06	1.02811e+07	2.43134e+06	2.69434e+06	1.40186e+06	433525	1.35424e+06	1.26762e+06	1.17421e+06	496924	7.3839e+06	7.7746e+06	6.79637e+06	6.99093e+07	1.14257e+06	167097	3.78608e+06	4.44321e+07	9.02134e+07	1.76994e+06	3.65499e+07	2.17891e+06	1.38077e+07	1.35425e+06	1.55194e+07	4.75741e+07	1.71812e+06	287638	7.00779e+07	1.65198e+06
550	2.89175e+06	2.8232e+06	4.70801e+06	2.06405e+07	2.5104e+07	4.82973e+06	1.54751e+07	2.22634e+06	502573	94434.4	935944	2.86719e+06	715881	9.45516e+06	1.88783e+06	8.54699e+06	1.31397e+07	8.70589e+06	2.4692e+06	1.92518e+06	1.15228e+07	2.71809e+06	2.91986e+06	1.51811e+06	373814	1.42454e+06	1.36768e+06	1.27724e+06	551947	8.00844e+06	9.67104e+06	1.06011e+07	7.17643e+07	1.36774e+06	218296	1.84998e+07	3.78492e+07	109898566	7.26154e+06	4.61938e+07	2.43504e+06	1.51544e+07	1.47564e+06	1.73404e+07	4.91576e+07	1.47355e+06	195704	8.95354e+07	3.60834e+06
548	2.60554e+06	3.05645e+06	3.46218e+06	2.00353e+07	2.23651e+07	5.15579e+06	1.41079e+07	2.56139e+06	425457	90504.1	486765	2.49854e+06	637324	5.7422e+06	1.26216e+06	7.0237e+06	9.44587e+06	5.91481e+06	2.36434e+06	1.6924e+06	6.93728e+06	1.72297e+06	2.1502e+06	1.16862e+06	252038	1.23757e+06	1.05763e+06	1.09203e+06	465501	5.63857e+06	8.38475e+06	5.84472e+06	6.09781e+07	1.24509e+06	79699.2	4.12561e+06	5.47553e+07	7.85116e+07	2.34877e+06	3.78117e+07	2.098e+06	1.29364e+07	1.45642e+06	1.0113e+07	4.23581e+07	1.96236e+06	392516	6.06914e+07	1.86781e+06
549	3.04578e+06	2.0973e+06	1.78532e+06	1.70768e+07	1.94305e+07	4.08089e+06	1.26431e+07	1.41654e+06	357354	19699.8	561646	1.86993e+06	502177	7.01933e+06	1.53857e+06	5.10912e+06	6.95398e+06	6.37607e+06	1.55637e+06	1.13635e+06	7.64995e+06	1.88489e+06	1.57548e+06	814255	252496	987937	1.33501e+06	1.04393e+06	386582	7.91684e+06	6.86024e+06	5.07516e+06	5.45201e+07	1.01901e+06	191526	3.43744e+06	3.81484e+07	8.62763e+07	5.05505e+06	2.88889e+07	1.68891e+06	1.37285e+07	1.5187e+06	1.20429e+07	3.90049e+07	1.73311e+06	391608	8.06378e+07	2.60952e+06
551	3.23174e+06	2.04602e+06	3.43495e+06	1.91612e+07	2.34737e+07	2.4922e+06	1.8893e+07	2.04929e+06	394982	89556.3	700287	2.11119e+06	551964	7.54492e+06	1.67139e+06	8.0937e+06	1.34335e+07	7.48854e+06	2.80108e+06	1.82934e+06	1.36515e+07	3.22539e+06	3.06555e+06	1.43605e+06	403181	1.34475e+06	1.41784e+06	844883	450843	7.31434e+06	6.43187e+06	7.54614e+06	7.02528e+07	935920	69576	1.26376e+07	3.4857e+07	1.19741e+08	1.80308e+06	3.5919e+07	2.12422e+06	1.65803e+07	1.97602e+06	1.10496e+07	4.31964e+07	1.02542e+06	208948	9.08065e+07	2.33746e+06
556	18707.5	3.54388e+06	3.53998e+06	2.14473e+07	2.35389e+07	5.68009e+06	1.9186e+07	3.01966e+06	589211	84688.7	855719	2.80893e+06	733878	7.39499e+06	1.62314e+06	8.58489e+06	9.7312e+06	8.09966e+06	2.0078e+06	1.92718e+06	8.72443e+06	2.14694e+06	2.1956e+06	1.30483e+06	289039	1.32812e+06	1.58249e+06	1.46886e+06	681583	9.71652e+06	1.3924e+07	1.21286e+07	7.07337e+07	1.91481e+06	315951	1.56509e+07	3.82981e+07	1.12086e+08	6.87197e+06	5.01596e+07	2.60888e+06	1.57089e+07	2.06815e+06	1.94925e+07	4.19855e+07	1.12098e+06	183946	8.12244e+07	3.18695e+06
555	3.51413e+06	1.98342e+06	3.10623e+06	1.77492e+07	2.21695e+07	2.43618e+06	1.81118e+07	2.95842e+06	386746	88904.4	406717	1.58888e+06	441197	6.35616e+06	1.4672e+06	5.04324e+06	6.75097e+06	4.78056e+06	1.48863e+06	1.01662e+06	7.87727e+06	1.96556e+06	1.52366e+06	1.21608e+06	251298	1.15868e+06	1.11135e+06	1.04204e+06	428026	6.77001e+06	5.35288e+06	5.51611e+06	5.90544e+07	819207	140197	3.14359e+06	2.79749e+07	9.06508e+07	5.89909e+06	4.45715e+07	1.64412e+06	1.43623e+07	2.2573e+06	9.88169e+06	4.08678e+07	1.50826e+06	251588	8.08333e+07	1.72467e+06
43	1.06226e+06	562684	927816	2.52799e+07	5.22326e+07	1.95437e+06	1.30337e+07	2.10274e+06	914868	176204	380863	751797	211829	1.00946e+07	2.73435e+06	4.36285e+06	8.30068e+06	5.41185e+06	471804	774563	2.51324e+06	658818	1.9223e+06	646922	150356	2.30788e+06	544549	623152	2.18913e+06	5.60529e+06	1.78619e+06	3.51501e+07	2.13016e+08	182817	229812	9.83784e+07	1.07696e+07	9.04321e+07	1.93939e+07	4.80866e+07	4.68321e+06	1.08273e+07	601049	9.69293e+06	1.18643e+08	353240	1000	6.61669e+07	4.6358e+06
331	2.83181e+06	2.12545e+06	3.64158e+06	1.91612e+07	2.00174e+07	4.48253e+06	1.46939e+07	2.03243e+06	419603	134213	56621.5	2.28894e+06	593932	6.60245e+06	1.51037e+06	7.2928e+06	8.81571e+06	6.34011e+06	2.05947e+06	1.60208e+06	9.94725e+06	2.4778e+06	2.02052e+06	1.21199e+06	304663	1.15178e+06	1.44813e+06	1.32426e+06	425050	8.86592e+06	7.03658e+06	6.16943e+06	6.04971e+07	1.03555e+06	207068	3.32307e+06	3.79988e+07	1.0104e+08	1.54324e+06	3.98847e+07	1.87321e+06	1.52336e+07	1.37116e+06	1.68437e+07	4.18923e+07	1.37409e+06	331987	8.59177e+07	2.17993e+06
564	3.00736e+06	2.15687e+06	1.62969e+06	1.80182e+07	2.41258e+07	4.56277e+06	1.59634e+07	1.96132e+06	394452	108939	679230	2.22254e+06	583892	7.22369e+06	1.69439e+06	5.92967e+06	9.3404e+06	6.64663e+06	1.63243e+06	1.41695e+06	7.89295e+06	1.93748e+06	2.11335e+06	1.02167e+06	238783	1.33732e+06	1.1723e+06	1.13446e+06	501634	6.64256e+06	6.96861e+06	6.4111e+06	6.99093e+07	1.02527e+06	120857	1.21993e+07	3.96446e+07	9.68845e+07	1.7409e+06	3.46572e+07	2.11963e+06	1.44415e+07	2.18154e+06	9.78582e+06	4.85987e+07	1.4246e+06	288214	7.92689e+07	2.03164e+06
332	892718	803192	714357	2.58851e+07	4.81242e+07	1.3155e+06	7.54885e+06	2.07151e+06	777919	162451	1.12935e+06	845176	234920	9.90472e+06	2.56975e+06	4.99364e+06	6.99057e+06	7.30659e+06	426646	953824	2.32444e+06	606411	1.59393e+06	757351	151540	2.44503e+06	700311	559100	1.73207e+06	5.44548e+06	3.69005e+06	4.03327e+07	2.19199e+08	400628	169595	6.22193e+07	1.57067e+07	6.80129e+07	1.95609e+07	5.37648e+07	5.39752e+06	8.62316e+06	1.27794e+06	6.13373e+06	9.03271e+07	353240	1000	4.01584e+07	1.24446e+06
562	3.42808e+06	2.09156e+06	4.83782e+06	1.93629e+07	2.52997e+07	2.79404e+06	2.09437e+07	2.98666e+06	542565	130101	953348	2.44491e+06	626080	8.88717e+06	2.01345e+06	9.61632e+06	1.35314e+07	8.6924e+06	3.14139e+06	2.37968e+06	1.4361e+07	3.36225e+06	3.03186e+06	2.15802e+06	478200	1.4154e+06	1.80926e+06	1.60154e+06	498610	1.03918e+07	7.01524e+06	8.90997e+06	7.14895e+07	1.01014e+06	115689	1.38977e+07	3.38097e+07	1.2849e+08	7.26154e+06	4.67346e+07	2.00344e+06	1.72933e+07	1.25212e+06	1.25395e+07	4.42209e+07	1.14315e+06	183959	9.25665e+07	1.94827e+06
566	3.47318e+06	2.18664e+06	2.15108e+06	1.74803e+07	2.17782e+07	2.15936e+06	1.56704e+07	1.65897e+06	371116	43393.4	246921	1.34597e+06	386367	3.88745e+06	906631	4.07643e+06	4.77184e+06	3.90987e+06	789989	894263	5.19661e+06	1.33208e+06	1.11863e+06	629141	142345	1.31193e+06	1.43197e+06	1.16408e+06	411593	7.81584e+06	6.56606e+06	5.91844e+06	6.33826e+07	992738	126242	9.29565e+06	3.24632e+07	9.57908e+07	1.85111e+06	2.88889e+07	1.80741e+06	1.45999e+07	2.05102e+06	9.65343e+06	4.12403e+07	1.31552e+06	248617	7.58467e+07	1.83902e+06
567	2.81844e+06	1.74645e+06	1.44558e+06	1.71441e+07	2.06044e+07	4.27163e+06	1.40103e+07	1.8745e+06	332420	62047.1	657160	1.8208e+06	492314	6.06962e+06	1.36825e+06	5.68919e+06	6.87467e+06	6.25952e+06	1.49253e+06	1.15368e+06	7.90676e+06	1.94546e+06	1.58335e+06	1.0507e+06	312198	1.11604e+06	678969	579337	353877	3.17289e+06	4.8277e+06	4.89545e+06	5.69933e+07	735275	77416.6	3.35045e+06	3.53058e+07	7.73086e+07	6.10735e+06	3.30348e+07	1.66417e+06	1.29364e+07	1.68318e+06	8.10304e+06	3.47203e+07	1.23548e+06	375755	6.57758e+07	1.34996e+06
569	118860	4.49774e+06	3.97936e+06	2.35317e+07	2.55605e+07	2.17592e+06	1.52798e+07	1.50624e+06	530558	5739.97	1.41533e+06	3.75418e+06	957721	1.16871e+07	2.64185e+06	1.25003e+07	1.4021e+07	1.04392e+07	3.07998e+06	2.89995e+06	1.14341e+07	2.71683e+06	2.95969e+06	1.42279e+06	301732	1.43334e+06	1.87525e+06	1.39605e+06	632778	1.19093e+07	1.00608e+07	1.0492e+07	7.26574e+07	1.432e+06	199328	1.86093e+07	3.97942e+07	1.07711e+08	1.80526e+06	3.14125e+07	2.67915e+06	1.50752e+07	1.24785e+06	1.7837e+07	5.12999e+07	1.4182e+06	196407	8.86554e+07	2.98315e+06
333	2.27098e+06	2.18423e+06	2.63591e+06	1.97664e+07	1.98218e+07	3.47071e+06	1.1276e+07	1.24491e+06	361397	20747.7	766054	2.17656e+06	570549	6.61851e+06	1.45439e+06	7.80787e+06	9.18279e+06	7.02705e+06	1.65898e+06	1.70048e+06	9.03039e+06	2.19894e+06	2.07496e+06	929267	255510	1.19171e+06	1.07193e+06	786528	399531	5.78182e+06	6.85208e+06	5.71529e+06	6.09781e+07	1.03497e+06	197239	3.44629e+06	3.54554e+07	9.4916e+07	1.55804e+06	2.63652e+07	1.97629e+06	1.45207e+07	1.91071e+06	1.20429e+07	4.04021e+07	1.06914e+06	255117	7.16424e+07	853993
343	643461	693621	743902	2.54816e+07	4.50592e+07	1.93497e+06	4.14241e+06	1.11847e+06	999383	204186	546995	729164	213363	5.69468e+06	1.28991e+06	3.8708e+06	5.81294e+06	4.94594e+06	430181	753791	1.94814e+06	515491	1.41426e+06	592404	116814	2.40717e+06	1.13414e+06	1.45129e+06	3.58369e+06	6.46655e+06	7.1175e+06	5.08615e+07	2.15077e+08	796084	287778	7.09852e+07	1.66044e+07	5.58737e+07	1.05451e+07	4.06058e+07	7.45909e+06	7.73254e+06	347665	1.17118e+07	9.64746e+07	353240	1000	3.32163e+07	1.34184e+06
573	2.93431e+06	2.48985e+06	5.34002e+06	2.01698e+07	2.68648e+07	3.2608e+06	2.54358e+07	3.93973e+06	537529	148432	857448	2.38028e+06	631332	7.88342e+06	1.72703e+06	8.57207e+06	1.22584e+07	7.52721e+06	2.75788e+06	2.06437e+06	1.24984e+07	3.00329e+06	2.81631e+06	1.67897e+06	415958	1.5476e+06	1.80296e+06	1.35365e+06	440871	10380639	7.0977e+06	8.80086e+06	7.84284e+07	1.03307e+06	173218	1.48839e+07	3.71012e+07	1.25209e+08	2.50352e+06	3.98847e+07	1.95068e+06	1.71348e+07	1.11365e+06	7.24703e+06	5.03684e+07	948685	199561	9.50109e+07	2.15937e+06
574	2.38811e+06	1.44553e+06	3.49533e+06	2.14473e+07	3.44295e+07	3.12813e+06	8.93905e+06	2.30677e+06	479996	102174	792242	2.11199e+06	560223	7.31363e+06	1.59017e+06	6.83893e+06	1.00815e+07	6.99699e+06	2.11355e+06	1.48189e+06	7.8217e+06	1.91336e+06	2.31955e+06	1.53833e+06	329440	2.27245e+06	1.31209e+06	1.30201e+06	1.08653e+06	7.18555e+06	7.44939e+06	1.12558e+07	1.16833e+08	1.01718e+06	64475.8	1.92668e+07	3.69516e+07	7.78555e+07	5.80569e+06	5.50266e+07	3.07721e+06	1.21442e+07	497449	1.10496e+07	6.44331e+07	1.10119e+06	97594.8	5.45315e+07	962309
575	3.80007e+06	1.9689e+06	1.84397e+06	1.69424e+07	2.11261e+07	4.8464e+06	1.92836e+07	2.2238e+06	386123	70219.2	509627	1.63085e+06	457359	6.22362e+06	1.35128e+06	4.83118e+06	5.92836e+06	5.50808e+06	1.35051e+06	1.16334e+06	8.59394e+06	2.15218e+06	1.39939e+06	1.04545e+06	235444	992190	1.26383e+06	1.05508e+06	412677	6.20262e+06	5.64473e+06	4.96267e+06	5.40392e+07	852244	109898	7.59727e+06	2.69276e+07	9.74313e+07	1.47095e+06	3.9344e+07	1.65715e+06	1.51544e+07	2.00186e+06	9.13641e+06	3.49997e+07	1.27339e+06	223774	8.81665e+07	3.77006e+06
576	2.40256e+06	1.52223e+06	1.48712e+06	8.28761e+06	1.99522e+07	3.38847e+06	8.75425e+06	1.78594e+06	317010	45803.7	979917	2.10894e+06	551759	8.28406e+06	1.81252e+06	6.64927e+06	8.55769e+06	7.29335e+06	1.75683e+06	1.24231e+06	6.2697e+06	1.60822e+06	1.98053e+06	1.26423e+06	320330	1.2183e+06	782167	687035	350058	4.23292e+06	5.84483e+06	5.30046e+06	6.15277e+07	847520	151421	9.5148e+06	3.9495e+07	6.36384e+07	1.39604e+06	4.23182e+07	1.64196e+06	1.15897e+07	1.96373e+06	1.46916e+07	4.6177e+07	1.73806e+06	386871	5.77581e+07	1.25415e+06
578	2.83474e+06	2.32066e+06	3.33403e+06	2.01698e+07	2.7843e+07	2.83413e+06	2.15297e+07	5.48368e+06	491893	110559	748516	2.35368e+06	584564	8.11719e+06	1.90564e+06	8.04444e+06	1.19646e+07	6.92543e+06	3.15078e+06	1.76239e+06	1.02811e+07	2.50819e+06	2.73544e+06	2.53722e+06	471062	1.30396e+06	1.59243e+06	1.29683e+06	448755	9.00919e+06	6.78311e+06	7.76435e+06	6.93597e+07	1.00724e+06	65078.1	1.42812e+07	3.24632e+07	8.54014e+07	2.80273e+06	5.90824e+07	1.94985e+06	1.3174e+07	1.18214e+06	1.17118e+07	4.69221e+07	1.27073e+06	266605	7.61401e+07	2.30525e+06
348	3.19449e+06	1.79623e+06	2.03589e+06	1.7413e+07	2.24303e+07	3.92055e+06	1.3229e+07	1.87763e+06	359654	74965.5	666623	1.55656e+06	431399	6.67055e+06	1.48434e+06	4.84517e+06	6.81046e+06	6.12616e+06	1.28381e+06	1.13501e+06	6.93867e+06	1.77049e+06	1.69629e+06	984426	258736	1.17594e+06	1.27636e+06	1.01241e+06	389206	6.86844e+06	5.14137e+06	5.26228e+06	5.98101e+07	779805	116570	8.36428e+06	2.97702e+07	8.03708e+07	1.49081e+06	3.75413e+07	1.79785e+06	1.34909e+07	2.19247e+06	1.00332e+07	4.05883e+07	1.42315e+06	296168	7.42823e+07	1.71363e+06
349	2.57035e+06	2.97668e+06	3.31651e+06	2.03715e+07	2.13869e+07	2.52054e+06	1.92836e+07	2.2383e+06	410299	8917.76	668694	2.30379e+06	550423	6.23924e+06	1.50048e+06	7.35527e+06	7.98596e+06	6.5407e+06	1.62071e+06	1.62128e+06	1.05472e+07	2.60885e+06	1.83873e+06	1.26529e+06	321217	1.13891e+06	1.61028e+06	1.4159e+06	510191	9.86292e+06	9.12311e+06	6.56279e+06	6.09094e+07	1.36362e+06	137128	3.2217e+06	3.15655e+07	1.18648e+08	1.8747e+06	3.5198e+07	2.06412e+06	1.65803e+07	1.23656e+06	1.48572e+07	3.649e+07	829577	197493	8.49399e+07	2.11057e+06
581	3.43537e+06	2.03993e+06	3.41598e+06	1.82871e+07	2.44519e+07	5.21983e+06	17818801	2.93657e+06	433066	130514	866178	2.33455e+06	617891	7.73407e+06	1.62837e+06	7.96423e+06	1.12792e+07	7.76352e+06	2.78997e+06	1.84321e+06	8.56305e+06	2.0863e+06	2.61835e+06	1.45876e+06	368397	1.42815e+06	1.52337e+06	1.12949e+06	423224	7.92662e+06	5.84517e+06	6.17989e+06	6.80544e+07	878841	155002	3.83403e+06	4.32352e+07	8.71512e+07	1.68917e+06	4.18676e+07	1.8263e+06	1.39662e+07	2.49569e+06	1.30362e+07	4.57112e+07	1.70629e+06	351472	7.43801e+07	2.38738e+06
579	2.92735e+06	3.1946e+06	3.45272e+06	2.01026e+07	2.64083e+07	4.74488e+06	1.3815e+07	2.72137e+06	490225	116477	966490	3.2582e+06	823844	7.68038e+06	1.76225e+06	9.88104e+06	1.31397e+07	8.66584e+06	2.96463e+06	2.26096e+06	9.57738e+06	2.29989e+06	2.99196e+06	1.61983e+06	351440	1.66011e+06	1.59287e+06	1.23903e+06	581777	9.45985e+06	1.04847e+07	8.74631e+06	8.43367e+07	1.49718e+06	184527	1.63083e+07	4.77236e+07	8.03708e+07	2.10873e+06	4.54728e+07	2.46599e+06	1.28571e+07	1.30691e+06	1.68437e+07	5.36285e+07	1.80659e+06	277611	6.09848e+07	1.9176e+06
355	2.45431e+06	2.171e+06	3.90703e+06	2.03043e+07	2.6017e+07	2.67273e+06	2.01625e+07	1.8002e+06	427452	107611	835441	2.22324e+06	588183	8.46401e+06	1.89326e+06	8.22509e+06	1.11813e+07	8.16327e+06	1.9249e+06	1.97593e+06	1.01278e+07	2.54115e+06	2.61847e+06	976278	236173	1.47995e+06	1.37288e+06	928300	400519	7.56051e+06	6.5486e+06	7.09528e+06	7.3894e+07	956989	166935	1.27472e+07	3.53058e+07	1.05305e+08	8.20764e+06	2.52837e+07	1.95593e+06	1.55505e+07	1.32029e+06	1.03999e+07	4.99959e+07	1.2852e+06	242440	8.85577e+07	3.27576e+06
583	3.02884e+06	2.67182e+06	3.4003e+06	1.99009e+07	2.15825e+07	5.29089e+06	1.82094e+07	1.87321e+06	477350	75482	801111	2.77659e+06	716296	6.7083e+06	1.55816e+06	8.12879e+06	1.03979e+07	6.93191e+06	2.44642e+06	1.91779e+06	1.09906e+07	2.69413e+06	2.47858e+06	1.27454e+06	311927	1.17219e+06	1.48136e+06	1.24212e+06	467701	7.39859e+06	7.66813e+06	5.76491e+06	6.10468e+07	1.13592e+06	162784	3.7287e+06	4.30856e+07	1.00384e+08	1.4463e+06	3.09618e+07	2.05534e+06	1.54713e+07	1.33285e+06	1.17118e+07	3.94706e+07	1.2348e+06	285037	8.35711e+07	2.68054e+06
585	2.94676e+06	1.97436e+06	2.30159e+06	1.84888e+07	2.49736e+07	2.80723e+06	2.16273e+07	3.34334e+06	457981	134192	747851	2.08673e+06	542177	7.26299e+06	1.60478e+06	5.81183e+06	7.25555e+06	6.70794e+06	1.39955e+06	1.31329e+06	7.52668e+06	1.94715e+06	1.6912e+06	1.299e+06	240060	1.27911e+06	1.75429e+06	1.33272e+06	445913	9.39444e+06	6.53145e+06	6.25723e+06	6.34513e+07	951618	137146	1.0501e+07	2.91718e+07	1.0104e+08	1.80596e+06	5.20523e+07	1.89086e+06	1.54713e+07	2.33067e+06	9.60481e+06	4.16129e+07	1.70051e+06	208602	9.35442e+07	4.6912e+06
350	3.28004e+06	2.17291e+06	1.5812e+06	1.76147e+07	2.13869e+07	4.84665e+06	1.54751e+07	1.85901e+06	358841	78272.9	879347	2.33288e+06	626628	7.05533e+06	1.6015e+06	7.43333e+06	1.0202e+07	7.87589e+06	3.08668e+06	1.71956e+06	8.9757e+06	2.23164e+06	2.43061e+06	1.25897e+06	321529	1.26901e+06	1.08422e+06	913207	423377	5.75596e+06	7.37869e+06	5.37106e+06	6.27643e+07	1.09312e+06	103376	3.96725e+06	4.72747e+07	9.0104e+07	1.48721e+06	3.24941e+07	1.99912e+06	1.45999e+07	2.16497e+06	1.18773e+07	3.95638e+07	1.49967e+06	414598	6.97846e+07	1.64554e+06
586	2.97095e+06	2.01261e+06	1.30724e+06	8.65904e+06	2.41911e+07	4.37968e+06	1.30337e+07	2.09514e+06	397311	81894.7	903781	2.76308e+06	729167	6.49766e+06	1.51693e+06	9.20794e+06	1.60773e+07	7.5306e+06	3.75711e+06	2.16283e+06	1.05472e+07	2.52623e+06	3.77462e+06	1.50155e+06	246817	1.52302e+06	1.24264e+06	842884	354948	6.3915e+06	6.33697e+06	5.64279e+06	7.05963e+07	950896	41362.1	8.3095e+06	4.78732e+07	5.19366e+07	7.98503e+06	2.85283e+07	1.73904e+06	1.1352e+07	1.3788e+06	8.18264e+06	4.76673e+07	1.64035e+06	382340	4.85672e+07	1.01601e+06
477	2.41969e+06	2.17455e+06	2.66892e+06	1.96319e+07	2.32129e+07	5.35205e+06	1.49868e+07	3.0609e+06	455304	105191	1.21443e+06	2.68518e+06	719528	9.03797e+06	2.1938e+06	8.71213e+06	1.12792e+07	9.68698e+06	2.98078e+06	2.26545e+06	1.02811e+07	2.56577e+06	2.62045e+06	1.85837e+06	421011	1.30751e+06	1.34962e+06	1.33115e+06	458039	8.16649e+06	8.12502e+06	6.471e+06	6.75735e+07	1.17806e+06	144112	4.35334e+06	5.38576e+07	9.03227e+07	2.5179e+06	5.91726e+07	1.87953e+06	1.39662e+07	2.17787e+06	1.65127e+07	4.30101e+07	2.41964e+06	353543	6.4798e+07	3.04466e+06
587	2.53669e+06	2.98106e+06	2.24485e+06	1.99681e+07	2.04739e+07	5.21346e+06	1.62563e+07	2.9446e+06	520360	122675	1.19318e+06	2.91824e+06	757559	1.00385e+07	2.19497e+06	8.37853e+06	8.92062e+06	7.6651e+06	2.51455e+06	1.64238e+06	1.00689e+07	2.44743e+06	2.02955e+06	1.65303e+06	308042	962182	1.33451e+06	1.18281e+06	435165	7.284e+06	8.29717e+06	5.10575e+06	5.27338e+07	1.22523e+06	247619	3.6383e+06	4.2188e+07	8.75887e+07	1.76288e+06	5.1872e+07	1.72108e+06	1.39662e+07	2.06411e+06	1.94925e+07	3.5838e+07	1.94339e+06	317386	7.41845e+07	4.18621e+06
590	3.22611e+06	3.0252e+06	3.1346e+06	1.86233e+07	1.91697e+07	4.9045e+06	1.62563e+07	3.62564e+06	430756	64644	1.11727e+06	3.04891e+06	800479	8.82268e+06	1.9478e+06	8.49052e+06	8.74259e+06	8.7977e+06	2.17452e+06	1.98872e+06	9.80389e+06	2.41991e+06	1.98153e+06	2.04497e+06	390519	875223	1.45723e+06	1.11247e+06	400861	8.18408e+06	8.69546e+06	4.68738e+06	4.86117e+07	1.28975e+06	215272	3.31624e+06	3.85973e+07	8.99947e+07	2.87537e+06	5.99838e+07	1.61643e+06	1.44415e+07	2.04764e+06	1.86648e+07	3.15534e+07	1.56675e+06	335502	7.14468e+07	1.934e+06
486	2.46421e+06	2.44332e+06	4.47148e+06	2.03043e+07	2.25607e+07	5.56453e+06	1.9186e+07	2.79568e+06	542511	107823	876866	2.24443e+06	598006	6.96837e+06	1.62129e+06	8.25948e+06	8.93798e+06	7.26119e+06	2.54775e+06	1.85026e+06	9.72938e+06	2.41581e+06	2.10683e+06	1.47604e+06	331334	1.26657e+06	1.55375e+06	1.23893e+06	422487	9.05757e+06	7.81444e+06	6.12043e+06	6.37261e+07	1.11253e+06	193906	3.89436e+06	5.07158e+07	1.03884e+08	2.09964e+06	4.50221e+07	1.94568e+06	1.57089e+07	1.4547e+06	1.27051e+07	4.30101e+07	1.65651e+06	324505	8.30822e+07	3.01329e+06
588	2.51504e+06	1.55014e+06	3.20609e+06	2.07077e+07	2.75821e+07	2.87504e+06	2.19203e+07	3.09989e+06	500560	5739.97	1.31856e+06	2.16453e+06	545193	1.19799e+07	2.53815e+06	8.02319e+06	1.25522e+07	1.03386e+07	2.14009e+06	1.94151e+06	1.13454e+07	2.77499e+06	2.89567e+06	1.65016e+06	391781	1.46515e+06	1.82235e+06	972973	442669	1.06085e+07	4.7104e+06	8.30988e+06	7.60238e+07	790382	223315	1.34594e+07	2.99198e+07	1.10992e+08	1.50717e+06	4.94385e+07	1.95593e+06	1.54713e+07	1.40419e+06	1.06746e+07	4.73878e+07	869031	193934	9.67709e+07	2.94189e+06
593	2.63216e+06	1.70998e+06	3.07955e+06	2.0237e+07	2.67996e+07	3.18839e+06	2.56312e+07	4.46199e+06	547386	98771	1.35512e+06	2.31578e+06	603570	1.28581e+07	2.84252e+06	8.82867e+06	1.35314e+07	9.41678e+06	2.7417e+06	2.10111e+06	1.51593e+07	3.62557e+06	3.08987e+06	2.61684e+06	473567	1.4092e+06	1.72323e+06	1.01192e+06	418286	9.22418e+06	5.3605e+06	7.30455e+06	6.88788e+07	773693	145179	1.15967e+07	2.90222e+07	1.12086e+08	1.83074e+06	6.70139e+07	1.73066e+06	1.65011e+07	1.51151e+06	1.08841e+07	4.64564e+07	1.49954e+06	220617	1.08504e+08	3.58473e+06
596	3.30509e+06	2.5886e+06	2.60857e+06	1.99009e+07	2.45823e+07	4.29174e+06	1.48892e+07	2.36549e+06	425200	65124.8	668717	1.89703e+06	508052	5.33494e+06	1.25424e+06	6.11523e+06	9.89262e+06	6.19643e+06	1.8673e+06	1.47219e+06	8.69349e+06	2.17095e+06	2.35751e+06	1.19909e+06	334050	1.45921e+06	1.64631e+06	1.19113e+06	426306	8.11549e+06	6.79446e+06	5.76647e+06	6.95658e+07	1.01054e+06	85113.7	8.693e+06	42636790	8.36517e+07	2.60216e+06	3.49276e+07	2.04173e+06	1.37285e+07	2.15993e+06	1.17118e+07	4.72947e+07	1.12435e+06	315417	6.61669e+07	846508
516	2.91042e+06	2.39237e+06	2.09503e+06	1.84888e+07	1.96262e+07	5.45796e+06	1.76235e+07	2.10374e+06	382987	41129	694825	2.3964e+06	622527	5.92224e+06	1.33705e+06	7.16603e+06	7.63852e+06	6.20277e+06	2.1795e+06	1.77249e+06	9.95012e+06	2.47253e+06	1.82248e+06	1.20339e+06	217479	954654	813670	827013	356024	4.38295e+06	6.44546e+06	4.35494e+06	5.11537e+07	925873	67540.3	3.77826e+06	5.07158e+07	9.43691e+07	1.43388e+06	3.12322e+07	1.66161e+06	1.52336e+07	1.79876e+06	9.83652e+06	3.65832e+07	1.6162e+06	579188	7.83889e+07	1.81183e+06
598	1000	3.23116e+06	4.26025e+06	2.1918e+07	2.26259e+07	4.47678e+06	1.49868e+07	2.03395e+06	480666	12023.6	1.13501e+06	3.20478e+06	802511	8.45823e+06	1.78851e+06	1.13261e+07	1.43148e+07	8.50829e+06	3.50515e+06	2.54145e+06	1.51593e+07	3.54648e+06	3.24737e+06	1.73444e+06	384265	1.33765e+06	1.15204e+06	1.02857e+06	512659	6.23679e+06	9.5121e+06	5.82478e+06	6.61994e+07	1.35137e+06	121222	3.9498e+06	5.17631e+07	9.96185e+07	2.12073e+06	3.29447e+07	2.39155e+06	1.52336e+07	2.20486e+06	1.51883e+07	4.88781e+07	1.67193e+06	395389	7.84867e+07	1.14513e+06
601	1000	3.30593e+06	2.52743e+06	2.54362e+07	3.14797e+07	2.70979e+06	2.11525e+07	2.45573e+06	600899	145543	826270	2.6641e+06	708050	8.42372e+06	1.81291e+06	8.12224e+06	9.96577e+06	7.44015e+06	1.92641e+06	1.90355e+06	9.2044e+06	2.27897e+06	2.21766e+06	1.15345e+06	299590	1.45578e+06	1.45982e+06	1.24805e+06	928449	8.5106e+06	7.2861e+06	1.44413e+07	8.71503e+07	1.05005e+06	233636	3.37463e+07	3.13948e+07	1.15896e+08	1.82752e+06	3.70727e+07	3.01898e+06	1.65474e+07	1.59292e+06	1.75788e+07	6.27621e+07	1.27651e+06	197128	1.04457e+08	3.12715e+06
603	3.16161e+06	1.69603e+06	2.42195e+06	1.91821e+07	3.11992e+07	1.90179e+06	1.49242e+07	2.5586e+06	384080	62727.9	705170	2.0603e+06	535604	7.05989e+06	1.51506e+06	5.26409e+06	9.52787e+06	6.67508e+06	977882	1.05508e+06	6.14177e+06	1.52133e+06	2.19924e+06	1.00104e+06	255114	1.64448e+06	1.14796e+06	1.02347e+06	1.0616e+06	6.38879e+06	5.62927e+06	6.67771e+06	9.37103e+07	797234	86413.4	1.85369e+07	2.82232e+07	9.18512e+07	8.96814e+06	4.56267e+07	2.85816e+06	1.36879e+07	1.69402e+06	9.46066e+06	6.12875e+07	867893	197290	7.90301e+07	901328
542	3.19318e+06	2.46547e+06	1.74533e+06	1.87829e+07	2.36262e+07	1.67783e+06	1.32352e+07	2.08352e+06	348877	13505.8	438036	1.78011e+06	472440	4.96289e+06	1.11228e+06	5.52641e+06	8.76083e+06	5.34538e+06	1.17759e+06	1.33167e+06	7.8062e+06	1.97184e+06	2.05424e+06	947107	244147	1.48594e+06	1.37166e+06	1.28919e+06	478710	7.82942e+06	7.67831e+06	4.08939e+06	7.43849e+07	1.09511e+06	153665	1.25853e+07	2.8025e+07	8.24569e+07	2.88222e+06	3.27429e+07	1.85694e+06	1.29419e+07	2.1695e+06	1.16051e+07	4.75951e+07	887092	252755	6.72136e+07	1.13901e+06
599	1000	4.22416e+06	2.16611e+06	2.22426e+07	1.92787e+07	1.73087e+06	1.42908e+07	1.62887e+06	389831	94797.7	650689	2.66375e+06	650585	5.4697e+06	1.21129e+06	1.01813e+07	1.31887e+07	6.30108e+06	2.86423e+06	2.31875e+06	1.26071e+07	3.07695e+06	2.98899e+06	1.00922e+06	233749	1.29771e+06	1.65714e+06	1.43189e+06	296861	9.60157e+06	9.78214e+06	3.08739e+06	6.10875e+07	1.45172e+06	215666	1000	4.72525e+07	7.07141e+07	1.7495e+07	1.95423e+07	1.80145e+06	1.13257e+07	1.50579e+06	1.22178e+07	4.29608e+07	1.58628e+06	377936	5.14934e+07	1.72907e+06
543	3.37923e+06	1.71147e+06	3.78782e+06	1.73192e+07	2.62908e+07	6.07792e+06	2.16804e+07	3.51114e+06	419327	109602	1.02487e+06	2.87723e+06	703137	8.88566e+06	2.01404e+06	8.97756e+06	1.4263e+07	8.6683e+06	3.7599e+06	2.159e+06	1.41601e+07	3.3123e+06	3.21169e+06	2.11329e+06	439414	1.26727e+06	906018	618576	25771.6	5.02144e+06	4.91009e+06	4.64301e+06	6.28605e+07	706027	106988	1000	4.46756e+07	9.68838e+07	1.71922e+06	4.42539e+07	1.18429e+06	1.48068e+07	1.69899e+06	9.46066e+06	4.16969e+07	1.68865e+06	343954	8.16677e+07	2.50448e+06
610	2.58254e+06	2.59451e+06	4.8627e+06	2.21096e+07	3.4004e+07	4.97139e+06	1.5452e+07	2.16469e+06	643447	135899	887655	2.67055e+06	685727	8.01108e+06	1.84187e+06	9.84332e+06	1.52396e+07	8.73917e+06	3.31843e+06	2.17099e+06	1.07436e+07	2.55564e+06	3.56556e+06	1.50195e+06	421016	2.02512e+06	1.73439e+06	1.36506e+06	1.37576e+06	9.28719e+06	8.31136e+06	2.33928e+07	145126702	1.21114e+06	183952	4.68065e+07	4.11076e+07	1.05831e+08	2.7226e+06	4.03465e+07	4.14339e+06	1.49311e+07	1.38506e+06	9.92018e+06	7.70864e+07	1.54025e+06	177664	7.7342e+07	2.15869e+06
614	3.13765e+06	2.33688e+06	1.7596e+06	2.01136e+07	2.40469e+07	2.35465e+06	1.88301e+07	2.83565e+06	436736	143577	549242	1.55742e+06	438245	6.17492e+06	1.38894e+06	6.05345e+06	7.64775e+06	6.15125e+06	2.01549e+06	1.43388e+06	8.40231e+06	2.05748e+06	1.71545e+06	1.12121e+06	278333	1.21048e+06	1.47706e+06	1.04475e+06	1000	7.96482e+06	6.20178e+06	6.4455e+06	6.12648e+07	901499	162267	1000	3.67467e+07	1.08067e+08	535980	4.37258e+07	1.18986e+06	1.60501e+07	1.48483e+06	1.31368e+07	38537076	1.70886e+06	272146	8.97915e+07	3.70974e+06
570	1000	3.1263e+06	5.05716e+06	2.27749e+07	2.72724e+07	2.2728e+06	1.94635e+07	3.1377e+06	514304	112129	630407	2.70686e+06	704759	7.44896e+06	1.58489e+06	9.36007e+06	1.1626e+07	7.48262e+06	2.78548e+06	2.11639e+06	1.11577e+07	2.76861e+06	2.64368e+06	1.68753e+06	335609	1.49052e+06	1.66096e+06	1.42004e+06	890571	8.80374e+06	8.99113e+06	1.56235e+07	8.20087e+07	1.31691e+06	211883	2.94479e+07	3.23859e+07	101357296	3.80821e+06	4.29866e+07	3.25288e+06	1.49311e+07	1.38023e+06	1.49749e+07	4.90697e+07	1.46269e+06	140774	8.00851e+07	2.98792e+06
613	2.19807e+06	1.82913e+06	5.16162e+06	2.21096e+07	3.44248e+07	2.81725e+06	24952881	4.33975e+06	763158	174614	857356	1.59681e+06	415115	9.82489e+06	2.19829e+06	6.05795e+06	9.11873e+06	7.6392e+06	2.19124e+06	1.40177e+06	1.03295e+07	2.53227e+06	2.01701e+06	1.48412e+06	388725	1.5918e+06	1.8008e+06	1.50296e+06	975794	1.12782e+07	6.83886e+06	3.4371e+07	1.13745e+08	876726	268061	5.06088e+07	1.35548e+07	1.28198e+08	2.23569e+06	6.64309e+07	2.69974e+06	1.6796e+07	951708	1.71193e+07	5.39147e+07	1.33123e+06	113222	1.17117e+08	5.63165e+06
615	3.09878e+06	1.08652e+06	991342	1.07989e+07	1.61934e+07	3.40855e+06	9.85403e+06	1.33601e+06	247559	53832.3	359012	955614	279125	5.11864e+06	1.14603e+06	3.48456e+06	5.93973e+06	4.34423e+06	1.12822e+06	654117	5.20311e+06	1.3179e+06	1.36835e+06	783888	233405	1.11057e+06	1.10101e+06	671081	1000	5.89834e+06	4.93156e+06	423594	5.04497e+07	719391	79973.1	5.80724e+06	3.75396e+07	6.53459e+07	27833.4	3.24261e+07	366328	1.08284e+07	1.46174e+06	7.99856e+06	3.68519e+07	1.15549e+06	521100	5.93008e+07	978355
604	3.17177e+06	2.00999e+06	4.15215e+06	1.8916e+07	2.37664e+07	5.27791e+06	1.95691e+07	3.48011e+06	469536	75219.9	802101	2.01635e+06	504009	8.07158e+06	1.78672e+06	7.58399e+06	9.56403e+06	7.37459e+06	2.08052e+06	1.67419e+06	9.58833e+06	2.30768e+06	2.26075e+06	1.62365e+06	327562	1.16958e+06	797293	923913	306351	6.05274e+06	6.33503e+06	4.73551e+06	5.52367e+07	957799	163291	1.50651e+07	3.19894e+07	9.17394e+07	904789	4.80556e+07	1.40844e+06	1.41852e+07	1.5618e+06	1.29836e+07	3.57986e+07	1.67378e+06	247096	7.97686e+07	4.12856e+06
622	3.13766e+06	1.53638e+06	3.31244e+06	1.71861e+07	2.44676e+07	5.09154e+06	1.70355e+07	3.22555e+06	475658	102795	866388	1.91606e+06	474382	8.21578e+06	1.83418e+06	7.70506e+06	1.10401e+07	7.69283e+06	3.03256e+06	1.87143e+06	1.01224e+07	2.5022e+06	2.47853e+06	1.80719e+06	359681	1.30533e+06	1.39535e+06	1.14425e+06	139396	7.24068e+06	5.50898e+06	4.16011e+06	6.32151e+07	826655	132554	1.7049e+07	3.93236e+07	7.68651e+07	3.94246e+06	4.61547e+07	1.21624e+06	1.20717e+07	1.24767e+06	1.20646e+07	4.25395e+07	1.45226e+06	349007	6.96402e+07	1.80566e+06
625	2.65926e+06	1.69549e+06	2.17516e+06	1.38595e+07	1.03033e+07	3.16892e+06	7.62218e+06	1.10639e+06	372269	60985.2	782940	1.96535e+06	517442	6.54059e+06	1.59333e+06	5.54941e+06	7.414e+06	6.03971e+06	1.28155e+06	1.15704e+06	5.88101e+06	1.47729e+06	1.67032e+06	868923	211431	1.08113e+06	1.11714e+06	1.2392e+06	314897	6.23302e+06	8.50628e+06	3.34174e+06	4.84994e+07	1.23413e+06	197501	1000	4.13058e+07	8.29043e+07	1.14222e+06	4.33034e+07	1.79014e+06	1.29419e+07	1.98883e+06	1.49749e+07	3.24282e+07	1.83825e+06	435511	6.70026e+07	2.59986e+06
624	2.90116e+06	1.91871e+06	3.67844e+06	1.67869e+07	1.8858e+07	4.16523e+06	1.46075e+07	2.10912e+06	386540	29541.1	665376	1.72682e+06	461115	6.37702e+06	1.46184e+06	6.4134e+06	7.96721e+06	6.57774e+06	1.81642e+06	1.53053e+06	8.5727e+06	2.09403e+06	1.94621e+06	1.22252e+06	365964	1.14414e+06	910419	1.00761e+06	147142	6.39584e+06	6.62643e+06	2.78672e+06	4.67264e+07	927683	207073	1.10975e+07	3.37734e+07	9.1963e+07	785589	3.90792e+07	1.36084e+06	1.45582e+07	1.95217e+06	1.46685e+07	3.24282e+07	1.41643e+06	317126	7.12228e+07	2.07995e+06
618	3.39044e+06	2.38986e+06	2.74912e+06	1.78515e+07	2.19433e+07	4.78782e+06	1.4502e+07	3.05593e+06	465192	137406	576881	1.93457e+06	507861	5.98502e+06	1.3443e+06	6.34383e+06	8.14749e+06	6.0514e+06	1.72315e+06	1.36632e+06	6.31157e+06	1.58593e+06	1.91813e+06	1.05762e+06	191448	1.44858e+06	1.60127e+06	1.34786e+06	701053	8.39731e+06	8.18169e+06	7.45429e+06	7.70443e+07	1.21243e+06	243255	1000	4.66578e+07	8.53647e+07	4.48859e+06	4.90061e+07	2.38373e+06	1.33149e+07	1.01568e+06	9.00114e+06	4.59099e+07	1.36104e+06	387650	6.37319e+07	2.25971e+06
629	2.6545e+06	3.05047e+06	2.01195e+06	2.17104e+07	2.81139e+07	2.4612e+06	19357946	3.26433e+06	516763	144578	1.14478e+06	3.3309e+06	842310	9.19367e+06	1.96315e+06	9.81303e+06	1.2212e+07	9.03539e+06	2.72226e+06	2.01658e+06	1.18824e+07	2.8174e+06	2.78341e+06	1.88931e+06	411770	1.44984e+06	1.61084e+06	1.31072e+06	510549	9.39198e+06	8.18157e+06	1.3259e+07	8.73276e+07	1.18584e+06	53129.8	1000	3.97201e+07	1.12541e+08	3.60539e+06	4.97453e+07	2.41466e+06	1.6796e+07	1.27741e+06	1.05329e+07	4.75951e+07	1.50222e+06	199326	8.04016e+07	2.40309e+06
627	1.95597e+06	1.01091e+06	3.66837e+06	2.53032e+07	4.6205e+07	2.7858e+06	8.2585e+06	1.32396e+06	783023	115517	739645	1.98233e+06	526935	6.49235e+06	1.60987e+06	8.69693e+06	1.2505e+07	6.44357e+06	2.84934e+06	1.90271e+06	1.05365e+07	2.57401e+06	2.86111e+06	1.32081e+06	397654	3.0841e+06	1.68082e+06	1.13816e+06	2.87768e+06	8.83306e+06	6.38475e+06	3.99446e+07	279873065	856132	111815	6.5157e+07	3.13948e+07	9.28577e+07	5.87592e+06	3.99241e+07	5.68588e+06	1.24446e+07	590591	9.30749e+06	1.12265e+08	463577	1000	5.67687e+07	1.08807e+06
628	2.9758e+06	1.65106e+06	2.34423e+06	1.78515e+07	2.2364e+07	2.35652e+06	1.74578e+07	1.58672e+06	456005	120024	610306	1.71193e+06	456842	6.44775e+06	1.36039e+06	6.49854e+06	7.98007e+06	5.80976e+06	1.12912e+06	1.39277e+06	8.6188e+06	2.14057e+06	1.84371e+06	771638	209710	1.22457e+06	1.50322e+06	1.08425e+06	70415.7	7.87042e+06	5.35924e+06	2.18647e+06	5.3641e+07	789011	159109	9.44427e+06	2.38624e+07	9.24104e+07	609755	2.14432e+07	1.1316e+06	1.49311e+07	2.05099e+06	7.51173e+06	3.68519e+07	727260	180754	7.6498e+07	2.22707e+06
617	3.09787e+06	1.24678e+06	5.18147e+06	1.692e+07	2.22238e+07	4.1411e+06	1.40797e+07	1.17069e+06	468008	32407.4	807703	1.67722e+06	432166	8.10455e+06	1.89039e+06	7.97635e+06	1.31887e+07	8.38135e+06	2.97387e+06	2.02015e+06	1.17789e+07	2.92015e+06	2.99352e+06	1.21312e+06	287897	1.47503e+06	959433	708762	121431	5.29062e+06	4.61621e+06	7.85432e+06	7.52714e+07	650574	123845	2.13473e+07	3.5161e+07	9.94561e+07	1.99306e+07	3.0314e+07	1.58734e+06	1.50555e+07	2.16141e+06	9.61383e+06	4.78058e+07	1.46991e+06	241129	8.46218e+07	2.79919e+06
631	3.12742e+06	3.22076e+06	2.68812e+06	1.87829e+07	2.60103e+07	1.87869e+06	1.51354e+07	2.08783e+06	464685	86127.4	525157	2.06793e+06	562424	5.78773e+06	1.29454e+06	5.64091e+06	8.4376e+06	5.86864e+06	1.37967e+06	1.26377e+06	5.55803e+06	1.42026e+06	2.0133e+06	710308	191976	1.53291e+06	1.86558e+06	1.50408e+06	703907	1.05447e+07	9.12878e+06	5.66325e+06	8.16541e+07	1.33985e+06	148896	1.73796e+07	4.36845e+07	8.40226e+07	2.38656e+06	2.40833e+07	2.81732e+06	1.28176e+07	2.19042e+06	1.12987e+07	5.11762e+07	1.06208e+06	278202	5.95118e+07	1.43117e+06
630	3.04093e+06	3.14566e+06	2.01739e+06	2.25088e+07	2.65712e+07	4.87703e+06	1.43964e+07	2.27904e+06	536889	126701	748077	2.70472e+06	717878	6.09715e+06	1.53705e+06	8.24885e+06	9.82465e+06	6.50508e+06	2.61549e+06	1.76163e+06	8.01309e+06	1.98478e+06	2.32942e+06	1.31376e+06	279186	1.41301e+06	1.54636e+06	1.49227e+06	1.00898e+06	9.01211e+06	8.93964e+06	8.6988e+06	8.78595e+07	1.33193e+06	62979.3	1000	5.47849e+07	8.36871e+07	3.56324e+06	3.5383e+07	3.27735e+06	1.23203e+07	1.24575e+06	15587572	5.39147e+07	1.1182e+06	264429	5.84567e+07	1.99224e+06
631a	2.75112e+06	2.84268e+06	3.37796e+06	1.93152e+07	1.91385e+07	4.75938e+06	1.43964e+07	1.84848e+06	420574	50009	914151	3.26005e+06	875106	7.79883e+06	1.75113e+06	9.12568e+06	1.06494e+07	8.22507e+06	2.85641e+06	2.28429e+06	1.03295e+07	2.57117e+06	2.45701e+06	1.25871e+06	319581	1.10941e+06	1.1258e+06	1.08691e+06	711128	5.65339e+06	7.89151e+06	2.42276e+06	4.77902e+07	1.20397e+06	158156	1000	5.28027e+07	8.54765e+07	1.9123e+06	3.30597e+07	2.22112e+06	1.33149e+07	1.07529e+06	1.05329e+07	3.34814e+07	1.53807e+06	423395	6.80576e+07	1.81212e+06
632	1000	3.50206e+06	3.27514e+06	1.97144e+07	1.33886e+07	4.62889e+06	1.2074e+07	1.66376e+06	463433	26065.6	744315	3.11734e+06	829496	6.88288e+06	1.56173e+06	8.74899e+06	7.61324e+06	7.0909e+06	2.41466e+06	2.01268e+06	8.26058e+06	2.03818e+06	1.80861e+06	1.13926e+06	261829	890114	1.3005e+06	1.34301e+06	904638	6.98485e+06	1.08821e+07	3.71431e+06	3.50247e+07	1.59624e+06	191449	1000	5.35955e+07	8.71541e+07	2.20533e+06	3.47494e+07	2.76287e+06	1.35636e+07	2.55549e+06	1.94169e+07	2.56873e+07	1.73377e+06	449367	6.64751e+07	2.32022e+06
635	3.41299e+06	1.68538e+06	2.7211e+06	1.73192e+07	2.53091e+07	4.46846e+06	1.66133e+07	2.35023e+06	536922	28385.8	1000	1.9061e+06	482424	8.71443e+06	1.904e+06	6.84047e+06	9.71958e+06	7.49015e+06	1.88906e+06	1.50024e+06	1.01224e+07	2.43766e+06	2.19149e+06	1.48414e+06	403873	1.44186e+06	1.44106e+06	991872	505967	7.36653e+06	6.25136e+06	7.85432e+06	8.07676e+07	938939	162463	1.80409e+07	3.04037e+07	9.99034e+07	1.42451e+06	4.8478e+07	2.0307e+06	1.48068e+07	1.57684e+06	1.45154e+07	4.56992e+07	1.2515e+06	202681	8.52549e+07	2.74028e+06
637	3.37075e+06	2.76633e+06	1.35477e+06	1.63877e+07	1.63336e+07	4.13125e+06	1.57687e+07	1.30978e+06	457933	67246.1	731148	1.92372e+06	532526	6.5995e+06	1.42047e+06	5.69921e+06	5.95574e+06	7.02188e+06	1.35875e+06	1.34898e+06	7.83712e+06	1.97634e+06	1.32667e+06	885901	180282	985887	1.62087e+06	1.20226e+06	1000	8.4739e+06	7.2795e+06	1000	3.30745e+07	1.06616e+06	126347	1000	3.23859e+07	9.92324e+07	787097	2.86243e+07	126283	1.58014e+07	2.04592e+06	1.09924e+07	2.25275e+07	787780	147605	7.6287e+07	1.94762e+06
656	2.53689e+06	2.07339e+06	3.75936e+06	1.95813e+07	2.37664e+07	4.05394e+06	1.27074e+07	1.44892e+06	338428	88926.6	681079	1.84294e+06	469595	6.11172e+06	1.41692e+06	5.88451e+06	8.5852e+06	5.83607e+06	1.80724e+06	1.42107e+06	6.22763e+06	1.55126e+06	2.01922e+06	752705	154679	1.4303e+06	1.00252e+06	788286	240912	5.45182e+06	6.69958e+06	4.66798e+06	8.02357e+07	934768	120533	1.72143e+07	5.10187e+07	8.59239e+07	1.02942e+06	2.76739e+07	1.94044e+06	1.31906e+07	1.3418e+06	1.16051e+07	5.8549e+07	1.29577e+06	467399	6.75301e+07	1.0821e+06
685	3.18744e+06	1.77115e+06	2.26469e+06	1.74523e+07	2.89553e+07	4.7506e+06	1.42908e+07	2.19249e+06	444617	32451.5	946586	2.43717e+06	649475	8.74718e+06	1.948e+06	6.86274e+06	1.41653e+07	8.4175e+06	2.28749e+06	1.73351e+06	8.74589e+06	2.10267e+06	3.26668e+06	1.32066e+06	337114	1.49059e+06	1.00262e+06	867171	532638	5.49732e+06	5.74639e+06	4.72998e+06	7.89946e+07	860896	95804.6	2.1182e+07	4.36845e+07	7.2839e+07	2.0686e+06	3.834e+07	2.54342e+06	1.16987e+07	1.82484e+06	9.92018e+06	6.42366e+07	1.8949e+06	110388	6.81631e+07	1.81449e+06
638	3.10058e+06	1.64583e+06	4.30239e+06	1.86499e+07	2.93761e+07	5.26695e+06	19357946	3.38619e+06	684083	108755	798471	1.43496e+06	416118	7.89667e+06	1.74452e+06	5.21275e+06	7.32677e+06	6.73734e+06	1.57056e+06	1.16692e+06	6.82973e+06	1.73479e+06	1.82791e+06	1.35678e+06	281175	1.56236e+06	1.35991e+06	1.18828e+06	302224	7.95525e+06	5.5112e+06	9.03659e+06	8.2186e+07	800037	154866	2.56456e+07	3.3377e+07	9.80022e+07	1.93126e+06	5.55536e+07	1.17935e+06	1.46825e+07	1.35047e+06	1.20646e+07	6.10769e+07	2.01492e+06	219022	8.52549e+07	3.37114e+06
687	2.40599e+06	2.22776e+06	2.83494e+06	2.22426e+07	2.93761e+07	5.02251e+06	1.81967e+07	2.66788e+06	587936	162224	796028	1.81632e+06	491030	8.19499e+06	1.79e+06	6.53735e+06	9.16387e+06	7.19777e+06	1.33116e+06	1.4096e+06	8.46079e+06	2.10211e+06	2.11493e+06	1.2261e+06	221228	1.22778e+06	1.64394e+06	1.09139e+06	314783	9.21826e+06	6.56706e+06	8.02321e+06	6.65838e+07	950738	198284	2.31658e+07	3.21876e+07	9.53181e+07	2.4077e+06	4.67884e+07	2.03912e+06	1.44338e+07	1.50303e+06	1.39027e+07	5.18082e+07	1.51193e+06	172013	8.73649e+07	3.45353e+06
640	3.34932e+06	1.2612e+06	1.41252e+06	1.38595e+07	1.8858e+07	4.498e+06	1.62966e+07	3.33966e+06	299989	120260	808989	1.82537e+06	483411	7.41287e+06	1.59201e+06	6.07827e+06	8.14495e+06	7.43385e+06	1.46918e+06	1.47983e+06	8.05935e+06	1.93352e+06	1.89125e+06	1.46575e+06	364654	985548	885815	754290	47939.1	4.54329e+06	4.84592e+06	1000	3.91026e+07	706051	73948.6	2.99681e+06	3.09983e+07	7.50757e+07	1.67378e+06	5.21742e+07	1.68342e+06	1.28176e+07	1.41523e+06	7.9682e+06	2.5266e+07	1.12972e+06	331209	6.83741e+07	1.62776e+06
642	3.19421e+06	2.85999e+06	1.43663e+06	1.87829e+07	2.25042e+07	4.72524e+06	1.41853e+07	3.13635e+06	395928	83042.6	1.11602e+06	3.35926e+06	887376	8.21748e+06	1.80427e+06	1.13383e+07	1.32863e+07	9.3896e+06	3.64273e+06	2.82199e+06	1.09507e+07	2.70759e+06	3.06432e+06	1.97095e+06	412433	1.36619e+06	1.02241e+06	1.03316e+06	93654.4	6.72963e+06	8.74206e+06	4.09375e+06	6.35697e+07	1.26506e+06	182296	1000	5.99386e+07	7.55231e+07	7.02356e+06	4.08745e+07	2.08044e+06	1.16987e+07	2.25844e+06	1.57407e+07	4.97016e+07	1.86464e+06	433214	5.2865e+07	1.62107e+06
641	1.85398e+06	2.15818e+06	2.56414e+06	2.69e+07	3.5126e+07	2.26991e+06	2.18915e+07	2.99072e+06	747265	123507	1.08556e+06	1.98304e+06	515087	1.08413e+07	2.74821e+06	8.88695e+06	1.21144e+07	7.52325e+06	1.87762e+06	1.96475e+06	1.19859e+07	2.8246e+06	2.85518e+06	1.42894e+06	308347	1.62878e+06	1.7759e+06	1.14105e+06	928652	1.03351e+07	5.98773e+06	2.71085e+07	8.85687e+07	833113	214892	4.0359e+07	1.65282e+07	1.15896e+08	3.66786e+06	4.40426e+07	3.37601e+06	1.59258e+07	814381	1.26773e+07	6.57112e+07	211608	1000	9.77044e+07	3.24371e+06
688	2.91305e+06	2.38642e+06	2.01777e+06	1.70531e+07	2.33457e+07	3.07704e+06	19357946	3.18665e+06	332411	13505.8	1.00087e+06	2.87918e+06	763939	8.63918e+06	1.87655e+06	7.72353e+06	8.51016e+06	8.53415e+06	1.92234e+06	1.62523e+06	8.04267e+06	2.02332e+06	1.92851e+06	1.5866e+06	235451	1.01723e+06	419326	884492	555898	3.94445e+06	5.56439e+06	1.29967e+06	4.19394e+07	818633	75614.6	1000	3.91254e+07	9.27459e+07	2.71887e+06	4.64716e+07	1.82157e+06	1.44338e+07	1.85936e+06	9.61383e+06	2.90577e+07	1.43511e+06	323773	7.7131e+07	2.09193e+06
647	2.57141e+06	2.92113e+06	1.9808e+06	2.26418e+07	2.83944e+07	4.90488e+06	1.59799e+07	3.41323e+06	419487	133968	980894	2.53167e+06	653531	8.85684e+06	2.13142e+06	8.77941e+06	1.13331e+07	7.29542e+06	2.7074e+06	1.82352e+06	1.06401e+07	2.59578e+06	2.6561e+06	2.00464e+06	442347	1.5237e+06	1.53127e+06	1.19374e+06	582309	9.21826e+06	8.67577e+06	9.20549e+06	8.44908e+07	1.2717e+06	235741	2.59762e+07	4.3288e+07	9.1292e+07	1.34195e+07	4.78444e+07	2.66535e+06	1.35636e+07	2.15091e+06	1.329e+07	5.9181e+07	1.63535e+06	287212	7.10118e+07	2.01949e+06
646	3.07775e+06	1.75207e+06	1.42876e+06	1.61216e+07	9.18132e+06	2.76628e+06	5.11888e+06	641097	513535	64977.8	673479	1.28034e+06	395073	6.7229e+06	1.94911e+06	3.70787e+06	2.83535e+06	4.53238e+06	450717	694160	2.62387e+06	653576	682180	695226	190095	1.31e+06	1.41638e+06	1.28556e+06	1.26387e+06	1.21166e+07	1.47627e+07	1.3259e+07	6.88886e+07	2.03699e+06	295978	1000	4.20987e+07	102475661	3.36757e+06	4.97453e+07	3.56755e+06	1.53041e+07	3.17763e+06	2.38589e+07	5.18082e+07	2.20616e+06	340643	8.06127e+07	2.36204e+06
645	2.09033e+06	2.33906e+06	1.92701e+06	2.31741e+07	3.14797e+07	3.6818e+06	2.73809e+07	3.48735e+06	568898	89714.1	1.77657e+06	3.46438e+06	833022	1.38906e+07	3.34926e+06	1.15575e+07	1.49466e+07	1.14648e+07	3.92254e+06	2.95166e+06	2.06824e+07	4.8154e+06	3.23361e+06	2.71855e+06	531874	1.36669e+06	1.42576e+06	818183	724335	7.96641e+06	6.32876e+06	2.84597e+07	9.47741e+07	839418	187155	1000	2.4457e+07	1.55039e+08	4.51054e+06	5.9461e+07	2.72842e+06	2.15204e+07	948193	7.29553e+06	4.21182e+07	626457	101161	1.21337e+08	4.08626e+06
708	2.71449e+06	3.17757e+06	3.99539e+06	2.03797e+07	2.05409e+07	4.99647e+06	1.85134e+07	2.57619e+06	312942	61287	689308	2.52982e+06	637077	6.28445e+06	1.34614e+06	7.78989e+06	1.06494e+07	6.28597e+06	2.5923e+06	1.75783e+06	1.09507e+07	2.6336e+06	2.57374e+06	1.1677e+06	293353	1.09638e+06	1.18536e+06	895222	252359	5.83976e+06	6.85973e+06	810562	4.2294e+07	1.06898e+06	122467	1000	4.74507e+07	9.21867e+07	1.39097e+06	2.78851e+07	2.24623e+06	1.48068e+07	2.07916e+06	1.09924e+07	2.9479e+07	1.25892e+06	449696	6.61585e+07	1.47421e+06
648	2.76765e+06	1.13116e+06	2.63817e+06	1.55893e+07	2.1803e+07	3.23274e+06	9.11266e+06	1.34073e+06	211629	50854	1.18596e+06	1.71637e+06	472871	9.90959e+06	2.08127e+06	5.20386e+06	7.78068e+06	8.76767e+06	1.10691e+06	983374	5.68345e+06	1.3905e+06	1.77875e+06	1.15519e+06	197541	1.10278e+06	1.04411e+06	644461	1000	6.06142e+06	3.4463e+06	604366	4.95632e+07	490595	62449	6.63384e+06	3.67467e+07	6.38921e+07	8.73024e+06	3.44326e+07	592940	1.04554e+07	2.04883e+06	1.05329e+07	3.74838e+07	1.24971e+06	284175	5.52916e+07	561365
649	3.11388e+06	2.05658e+06	2.50355e+06	1.8916e+07	2.78334e+07	5.0958e+06	1.76689e+07	3.34917e+06	350676	13505.8	1.36161e+06	3.47297e+06	884205	1.24506e+07	2.5974e+06	9.05007e+06	1.31887e+07	1.06714e+07	2.46313e+06	1.75671e+06	9.91538e+06	2.34588e+06	2.88795e+06	2.26589e+06	371090	1.06782e+06	1.18902e+06	885375	532383	6.42485e+06	5.62408e+06	2.85754e+06	5.1868e+07	859074	152952	1.44039e+07	3.53592e+07	8.02202e+07	2.0367e+06	5.30191e+07	2.07712e+06	1.2569e+07	1.67564e+06	1.22178e+07	4.29608e+07	2.11446e+06	279513	7.43879e+07	2.90905e+06
709	2.65843e+06	2.6546e+06	2.6066e+06	1.8916e+07	2.27847e+07	4.64931e+06	1.76689e+07	2.34025e+06	337701	13505.8	837092	2.27463e+06	599731	7.04004e+06	1.7023e+06	7.19355e+06	8.97526e+06	7.27236e+06	1.89387e+06	1.78759e+06	1.03295e+07	2.56143e+06	2.09133e+06	1.52184e+06	379942	1.23823e+06	1.55904e+06	1.27462e+06	387761	7.93201e+06	8.27723e+06	3.7618e+06	6.26832e+07	1.18155e+06	131465	1000	3.55574e+07	1.06949e+08	2.11073e+06	4.2353e+07	1.17291e+06	1.62987e+07	1.35135e+06	1.31368e+07	3.26388e+07	1.34613e+06	228536	7.692e+07	1.8437e+06
652	2.77592e+06	2.53079e+06	1.58511e+06	1.85423e+07	2.12738e+07	3.92637e+06	1.07981e+07	1.80968e+06	487846	127194	964457	2.96108e+06	756699	7.8589e+06	1.71495e+06	8.95546e+06	1.23337e+07	8.72585e+06	4.18501e+06	2.16572e+06	1.18904e+07	2.86291e+06	2.7843e+06	1.76893e+06	419278	1.36356e+06	1.04631e+06	753184	512082	5.5983e+06	8.29667e+06	6.1118e+06	6.77987e+07	1.16033e+06	119421	5.40871e+06	5.65935e+07	8.01357e+07	2.95071e+06	3.6789e+07	1.87768e+06	1.20206e+07	1.21035e+06	9.31527e+06	4.18039e+07	1.35805e+06	165977	5.66707e+07	1.53561e+06
710	3.10165e+06	1.70865e+06	2.39597e+06	1.62209e+07	2.24691e+07	3.32806e+06	1.49469e+07	2.93186e+06	360790	164618	326164	1.84537e+06	484757	5.16342e+06	1.16481e+06	6.20403e+06	1.07552e+07	5.94586e+06	1.554e+06	1.4819e+06	8.58343e+06	2.11382e+06	2.5789e+06	1.30977e+06	290212	1.16635e+06	677455	926813	92519.4	5.82663e+06	5.24847e+06	1.93535e+06	5.47528e+07	807311	148564	1.09081e+07	2.15655e+07	7.10653e+07	9.66264e+06	3.23325e+07	1.03383e+06	1.12385e+07	1.24233e+06	9.69726e+06	4.13242e+07	838631	369614	5.68827e+07	1.50531e+06
650	3.37353e+06	2.10361e+06	4.96452e+06	1.86873e+07	2.14066e+07	3.78269e+06	1.63298e+07	1.66285e+06	517024	9161.69	1.56775e+06	3.67005e+06	892888	1.24248e+07	3.08408e+06	1.04002e+07	1.44383e+07	1.12171e+07	2.61799e+06	2.5893e+06	1.65921e+07	3.90638e+06	3.15568e+06	1.66282e+06	286105	1.2988e+06	748277	1.02255e+06	667183	7.483e+06	7.05348e+06	1.00541e+07	7.51258e+07	972460	159551	1.40301e+06	2.57398e+07	1.30022e+08	2.23543e+06	4.83106e+07	2.1848e+06	1.90592e+07	1.71697e+06	1.26259e+07	4.18039e+07	1.12279e+06	1000	1.11784e+08	3.00002e+06
712	3.1793e+06	1.9039e+06	2.5641e+06	1.59307e+07	2.03442e+07	3.73889e+06	1.50533e+07	2.6014e+06	286132	54088.3	607824	2.36127e+06	597413	6.40873e+06	1.38853e+06	7.0885e+06	1.03343e+07	6.72047e+06	2.12022e+06	1.42345e+06	8.35045e+06	2.03665e+06	2.33568e+06	1.34609e+06	334583	996799	1.20734e+06	986983	75062.4	6.41743e+06	5.32836e+06	1000	3.56307e+07	794572	88308.7	894245	2.93696e+07	6.8445e+07	1000	3.17891e+07	898127	1.11268e+07	847378	7.18865e+06	3.41284e+07	952538	474068	5.62468e+07	1.38383e+06
711	2.7875e+06	2.74641e+06	3.43669e+06	2.05735e+07	2.12738e+07	4.68211e+06	1.93085e+07	2.43277e+06	563145	115463	1.04299e+06	2.54507e+06	649411	8.21224e+06	1.82647e+06	8.49918e+06	1.04395e+07	8.918e+06	2.10138e+06	1.74754e+06	1.00738e+07	2.46666e+06	2.35015e+06	1.12613e+06	281154	1.22062e+06	1.47113e+06	1.18958e+06	252930	8.6393e+06	8.55334e+06	5.83573e+06	5.86844e+07	1.21256e+06	174630	3.05503e+06	3.80813e+07	1.1289e+08	1000	3.88542e+07	1.45356e+06	1.62661e+07	2.05367e+06	1.41539e+07	3.85658e+07	1.54358e+06	201722	8.43333e+07	4.43195e+06
653	3.0473e+06	1.69255e+06	5.54106e+06	2.12989e+07	2.28675e+07	3.46641e+06	1.56916e+07	2.05951e+06	543060	26778.7	869046	1.89055e+06	474777	9.70184e+06	2.10204e+06	7.29218e+06	9.06323e+06	8.14515e+06	1.16538e+06	1.8183e+06	9.8601e+06	2.43681e+06	2.11013e+06	1.44475e+06	412769	1.2716e+06	1.4197e+06	841770	310976	7.23968e+06	4.84311e+06	9.05673e+06	6.79774e+07	704666	195425	2.25314e+07	2.44693e+07	1.17929e+08	3.49288e+06	4.74411e+07	1.53883e+06	1.64895e+07	2.12617e+06	1.51725e+07	4.57616e+07	1.15487e+06	177159	1.01185e+08	2.23866e+06
658	2.95508e+06	1.19893e+06	2.60647e+06	1.59307e+07	2.22035e+07	3.19873e+06	1.133e+07	2.04912e+06	427152	13166.6	424676	1.20796e+06	330398	7.25138e+06	1.39624e+06	3.88128e+06	5.77058e+06	5.44305e+06	816680	762844	4.02451e+06	970458	1.28859e+06	818298	244026	1.35375e+06	991279	696744	181171	5.16472e+06	4.29989e+06	7.69167e+06	7.38749e+07	614421	121684	1.99028e+07	3.3907e+07	8.33607e+07	1.18576e+06	5.2115e+07	1.52858e+06	1.28027e+07	1.51037e+06	1.12252e+07	5.31973e+07	1.63808e+06	162390	8.16837e+07	1.72116e+06
654	3.0247e+06	2.23368e+06	6.79992e+06	2.21695e+07	2.69844e+07	4.8298e+06	1.73936e+07	2.20597e+06	725127	145512	954406	2.54211e+06	653494	8.68372e+06	2.13387e+06	9.32087e+06	1.42278e+07	8.66887e+06	3.44813e+06	2.10761e+06	1.1463e+07	2.72085e+06	3.24831e+06	1.39401e+06	412159	1.56108e+06	2.04984e+06	1.53068e+06	767144	1.35313e+07	8.66332e+06	1.99259e+07	1.05685e+08	1.1785e+06	247743	5.6028e+06	5.22377e+07	1.1289e+08	1.59876e+06	39615069	3.33981e+06	1.57075e+07	2.00052e+06	1.59365e+07	5.91938e+07	2.40147e+06	183639	8.65591e+07	3.20471e+06
713	735930	4.14627e+06	5.54955e+06	2.69574e+07	2.32659e+07	5.47136e+06	1.89893e+07	918807	760100	88772.8	1.14298e+06	3.81112e+06	986952	1.1038e+07	2.58834e+06	1.1873e+07	1.065e+07	9.91841e+06	3.3016e+06	2.7301e+06	1.09287e+07	2.57445e+06	2.40467e+06	775971	167118	1.13906e+06	1.73337e+06	1.588e+06	1.4705e+06	1.09774e+07	1.25443e+07	2.36472e+07	6.44032e+07	1.68062e+06	383281	5.61545e+06	4.62485e+07	1.22968e+08	2.86854e+06	2.08109e+07	4.25293e+06	1.66012e+07	2.52826e+06	1.82285e+07	4.24036e+07	1.56816e+06	103356	9.5356e+07	6.24534e+06
660	3.18646e+06	2.61663e+06	2.73056e+06	1.88324e+07	2.12738e+07	5.34622e+06	1.76064e+07	3.28172e+06	478321	60020.3	522645	2.55877e+06	676776	7.13146e+06	1.55762e+06	7.74946e+06	6.9842e+06	6.66815e+06	2.26471e+06	1.88404e+06	8.31356e+06	2.02037e+06	1.57387e+06	1.55481e+06	284438	962446	1.19284e+06	1.1228e+06	584387	6.25528e+06	8.28242e+06	3.12559e+06	4.38514e+07	1.18382e+06	206152	3.7537e+06	4.4978e+07	9.53537e+07	1.50185e+06	4.91802e+07	1.84728e+06	1.38082e+07	1.85695e+06	1.55545e+07	4.03647e+07	2.1455e+06	335596	7.98819e+07	3.9974e+06
673	3.79538e+06	1.90939e+06	2.52202e+06	1.60758e+07	2.87109e+07	5.79008e+06	2.29253e+07	4.53091e+06	522154	125849	850776	2.34748e+06	601640	8.8224e+06	2.092e+06	8.29745e+06	1.28598e+07	8.19657e+06	2.64525e+06	1.6941e+06	1.09287e+07	2.65923e+06	2.96675e+06	1.91098e+06	448943	1.33764e+06	1.16612e+06	1.10023e+06	424552	6.63584e+06	5.76305e+06	6.5436e+06	6.54754e+07	853770	143277	2.64553e+06	3.64479e+07	9.18263e+07	3.81609e+06	4.65715e+07	1.53234e+06	1.40316e+07	1.19244e+06	9.4426e+06	4.44424e+07	1.36834e+06	272183	7.21448e+07	2.10635e+06
671	3.34083e+06	1.70822e+06	2.65961e+06	1.72365e+07	2.69844e+07	4.51149e+06	2.11169e+07	2.7824e+06	448055	119416	531132	1.80987e+06	489409	7.13169e+06	1.55974e+06	6.58609e+06	1.04395e+07	6.82225e+06	2.17965e+06	1.6388e+06	1.11424e+07	2.72837e+06	2.43815e+06	1.45972e+06	353580	1.34447e+06	1.23739e+06	862684	213390	7.58253e+06	5.74783e+06	8.853e+06	7.22665e+07	854834	142348	1.96639e+07	2.70102e+07	1.04827e+08	102637	4.16803e+07	1.58773e+06	1.58192e+07	1.29364e+06	1.13526e+07	4.87599e+07	1.15387e+06	216987	8.92087e+07	2.62335e+06
674	2.57097e+06	2.02853e+06	1.95726e+06	1.46249e+07	1.55633e+07	1.69589e+06	7.73792e+06	1.12464e+06	364282	111119	624032	2.26629e+06	624065	6.00237e+06	1.30617e+06	6.22701e+06	7.83774e+06	6.84382e+06	1.55774e+06	1.39089e+06	6.47988e+06	1.60541e+06	2.03807e+06	1.05691e+06	369511	1.45404e+06	1.35127e+06	1.27717e+06	620049	7.56687e+06	9.98694e+06	7.55937e+06	7.67342e+07	1.42487e+06	103222	1.52225e+07	3.91702e+07	8.93068e+07	5.84264e+06	3.63542e+07	2.38731e+06	1.40316e+07	1.23299e+06	9.4426e+06	4.55217e+07	1.01443e+06	220104	5.91084e+07	1.18418e+06
677	3.33219e+06	2.2038e+06	2.65062e+06	1.82521e+07	2.32659e+07	4.22684e+06	1.89893e+07	1.96924e+06	443718	49145.2	844840	2.59976e+06	661387	8.29824e+06	1.77751e+06	7.99288e+06	1.27546e+07	7.74058e+06	1.8747e+06	1.73821e+06	1.2211e+07	2.86812e+06	2.87398e+06	1.25925e+06	277565	1.14014e+06	1.13349e+06	825975	650493	5.72258e+06	6.76827e+06	5.0904e+06	6.06502e+07	960067	126684	1.6783e+06	2.97326e+07	1.15913e+08	1.26783e+06	3.5376e+07	2.8816e+06	1.6713e+07	1.3838e+06	1.03339e+07	4.07245e+07	834898	246664	9.39781e+07	1.84239e+06
719	2.82008e+06	1.80266e+06	2.3915e+06	1.91226e+07	2.28675e+07	4.54882e+06	1.6649e+07	2.2101e+06	589252	153432	460227	1.59994e+06	449227	7.45164e+06	1.62987e+06	5.65989e+06	6.5329e+06	5.66868e+06	1.33568e+06	1.31485e+06	6.17964e+06	1.58724e+06	1.49881e+06	855650	194520	1.18911e+06	1.22729e+06	1.07689e+06	420198	6.73114e+06	6.61261e+06	8.29592e+06	6.17225e+07	955108	258734	2.87217e+06	3.60849e+07	9.87802e+07	51358.9	4.24411e+07	1.50352e+06	1.43668e+07	2.54883e+06	1.75918e+07	4.73207e+07	2.01202e+06	226665	9.21764e+07	4.1094e+06
678	3.52785e+06	1.40144e+06	1.83787e+06	1.46249e+07	2.45939e+07	4.93699e+06	2.18616e+07	3.25693e+06	403591	49210	652059	1.67866e+06	466823	7.40846e+06	1.6441e+06	6.0079e+06	8.4506e+06	7.03807e+06	1.61452e+06	1.49196e+06	9.24148e+06	2.28904e+06	2.02141e+06	1.32292e+06	348136	1.2459e+06	1.36749e+06	790953	220018	5.93224e+06	4.12017e+06	2.31128e+06	4.97488e+07	627669	88631.2	1.03909e+07	2.12025e+07	9.87802e+07	427823	4.1789e+07	1.39459e+06	1.53723e+07	675496	6.25284e+06	3.40084e+07	626177	259414	8.17896e+07	1.68919e+06
680	671413	3.09675e+06	3.0974e+06	2.304e+07	2.45939e+07	5.14897e+06	1.87766e+07	3.09716e+06	521817	119882	648619	2.76611e+06	700066	7.42268e+06	1.78046e+06	8.7555e+06	8.49015e+06	6.66811e+06	2.05682e+06	2.08898e+06	9.09125e+06	2.24225e+06	1.9924e+06	1.47295e+06	270869	1.13324e+06	1.50455e+06	1.58018e+06	636046	7.71434e+06	9.17746e+06	7.09636e+06	5.81483e+07	1.329e+06	254801	2.80832e+06	3.88073e+07	8.79966e+07	2.61487e+06	4.15716e+07	1.53625e+06	1.28027e+07	1.70298e+06	1.75918e+07	5.00791e+07	2.25811e+06	227966	7.46885e+07	3.46181e+06
720	3.31903e+06	2.38115e+06	2.88567e+06	1.83972e+07	3.13669e+07	1.46751e+06	2.40955e+07	4.12296e+06	593639	117885	518905	1.93921e+06	501455	6.96647e+06	1.48987e+06	7.44567e+06	1.14918e+07	6.02442e+06	2.1684e+06	1.55214e+06	8.79061e+06	2.13324e+06	2.72029e+06	1.4395e+06	398294	1.61155e+06	1.89156e+06	1.32892e+06	585807	1.01532e+07	6.39164e+06	1.06664e+07	8.99589e+07	961572	132191	1.70353e+07	3.06401e+07	9.3338e+07	641660	3.41803e+07	2.00044e+06	1.36964e+07	1.37238e+06	1.04612e+07	4.5162e+07	990545	220730	6.70574e+07	1.89058e+06
721	701641	3.52667e+06	2.53176e+06	1.89775e+07	1.95474e+07	3.34532e+06	1.07981e+07	2.01179e+06	365526	50030.1	510654	2.16871e+06	562845	6.46463e+06	1.50727e+06	6.07451e+06	5.04148e+06	6.02712e+06	1.67023e+06	1.34842e+06	4.32316e+06	1.06711e+06	1.23412e+06	824290	251688	996871	1.52636e+06	1.32161e+06	537503	8.41545e+06	1.01063e+07	1.2968e+06	4.56385e+07	1.49459e+06	200581	3.00988e+06	4.38891e+07	6.15919e+07	4.50844e+06	3.13543e+07	2.38549e+06	9.67441e+06	2.39456e+06	1.67005e+07	4.07245e+07	1.63733e+06	403788	5.05235e+07	1.72203e+06
684	660525	2.97581e+06	1.83466e+06	1.69463e+07	1.54304e+07	3360353	1.17555e+07	1.79713e+06	375485	82847.6	644444	2.65335e+06	712869	5.76893e+06	1.46179e+06	7.957e+06	8.04709e+06	6.74494e+06	2.00513e+06	1.62613e+06	8.04017e+06	1.91611e+06	1.83941e+06	1.33525e+06	241636	890420	941101	1.09877e+06	340962	5.75218e+06	8.53393e+06	1000	3.24139e+07	1.26222e+06	190235	1.74239e+06	3.53589e+07	7.02591e+07	858900	3.37456e+07	1.59615e+06	1.1462e+07	1.99341e+06	1.37719e+07	3.34088e+07	1.36779e+06	425581	5.58228e+07	2.08334e+06
730	3.16507e+06	969711	1.75459e+06	1.54954e+07	2.55236e+07	2.77537e+06	1.09045e+07	3.16821e+06	394397	86110.5	908332	1.25585e+06	342137	7.85415e+06	1.75319e+06	4.27281e+06	7.18679e+06	7.44214e+06	950898	889278	5.62564e+06	1.41901e+06	1.66804e+06	1.4243e+06	241697	1.44425e+06	1.4385e+06	661273	158659	7.31578e+06	3.77836e+06	1.08375e+07	9.01376e+07	539214	84207.5	1.47456e+07	2.30174e+07	6.71349e+07	1.84173e+07	8.38538e+07	1.11686e+06	1.15737e+07	1.24908e+06	9.56993e+06	4.01249e+07	1.07998e+06	1000	6.41958e+07	1.62692e+06
683	688266	3.34419e+06	3.66131e+06	2.60868e+07	3.04373e+07	1.04021e+06	2.21807e+07	2.5864e+06	557787	76602.5	1.39412e+06	2.84178e+06	722927	1.16781e+07	2.52202e+06	1.01898e+07	1.30703e+07	1.05678e+07	2.62842e+06	2.38412e+06	1.15698e+07	2.70276e+06	2.89982e+06	1.55463e+06	252739	1.28628e+06	1.65091e+06	1.11564e+06	438717	9.46592e+06	6.17918e+06	9.71514e+06	7.51258e+07	860079	140934	3.82521e+06	3.91702e+07	1.16921e+08	1.32025e+06	3.63542e+07	2.52301e+06	1.63778e+07	1.40915e+06	1.26259e+07	4.5042e+07	1.42333e+06	152025	8.95267e+07	2.65413e+06
682	3.04185e+06	2.09263e+06	3.09131e+06	1.94128e+07	2.73828e+07	4.87787e+06	2.10105e+07	3.67899e+06	545800	110132	999747	2.62612e+06	657053	8.77496e+06	1.98383e+06	1.05054e+07	1.60167e+07	7.59261e+06	3.35699e+06	2.49566e+06	1.6699e+07	3.83649e+06	3.61865e+06	2.46269e+06	561131	1.39522e+06	1.90658e+06	1.41867e+06	417695	1.04583e+07	6.81778e+06	1.03271e+07	8.26317e+07	995975	168398	2.18145e+07	3.2092e+07	8.5981e+07	6.83682e+06	4.63541e+07	1.75169e+06	1.43668e+07	1.74236e+06	1.26259e+07	5.46364e+07	1.34169e+06	277218	8.17896e+07	2.22057e+06
731	2.00963e+06	521823	2.34453e+06	2.71024e+07	6.07167e+07	1.06884e+06	8.28504e+06	879535	946969	159740	346713	730394	192828	6.50423e+06	1.35423e+06	4.46964e+06	4.6187e+06	4.48159e+06	843983	740403	3.57441e+06	829355	947511	497434	163106	3.19105e+06	1.31985e+06	834550	3.80627e+06	9.38669e+06	4.7612e+06	5.72317e+07	294404414	457065	163867	1.16681e+08	3.40885e+07	1.05835e+08	1.63773e+07	3.84194e+07	7.5312e+06	1.33613e+07	1.35117e+06	1.69551e+07	1.37268e+08	1.13787e+06	1000	7.19328e+07	2.70126e+06
686	3.3631e+06	1.343e+06	1.53577e+06	1.52052e+07	2.41955e+07	3.81704e+06	1.89893e+07	2.51868e+06	413926	121618	593278	1.32618e+06	367232	5.94041e+06	1.29139e+06	4.88158e+06	7.73506e+06	5.66981e+06	973826	1.05404e+06	8.1292e+06	2.03237e+06	1.73171e+06	1.17149e+06	269093	1.34373e+06	640887	945817	424417	4.99043e+06	4.6401e+06	4.07683e+06	5.86844e+07	670669	89442.9	1.07853e+07	1.66652e+07	8.98107e+07	1.0947e+06	4.51585e+07	1.5064e+06	1.59309e+07	874006	7.18652e+06	3.58074e+07	642089	80779.4	8.04118e+07	2.03993e+06
687a	741415	3.80715e+06	2.57158e+06	2.20244e+07	2.30003e+07	4.22744e+06	1.42023e+07	3.09339e+06	427411	115663	737996	3.02506e+06	790598	6.53285e+06	1.59749e+06	9.76898e+06	1.04395e+07	7.20474e+06	2.86638e+06	2.14536e+06	8.96251e+06	2.20434e+06	2.47488e+06	1.42955e+06	298709	1.44116e+06	1.56783e+06	1.63471e+06	951797	9.99225e+06	1.26623e+07	8.96785e+06	7.42323e+07	1.84358e+06	238328	6.05202e+06	5.47786e+07	8.37638e+07	1.03197e+07	4.22237e+07	2.85175e+06	1.25792e+07	2.42502e+06	1.67005e+07	5.59557e+07	1.67984e+06	349987	6.04862e+07	1.97283e+06
693	2.86896e+06	2.45829e+06	2.5325e+06	2.20244e+07	2.93749e+07	3.67672e+06	1.67554e+07	2.93011e+06	475083	9161.69	878815	2.02992e+06	535569	9.02247e+06	1.98354e+06	6.30771e+06	9.34959e+06	7.56971e+06	1.3547e+06	1.28478e+06	8.01362e+06	2.00089e+06	2.18578e+06	1.30023e+06	328642	1.49867e+06	1.55264e+06	1.24292e+06	618133	8.26068e+06	7.39263e+06	9.4931e+06	8.26317e+07	1.08735e+06	131432	1.99028e+07	3.00956e+07	9.43458e+07	4.99674e+06	4.54846e+07	2.26522e+06	1.42551e+07	1.75991e+06	1.26259e+07	6.14725e+07	1.19236e+06	272319	8.56052e+07	1.98169e+06
692	639571	2.77015e+06	3.65416e+06	2.43458e+07	2.85781e+07	5.99627e+06	2.09041e+07	4.11127e+06	625611	61994.6	1.21575e+06	2.70415e+06	695631	1.1038e+07	2.35546e+06	1.05054e+07	1.1597e+07	9.31616e+06	3.48444e+06	2.47018e+06	1.23178e+07	2.95722e+06	2.67079e+06	2.62187e+06	408705	1.41143e+06	1.43974e+06	987935	386418	7.97981e+06	7.61347e+06	1.0819e+07	7.97723e+07	1.11955e+06	177961	4.93461e+06	5.16932e+07	1.07851e+08	5.12485e+06	5.59193e+07	1.93667e+06	1.50371e+07	2.53153e+06	1.72098e+07	5.22378e+07	1.91889e+06	296402	8.39094e+07	2.6035e+06
732	3.28231e+06	1.90147e+06	1.86188e+06	1.43347e+07	1.84849e+07	4.45951e+06	1.30321e+07	2.65489e+06	356665	99251.7	912871	2.04856e+06	514704	7.97685e+06	1.7784e+06	6.24696e+06	8.65126e+06	7.79513e+06	2.7404e+06	1.56125e+06	9.75324e+06	2.35785e+06	2.03946e+06	1.71784e+06	428377	1.02427e+06	1.21875e+06	1.01093e+06	147185	5.40755e+06	5.99672e+06	1000	4.04559e+07	880116	67585.7	4.08082e+06	5.13303e+07	7.46935e+07	1.0834e+07	4.76585e+07	2.97528e+06	1.25792e+07	944819	7.41842e+06	3.26892e+07	1.40239e+06	515909	63983821	1.58743e+06
689	2.72843e+06	2.50917e+06	3.62512e+06	2.24596e+07	2.56564e+07	5.41869e+06	2.46274e+07	3.20837e+06	541807	9161.69	1.02055e+06	2.70398e+06	702365	1.02914e+07	2.20517e+06	7.72126e+06	1.05447e+07	8.47505e+06	2.35037e+06	1.85924e+06	1.41344e+07	3.41991e+06	2.37781e+06	1.74901e+06	354995	1.30061e+06	1.68432e+06	1.11607e+06	679599	7.70784e+06	6.16514e+06	5.97637e+06	6.27948e+07	911630	116639	2.68596e+06	3.51774e+07	1.30022e+08	4.47926e+06	4.50498e+07	2.80782e+06	1.8724e+07	1.72389e+06	1.21166e+07	4.31231e+07	1.2233e+06	264806	1.12844e+08	2.04909e+06
695	3.33646e+06	1.84598e+06	2.21295e+06	1.68012e+07	2.60548e+07	4.26563e+06	1.54788e+07	2.62751e+06	356294	96068.8	1.24236e+06	2.20382e+06	586330	9.36235e+06	2.30966e+06	7.62565e+06	1.28598e+07	8.4119e+06	2.71528e+06	1.72094e+06	1.01807e+07	2.51012e+06	2.95807e+06	1.69394e+06	349097	1.46656e+06	1.12505e+06	799339	329828	5.10848e+06	5.55661e+06	6.53394e+06	7.69129e+07	849308	87899.6	3.21354e+06	4.40706e+07	8.35622e+07	4.07289e+06	4.35281e+07	1.84345e+06	1.38082e+07	1.02414e+06	8.29662e+06	4.64812e+07	1.23736e+06	416771	6.41958e+07	1.52823e+06
714	2.94424e+06	2.38589e+06	2.9613e+06	2.10088e+07	2.71172e+07	4.32679e+06	1.80319e+07	2.32429e+06	419423	52019.3	900226	2.49827e+06	655044	6.36299e+06	1.39989e+06	8.21756e+06	1.37017e+07	6.83846e+06	2.55314e+06	1.84779e+06	1.26384e+07	3.1394e+06	3.08185e+06	1.42301e+06	343705	1.6955e+06	1.49967e+06	1.02302e+06	368934	7.22642e+06	6.94973e+06	8.69413e+06	8.54911e+07	1.07513e+06	99289.9	1.63185e+07	3.75368e+07	8.80974e+07	1.36218e+06	3.11369e+07	1.89017e+06	1.4702e+07	1.16985e+06	9.18794e+06	4.95994e+07	808108	311255	6.58916e+07	1.41518e+06
728	656904	2.94041e+06	3.50319e+06	2.07186e+07	2.53908e+07	5.47654e+06	2.02659e+07	3.10861e+06	446297	144142	1.1513e+06	2.73919e+06	695784	8.52224e+06	1.88445e+06	9.29779e+06	1.24389e+07	8.27626e+06	3.60788e+06	2.20869e+06	1.21041e+07	3.02144e+06	2.80037e+06	2.05646e+06	449010	1.41232e+06	1.00986e+06	1.36321e+06	642724	9.05395e+06	8.27565e+06	7.88797e+06	7.20877e+07	1.23031e+06	134090	5.21115e+06	4.73374e+07	1.10874e+08	2.83853e+06	4.74411e+07	2.25158e+06	1.64895e+07	1.54365e+06	1.12252e+07	4.36029e+07	1.34589e+06	321271	7.9034e+07	2.27214e+06
744	3.21552e+06	3.12578e+06	2.65332e+06	1.83972e+07	2.35315e+07	3.09766e+06	1.30321e+07	2.08085e+06	313032	44879.5	604308	2.79277e+06	735268	4.8536e+06	1.08878e+06	6.42206e+06	9.70289e+06	6.0995e+06	1.72789e+06	1.34438e+06	7.22197e+06	1.82071e+06	2.33055e+06	1.13412e+06	230747	1.41589e+06	1.40055e+06	1.23145e+06	595054	6.46985e+06	8.35916e+06	4.40391e+06	6.79774e+07	1.2115e+06	86269.9	2.1148e+06	3.62664e+07	8.19497e+07	4.0423e+06	3.34195e+07	2.43383e+06	1.33613e+07	950576	7.83248e+06	4.02448e+07	883644	338664	5.79426e+07	1.21922e+06
746	2.82494e+06	2.09406e+06	2.73195e+06	2.01382e+07	2.96405e+07	2.86366e+06	1.29257e+07	1.36513e+06	364748	56560.6	580641	1.62937e+06	450786	5.66949e+06	1.28515e+06	6.70883e+06	1.13866e+07	6.07949e+06	1.74412e+06	2.17943e+06	7.73504e+06	1.99599e+06	2.66303e+06	896405	235387	1.76315e+06	758355	1.06007e+06	680240	6.58123e+06	7.34189e+06	1.26514e+07	1.05149e+08	1.10731e+06	125019	2.08587e+07	3.33625e+07	8.64849e+07	790794	2.71152e+07	3.08409e+06	1.30261e+07	1.36891e+06	1.05886e+07	6.24319e+07	1.0732e+06	247506	6.77994e+07	1.84475e+06
745	3.14667e+06	1.9582e+06	2.04491e+06	1.9848e+07	2.73828e+07	3.3265e+06	1.29257e+07	1.55318e+06	412082	82702.6	1.03764e+06	2.35764e+06	611375	7.85563e+06	1.84868e+06	6.87272e+06	9.70289e+06	7.45871e+06	1.59103e+06	1.65142e+06	8.17452e+06	2.0937e+06	2.23325e+06	937605	245327	1.67024e+06	1.35984e+06	1.03599e+06	685188	8.29179e+06	7.09359e+06	1.25255e+07	9.58563e+07	1.07611e+06	130612	2.30093e+07	4.20741e+07	8.72911e+07	2.81679e+06	3.91803e+07	2.60967e+06	1.4702e+07	1.67361e+06	1.22439e+07	5.57158e+07	1.3468e+06	298142	7.96699e+07	2.04211e+06
732a	3.14681e+06	2.62764e+06	1.682e+06	1.79619e+07	2.43283e+07	3.30649e+06	1.18619e+07	1.67706e+06	371477	80523.8	717247	2.15491e+06	590827	6.5506e+06	1.45604e+06	6.61054e+06	1.0229e+07	6.46412e+06	1.92126e+06	1.46659e+06	6.59801e+06	1.68057e+06	2.33822e+06	1.01549e+06	300785	1.53773e+06	1.6138e+06	1.46027e+06	597866	9.14367e+06	8.90213e+06	8.45608e+06	8.3704e+07	1.34223e+06	190504	2.03808e+07	4.4252e+07	7.22747e+07	1.51319e+06	3.02673e+07	2.43949e+06	1.17972e+07	2.16797e+06	1.50452e+07	5.58357e+07	1.71892e+06	438831	5.60348e+07	2.01049e+06
735	2.99313e+06	2.37171e+06	2.63657e+06	1.88324e+07	2.03442e+07	3.03755e+06	1.28193e+07	1.39088e+06	330779	9161.69	664047	1.7215e+06	476893	5.85339e+06	1.36069e+06	5.98797e+06	8.0538e+06	6.05166e+06	2.03313e+06	1.42711e+06	7.93362e+06	2.03313e+06	1.89313e+06	882822	233641	1.32342e+06	1.59448e+06	969119	379744	6.88135e+06	6.96463e+06	2.96138e+06	5.90418e+07	1.04352e+06	126004	2.2093e+06	3.08216e+07	9.77724e+07	1000	3.51586e+07	2.21747e+06	1.53723e+07	1.68874e+06	1.19892e+07	3.80861e+07	964838	366081	7.67023e+07	1.90753e+06
736	3.11547e+06	1.78829e+06	1.92669e+06	1.69463e+07	1.62273e+07	2.86936e+06	9.30883e+06	1.46915e+06	336344	64043.9	878037	1.81851e+06	478253	5.73301e+06	1.58949e+06	4.44452e+06	6.87822e+06	6.00159e+06	1.06105e+06	831617	5.93957e+06	1.52714e+06	1.59802e+06	817429	137949	1.24902e+06	1.44439e+06	1.15529e+06	692629	5.7818e+06	7.29154e+06	3.04776e+06	5.74334e+07	1.0579e+06	93611.4	4.7989e+06	4.69744e+07	9.18263e+07	5.53647e+06	4.78759e+07	2.57208e+06	1.44785e+07	1.21877e+06	9.18794e+06	3.34088e+07	1.15633e+06	300221	6.51497e+07	1.43888e+06
737	2.89864e+06	1.98282e+06	3.07338e+06	1.9703e+07	1.90162e+07	5.48745e+06	1.72873e+07	2.06535e+06	446857	166005	681293	1.48531e+06	428094	6.13595e+06	1.38673e+06	6.16164e+06	6.86232e+06	5.80908e+06	2.58669e+06	1.51047e+06	7.54555e+06	1.96434e+06	1.64364e+06	858882	228580	1.19117e+06	1.1673e+06	1.15683e+06	310425	6.80945e+06	5.87659e+06	3.0768e+06	5.08211e+07	927078	175684	4.85422e+06	4.93338e+07	9.52529e+07	1000	3.49412e+07	1.41125e+06	1.48137e+07	1.88511e+06	1.30079e+07	3.90455e+07	1.54774e+06	459898	8.18956e+07	3.1975e+06
748a	496196	4.8682e+06	6.11128e+06	2.85609e+07	2.48244e+07	1.54858e+06	1.32163e+07	2.55305e+06	690162	98540.4	810597	3.38244e+06	866121	7.87991e+06	1.89747e+06	1.08486e+07	1.31472e+07	8.24186e+06	3.19471e+06	2.60642e+06	1.12308e+07	2.6308e+06	3.02013e+06	1.50238e+06	354399	1.63654e+06	1.7204e+06	1.69855e+06	1.06906e+06	1.14641e+07	1.32361e+07	1.62211e+07	9.60934e+07	1.95033e+06	276662	2.3701e+06	4.73664e+07	9.3962e+07	8.86215e+06	3.27762e+07	4.58034e+06	1.35215e+07	2.68305e+06	2.01126e+07	6.08344e+07	1.63745e+06	204413	5.97696e+07	2.29799e+06
738	2.93824e+06	2.03041e+06	5.46882e+06	2.03906e+07	2.86039e+07	4.86121e+06	1.85609e+07	2.97095e+06	557454	86479.7	477590	1.788e+06	475804	8.45916e+06	1.85168e+06	6.84755e+06	1.07339e+07	6.61835e+06	2.1845e+06	1.61433e+06	9.99904e+06	2.36122e+06	2.42211e+06	1.61566e+06	358168	1.42516e+06	1.40656e+06	1.06805e+06	418061	7.89222e+06	6.51739e+06	1.1672e+07	8.02372e+07	909027	205590	3.47258e+07	4.08557e+07	1.06656e+08	2.00807e+06	4.88216e+07	2.18218e+06	1.52918e+07	1.95326e+06	1.46272e+07	6.10707e+07	1.97698e+06	199439	9.19947e+07	3.19209e+06
755a	2.79225e+06	1.88605e+06	5.08377e+06	2.13661e+07	2.56966e+07	6.42382e+06	2.04151e+07	5.08821e+06	677629	24642	802362	2.20383e+06	586796	1.19911e+07	2.5516e+06	7.21904e+06	9.09153e+06	8.96975e+06	2.7289e+06	1.78106e+06	9.43042e+06	2.27422e+06	2.16422e+06	2.4537e+06	450039	1.1072e+06	778787	823060	554503	6.39165e+06	5.71764e+06	9.6185e+06	6.1884e+07	810410	176829	3.36781e+06	4.73664e+07	1.0855e+08	3.36225e+06	8.79685e+07	1.94427e+06	1.55278e+07	1.98992e+06	1.43778e+07	4.38227e+07	2.29985e+06	105260	1.02809e+08	4.09818e+06
747	3.23884e+06	2.51005e+06	5.32417e+06	1.99028e+07	2.10449e+07	4.62287e+06	1.58341e+07	2.33461e+06	608488	119960	567172	2.2785e+06	599124	8.08871e+06	1.74649e+06	7.4862e+06	8.97301e+06	7.20101e+06	1.82994e+06	1.91138e+06	1.02372e+07	2.48872e+06	2.07217e+06	1.42331e+06	377760	1.22533e+06	1.8435e+06	1.49087e+06	559668	9.84638e+06	8.15876e+06	7.8636e+06	6.42561e+07	1.13651e+06	229715	780117	3.94606e+07	1.01919e+08	3.70896e+06	4.4182e+07	2.16492e+06	1.50558e+07	2.18983e+06	1.64557e+07	4.81937e+07	1.87282e+06	205573	9.1667e+07	3.66704e+06
748	3.31586e+06	2.26553e+06	3.88405e+06	2.12442e+07	3.50001e+07	1.76672e+06	1.40889e+07	3.61213e+06	523954	145202	824714	2.22057e+06	606758	8.46455e+06	1.78374e+06	8.75262e+06	1.56702e+07	8.9582e+06	3.08053e+06	2.12638e+06	9.04265e+06	2.24179e+06	3.7657e+06	1.80755e+06	388789	1.91138e+06	1.39465e+06	1.05234e+06	544918	7.23971e+06	6.54084e+06	1.55926e+07	1.0783e+08	959296	134125	2.3935e+07	4.69013e+07	7.93737e+07	2.02544e+07	3.94457e+07	3.54427e+06	1.12792e+07	1.36767e+06	1.0804e+07	6.59143e+07	1.29541e+06	399451	5.88957e+07	1.37906e+06
756a	3.1512e+06	2.61406e+06	2.77644e+06	2.23417e+07	2.67142e+07	4.52945e+06	1.56159e+07	2.02154e+06	683126	132205	661725	2.24347e+06	603980	7.85183e+06	1.90223e+06	7.74691e+06	1.06242e+07	6.92237e+06	2.33704e+06	1.87691e+06	8.37114e+06	2.05522e+06	2.47383e+06	1.09788e+06	238555	1.43789e+06	1.40815e+06	1.19311e+06	629885	8.80476e+06	8.38854e+06	1.09082e+07	7.8739e+07	1.23562e+06	258495	3.18482e+07	3.93056e+07	9.14043e+07	2.64065e+06	3.71259e+07	2.63703e+06	1.31675e+07	2.348e+06	1.71206e+07	5.77628e+07	1.69002e+06	227837	7.50629e+07	3.26775e+06
757a	3.12642e+06	3.13482e+06	4.98815e+06	2.19759e+07	2.52605e+07	2.23762e+06	2.07423e+07	3.39836e+06	567220	100688	517640	2.50301e+06	655056	6.33993e+06	1.36755e+06	6.79018e+06	9.6243e+06	7.04209e+06	1.69322e+06	1.66986e+06	1.09739e+07	2.65876e+06	2.1812e+06	1.56867e+06	305399	1.27927e+06	1.55871e+06	1.22318e+06	581771	9.40228e+06	8.15912e+06	8.12487e+06	6.61289e+07	1.17054e+06	188571	2.03381e+07	2.89196e+07	1.09498e+08	4.01483e+06	3.92524e+07	2.25694e+06	1.659e+07	1.81479e+06	1.34636e+07	4.37046e+07	986842	151929	8.34742e+07	2.18368e+06
758a	3.13357e+06	2.0764e+06	2.64735e+06	1.78297e+07	1.77014e+07	4.17624e+06	1.03804e+07	1.58983e+06	555917	63302.6	520961	2.12577e+06	556661	7.26202e+06	1.76811e+06	6.63724e+06	7.39535e+06	6.24047e+06	1.72962e+06	1.4749e+06	4.84529e+06	1.22166e+06	1.62305e+06	776818	168641	1.20108e+06	1.49653e+06	1.09002e+06	429792	7.09905e+06	7.02346e+06	4.89176e+06	5.87627e+07	1.05868e+06	196878	2.21365e+07	3.89956e+07	7.28373e+07	429242	3.91557e+07	1.82289e+06	1.11612e+07	2.11865e+06	1.57908e+07	4.89026e+07	1.92928e+06	293532	67088545	3.09525e+06
754	3.48669e+06	1.9036e+06	2.3904e+06	1.66102e+07	2.17717e+07	4.05347e+06	1.52887e+07	2.76802e+06	460012	104222	888089	2.41294e+06	614880	7.63649e+06	1.68986e+06	8.01461e+06	1.19406e+07	8.61763e+06	1.87293e+06	2.06171e+06	1.17446e+07	2.9186e+06	2.76112e+06	1.82947e+06	307805	1.30326e+06	938507	1.03755e+06	418830	6.53825e+06	6.59596e+06	4.14146e+06	6.21337e+07	972568	99904.7	7.71077e+06	2.25639e+07	9.24463e+07	2.45747e+06	4.71784e+07	1.36724e+06	1.44657e+07	1.15478e+06	9.30798e+06	3.5435e+07	794751	183971	7.13488e+07	1.28351e+06
762a	3.63821e+06	1.9039e+06	2.21458e+06	1.51469e+07	2.5842e+07	4.92586e+06	1.74701e+07	3.21401e+06	395658	84862.6	812605	2.6855e+06	702478	7.83695e+06	1.70945e+06	7.06733e+06	1.25988e+07	7.82086e+06	2.71424e+06	1.7589e+06	1.03744e+07	2.4297e+06	2.89651e+06	1.64943e+06	322588	1.32192e+06	1.66665e+06	1.3042e+06	607963	8.07621e+06	6.65427e+06	5.89872e+06	6.33822e+07	932267	131885	1000	3.60503e+07	8.61942e+07	2.7781e+06	4.67918e+07	1.63952e+06	1.31675e+07	1.34299e+06	9.97288e+06	4.08693e+07	1.37543e+06	335406	6.86179e+07	2.08383e+06
761a	3.0472e+06	2.95944e+06	1.53581e+06	2.161e+07	26278070	2.18016e+06	2.0306e+07	3.02781e+06	495001	113775	799330	2.70578e+06	695178	8.81527e+06	1.81667e+06	8.44348e+06	1.18309e+07	8.38997e+06	3.04434e+06	2.06661e+06	1.12308e+07	2.69603e+06	2.6254e+06	1.67443e+06	330501	1.37465e+06	1.41892e+06	1.06668e+06	433163	8.3066e+06	7.17496e+06	8.01382e+06	6.94999e+07	1.06377e+06	156533	1.94481e+06	4.72114e+07	9.90774e+07	2.84087e+06	3.31629e+07	1.80612e+06	1.47017e+07	1.65182e+06	1.27156e+07	5.22104e+07	1.58336e+06	401009	7.71384e+07	2.40015e+06
755	2.93088e+06	2.22672e+06	2.74153e+06	2.03906e+07	2.94761e+07	1.72413e+06	1.4198e+07	2.08833e+06	429276	92430.1	648577	1.70548e+06	469591	6.98166e+06	707615	5.41724e+06	8.3173e+06	6.36194e+06	1.24622e+06	1.18052e+06	6.77537e+06	1.65716e+06	1.94721e+06	1.07147e+06	363551	1.51141e+06	1.60078e+06	1.01602e+06	462107	7.59244e+06	6.83947e+06	8.61192e+06	7.93632e+07	976700	106923	1.24383e+07	2.55092e+07	9.09307e+07	6.08589e+06	3.65459e+07	2.13028e+06	1.41116e+07	1.35354e+06	1.06378e+07	4.68942e+07	821292	100587	7.17858e+07	1.15278e+06
764a	3.14188e+06	2.562e+06	2.28094e+06	1.85614e+07	2.38068e+07	5.18173e+06	1.99788e+07	2.53608e+06	459482	82078.6	509798	2.18271e+06	576190	6.08473e+06	1.2519e+06	6.47681e+06	8.98298e+06	6.08341e+06	1.94122e+06	1.48288e+06	8.49846e+06	2.00165e+06	2.02966e+06	1.10414e+06	274433	1.27665e+06	1.4014e+06	1.23997e+06	465364	8.3368e+06	7.81038e+06	6.34069e+06	6.13846e+07	1.15995e+06	178403	534148	4.28709e+07	1.00025e+08	1.57752e+06	3.71259e+07	2.38348e+06	1.51738e+07	1.65917e+06	1.27156e+07	4.37046e+07	1.49508e+06	406447	7.95416e+07	3.03876e+06
766a	3.15016e+06	2.53379e+06	2.08993e+06	1.66102e+07	1.72653e+07	4.37699e+06	1.50706e+07	2.09485e+06	310952	95234.2	461527	2.42214e+06	613068	5.73209e+06	1.43359e+06	7.03741e+06	9.62741e+06	6.72583e+06	2.25978e+06	1.79421e+06	9.89088e+06	2.50822e+06	2.28095e+06	1.14265e+06	312203	1.0107e+06	876652	972336	226470	5.92232e+06	7.28448e+06	1000	4.3281e+07	1.02829e+06	97872.8	1000	3.41901e+07	7.55845e+07	341779	2.746e+07	1.53392e+06	1.24594e+07	1.06418e+06	8.69888e+06	3.25997e+07	1.28361e+06	425582	6.23913e+07	1.66294e+06
756	2.96422e+06	2.04616e+06	2.28456e+06	1.722e+07	2.07541e+07	4.71635e+06	1.49615e+07	2.16093e+06	293445	97154.3	347737	1.97268e+06	520727	4.31815e+06	1.15157e+06	5.80863e+06	7.79946e+06	5.31799e+06	1.86637e+06	1.4169e+06	5.5794e+06	1.46537e+06	1.82487e+06	757690	235153	1.22064e+06	786965	1.02131e+06	406195	5.41171e+06	6.32432e+06	2.18018e+06	5.43928e+07	950347	95015.4	6189.58	4.20959e+07	7.10374e+07	275349	2.98765e+07	1.5164e+06	1.22233e+07	944845	7.95067e+06	3.48443e+07	1.24519e+06	380734	5.59463e+07	1.40541e+06
770	3.03947e+06	1.72186e+06	1.55541e+06	1.17324e+07	1.23228e+07	3.21846e+06	9.03574e+06	1.67328e+06	274073	115482	801556	2.4912e+06	649175	7.29469e+06	1.67609e+06	6.24405e+06	8.107e+06	6.71522e+06	1.81796e+06	1.14266e+06	9.42916e+06	2.35673e+06	1.9054e+06	1.61857e+06	421802	917169	991340	917714	92098.4	5.12307e+06	5.49479e+06	1000	3.86615e+07	840218	73785.3	1000	1.96186e+07	6.0333e+07	2.64754e+06	33646154	440371	9.98103e+06	909990	7.60706e+06	2.38576e+07	1.04641e+06	390367	4.82997e+07	1.16962e+06
772	2.75818e+06	1.9164e+06	2.37141e+06	1.9293e+07	2.40976e+07	5.11476e+06	1.33254e+07	2.77578e+06	483982	45627.1	1.00912e+06	2.53916e+06	645910	8.79076e+06	2.2e+06	8.55145e+06	1.29278e+07	8.71967e+06	3.01278e+06	2.07294e+06	8.73844e+06	2.19485e+06	2.91802e+06	1.67207e+06	448101	1.40826e+06	1.38737e+06	1.1197e+06	575359	7.48237e+06	7.29572e+06	1.14756e+07	8.07366e+07	1.08151e+06	223520	4.8361e+06	5.13968e+07	8.47732e+07	7.81445e+06	5.10448e+07	2.34851e+06	1.23414e+07	1.88792e+06	1.4461e+07	5.43369e+07	1.80243e+06	232452	6.68701e+07	2.19507e+06
768	3.04388e+06	2.19055e+06	3.21376e+06	1.89272e+07	2.96215e+07	2.83956e+06	1.53978e+07	2.93342e+06	508336	165970	789713	2.28362e+06	574575	7.45346e+06	1.68672e+06	8.11678e+06	1.33666e+07	7.6987e+06	2.6604e+06	2.08752e+06	9.67411e+06	2.35367e+06	3.10765e+06	1.43224e+06	388674	1.48861e+06	1.6684e+06	1.0758e+06	483369	9.28988e+06	6.43094e+06	1.01992e+07	8.4607e+07	972351	176104	2.14172e+07	3.83755e+07	8.55311e+07	1.07174e+07	3.49994e+07	2.24259e+06	1.30495e+07	1.63703e+06	1.26325e+07	5.48094e+07	1.29626e+06	295547	6.15174e+07	1.85027e+06
773	3.56223e+06	2.14569e+06	2.47388e+06	1.7098e+07	2.27893e+07	4.79671e+06	2.13968e+07	2.50507e+06	406152	139270	650182	1.94132e+06	515200	7.92569e+06	1.68817e+06	6.65144e+06	8.30421e+06	6.84375e+06	1.63065e+06	1.6971e+06	1.03984e+07	2.61865e+06	1.79483e+06	1.62355e+06	381036	1.27702e+06	1.40531e+06	1.01275e+06	314608	7.63647e+06	6.25422e+06	5.06238e+06	5.83881e+07	901483	144187	1.14798e+07	2.3494e+07	1.03814e+08	1.07906e+06	3.90591e+07	2.00684e+06	1.58819e+07	1.44098e+06	1.10533e+07	3.96879e+07	997350	227396	9.02469e+07	2.92845e+06
757	3.20054e+06	1.55831e+06	1.92406e+06	1.69761e+07	2.52605e+07	4.58872e+06	1.73611e+07	2.95909e+06	290805	1000	388903	979692	285633	5.40792e+06	1.2931e+06	3.88462e+06	6.03092e+06	5.17568e+06	900552	843430	4.85095e+06	1.25721e+06	1.42607e+06	664236	174302	1.23044e+06	830275	788381	191969	5.72815e+06	4.38429e+06	3.0162e+06	5.46425e+07	620077	76410.4	1000	2.3184e+07	7.9942e+07	1.39732e+06	4.62118e+07	1.12959e+06	1.34035e+07	853720	7.18775e+06	3.11821e+07	621728	290152	7.81215e+07	1.26845e+06
777	2.75081e+06	1.53789e+06	2.59787e+06	1.9293e+07	2.38068e+07	3.89929e+06	1.15802e+07	1.10181e+06	424273	80311.3	1.07249e+06	2.21297e+06	588770	8.92352e+06	2.14338e+06	6.66264e+06	9.04618e+06	8.15636e+06	1.4509e+06	1.04366e+06	7.32445e+06	1.77435e+06	2.14428e+06	676518	197679	1.60597e+06	1.33991e+06	948923	541175	6.41399e+06	5.82221e+06	1.1524e+07	8.59804e+07	845396	150229	26812536	3.80655e+07	9.59513e+07	1.05474e+06	3.54827e+07	2.45384e+06	1.45837e+07	1.56695e+06	1.22169e+07	5.59908e+07	1.39751e+06	171657	8.07433e+07	2.01206e+06
776	2.81974e+06	2.74164e+06	2.96762e+06	1.99028e+07	1.63931e+07	4.57842e+06	1.58341e+07	2.60032e+06	335224	33624	1.19121e+06	3.11371e+06	800084	8.09601e+06	1.86783e+06	1.01046e+07	1.04048e+07	8.89487e+06	2.38602e+06	2.13798e+06	1.16162e+07	2.70394e+06	2.35589e+06	1.39108e+06	314217	1.13455e+06	928198	890888	273053	5.46918e+06	7.06964e+06	1.16954e+06	4.69017e+07	1.06706e+06	97711.3	1000	4.24059e+07	8.07946e+07	2.50419e+06	3.61593e+07	1.43969e+06	1.39936e+07	1.31993e+06	1.03884e+07	3.10639e+07	1.20218e+06	296773	6.16267e+07	1.49871e+06
785	351615	3.60562e+06	1.56279e+06	2.10003e+07	2.33707e+07	5.30543e+06	1.94335e+07	1.90984e+06	563436	118695	1.28338e+06	4.22628e+06	1.08369e+06	1.02832e+07	2.21946e+06	1.28121e+07	1.58896e+07	1.03619e+07	4.36159e+06	2.29051e+06	1.82956e+07	4.23017e+06	3.44579e+06	1.98955e+06	315860	1.40206e+06	1.32164e+06	1.84342e+06	1.19411e+06	1.27536e+07	1.33213e+07	1.96087e+07	9.10993e+07	1.78911e+06	320205	5.13209e+06	4.75214e+07	1.35075e+08	4.85997e+06	3.73192e+07	4.14963e+06	1.82422e+07	2.67343e+06	1.95308e+07	5.5282e+07	2.09502e+06	250927	9.36333e+07	4.16619e+06
758	311505	2.99585e+06	4.04558e+06	2.29514e+07	2.91854e+07	1.98753e+06	1.80155e+07	2.93718e+06	461606	134317	644267	2.59893e+06	658903	5.95641e+06	1.40163e+06	8.29726e+06	1.04048e+07	6.51911e+06	3.1064e+06	1.9452e+06	9.02254e+06	2.31525e+06	2.46051e+06	1.15839e+06	259637	1.45534e+06	1.45956e+06	1.21518e+06	603170	7.83861e+06	8.13831e+06	8.85168e+06	7.72408e+07	1.18109e+06	122500	4.21924e+06	5.4032e+07	7.80474e+07	3.11362e+06	3.04564e+07	2.5341e+06	1.32855e+07	1.40189e+06	10720893	5.17378e+07	1.29633e+06	396464	6.34837e+07	1.78107e+06
780	2.86707e+06	2.78879e+06	2.53226e+06	2.05125e+07	2.07541e+07	4.45807e+06	1.17984e+07	1.99683e+06	462276	74115.5	625240	2.3587e+06	511814	5.96956e+06	1.29982e+06	7.16579e+06	7.56346e+06	6.55158e+06	2.7675e+06	1.81211e+06	8.30956e+06	2.12809e+06	1.95363e+06	1.4675e+06	452809	1.29435e+06	1.31056e+06	1.1289e+06	476381	7.24245e+06	8.61913e+06	5.43244e+06	6.41313e+07	1.28586e+06	133165	2.63177e+06	5.29469e+07	8.36365e+07	5.50853e+06	3.82858e+07	2.46628e+06	1.29315e+07	1.62873e+06	1.25494e+07	4.3232e+07	1.54339e+06	305371	5.92234e+07	1.69109e+06
787	3.00654e+06	1.46089e+06	1.88317e+06	1.55127e+07	2.04634e+07	3.45323e+06	1.08167e+07	1.5414e+06	241179	48432.2	803723	1.61222e+06	462850	6.57499e+06	1.57565e+06	5.57035e+06	8.86953e+06	6.35145e+06	1.349e+06	1.27761e+06	6.7745e+06	1.62187e+06	2.09502e+06	922684	235647	1.28347e+06	1.09249e+06	566185	223691	4.77064e+06	4.79892e+06	3.56203e+06	6.50053e+07	659495	80736.7	6.31577e+06	3.04697e+07	8.31628e+07	1.23563e+06	3.98323e+07	1.52642e+06	1.38756e+07	828192	7.08832e+06	3.37811e+07	744910	345329	6.53407e+07	931555
784	282873	2.82582e+06	3.1426e+06	2.22198e+07	2.91854e+07	2.31795e+06	2.21603e+07	2.39257e+06	544728	129415	933378	3.17237e+06	826305	7.11976e+06	1.78899e+06	9.8681e+06	1.08436e+07	7.82992e+06	2.33905e+06	2.23065e+06	1.11024e+07	2.69393e+06	2.43371e+06	1.49427e+06	368443	1.49972e+06	1.46583e+06	1.31727e+06	719847	9.10012e+06	9.82765e+06	1.17076e+07	8.211e+07	1.42071e+06	210248	613761	4.11658e+07	1.19918e+08	1.45117e+06	3.69326e+07	3.0354e+06	1.71801e+07	1.93612e+06	1.46272e+07	5.24467e+07	1.39205e+06	299581	8.45666e+07	3.01893e+06
759	2.40682e+06	677229	1.65468e+06	2.02686e+07	5.21534e+07	2.27991e+06	4.31607e+06	511979	731150	111541	577979	648327	195357	5.69479e+06	1.28759e+06	3.83418e+06	5.58826e+06	4.86128e+06	728706	888286	3.72817e+06	980663	1.34357e+06	603898	144274	3.24569e+06	1.49112e+06	1.06729e+06	3.84053e+06	9.36442e+06	4.89053e+06	5.62e+07	3.00102e+08	548572	126703	9.08378e+07	3.97706e+07	9.90774e+07	1.3733e+07	5.50078e+07	6.14459e+06	1.25774e+07	1.83562e+06	1.42947e+07	1.23683e+08	1.42531e+06	45174.3	6.34837e+07	2.09687e+06
789	3.01246e+06	1.53385e+06	1.78309e+06	1.4781e+07	1.8719e+07	3.92515e+06	1.20165e+07	1.35667e+06	316619	74586.9	783336	1.886e+06	509797	7.73108e+06	1.83135e+06	5.6108e+06	8.65334e+06	7.20923e+06	1.58068e+06	1.39041e+06	6.98845e+06	1.79379e+06	2.04578e+06	847777	295676	1.23824e+06	965440	864613	360359	5.42071e+06	5.7333e+06	4.30283e+06	6.38816e+07	830266	94352.6	1.00788e+07	3.09348e+07	8.38259e+07	52249.7	3.76092e+07	1.50515e+06	1.37576e+07	1.15538e+06	9.30798e+06	4.19325e+07	1.31624e+06	331756	7.834e+07	1.88042e+06
792	2.96316e+06	2.23694e+06	2.73148e+06	1.9415e+07	2.308e+07	5.37584e+06	1.80155e+07	3.35751e+06	420155	1000	983184	1.72393e+06	465059	9.73046e+06	2.08109e+06	5.60189e+06	6.54088e+06	6.12559e+06	1.33371e+06	918362	5.20284e+06	1.25099e+06	1.49327e+06	1.20985e+06	268633	1.14152e+06	1.19584e+06	1.05506e+06	344413	6.56784e+06	6.59023e+06	4.5301e+06	5.71396e+07	927062	144271	197444	4.16308e+07	8.87519e+07	1.24859e+06	5.36546e+07	1.44339e+06	1.54098e+07	1.84932e+06	1.32974e+07	4.146e+07	1.73989e+06	336977	8.45666e+07	3.06832e+06
794	2.83773e+06	1.85644e+06	2.36775e+06	2.08783e+07	3.20928e+07	4.21444e+06	1.47433e+07	2.64472e+06	471046	60720	1.67307e+06	2.38459e+06	633118	12233430	2.86379e+06	9.47728e+06	1.39151e+07	1.1161e+07	2.22276e+06	2.37124e+06	1.13593e+07	2.75153e+06	3.20661e+06	1.94384e+06	330454	1.60169e+06	1.41726e+06	1.15286e+06	595305	8.29692e+06	6.30829e+06	1.37415e+07	9.78413e+07	905049	152374	2.32156e+07	3.45001e+07	9.66145e+07	1.38881e+07	5.43312e+07	2.21195e+06	1.38756e+07	1.65796e+06	1.27987e+07	5.26829e+07	1.19689e+06	131148	7.20042e+07	1.52094e+06
762	255933	2.59703e+06	3.07722e+06	2.30734e+07	3.07844e+07	2.33685e+06	2.13968e+07	1.27926e+06	566839	1000	1.18029e+06	2.26264e+06	621001	1.03043e+07	2.18735e+06	7.75133e+06	8.93103e+06	8.11321e+06	1.08203e+06	1.87677e+06	9.48811e+06	2.3345e+06	2.0203e+06	717279	163335	1.48479e+06	1.79919e+06	1.17973e+06	990694	8.83274e+06	7.22396e+06	1.27247e+07	8.76035e+07	1.02096e+06	157926	2.53738e+07	2.19439e+07	1.3318e+08	2.02772e+06	3.40328e+07	3.43042e+06	1.95404e+07	1.87814e+06	1.38792e+07	5.23285e+07	915440	1000	1.1701e+08	2.89373e+06
798	3.04474e+06	1.75193e+06	2.38833e+06	1.74639e+07	2.1481e+07	4.33787e+06	1.38708e+07	2.24744e+06	380096	120259	919096	1.76275e+06	479087	6.97709e+06	1.53089e+06	6.08451e+06	8.47031e+06	6.93855e+06	1.46477e+06	1.38864e+06	5.93786e+06	1.45705e+06	1.97899e+06	901657	153968	1.29466e+06	930611	929241	273771	5.7796e+06	5.90464e+06	2.91466e+06	6.02609e+07	861636	92733	1000	3.74454e+07	7.91842e+07	2.83898e+06	4.10889e+07	1.39491e+06	1.30495e+07	1.15214e+06	9.30798e+06	3.59075e+07	1.25648e+06	369309	6.34837e+07	1.30352e+06
799	2.517e+06	2.46867e+06	2.91781e+06	22097807	2.96215e+07	2.68489e+06	2.53234e+07	2.04329e+06	592168	81990.6	996893	2.34156e+06	625035	8.03045e+06	1.91822e+06	8.50704e+06	1.17212e+07	7.03589e+06	2.3524e+06	1.36453e+06	1.25153e+07	3.04483e+06	2.54297e+06	1.15732e+06	238051	1.36744e+06	2.04219e+06	1.38051e+06	797409	1.00887e+07	8.10412e+06	1.256e+07	8.36082e+07	1.20612e+06	240677	3.04095e+07	3.21749e+07	1.2276e+08	680476	3.23896e+07	3.05455e+06	1.72981e+07	2.02344e+06	1.51259e+07	5.1856e+07	1.35076e+06	259519	1.01717e+08	5.40201e+06
795	2.93698e+06	1.11723e+06	1.53196e+06	1.23421e+07	1.42126e+07	3.43227e+06	9.61692e+06	1.76701e+06	295191	76383.5	717399	1.09027e+06	309811	7.10992e+06	1.6512e+06	4.33655e+06	4.9338e+06	5.75932e+06	964020	1.04163e+06	4.53284e+06	1.1375e+06	1.17568e+06	865245	175401	1.05194e+06	1.02287e+06	628263	1000	4.50972e+06	4.01838e+06	1000	4.29065e+07	666148	64589.3	1000	2.58193e+07	7.09427e+07	1000	4.51486e+07	179628	1.15152e+07	883968	7.06248e+06	2.87012e+07	685242	317895	6.45761e+07	1.83846e+06
763	2.8772e+06	2.53823e+06	2.57591e+06	1.90492e+07	1.79922e+07	5.03686e+06	1.45252e+07	2.3259e+06	385946	139336	1.01985e+06	2.93472e+06	779393	8.22569e+06	2.10624e+06	9.5367e+06	1.06242e+07	7.89939e+06	3.89834e+06	2.14833e+06	9.42343e+06	2.32001e+06	2.27772e+06	1.69659e+06	386628	1.11153e+06	1.11771e+06	1.26521e+06	451406	7.49894e+06	8.49125e+06	4.00604e+06	5.63905e+07	1.22556e+06	142446	3.42919e+06	5.77524e+07	9.10254e+07	3.44159e+06	4.12822e+07	1.81813e+06	1.32855e+07	1.83927e+06	1.34636e+07	4.07511e+07	1.89423e+06	445045	7.33151e+07	2.19582e+06
804	3.03468e+06	1.7807e+06	2.82579e+06	1.88053e+07	3.09298e+07	2.83182e+06	2.55415e+07	4.48453e+06	484263	58444.9	1.07237e+06	2.37736e+06	577853	8.84719e+06	1.96273e+06	8.38946e+06	1.3586e+07	7.69255e+06	3.083e+06	1.19934e+06	1.50843e+07	3.61819e+06	3.16463e+06	2.14654e+06	469936	1.47636e+06	1.41276e+06	973975	457067	7.39002e+06	5.83841e+06	6.89622e+06	7.43692e+07	855649	95727.8	1.35977e+07	3.60503e+07	1.07603e+08	4.02399e+06	4.30221e+07	2.17405e+06	1.6472e+07	1.11824e+06	9.07525e+06	4.85482e+07	1.08518e+06	423096	9.00285e+07	1.47077e+06
805	346271	3.40497e+06	2.65135e+06	2.11222e+07	1.88644e+07	4.96627e+06	1.94335e+07	2.3838e+06	473899	102164	475446	2.31999e+06	617440	4.16629e+06	1.1301e+06	7.46051e+06	6.16925e+06	4.73506e+06	1.69493e+06	1.81865e+06	7.98225e+06	1.9719e+06	1.48448e+06	1.12019e+06	275569	1.21275e+06	1.85806e+06	1.47908e+06	686908	8.82663e+06	1.1191e+07	4.80962e+06	5.93869e+07	1.63235e+06	172525	236476	4.3026e+07	1.07603e+08	2.85513e+06	3.54827e+07	2.34417e+06	1.62359e+07	1.97014e+06	1.47103e+07	4.01604e+07	1.30739e+06	417119	7.2332e+07	2.55081e+06
803	3.4957e+06	1.55851e+06	2.88967e+06	1.38055e+07	1.95912e+07	3.88279e+06	1.49615e+07	2.85526e+06	274473	167080	631990	1.55353e+06	435009	5.17952e+06	1.18437e+06	5.01409e+06	7.48939e+06	5.23936e+06	1.38587e+06	674778	7.66532e+06	1.98164e+06	1.78346e+06	1.39121e+06	301267	1.09686e+06	1.09028e+06	925376	197581	4.59788e+06	4.92225e+06	1000	5.03976e+07	722567	62431.2	1000	1.91536e+07	7.4353e+07	1.46222e+06	4.34087e+07	853778	1.18693e+07	690228	6.17257e+06	2.45664e+07	355761	291891	5.72572e+07	1.09208e+06
764	930802	3.47246e+06	4.39599e+06	2.11421e+07	2.12362e+07	4.02849e+06	1.39551e+07	2.94639e+06	486855	97147.8	746863	2.89829e+06	739209	7.35614e+06	1.70597e+06	9.01744e+06	1.02135e+07	7.70929e+06	1.47508e+06	2.14414e+06	9.39229e+06	2.27993e+06	2.37067e+06	1.73896e+06	371816	1.27371e+06	1.10194e+06	1.41281e+06	570268	9.50352e+06	1.07866e+07	6.46174e+06	6.43989e+07	1.55089e+06	163012	1.04134e+07	3.18151e+07	8.62173e+07	1.44856e+07	4.8233e+07	2.30897e+06	1.36802e+07	1.80073e+06	1.34256e+07	4.40425e+07	1.41829e+06	325210	6.81242e+07	2.11172e+06
808	3.61529e+06	2.0696e+06	2.27293e+06	1.63454e+07	1.91781e+07	5.50801e+06	1.80793e+07	2.33491e+06	367153	80704.3	733804	2.49712e+06	634437	7.44458e+06	1.73284e+06	7.5737e+06	9.58208e+06	7.94117e+06	1.87406e+06	1.52261e+06	1.2159e+07	2.94928e+06	2.16553e+06	1.45015e+06	297129	1.04991e+06	1.04653e+06	818538	194549	5.17667e+06	5.71642e+06	3.50187e+06	5.1932e+07	958740	90399.2	2.88375e+06	2.58928e+07	1.04889e+08	1.13435e+06	3.87347e+07	1.30991e+06	1.6247e+07	1.11606e+06	8.83351e+06	3.5774e+07	1.56934e+06	90108.2	8.05408e+07	2.03756e+06
809	3.67521e+06	1.92829e+06	2.5692e+06	1.77844e+07	2.72313e+07	2.12097e+06	1.7226e+07	3.24904e+06	421575	161178	775247	2.06763e+06	552927	7.78407e+06	1.779e+06	7.64913e+06	1.22484e+07	7.24906e+06	1.50598e+06	1.50047e+06	9.6807e+06	2.37332e+06	2.822e+06	1.77026e+06	424889	1.35926e+06	1.204e+06	1.01934e+06	294867	7.05783e+06	5.74431e+06	5.79184e+06	6.8595e+07	970576	141740	6.04271e+06	2.3555e+07	7.85548e+07	4.59201e+06	3.7599e+07	1.57718e+06	1.2568e+07	1.27903e+06	1.03004e+07	4.56198e+07	875916	316085	6.88793e+07	1.55464e+06
810	3.42628e+06	1.81282e+06	2.11966e+06	1.50264e+07	2.13256e+07	4.44293e+06	1.38129e+07	1.80017e+06	322255	134402	462291	1.79049e+06	477381	5.42283e+06	1.18628e+06	5.81561e+06	8.66243e+06	5.61586e+06	3.79225e+06	1.20782e+06	7.02537e+06	1.75666e+06	2.01612e+06	902153	234970	1.21185e+06	1.1078e+06	968837	254441	4.8252e+06	5.52327e+06	3.26346e+06	5.95946e+07	962402	143294	3.99406e+06	3.10358e+07	6.98355e+07	694907	2.59325e+07	1.35846e+06	1.17124e+07	1.04133e+06	8.6604e+06	3.83071e+07	1.53703e+06	368690	5.59593e+07	1.45878e+06
766	905804	3.27383e+06	4.43195e+06	2.19815e+07	2.72313e+07	2.50002e+06	1.86481e+07	2.82942e+06	496107	54441.2	701091	2.59671e+06	692757	6.93054e+06	1.65469e+06	8.24919e+06	1.17812e+07	7.2267e+06	1.55854e+06	2.19e+06	9.41846e+06	2.35985e+06	2.72951e+06	1.1956e+06	298835	1.48139e+06	1.89364e+06	1.27543e+06	647877	8.72308e+06	9.40018e+06	8.11505e+06	7.57103e+07	1.37556e+06	128282	6.67852e+06	3.96076e+07	1.02247e+08	2.64693e+06	2.46936e+07	2.8866e+06	1.51347e+07	1.4468e+06	1.12184e+07	4.72448e+07	813846	301615	7.24029e+07	1.66642e+06
818	3.02854e+06	1.62065e+06	1.80617e+06	1.63454e+07	1.77464e+07	4.21855e+06	1.09027e+07	1.38318e+06	352561	1000	638511	1.68748e+06	457649	7.08863e+06	1.56731e+06	5.65605e+06	6.66367e+06	5.97446e+06	2.91848e+06	1.14759e+06	6.12472e+06	1.537e+06	1.51221e+06	832481	198375	1.16635e+06	1.08061e+06	768587	307095	5.53236e+06	5.36583e+06	5.50371e+06	6.0446e+07	909450	90318.4	8.87766e+06	5.5816e+07	9.20302e+07	1.62476e+06	4.88525e+07	1.77675e+06	1.43647e+07	1.2512e+06	9.80104e+06	4.00756e+07	1.80782e+06	429444	7.57587e+07	1.85341e+06
816	2.8079e+06	2.38517e+06	4.37151e+06	2.18615e+07	3.03631e+07	3.03302e+06	2.1919e+07	3.82364e+06	559050	136432	1.08854e+06	2.38513e+06	609256	9.7303e+06	2.11472e+06	9.32963e+06	1.43509e+07	8.57025e+06	1.89357e+06	2.2475e+06	1.2528e+07	2.94688e+06	3.18167e+06	1.79654e+06	449004	1.47909e+06	1.97484e+06	1.20352e+06	362707	1.01085e+07	6.57497e+06	9.28399e+06	7.86902e+07	1.07394e+06	152484	1.16991e+07	3.5088e+07	1.04889e+08	1.94268e+06	3.85282e+07	1.89123e+06	1.51347e+07	1.63465e+06	1.24561e+07	4.94912e+07	466327	313966	8.23865e+07	2.06354e+06
767	3.41545e+06	1.62774e+06	2.07627e+06	1.58658e+07	2.20415e+07	4.49297e+06	1.44529e+07	1.64574e+06	370701	65831.5	426232	1.6208e+06	438510	5.92472e+06	1.40812e+06	5.59599e+06	8.16233e+06	6.04527e+06	3.30355e+06	1.54284e+06	7.37156e+06	1.87453e+06	1.91957e+06	889176	232583	1.31902e+06	1.35976e+06	999995	356108	6.48509e+06	6.05777e+06	5.85584e+06	6.57368e+07	986854	115830	7.1074e+06	2.90098e+07	9.13256e+07	1.05388e+06	3.06817e+07	1.92645e+06	1.4108e+07	1.24512e+06	9.94635e+06	4.19874e+07	1.4041e+06	340972	7.61782e+07	1.67462e+06
819	911259	3.26592e+06	4.21892e+06	2.33005e+07	2.35626e+07	3.19256e+06	2.34122e+07	3.40182e+06	635375	137205	1.0861e+06	3.05976e+06	775384	9.72397e+06	2.21285e+06	1.05133e+07	1.08468e+07	9.36332e+06	1.81568e+06	2.69594e+06	1.26018e+07	3.0589e+06	2.52142e+06	1.84686e+06	410996	1.20112e+06	1.10708e+06	1.3576e+06	596042	1.00638e+07	9.93935e+06	8.48495e+06	6.31826e+07	622412	312461	7.00715e+06	4.30363e+07	1.26908e+08	2.94977e+06	4.70973e+07	2.50513e+06	1.76159e+07	2.7177e+06	1.96776e+07	4.70058e+07	2.05522e+06	383178	1.03612e+08	5.26721e+06
821	2.77069e+06	2.61464e+06	4.33795e+06	2.21014e+07	2.73208e+07	2.96094e+06	2.14923e+07	3.51442e+06	561463	90179.9	1.05937e+06	2.77005e+06	717361	9.79228e+06	2.16185e+06	8.82633e+06	1.29493e+07	9.01761e+06	1.88157e+06	2.27919e+06	1.28231e+07	3.09208e+06	2.9832e+06	1.85953e+06	360672	1.28643e+06	1.49761e+06	1.42682e+06	570752	8.9943e+06	7.43597e+06	8.09847e+06	6.76828e+07	613496	148201	1.28764e+07	3.5088e+07	1.13696e+08	2.46022e+06	5.28789e+07	1.93129e+06	1.64181e+07	1.91183e+06	1.4142e+07	4.79617e+07	1.38443e+06	327505	9.88301e+07	2.96949e+06
823	1.82008e+06	717066	1.43347e+06	2.48594e+07	4.64695e+07	1.82491e+06	7.84432e+06	1.11533e+06	738943	121230	993912	798721	220599	7.56591e+06	2.01067e+06	4.23635e+06	5.91465e+06	6.26108e+06	1.61774e+06	1.40493e+06	3.65847e+06	947161	1.37404e+06	722655	167245	2.62755e+06	904933	635940	2.63573e+06	7.18152e+06	3.87324e+06	4.26826e+07	2.20022e+08	633894	278184	8.02895e+07	5.16081e+07	7.17731e+07	1.34131e+07	6.13449e+07	5.88963e+06	1.0279e+07	2.44399e+06	1.87008e+07	1.0522e+08	1.49627e+06	22884.9	5.31068e+07	2.25938e+06
822	3.21342e+06	2.71546e+06	1.83491e+06	1.70649e+07	1.81044e+07	3.65056e+06	1.1045e+07	1.54924e+06	379789	106008	442041	1.8978e+06	513072	4.89724e+06	827936	5.39136e+06	5.82432e+06	5.0464e+06	2.54743e+06	1.15925e+06	5.58702e+06	1.40435e+06	1.38979e+06	837530	213289	1.2118e+06	1.67177e+06	1.41605e+06	514574	7.51768e+06	9.63126e+06	5.01106e+06	6.02027e+07	1.46328e+06	119182	4.53924e+06	3.32178e+07	7.15089e+07	1.8809e+06	3.87347e+07	2.03592e+06	1.1798e+07	1.40194e+06	1.07598e+07	3.90719e+07	1.19442e+06	170306	5.80567e+07	2.14006e+06
279	3.04625e+06	2.0086e+06	1.82317e+06	1.5506e+07	2.07888e+07	4.35061e+06	1.38129e+07	1.86752e+06	310204	50720.8	551375	2.0315e+06	542665	6.03402e+06	1.42849e+06	5.74699e+06	8.28921e+06	5.92595e+06	3.55949e+06	1.21759e+06	7.46256e+06	1.85385e+06	1.8987e+06	1.07129e+06	267845	1.32575e+06	1.18217e+06	1.04626e+06	486441	5.33075e+06	6.44407e+06	5.37124e+06	6.68314e+07	1.04203e+06	141062	4.66009e+06	3.10358e+07	8.42796e+07	1.96533e+06	3.54309e+07	1.81351e+06	1.3338e+07	1.12526e+06	9.17865e+06	4.01711e+07	1.23781e+06	335014	6.44328e+07	1.44657e+06
[truncated: 92 more columns]

## Sheet: cord plasma, negative mode
samples	Cer-NDS(d18:0/24:0)+HCO2	Cer-NS(d18:1/22:0)+HCO2	Cer-NS(d18:1/24:0)+HCO2	Cer-NS(d18:1/24:1)+HCO2	CL(16:1_16:1_22:6_22:6)-2H	CL(18:0_18:0_20:4_22:6)-2H	CL(18:0_18:0_20:4_22:6)-2H	CL(18:2_18:2_22:6_22:6)-2H	DMPE(18:2_20:4)-H	DMPE(18:2_22:6)-H	DMPE(20:2_22:4)-H	LPC(14:0)+HCO2	LPC(16:0)+HCO2	LPC(16:1)+HCO2	LPC(18:0)+HCO2	LPC(18:1)+HCO2	LPC(18:2)+HCO2	LPC(20:2)+HCO2	LPC(20:3)+HCO2	LPC(20:4)+HCO2	LPC(20:5)+HCO2	LPC(22:6)+HCO2	LPE(16:0)-H	LPE(18:2)-H	LPE(20:4)-H	LPE(22:6)-H	MGDG(18:0_18:0)+HCO2	MGDG(18:1_22:6)+HCO2	MGDG(18:2_18:2)+HCO2	MGDG(18:2_22:6)+HCO2	MGDG(22:6_22:6)+HCO2	OxCL(18:1_18:2_20:4(OOH)2_22:5)-2H	OxCL(18:1_18:3(OOH)2_18:3(OOH)2_20:3)-2H	OxCL(18:2_20:4(OOH)2_18:2_22:5)-2H	OxCL(18:2_20:4_20:4_20:4(OOH)2)-2H	OxCL(18:3(OOH)2_18:3(OOH)2_20:4(OOH)2_22:6)-2H	OxCL(18:3(OOH)2_22:6_20:4_22:6)-2H	OxLPC(14:0(CHO))+HCO2	OxLPC(16:1(COOH))+HCO2	OxLPC(16:1(OH))+HCO2	OxLPC(16:1(OO))+HCO2	OxLPC(18:3(Ke,OH))+HCO2	OxLPE(16:1(CHO))-H	OxPC(16:0_18:2(OOO))+HCO2	OxPC(16:0_20:3(1O))+HCO2	OxPC(16:1_16:1(COOH))+HCO2	OxPC(18:0_18:3(OH))+HCO2	OxPC(18:0_20:3(1O))+HCO2	OxPC(18:0_20:5(Ke,OH))+HCO2
549	167119	54811.2	61515.5	106782	25470.2	64797.9	378997	42544.7	209181	221418	1000	105090	7.05829e+06	464333	1.71656e+06	1.34146e+06	943491	92966.7	335939	1.95883e+06	17800.8	193353	78405.6	140826	485307	426916	43446.3	392045	39222.4	1.186e+06	682451	159298	22777.2	249814	102754	1.20067e+06	389102	17135.5	51747.1	34639	24580	17294.6	15963.6	1000	482124	20057.9	399346	2.99554e+06	42685
548	106904	50293	53212.6	106882	18667	68550.9	223541	24346	175812	81011.9	1000	130372	7.37086e+06	613043	1.41905e+06	2.00583e+06	1.65813e+06	13300.2	1000	1.79442e+06	35239.9	305279	1000	169392	461870	416094	78762.9	501031	71716.1	1.3242e+06	647333	158437	32815.2	379131	30981.5	1.1803e+06	445794	27636.3	77455.9	21175.2	17242.7	50306.2	44157.2	440692	449263	368915	441723	3.96662e+06	151400
2	156113	56613.9	89885.5	54351.3	32795.1	67703.3	257594	22665.7	174020	80230	346952	143175	8.69434e+06	609290	1.80846e+06	2.23036e+06	2.30872e+06	40677.9	706100	2.54193e+06	14808.6	354386	119863	236257	695123	755767	15751.7	576336	69431.4	1.50943e+06	569330	12175.7	30435.2	458551	116702	1.1706e+06	467102	25854.5	89439.5	17934.6	84225.8	104752	10345.7	669590	290340	21331	424541	4.17316e+06	138386
550	169825	65661.3	74616.7	151728	44122.3	47439.6	22665	51703	289314	245415	472139	6312.18	1.13077e+07	699098	2.76463e+06	2.49438e+06	3.05744e+06	22481.4	612801	3.09014e+06	50254.9	374115	147507	272578	625652	660640	22533.7	490351	39033.5	1.59336e+06	696114	210858	54156.2	20467.6	168019	1.60002e+06	669917	21163	100208	53199.7	2159	119914	11970.2	1000	349538	271850	521265	4.17294e+06	137862
551	143282	60986.6	85845.7	149651	37391.5	53733.7	79685.7	32422.7	218223	143858	547432	111481	9.87561e+06	550894	1.99428e+06	2.40058e+06	3.52458e+06	21999.9	788265	3.98058e+06	29918.6	397607	1000	326325	870741	831162	21692.2	374827	27097.7	1.52226e+06	570621	196539	51689	28479	118916	1305997	617469	62838.9	100333	89244.4	55092.1	16350.5	49330.1	58168.6	481148	230137	405246	3.40904e+06	168901
556	146943	57275.7	66622.1	124985	38566.9	39344.9	96684.2	49061.2	342136	163989	319022	155255	1.02521e+07	725140	2.04038e+06	2.53734e+06	1.97713e+06	24172.7	524746	2.41215e+06	72851	358137	158550	169762	486220	517128	24333.3	587924	37224.2	1.48156e+06	710020	207459	68377.3	463367	195194	1.64939e+06	664727	59336.6	102110	14687.7	107962	113483	16124.3	1000	336338	391624	711060	5.98335e+06	127850
43	164920	181675	585992	274148	96428.7	946531	1.0834e+06	84238.3	513921	302001	326673	9365.49	6.31978e+06	157720	1.8027e+06	1.15456e+06	1.27315e+06	84063.1	35414.1	488854	26782.1	135202	8575.65	280587	224438	228827	175848	418782	15680.2	3.26144e+06	229254	440309	145430	33625.1	53514.8	771192	744775	25271.4	44345.3	44855	35033.4	85207	31636.9	4.05165e+06	162416	194948	596231	3.02119e+06	80340.8
555	156657	44187.2	174451	100044	34503.2	47339.8	265202	22439.5	333045	288740	269738	98520.4	6.10875e+06	381295	1.41858e+06	1.41836e+06	979829	86607	394154	1.98029e+06	43313.9	309864	1000	80105.7	312677	455520	49753.1	292557	15185.3	1.23755e+06	657402	167606	23009.8	21045.4	168030	1.22808e+06	465382	28015.9	57382.2	14849.1	67522.8	83987.2	57266.5	1000	398939	334908	350697	3.03976e+06	1307.27
562	145603	62909.7	248162	131974	43094.1	79851.5	247362	42840.1	246987	391227	461759	171091	9.93856e+06	588049	2.18147e+06	2.61649e+06	3.15823e+06	18693.8	831101	3.74188e+06	100660	598499	165857	192746	666354	928190	13277.7	402136	31736.4	1.53806e+06	506187	206989	39087.1	20730.7	147967	1.20147e+06	577883	13105.4	102813	10403.3	52672.4	75346.2	18923.5	1.83072e+06	720056	390990	407122	4.09108e+06	149349
331	85671.2	48734.8	51094	104890	41475.1	40458.2	277360	37059.3	319926	289272	561828	140376	7.49658e+06	519598	1.50184e+06	1.98684e+06	1.45352e+06	21059.2	510823	2.54444e+06	36691.6	289223	130150	141913	447494	522850	25440.9	245279	15589.6	1.25913e+06	603269	165462	24535	374236	174521	1.22773e+06	488598	17115.2	81194.4	22019.5	52481.6	49268.7	24426.3	487791	309945	1000	390091	3.75633e+06	154424
564	103411	49892.3	49647.1	108378	35190.3	68450.9	338466	49352.7	298749	132737	340360	130123	8.00608e+06	557616	1.81455e+06	1.68568e+06	1.9249e+06	105537	1000	2.1098e+06	33829.2	256522	123721	203899	493081	446285	33962	278787	11398	1.54524e+06	594030	207024	53748.1	24724.2	160431	1.22336e+06	498586	63390	68358.3	14837.2	9153.44	11974.5	34643.5	1000	258868	8935.93	408923	3.26088e+06	13179.5
566	111010	48341.1	53478.8	103795	31751.7	46615.6	16131.4	36946.1	219089	107047	338525	71909.2	4.83727e+06	96361.1	737755	1.19038e+06	280674	64158.7	202706	1.4082e+06	32373.9	148657	1000	82527.6	346021	277360	13165.9	408987	12000.7	1.42277e+06	625142	193728	45510.6	25122.7	123627	1.17237e+06	491279	11809.8	44727	18485.4	24594.4	59561.7	44137.7	236968	542764	382472	412218	3.48621e+06	8374.34
567	109654	46558.6	51623.2	103214	21088.3	49930.9	249955	39143.8	310797	120855	1000	91939.9	7.50464e+06	455068	1.54234e+06	1.59469e+06	1.20613e+06	93510.3	372817	2.19736e+06	18100.6	285753	31997.4	177404	504442	623463	23110.5	220847	57261.4	1.31853e+06	595569	172175	22357.9	28123.4	162801	1.05881e+06	257882	20132.6	61154.4	34550.9	21695.7	10356.8	51026.5	6262.88	497485	358918	331970	3.19045e+06	28211.7
332	197461	235162	741820	444473	144484	45108.6	620457	86441.4	561618	392659	286562	43198.6	9.13043e+06	191869	1.79483e+06	1.37212e+06	1.04171e+06	112315	58921.6	402748	21920.5	184069	1000	242003	217854	266485	225674	658830	23879.6	3.27842e+06	108646	465099	104740	38385.3	57620.4	915682	904036	31230.9	53385.7	54365.4	32429.2	17153.2	36977	4.93272e+06	77172.1	267336	66288.7	6.74787e+06	33968.6
333	170717	48092.9	92525.5	120324	28910.6	65012.1	277476	21942.9	212149	223455	430475	102439	8.61901e+06	576799	1.7376e+06	2.18558e+06	2.02546e+06	111115	455822	2.58785e+06	27137.6	246194	104045	255683	667708	515155	108386	587731	66623.8	1.42543e+06	551178	195094	34322.2	444898	118953	833531	417190	28796	86996.4	9284.22	44055.1	15698.3	52075.8	1000	439482	14860.6	395725	4.70613e+06	7898.53
573	134312	51367.5	54038.2	116174	51387.6	85231.8	95936.1	25942.4	238578	270554	614267	96796.2	8.07962e+06	514095	1.98359e+06	2.20022e+06	2.41514e+06	15674.4	659742	3.10962e+06	70892.1	403831	102256	205668	701290	750169	15736.4	436009	21805.3	1.64901e+06	394866	216337	49867.7	537187	139766	1.13824e+06	723059	20269.6	87791.9	8584.8	61541.7	40634	20990.9	1.78242e+06	705350	421897	394174	3.32228e+06	146127
569	321574	66578.3	201461	190835	36667.8	91478.6	73834.8	33684.1	200208	219153	530711	187739	1.37355e+07	915741	3.33321e+06	3.41998e+06	3.26395e+06	5147.02	794824	3.03481e+06	26198	377531	193829	336854	786815	571624	9895.69	420541	22968.2	1.6408e+06	1.06806e+06	234598	53522.3	24918.2	134430	2.25666e+06	330363	163595	137964	13059.5	131001	119224	11532	1.29312e+06	262449	369340	536477	4.89719e+06	157718
574	189582	82696	71527.7	155340	47699.1	42538.2	1000	47971.5	640891	446020	273838	126335	8.64445e+06	510666	1.71976e+06	1.90578e+06	1.97816e+06	6280.39	552964	1.99242e+06	153730	386743	127447	180737	451993	607171	70987	524099	20003.5	2.42753e+06	496660	225741	77265.2	891218	333419	842925	538407	41636.5	77310.4	5151.04	3013.61	56848.8	16788.5	1000	55314.9	289892	368188	4.48603e+06	92914.5
343	237782	240885	959977	405807	150674	42424.4	597742	86668.4	464073	342574	280779	68109.6	5.80412e+06	123389	1.09181e+06	1.0536e+06	636468	74084.1	39058.2	335627	28420.1	91964.1	1000	343303	184317	209201	228390	888360	18924.1	3.49668e+06	39824.4	462619	185418	40981.6	58956.6	710913	827672	13752.2	14720.1	19748.3	27931.5	49328.1	26469.2	4.01927e+06	342627	218265	151397	7.93396e+06	30578.1
575	122686	51611.6	162679	100343	32794.8	58928.4	330920	42390.4	338116	121098	432696	85975.1	6.57721e+06	393092	1.53546e+06	1.4046e+06	685127	83030.4	341111	2.26721e+06	14293.7	262836	91515	80482.5	394664	443822	20799.5	310711	37522.2	1.15479e+06	955006	166331	51571	377838	185296	1.65408e+06	539823	14603.6	52330.7	29819.7	6475.85	9627.9	20641	1000	666797	28359.1	403319	2.37243e+06	31406.4
348	169193	57845	72961.2	131076	34019.2	48629	314828	19414.2	384669	267489	351749	92788.6	7.66527e+06	381385	1.83149e+06	1.4415e+06	1.39624e+06	95737	374424	1903597	31653.4	259775	88003.5	133041	438670	505656	44332.9	205325	77088.2	1.35826e+06	684964	192255	30874.5	445231	180367	1.24181e+06	483443	24781.1	53371.7	19655.6	18255.9	35685.1	36638	1000	498250	316126	354318	3.1076e+06	26580.2
576	144547	53284.7	62392.9	112871	31534.6	45206.2	287287	39514.3	432456	226877	422045	102600	1.03576e+07	548287	2.50428e+06	1.94032e+06	1.95544e+06	13866.8	1000	1.73472e+06	6629.56	344037	151159	215371	481184	694299	74409	561219	76824.3	1.44677e+06	671001	203390	25594.8	50020.5	215351	1.20002e+06	392408	17134.4	79738.3	56262.5	62022.3	66327.6	9389.37	1000	257530	1000	334738	4.08787e+06	50159.3
581	167894	48822.9	205896	108647	44524.2	41535.1	115115	18953.4	334675	311078	423699	112920	7.79636e+06	501469	1.73055e+06	1.88219e+06	2.06122e+06	35316.5	595425	2.02472e+06	40098.1	357371	111894	200979	485365	673507	18461	264727	83730.8	1.41939e+06	539773	200462	21904.8	28543.9	171845	1.12934e+06	510631	15159	75026.8	28129.3	12638.7	41321.1	6384.94	666172	485511	26107.7	327799	3.42105e+06	6916.81
350	178689	69058	71506	120773	30277	69539.9	59072.6	31480.5	192467	240815	468429	95277.3	7.42906e+06	480475	1.59664e+06	1.73126e+06	1.44753e+06	34641.5	655625	1.98148e+06	20673.7	278301	31431	192799	544176	523207	1000	296804	67306.2	1.31368e+06	571462	189513	25879.8	427416	129462	1.11861e+06	434691	37296.8	67559.5	19350.4	42290.1	76556.4	28677.3	1000	365646	393996	396833	3.03357e+06	1000
578	106933	55501.7	49929.1	114834	46458.1	89760.3	111291	49136.4	378267	147579	498338	123925	8.7974e+06	516668	2.30634e+06	2.31069e+06	2.95566e+06	5856.49	864796	2.69249e+06	123413	669147	1000	186744	510004	959735	21110.9	355748	90826.1	1.46859e+06	654908	199592	29540.2	25150.6	209715	1.48026e+06	705507	38171.4	90197.9	15123.7	13572.2	15823.9	16637	2.58931e+06	630878	349508	379534	3.14262e+06	156990
583	137245	55651.6	64821.6	118541	35197.3	75591.6	95836.9	38822.7	231498	149663	291977	129142	7.88751e+06	637523	1.50741e+06	2.33432e+06	2.21999e+06	4951.58	593318	2.75902e+06	22645.3	305790	1000	235781	710595	572574	21316.6	320811	23515	1.27986e+06	751443	183090	42059.9	417382	23658	1.45042e+06	560838	15927.4	89040.3	8731.6	80907.2	18034	62214.4	196197	411180	33302.6	431954	4.0924e+06	4631.09
349	237626	67544.7	119749	151445	33330	83754.8	83508.7	46523.4	313845	113919	626809	125070	7.53239e+06	524682	1.51621e+06	2.05386e+06	1.27947e+06	97623.2	385952	2.62948e+06	34949.1	326702	1000	161127	657484	635790	45598.5	389692	18379.5	1.30245e+06	694129	188175	50020.6	20199.8	137484	1.5091e+06	558325	21355.2	81411.3	27365.7	36840.1	16690.5	9109.1	1000	654290	435282	522180	4.91677e+06	5766.78
585	234645	53929.7	245077	120331	52810.7	75281.2	192809	42745.7	450513	421653	646941	122719	8.20685e+06	500356	2.03085e+06	1.67779e+06	1.17167e+06	98863.1	329261	2.00676e+06	34973.1	336244	106368	96733.3	321645	468324	14970	304337	9933.04	1.35779e+06	809392	199545	55707.6	21161.3	220407	1.54896e+06	660609	40736.4	62812.7	17746.4	108051	24157.2	18255.3	1.67581e+06	586318	10632.1	408595	3.35324e+06	56821.8
579	116264	51820.3	185203	114143	47777.9	78365.5	103840	22978.3	382921	242766	533078	102085	1.06743e+07	792060	2.24347e+06	2.87486e+06	3.37334e+06	20023.9	802830	2.47399e+06	57100.2	416707	156440	303390	553271	690019	35154.5	498353	80424.4	1.87842e+06	551302	269323	33719.9	655014	204244	931753	650950	21619.3	116039	11045.8	64375.6	11479.1	17443	1000	293305	442971	542698	5.16025e+06	13855.9
587	218039	65168.3	87136.5	147217	44029.5	73672	386837	38514.4	517468	303793	332842	171088	1.01465e+07	701451	2.01159e+06	2.27467e+06	1.77589e+06	6336.43	678087	2.62252e+06	15322.9	445245	214560	140594	459868	624207	51815.6	666799	78207.1	1.09262e+06	971539	160788	30905	334656	252721	1.6836e+06	485018	25756.3	89802.3	18298.5	13830.1	145684	40491.6	1000	355908	351600	438496	4.27792e+06	32121
477	200794	69074.4	247025	140027	42194.8	65457.5	91860.3	21425.1	500042	212869	1000	145846	1.06743e+07	620935	2.35665e+06	2.31419e+06	2.41055e+06	43112.4	776723	2.59811e+06	105274	468089	185737	197203	501267	864123	53852.5	478824	84895.1	1.42865e+06	939262	116194	54156.3	18997.9	257123	1.80155e+06	625489	24671.2	89576.3	13951.2	1329.11	138649	25686.5	1.9187e+06	498439	404495	202867	4.64831e+06	54385.8
586	135143	52351.8	72371.7	131960	30170.5	50488.8	232032	41462.9	217642	277972	3419.5	127387	9.71218e+06	714521	1.51419e+06	2.7719e+06	4.91239e+06	20415.8	1.0578e+06	2.91896e+06	6339.88	416178	141590	301538	537098	520727	10061	520683	66063.7	1.64265e+06	514206	229664	42299.5	32191.2	134618	516852	495856	18341.4	111818	5887.87	71756.8	105076	29128	1000	410502	466881	337244	3.41472e+06	22875.1
355	151122	56631.2	70253.7	126813	42930.4	45810.4	99414.1	47704.4	189724	163481	290312	38983.7	8.23835e+06	498000	2.21383e+06	2.16244e+06	2.4477e+06	104406	417745	2.52237e+06	5497.91	218752	90560.3	237917	608429	416067	2274.49	378138	73107.2	1.61869e+06	592054	235754	44889.6	21487.8	97553.3	1.27931e+06	612413	90816.7	83958.5	17669.6	12881.7	52346.8	52332.1	172339	285628	4910.4	377318	3.94931e+06	27423.9
588	213440	97367	85190.2	190675	37495.1	93818.2	104431	31603.8	348200	452376	711480	129737	1.12021e+07	467405	3.02992e+06	2.05422e+06	2.45374e+06	11156	513365	2.62621e+06	24891.8	382134	147336	260195	568842	763310	153997	376609	26406.7	1.54536e+06	527215	231868	55027.9	587259	448320	1.30997e+06	696900	14239.2	79825.9	19337.2	23252.1	137856	16175.9	1.79986e+06	346794	374009	224158	3.49297e+06	25647.9
590	210578	78089.8	71770.1	141521	32669.6	42004.7	365914	43602	791674	339223	516276	149081	1.01465e+07	718439	2.3948e+06	2.29127e+06	1.59511e+06	15607.9	543846	2.49031e+06	135653	536256	156328	133460	515984	804488	106896	512044	83278.8	1.01603e+06	980937	167020	48836.4	30248.7	262269	1.66961e+06	479188	20463.6	90727.8	10495.1	80748	63844.3	89382.4	1.20274e+06	430563	471528	506504	4.54183e+06	1000
596	135419	43893	76546.5	117910	29112.9	58610.1	78898.3	20934.5	235919	282790	355327	91452	6.26476e+06	429222	951842	1.58758e+06	1.7877e+06	80163.1	459677	1.82507e+06	60462.1	301898	115753	217841	583500	696854	18206.6	281800	11590.3	1.47311e+06	542173	206567	36880.8	487152	141013	1.03657e+06	469009	42806.2	58808	76019.3	3626.96	25500.9	58877.5	1000	484955	438315	352782	3.38522e+06	17962.3
486	150875	56334.1	213294	123857	39567.3	40105.7	125471	21500.5	338504	385354	558323	89173.3	7.95838e+06	482376	1.74258e+06	2.21176e+06	1.4694e+06	3876.66	612061	2.41809e+06	30514.4	372865	30311.1	171816	603022	630768	13891.9	535709	28172	1.33027e+06	636318	188721	39603.9	21579.4	179372	1.31621e+06	636911	18269.9	85545.6	38820	29918.9	27316.7	21797.9	830713	428333	418973	393523	4.38601e+06	26073.4
593	204458	68622.6	249577	128907	43665.9	86516.5	118425	36179.1	613497	451330	507101	123347	1.0991e+07	522813	2.95458e+06	2.35486e+06	3.20519e+06	40059.2	638324	3.72278e+06	5747.9	649296	168173	170690	516691	936834	69422.8	314928	42237.2	1.4463e+06	708985	201323	45269.7	530575	313263	1.56627e+06	691713	23824.8	91981.7	16252.1	87657.5	17061.7	19251.8	2.56752e+06	784577	411194	333637	2.96316e+06	30355.6
516	79564.9	36490	38654.6	80659.4	27175.3	43523.2	40057.9	44296.8	173797	209598	359175	91274.7	6.4483e+06	511247	1.27575e+06	1.84371e+06	961245	14645.5	522523	2.33188e+06	26222.1	262614	101541	128235	569083	387271	31998.1	257298	65203.8	1.03791e+06	823298	66423.4	43764.2	23267.5	112134	1.2615e+06	417567	17471.3	65394.4	16322.1	20985.7	72110.9	56648.1	1000	246232	18919.2	343220	2.32803e+06	13005.1
598	187451	56261.7	120343	147922	31815.9	58442.2	71944.1	49075.2	237437	293559	317224	138246	1.0991e+07	802017	2.46794e+06	3.39984e+06	3.93099e+06	59605	1.06323e+06	4.13362e+06	78414.4	471584	1000	299091	1.04897e+06	816421	74722	334091	17778.2	1.42699e+06	797416	210157	30363.6	475992	126165	834647	485398	48197.6	131582	3415.85	18728.3	11748	28952.4	58832.2	299052	569167	498321	4.73083e+06	25847.6
599	93368	35895.2	89989.4	138856	18362.3	1000	343613	47793.6	89130.4	196606	548209	95389.2	7.03345e+06	586012	709107	2.55426e+06	3.22847e+06	21967.4	689936	2.96116e+06	22450.4	206102	21549.8	199542	531323	383686	80841.8	269632	52535.9	1.28411e+06	506330	93097.3	53653.2	432261	26811.7	1.02104e+06	485243	36418.8	97408.3	11357.6	14151.6	76571.7	37337	1000	352946	64085.1	435229	4.57571e+06	134503
542	143078	13717.6	98554.9	95156.9	16712.9	110267	394438	45703.4	227348	203412	1000	103729	6.1035e+06	416704	697977	1.50488e+06	1.19766e+06	76873.3	239701	1.93365e+06	45386.8	236439	33087	161652	358605	406027	70338.8	298923	74974	1.57598e+06	441673	199977	3863.7	22520.2	108420	678066	382914	12064.2	54429.5	16693.4	8176.69	10219.8	28730.6	111121	30901.2	378642	392005	3.00947e+06	152445
601	188409	67402.4	155636	169837	76571.5	166711	502071	51830.8	141914	307418	533915	123584	8.31091e+06	584748	2.08823e+06	2.03761e+06	1.19131e+06	13935	388895	2.17092e+06	21923.7	265555	51370.2	110798	529203	465470	80939.8	396812	31284.6	1.49544e+06	652507	220840	27790.8	27549.8	118890	1.45834e+06	507828	51223.9	73469.6	62475.2	72815.8	1000	33644.8	79976.8	347141	267261	392072	3.91632e+06	154715
603	96072.9	8233.36	21930.5	97340.2	29397.6	1000	65026.5	21892.8	315009	315514	355379	128989	8.42065e+06	483734	2.01989e+06	1.39433e+06	1.18791e+06	102423	197971	1.56562e+06	96848.6	248213	42366.9	189740	356253	412738	82318	247994	72644.2	1.75961e+06	561995	174587	57329.5	23065.8	155461	865722	496536	22211.2	45617.7	25669.2	1000	99148.7	29694	233365	493078	233490	342484	2.74192e+06	11321.1
543	127987	40503.3	30259.4	89613.3	37373.3	146188	1000	49839.1	250393	151261	266760	135749	1.13726e+07	764013	2.32056e+06	2.84405e+06	1.2052e+06	29311.2	1.20215e+06	3.97747e+06	55412.9	578598	71708.4	285414	791287	825238	1000	295242	65040.8	1.53275e+06	527826	200131	16557.1	489900	120450	1.13204e+06	576966	23762.8	101409	25491.6	28821.2	1000	26076.4	1000	252415	333391	331714	2.86886e+06	15411.3
613	256441	154810	902431	261427	96009.9	284437	218200	63592.4	538184	291544	577681	109859	9.52173e+06	360871	2.42852e+06	1.63485e+06	1.18898e+06	13658.9	613222	2.68236e+06	16089.7	387227	64518	186580	432740	691953	170796	319519	61501.2	1.90247e+06	623630	247340	102297	597413	253276	1.71543e+06	882646	68285.2	59714.6	55076.4	64536	49212.6	113235	630545	724898	258153	822582	3.70964e+06	16520.1
610	191217	62718	123057	185147	70837.3	214451	84295.2	27305.1	255569	185599	561362	136100	9.90296e+06	651280	2251296	2.5654e+06	3.81016e+06	26353.5	912661	2.75033e+06	35799.8	371152	73254.5	345767	739658	717576	88346.3	570579	17601.6	2.44423e+06	332976	320064	82348.6	16967.9	134166	797324	646425	5370.95	101604	13328.5	60814.6	51522.6	13117.1	241495	296699	311197	417634	5.05516e+06	129255
615	147304	37416.5	30621.6	1000	7930.49	98127.7	131822	29654	230345	122791	355431	54892.2	5.68665e+06	193244	713742	903237	2.17816e+06	70008.7	266184	1.38385e+06	21532.1	197607	1000	149166	344698	403709	235540	221508	53518.3	1.3885e+06	457262	110820	43819.1	44781.3	133890	931123	281368	10648.1	26971.7	18981.6	7476.62	51847.3	29514.1	681753	364054	334112	267716	1.65187e+06	38967.7
570	215444	63306.5	140471	178198	48397.4	252615	1000	28142.7	240061	206628	468778	118507	8.34324e+06	592649	2.03647e+06	2.3116e+06	2.99842e+06	12853.3	680950	2.74571e+06	45160.7	386681	17643	212613	551282	566155	1000	560778	33604.1	1.76965e+06	607278	137706	67897.8	535875	106161	1.39092e+06	697031	1000	85089	26609.8	41433.7	55971.1	33222	1000	239280	1000	423520	4.627e+06	156784
614	150222	37474.7	361122	91299.8	56696.8	1000	380888	43997.7	287504	315079	300998	27711.7	7.421e+06	352352	1.85557e+06	1.66349e+06	1.18797e+06	14757.6	541113	2.32865e+06	21512.2	265423	1000	112982	474764	546037	1000	306769	18755.7	1.41505e+06	812337	202187	4368.29	488089	116923	1.49125e+06	494155	1000	61128.4	12186.5	64453.5	21343.1	35702.8	1000	503149	343792	385751	3.78578e+06	26296.7
604	197036	54249.5	42119.7	122325	23488.1	1000	362905	48319.8	312247	136063	401832	98510.1	7.87747e+06	438982	1.97036e+06	1.86298e+06	1.19422e+06	21707.7	516819	2.27143e+06	26148.8	400907	67303.1	192937	492808	565148	3210.05	538366	11372.9	1.23367e+06	788709	197377	28080.1	433607	119189	1.46811e+06	563817	99720.3	72880.2	10429.8	52184.5	1000	19812.4	102520	256520	289788	367458	3.61681e+06	10124.4
618	73579	5156.26	13740	55553.7	34327.2	1000	1000	24310	273633	166547	430671	106318	7.00159e+06	422618	714052	1.69852e+06	1.20427e+06	89103.4	408833	1.52599e+06	45414.7	265401	1000	139636	282868	340334	88661.7	391180	74204.3	1.58142e+06	516299	223578	18922.9	504362	130448	1.28141e+06	569561	26266.4	58394.4	9553.33	1000	34250	34433.2	1000	509678	359834	405759	4.46252e+06	166257
622	130344	22313.7	317543	82027.9	39965.5	159820	11881.3	50327	324842	307350	487231	107846	9.02187e+06	414175	2.18618e+06	2.13004e+06	1.1964e+06	13989.9	817452	2.60424e+06	84058.8	463022	77827	205269	526219	674838	1000	295146	17230	1.38393e+06	533693	207962	1224.21	21677.9	151699	1.16776e+06	510742	61644.8	79806.7	14637.8	46137.6	105644	21486.7	34410.2	507312	288439	256044	3.19825e+06	177441
617	210187	61977.6	83657.2	132860	22808.1	173934	432657	51108.1	244415	150070	328787	103130	9.24109e+06	363558	2.17861e+06	2.18385e+06	3.36392e+06	16131.8	751698	2.91621e+06	20201.4	277368	47132.1	285565	649014	530403	2582.05	436735	65754.2	1.8706e+06	645087	125330	29954.8	18226	91412.1	1.27119e+06	557230	6144.58	80645	42301.6	57223.3	30777.7	31304	189762	630256	281733	285677	3.83948e+06	38163.8
624	207509	102227	116606	149675	13643.6	1000	376455	46114.8	267217	246913	317320	114097	7.83852e+06	426951	1.86065e+06	1.95032e+06	2.70279e+06	13393.3	456563	2.30279e+06	26733.7	328597	41702.3	204569	657298	744799	76694.5	352422	65080.3	1.30166e+06	707797	1000	7775.72	483398	344185	1.27599e+06	432288	22421.7	75291.4	25876.1	19402	73985.9	30109.5	818849	21471.6	404322	384942	4.25813e+06	2231.92
625	196203	36973.1	465696	104396	1000	1000	580056	40431.1	467368	229339	477279	64503.8	7.6258e+06	448833	1.72522e+06	1.57624e+06	1.20841e+06	91262.7	284334	1.47326e+06	23826.3	227110	91047.7	125694	345713	406598	49767.9	603732	61014.7	1.42862e+06	912165	203319	41085.7	457813	209494	1.49519e+06	435615	5461.95	61758.6	13401.8	22142.2	64954.6	33230.1	651874	395997	334347	441179	4.62011e+06	10792.9
628	134002	46587.2	109529	149963	29144.4	1000	83731.2	10340.8	93709.5	14697.7	329866	35303.6	6.79119e+06	391845	1.76058e+06	1.77142e+06	2.47836e+06	79999.6	170146	2.11263e+06	19752.4	182117	61745.5	172964	473361	381430	11591	234033	16360.1	1.30891e+06	468878	195501	58056.2	38975.4	207750	625803	493393	18291.8	68579.6	12466.7	2597.62	17380.5	19253.9	622297	407106	383516	334822	2.17033e+06	43028.6
627	154465	204714	129533	340581	96694	154010	610747	73951.6	612770	205316	501011	97677.1	7.746e+06	476583	1.60123e+06	2.42609e+06	3.40466e+06	24159.9	802212	2.76338e+06	49511.3	363895	77410.5	280581	725695	800592	77516.7	672605	21616.3	3.94569e+06	42153.8	462413	76640.1	20483.7	1000	737670	680302	7393.4	91961.9	13813.4	1085.26	28050	18285.3	8.89379e+06	539993	335328	283213	6.34709e+06	69709.3
629	199390	46878.3	62095	111577	78004	216134	94921.1	21728.8	304019	174984	584626	167009	1.15614e+07	837751	2.21518e+06	2.76496e+06	3.37024e+06	12121.3	777669	3.14148e+06	27617.9	497498	175111	262751	734630	838803	1000	377864	31626.2	1.70005e+06	631616	126216	52687	584065	139070	1.48563e+06	658302	38858	106191	14713.1	82214.7	153046	48104.3	1000	450938	379003	309839	5.08377e+06	18469.9
631	133362	84671.2	74678	229077	39414.7	236880	299740	25186.7	146272	343918	825813	92930.4	7.1103e+06	558506	1.72576e+06	1.69415e+06	2.76052e+06	88913.8	378898	1.55632e+06	31494.7	184253	62347.3	175826	413520	379047	86364.3	381070	66518.5	1.8128e+06	271201	261844	6068.37	16887.4	247535	669518	565700	12808.7	64617.5	21675.9	24388.3	12721.7	54285	525821	529584	422844	450530	3.08445e+06	12034.4
630	93374.6	52444	50949.2	172691	58311.5	256186	205826	38178.7	280984	350991	287999	130768	7.59442e+06	627344	1.62403e+06	2.2016e+06	2.8916e+06	14267.7	659413	2.04783e+06	50326.2	329588	100701	215180	492553	531408	102450	687976	1000	1.81678e+06	522117	253276	64747.7	29855.6	102137	705743	526688	46339.8	88737.5	16087.1	31615.6	64530.8	30712.6	326587	276958	1000	430097	5.28015e+06	152666
656	126327	39186.2	77740.2	114649	21732.2	145353	63395.5	49533	212869	27743.1	1000	77032	6.64902e+06	391995	725487	1.51662e+06	2.57118e+06	82184.2	243374	1.44106e+06	21637.4	173585	27893.9	172093	383535	291917	1000	372826	58420.3	1.68741e+06	363265	248020	48796.7	567195	82200.3	666437	432193	92455.4	56738.9	59671.9	7940.77	70260.9	35601.3	1000	443862	445277	364471	2.81213e+06	10755.1
631a	114749	56376.2	90039.7	160088	30868.8	1000	167463	56384.7	286240	290576	348697	173490	9.69447e+06	847593	2.13624e+06	2.73069e+06	1.20469e+06	22053.5	826599	2.861e+06	45293.7	333902	226297	244296	746321	657922	79828.1	412873	71921.7	1.27221e+06	778327	195020	82487.6	39606.9	123302	1.37974e+06	486661	44702.2	110555	25303.3	97628.6	47201.2	40894.7	763232	544293	425520	421339	4.218e+06	20647.5
685	136835	24969.8	34568.1	1000	32340.3	133337	76526.7	16517.5	323393	130804	293966	133139	8.92052e+06	483590	2.20048e+06	1.71094e+06	1.215e+06	20864.5	528322	1.9582e+06	16823.6	306921	127287	275417	505206	566998	1000	340469	68589.8	1.64097e+06	573915	242158	12243.7	27669.3	138072	1.1975e+06	545966	66827.7	67195.2	28858.8	25283.1	81876.8	16199.5	414863	523266	280065	334677	2.59874e+06	30044.5
637	108032	16061.8	69742.3	115709	10988.5	270430	1000	47136	237631	148145	316850	59412.5	7.91064e+06	436565	1.86951e+06	1.58336e+06	1.19786e+06	95549.1	157871	1.98533e+06	21536	216234	130134	81312.8	329757	345078	1000	295368	64735.9	1000	665217	175144	18227.6	384641	96052.6	1.23655e+06	419880	4941.34	62661.6	9222.25	15932.4	106379	11157.7	1000	502850	1000	369049	3.52224e+06	60591.1
632	110968	68793.3	95746.3	139859	24923.5	1000	47952.4	26292.8	228720	284482	539058	126930	7.90178e+06	706576	1.93482e+06	2.33327e+06	1.19212e+06	15597	417168	2.06087e+06	34555.5	275836	146672	183871	566068	485783	78887.8	660569	12175.5	1.0103e+06	913376	1000	79043.5	19622.9	339086	1.55636e+06	453295	35213.7	100822	13787.9	22961.1	87714	17606.2	982730	267567	491244	498637	5.59564e+06	43724.6
635	197829	104898	73248	169351	42200.1	167620	63095.3	18663.2	519291	153698	453200	118133	9.46629e+06	454553	2.23912e+06	1.99785e+06	1.20085e+06	23905.6	512381	2.67654e+06	6388.75	390582	102550	271039	677278	868193	105596	268608	69740.8	1.68342e+06	776458	247721	23529.8	579904	200688	1.49267e+06	590805	8489.12	79527.4	22020.6	36882.8	69862.5	30322.9	1000	625190	320355	382219	4.19247e+06	12021.1
638	192308	71192	618764	139732	62668.3	294010	1000	21853.3	443921	420119	458095	103152	8.10475e+06	323282	2.14519e+06	1.42854e+06	2.53208e+06	96433.1	230384	1.74222e+06	31140.7	365537	90975.1	159098	331205	574867	1000	373550	3580.95	1.64579e+06	537920	242181	51832.3	27916.1	195490	1.33659e+06	668665	54646.5	53644.2	23042.6	46662.8	24113.8	45344	1000	320715	310717	346140	2.94999e+06	22759.4
640	140653	33616	29814	83878.3	35235.3	1000	33500.4	47179.8	498522	231443	253041	111403	8.21693e+06	373031	1.98562e+06	1.4864e+06	2.52485e+06	99567.8	270083	1.92146e+06	37797.8	368573	115992	171523	421351	703183	39525.1	184358	67285.7	1.09634e+06	794785	181983	53825.2	18555	217991	1.26202e+06	423336	1688.72	57523.4	13998.7	15358.9	72797.7	12368.1	178494	280425	367634	272593	2.46202e+06	22580.4
687	207889	95467	107092	171213	80350.9	1000	381231	41217.9	537668	389970	662575	112055	8.8755e+06	433321	2.27997e+06	1.87273e+06	2.78614e+06	105362	352164	2.2159e+06	30218.6	314711	111119	172638	383448	468429	42590.1	400344	23812.7	1.40544e+06	788493	229691	41709.4	19931.5	190715	1.56267e+06	600287	14757.2	81124.6	11373.2	53955.8	39948	46924.1	1000	513202	295165	392895	3.77688e+06	74147
642	150975	52462.1	58988.8	118218	21253.7	1000	466688	35988.4	341913	372112	184000	124712	1.05229e+07	812777	2.22827e+06	3.16716e+06	3.43218e+06	11592.2	970512	2.82863e+06	152600	508844	146450	331944	773010	847245	11953.4	488324	82856.9	1.52673e+06	702839	204977	33016	503588	154825	1.33578e+06	533480	36039.6	131853	11837.6	23251.3	95745.2	30120.8	120522	493535	1000	427006	5.2608e+06	166089
645	197530	100377	633863	177729	88177.8	271418	311725	63523.5	525337	369218	547329	162327	14205022	896020	2.71851e+06	3.28783e+06	1.19556e+06	19444.9	1.15594e+06	5.63729e+06	31000.3	720333	228519	297030	1.01825e+06	1.10633e+06	97529.7	613766	30412.8	1.64378e+06	657911	257557	124529	17407.9	116790	1.91123e+06	957193	99668.9	133449	18882.5	113850	184370	4296.72	1000	767453	289903	801620	4.70166e+06	7409.61
688	132936	12155.4	33207.7	71565.7	17132.4	134729	51140.5	20250.3	398622	289975	290577	189091	9.97889e+06	725878	2.37121e+06	2.1981e+06	1.18768e+06	120908	503429	2.15727e+06	33507.2	434883	259510	44661.4	430415	452349	16735.8	295045	74350.5	1.11375e+06	1.00774e+06	132316	42842.1	32176.2	176349	1.55733e+06	504070	40186.6	90498.9	21881	34638	123793	38364.8	1000	306723	46622	357152	3.10795e+06	41054.9
641	179428	121186	163947	4156.89	85192	1000	111074	82117.1	409842	315224	584319	113879	9.51406e+06	484925	2.13849e+06	2.57264e+06	3.43916e+06	30074.5	511742	3.21437e+06	35690.7	392489	103431	255683	656149	638712	88543.5	422370	46634.9	1.88392e+06	442500	271001	94870	23386.1	193978	1.08631e+06	843241	51578.4	105171	11641	79155.5	85798.8	58781.8	238744	533689	359273	358854	5.0596e+06	137365
646	299506	140210	320509	333184	63327.1	144880	529540	19392.1	459152	290416	352448	27449.2	5.53194e+06	235664	1.47975e+06	1.05053e+06	1.19079e+06	63471.7	1000	581859	14602.3	159321	1000	52428.5	278010	359161	47421	718825	10799.8	1.46898e+06	806706	267448	42314.9	543294	199876	1.66312e+06	453196	7225.34	35010.9	15269.5	3472.51	4211.11	43046.1	191214	363450	302635	575541	5.9833e+06	6802.66
708	110056	51799.2	48631.6	114756	32227.6	59114.9	162603	18218.2	219865	281703	299646	65173.2	7.74777e+06	610039	1.79404e+06	2.24123e+06	1.21815e+06	32492.8	440249	2.79409e+06	17978.5	284132	46842.9	239180	717778	597433	33831.3	340794	75863.3	1.16381e+06	572916	194243	23591.6	425731	109841	1.15106e+06	482014	47082.7	97869.4	11622.7	16832.3	28192.8	26355.2	39787.5	419753	516317	396564	3.90216e+06	62282
709	183296	80668.3	85013.1	159325	30230.7	140713	54982.8	46669	442752	352826	456525	109814	8.41456e+06	468323	2.00351e+06	2.04116e+06	2.80117e+06	23217.7	332087	2.6266e+06	25797.6	367526	31632	197017	603694	772508	20313.6	575158	47035.2	1.3611e+06	685271	231781	41750.7	30418.8	163970	1.35254e+06	576882	17783.3	88403.1	10470.2	17939.9	80740.5	11578.1	507681	234037	417064	423166	3.08241e+06	28963.9
647	186245	82057.2	113810	192819	50707.9	1000	502795	21429.1	362398	430410	436156	88817.7	8.87203e+06	557186	2.12472e+06	2.30183e+06	1.1962e+06	40334.5	441984	2.67369e+06	179987	500554	103364	218416	615760	869971	30836	536168	29762.4	1.59105e+06	841842	248852	45187.7	17636.2	182629	1.62205e+06	570881	31809.7	94745.1	13014.3	55221.3	48954.9	12698.2	1000	94957.4	395281	427273	4.66433e+06	13143.1
649	193560	111924	89175.1	173048	17274.4	1000	354687	23646.9	732994	361054	1000	208274	1.41106e+07	860088	3.24586e+06	2.873e+06	3.63064e+06	32513.9	722643	2.62346e+06	43593.5	622584	280759	231811	537541	784201	179717	537146	72059.7	1.38793e+06	1.08738e+06	221341	41668.5	55445	272583	1.68394e+06	569400	50489.5	114698	100384	136963	103656	8240.04	245394	478089	340212	363793	3.87084e+06	9774.08
648	230049	132789	132879	174391	19970.3	1000	465875	44252.1	354082	287129	394026	143514	1.18447e+07	440762	2.7082e+06	1.57305e+06	2.31943e+06	134756	274883	1.50199e+06	131209	321960	156924	185821	355006	442332	84987.6	425884	1000	1.36313e+06	927184	230642	36476.6	557641	415632	1.39729e+06	397055	33407.8	65711.1	62064.9	44669.7	151209	8453.74	1.72714e+06	459313	1000	313522	3.05324e+06	8772.13
710	94311.7	47177	20744.3	61689.5	35803.4	28087.6	338737	36484	157814	246664	289521	31041.7	6.6666e+06	412451	1.24549e+06	1.69611e+06	1.90656e+06	92941.6	445925	2.14144e+06	132962	296863	1000	174778	480500	461104	36372.5	301469	23613.9	1.27955e+06	279814	166211	30536.8	1000	56088.4	1.01628e+06	389402	33832.2	70926.4	8887.59	59272.3	53349.9	25017.8	387360	254828	192597	311404	3.43907e+06	21547
652	90224	48272.5	49464.5	122438	29554.8	78263.2	396360	20901.1	299034	91609.2	229509	131116	1.06981e+07	714720	2.08952e+06	2.50135e+06	3.02364e+06	8680.95	1.01022e+06	3.17108e+06	59408.9	439484	123431	356606	722458	745618	60548.9	285091	67008.3	1.51925e+06	698393	104356	26783.8	1000	143669	757073	408729	57711.7	103726	11793.4	18348.3	70064.1	23571.1	545069	343601	102714	396696	4.30417e+06	19537.7
650	159364	80017.2	94902.4	222910	25516.7	70146.4	106461	42776.7	309104	308774	197943	181914	1.29238e+07	844789	2.49315e+06	2.6286e+06	3.35653e+06	41560.3	584842	3.95889e+06	38295	388606	194783	172965	463672	476144	46367.9	434027	68530.3	1.48564e+06	819146	220387	72371.5	341285	143732	1.59704e+06	604303	29855.9	108115	19212	19522.4	144448	39591.1	163062	658257	1000	385689	3.5651e+06	152082
711	208513	83114.3	491258	158410	45351.4	35174	253446	38332.1	308164	303267	285246	115234	1.01417e+07	517464	1.98695e+06	2.2047e+06	1.77317e+06	33479.2	505509	2.48388e+06	15109.9	264165	112926	163677	504544	471447	49600.2	378603	69983.8	1.2023e+06	758913	198102	30229.5	313014	139766	1.62373e+06	619082	159347	92079.6	29619.4	40427.9	143309	26903.8	166066	407022	208427	471931	5.03431e+06	25848.8
653	206193	55758.1	120683	143655	29532.5	79832.1	147158	37262	289161	91195	152994	106605	9.29909e+06	398805	2.34404e+06	1.87091e+06	1.35666e+06	9459.23	400440	2.37038e+06	5282.66	313464	89838.1	226446	669094	704204	49237.3	275644	48318.7	1.38743e+06	710115	186774	38902	309705	146111	1.32428e+06	475889	31241.2	77899.3	73095.6	36667.8	30228.4	14537.2	47920.8	436319	31265.4	303760	3.44975e+06	123965
654	217925	119796	104087	213968	74226.1	61011.2	173300	17718.8	196239	338655	551623	139026	9.34011e+06	534955	1.96273e+06	2.24157e+06	2.81314e+06	32986.3	744043	2.62497e+06	26095.5	300332	62882.8	278153	695742	673258	90346.8	543247	20297.9	1.70799e+06	640971	232244	74405.1	397482	68452.8	1.28064e+06	696161	15023.8	92914.6	18846	14857.2	114994	68351.7	371430	377462	89658.4	446966	3.67696e+06	16680.5
712	107543	71463.2	40625	102240	12654.9	42035.7	249348	33150.2	131159	230054	345554	113523	8.19843e+06	558365	1.63324e+06	1.89751e+06	2.03647e+06	5796.11	608673	2.22718e+06	7604.19	332080	104163	150452	436861	587036	47197.3	242351	54312.5	1.02761e+06	272972	150189	6922.49	226459	84729.4	920574	347443	23880.2	77938.9	20868.4	15705.8	97488.9	58276.9	425174	356889	298465	278862	3.1575e+06	22656.9
658	221417	39100.3	400298	95737.3	16518.6	48245	90231.8	33900.5	353840	101101	147344	78308	6.59211e+06	229778	1.68155e+06	1.08177e+06	373638	81081.8	24699.1	1.10308e+06	19863.3	202653	14707.8	113008	250397	415974	25287.2	295346	76917	1.55044e+06	712123	208890	18118.4	1000	181039	1.11136e+06	393043	11380.9	26090.1	7605.8	40424.1	23412.8	50508	52076.4	324225	14053.4	240564	2.81411e+06	135324
660	142546	37961.9	51646.6	62119.4	15760	33029.5	229417	39569.6	341659	116327	441560	129874	7.97327e+06	620963	1.88794e+06	2.10747e+06	1.07048e+06	37206.8	632448	2.34387e+06	25521.8	396639	68284.5	116764	415210	517785	27558.1	278869	48101.9	1.15101e+06	879661	113194	75945.7	263170	174374	1.60789e+06	470996	32079.1	86164.5	8154.07	30987	38233.4	20567.6	105809	531276	135749	481790	4.28541e+06	187373
713	152895	110236	127832	250166	57381.5	1000	596180	66121.8	158944	355118	522422	195737	1.12546e+07	856795	2.6614e+06	2.95817e+06	1.96782e+06	12992	720613	2.77236e+06	11185.5	179650	248753	225204	602982	284935	77483	509780	17998.3	1.26511e+06	1.01309e+06	225645	111330	1000	147228	2.33725e+06	820008	18785.7	124794	17673.4	81006.9	134861	28242.3	715201	513627	69757.3	609737	5.85959e+06	126172
673	81446	38466.5	27963.1	65282.4	36215.6	62387.5	90240.2	46253.3	333745	324134	263191	120314	9.18879e+06	540231	2.09282e+06	2.14612e+06	2.95934e+06	3974.4	661884	2.7088e+06	59846.8	461911	110661	224247	604678	839127	25671.9	259829	75087.6	1.37828e+06	651893	197316	33838.9	293751	155682	1.09808e+06	675084	23513.6	86809.8	58746.2	21916.1	117612	13275.2	1000	845396	194968	337312	3.34462e+06	17180.6
671	194886	66883.2	49978	114806	42026.3	29290.9	71922.6	28336	298565	278999	504849	49260.8	7.53806e+06	392258	1.61329e+06	1.75506e+06	1.9835e+06	23178.3	568114	2.67628e+06	18344.3	338791	4093.76	209420	521179	616044	12632.3	513627	16055.4	1.49332e+06	650276	210955	36254.6	1000	131537	1.18372e+06	516694	24966.9	74585.2	24891.8	20465.4	53275.8	13339.7	1000	271514	49846.6	333648	3.78255e+06	147193
719	126649	50816.3	394425	110368	75105.1	1000	143965	47900	292368	321289	392355	56712.5	6.61315e+06	355215	1.60109e+06	1.51943e+06	715178	91493.7	410601	1.58461e+06	15814.1	209101	1000	33974.7	287758	336694	23778.9	337767	40554.7	1.22998e+06	649648	197747	26434.7	300961	83902.5	1.38779e+06	655112	12212.4	61659.3	36503.6	89867.9	67339.8	53437.3	1000	312988	24526.6	388978	4.38224e+06	14429
674	122894	46204.9	50042.6	106044	27633.6	25574.5	108717	35075.1	248011	96526.9	549377	61930.2	7.64153e+06	510815	1.51912e+06	1.58328e+06	1.27712e+06	107247	451560	1.32991e+06	49550.1	261752	96764.5	249082	672876	650063	40126.5	553421	76176.2	1.62442e+06	276515	238920	30177.3	1000	101358	714072	365527	28375.9	66539.3	15400.2	18984.2	51971.8	51009.4	255560	473331	376563	498154	4.24071e+06	18696.7
677	170072	41353.9	93636.5	95049.6	32630.4	56521.8	159609	34142.8	271602	105464	400980	130109	9.30755e+06	619992	2.01222e+06	2.20088e+06	2.89403e+06	126268	533171	3.26438e+06	33936.8	318915	137070	259875	631970	554643	54125.3	264241	65051.1	1.36472e+06	718027	120071	71385.6	314741	128496	1.23892e+06	483690	65751.8	87621.4	10716.5	16880.9	8873.53	22409.1	255549	556982	213226	379693	3.8472e+06	21407.5
720	133045	50260.6	63427.1	118721	40067.4	35842.1	110110	50971	205597	328645	488430	98228.4	7.06924e+06	454192	1.58338e+06	1.96231e+06	2.43947e+06	13368.8	605176	2.36968e+06	31197.7	361694	1000	248058	516212	787897	18359	310362	62274.2	1.73958e+06	572806	230317	25230.1	389205	86997.8	665516	672821	8569.05	81041.9	10983.4	22338.2	35426.6	33307.5	209657	624688	259927	371180	3.90823e+06	113360
678	94756.3	44808.8	58347.2	94165.6	38247.3	88330.6	114424	47630.2	352064	282265	148921	42220.7	8.12842e+06	401234	1.85465e+06	1.63904e+06	1.45185e+06	111109	502992	2.44797e+06	27121.2	317952	1000	130333	491567	626360	55900.9	247296	76879.3	1.17688e+06	695419	97411.5	21870.1	1000	158575	1.13662e+06	515229	11004.6	63737.4	28133.3	43814	15301.9	19190.1	1000	286318	105028	293423	2.18095e+06	35962
680	137573	54382.9	407435	109712	71128	1000	106796	47376.3	288510	330797	456165	161445	8.34776e+06	706551	1.94012e+06	2.53842e+06	1.70895e+06	11414.8	621214	2.637e+06	18775.9	412845	165890	182794	562356	533734	74176.1	598258	20358.8	1.3754e+06	679324	223937	61027	335462	132026	1.53116e+06	700940	18352.1	105165	35295.4	24361.6	16566.8	23851.3	1000	362331	197590	542774	5.16957e+06	21437.6
721	284545	134790	128606	188909	17031.3	60110.5	381948	39772.5	254362	278925	406299	117628	7.00594e+06	504403	1.68027e+06	1.60845e+06	480226	93778.8	481509	1.08403e+06	17374.5	240679	122569	240938	600201	494259	50502.9	451040	75702.8	1.16477e+06	294512	180707	38068.3	267571	185493	1.19637e+06	441678	11085	62920.2	16879.9	41542.5	25334.1	83672.7	786130	355172	428381	551357	4.77294e+06	28017.8
682	222302	72338	100475	175467	53590	102174	138706	34819.8	399222	355637	689226	140335	9.85996e+06	646989	2.18059e+06	3.02025e+06	4.31539e+06	20775.7	892581	4.57648e+06	111435	674303	1000	328935	826563	1.14517e+06	31022.3	480971	49190.6	1.68935e+06	749631	254623	43491.4	1000	190051	1.35814e+06	649069	61095.9	119678	4787.36	15568.6	28717.3	8037.77	140394	407638	253399	407198	3.58164e+06	23289.1
683	206960	76007	101910	166612	70157.9	60601	255363	52447.3	327649	325078	585733	178869	1.4593e+07	794499	3.51517e+06	3.23199e+06	3.72479e+06	17634.9	797118	3.61123e+06	26584.3	466629	216303	232122	567453	559881	67695.1	622708	11825.4	1.62104e+06	785096	243473	82977.3	400643	152941	1.54061e+06	645081	33725.7	131836	32513	177948	183288	8879.83	75799.9	655185	264475	418866	4.83477e+06	15469.7
730	269915	89556.4	629580	172698	37869.2	271676	116325	28621.6	783828	306925	247799	76629.1	8.43013e+06	218475	1.84213e+06	1.18511e+06	724394	105232	322462	1.42624e+06	126702	326579	64461.8	88438.7	163777	421385	43786.7	426413	11008.9	1.7964e+06	608218	262886	23084.8	1000	406819	1.92517e+06	494269	36118.3	46435	33556.3	19843.3	33475.7	21504.7	324170	335930	83011.7	301584	3.93859e+06	18136.4
731	151900	296452	965120	476786	173603	813386	1.28592e+06	102877	786581	521586	498462	46244.9	5.75145e+06	53324.2	1.45134e+06	1.31786e+06	110768	74185.5	46380	1.09673e+06	12521.7	146467	1000	76051.6	243191	297667	384060	552565	25099	4.55431e+06	444702	554044	175457	1.03102e+06	436404	925675	933892	13239.9	51125.4	8542.5	42663	53306.8	24499.8	9.21377e+06	362288	52046.7	1000	5.50403e+06	21223.5
687a	160579	55486.6	113857	138151	36340.1	48469.7	148299	28265.7	340219	344623	218784	142524	8.84952e+06	755243	1.74764e+06	2.78141e+06	2.40152e+06	25994.6	785615	2.56116e+06	89497	398453	165956	225389	487047	612669	29098.5	572975	18138.9	1.66405e+06	789296	248534	43301.9	376776	162131	1.43541e+06	564645	22694.8	106254	20401.7	31903.1	50563.1	26797.1	45305.8	437919	473591	656560	5.17149e+06	15155.9
689	221792	31537.3	55864.1	82433.2	30377.8	102408	161310	15044.5	343743	300559	451187	146255	1.06981e+07	669221	2.9836e+06	2.24456e+06	2.23661e+06	37638.7	719988	3.78028e+06	32402.5	458335	178273	239858	815883	718672	45965.8	362017	23922.2	1.42451e+06	775365	207435	93356.5	327063	167321	1.42185e+06	551868	34839.4	89690.9	13733.9	26388.1	128373	11599.9	279059	699848	262048	424616	3.92129e+06	17952.5
684	168097	33227.4	75991	83104.1	23047	1000	78059.6	13906.8	256389	97093.3	303875	141985	7.72473e+06	668091	1.44798e+06	2.11329e+06	1.53449e+06	3308.25	607460	1.90837e+06	31630	360868	183927	174104	375807	507540	61165.6	670151	77115.2	987800	777961	160402	20109.7	241274	130218	1.22858e+06	338679	21744.6	80731.7	11467.4	16524.9	72423.2	61482.1	1000	233748	541568	486434	4.6582e+06	16195.5
686	122155	30769	46154.9	76161.8	44700.8	42251.7	105005	22474.7	333006	265166	436548	113480	6.88688e+06	309712	1.31978e+06	1.39464e+06	1.42188e+06	85217.2	366819	2.22859e+06	27404.8	288768	143883	147802	410394	520056	32894.7	260694	23779.6	1.35771e+06	785360	125046	42089.4	1000	155412	1.25693e+06	466914	10517.7	49581	53825.2	13798.8	88872.2	59230.3	7895.01	477579	281364	296333	3.40409e+06	15741.4
693	103043	33000.7	49560.3	93416.2	33127.1	102236	263250	47925.7	384389	314883	534668	106607	8.65583e+06	500405	2.47994e+06	1.81544e+06	2.00819e+06	102107	430426	1.90331e+06	28692.8	328779	24593.7	253320	615533	671198	58861.1	245377	12327.2	1.71874e+06	794274	127711	71134.2	1000	185192	1.41712e+06	643994	22373.4	66654	46258.1	33458.8	105205	10527.5	216494	653532	317919	444230	3.46626e+06	15385
692	251784	87792.8	139549	194019	46502.8	66756.7	103452	49201.8	431793	344171	454045	138331	1.24601e+07	728510	3.53306e+06	3.33074e+06	3.33456e+06	19099.7	973007	3.65882e+06	82124	743440	170951	230187	692438	971342	65926.3	643243	83166.6	1.6971e+06	801430	264372	57042.4	1000	213527	1.54005e+06	712668	18545.1	131109	17712.7	102373	26836.3	11883.5	1000	356053	371340	488307	5.47361e+06	23667.1
732	144204	35798.9	34917.1	61580.8	33687	230364	175608	17048.7	570880	99293.2	1000	130489	8.63498e+06	495552	1.98315e+06	1.78794e+06	1.57314e+06	32735.3	709079	2.12596e+06	166079	420291	155804	210163	707587	865619	58952.2	524620	34375.1	1.16095e+06	691303	187666	32664.5	1000	299258	1.31874e+06	424475	33072	66158.6	45195.2	12727.2	59134.4	42978.2	364278	287415	410248	365738	3.37161e+06	14818.8
695	137229	63256.2	51090.5	97038.7	32433.5	86314.9	174848	24903.5	396888	260676	241244	119629	9.91236e+06	506272	2.24672e+06	2.07113e+06	3.08148e+06	11323.9	733425	2.56673e+06	59919.5	405798	63648.3	259210	600634	655218	38633.3	570955	27017.8	1.57372e+06	321957	244073	53416.5	1000	185394	1.16482e+06	447312	11562.4	77215.2	23907.5	98988.3	126007	11459.4	508189	530880	443379	305705	3.82447e+06	147798
714	131353	63879.9	108184	160033	33193.7	1000	61928.3	18061.9	269920	331213	574313	95305.5	9.02105e+06	593617	1.66336e+06	2.52235e+06	3.73029e+06	29189.3	719395	3.57884e+06	35172.3	369694	54299.5	283084	771794	730826	16527.8	657722	71415	1.79658e+06	301823	271873	55942.6	420747	72070.8	731910	671658	13033.1	91994.4	36472.5	40615	80732.6	23886.4	1000	46686.7	593914	362805	3.58727e+06	12690.4
744	157687	64866.9	86528.6	152836	21675.4	1000	150589	28553.3	280354	110862	1000	116001	6.73898e+06	629631	1.14263e+06	1.67522e+06	1.93411e+06	84650.6	513815	1.68096e+06	17418.1	272969	106507	145436	379225	443479	63643.2	551447	9126.73	1.44438e+06	280550	209304	27022.7	347711	127936	1.02832e+06	449474	52626.4	60195.6	21522.8	43919.6	12839.3	50585.1	147415	213768	611331	401710	2.98509e+06	128285
745	170427	71124	134488	196293	45447.1	106578	202322	58960.4	409009	284410	512285	108221	8.44887e+06	539548	1.87763e+06	1.85016e+06	1.73263e+06	107289	499783	2.15455e+06	31619.2	215778	133547	146101	418168	448118	56938.8	508321	87303.5	1.81071e+06	731641	276707	31593.6	1000	199503	788768	548652	35483.2	68058.1	24233.1	84768.9	21084	38680.3	538290	626985	325743	397104	4.42759e+06	157521
732a	166305	66167.7	97042.9	139057	25382.9	39015.6	298022	14205.5	203357	93869.8	602087	112600	7.28036e+06	489376	1.60512e+06	1.78779e+06	1.89786e+06	13627.1	85108.1	1.49947e+06	30334.5	254128	1000	270461	552087	553700	55808.1	310237	23610.8	1.76802e+06	499083	1000	24106.3	408606	82243	1.13079e+06	453042	29194.3	65357	7929.03	14569.2	13342.7	23473.5	572305	246216	589456	406392	4.63973e+06	27209.4
728	171533	70660.6	84998.3	137459	60816.6	72703.1	95600	52292.1	376540	328704	533664	148706	1.01417e+07	675630	2.27695e+06	2.61895e+06	2.9637e+06	20542.4	969359	2.72924e+06	11032	543752	206126	259542	840497	947439	24543.5	346889	37092.1	1.5622e+06	758511	225939	53385.1	374898	194850	1.37648e+06	658471	62320.4	101659	13136.7	72041	88340.3	15418.4	86164.2	668912	409246	486989	4.54216e+06	149533
746	136713	36500.1	88518.6	113130	31411.5	1000	136549	53978.4	232411	95312.3	334415	63602	7.07719e+06	365129	1.51136e+06	1.89572e+06	2.68599e+06	37985.4	90514.7	1.9149e+06	26144.6	223003	19265.3	252227	589422	461221	47107.7	479613	23802.9	2.0342e+06	467664	300944	42890.6	442356	102255	824681	548088	33693.2	66281.5	7396.12	57298.7	22490.5	32054	1000	179300	450908	401630	1000	149033
736	188153	61354	137586	163262	32306.8	123955	205555	37913.9	436607	89824.7	235572	54818.5	6.85917e+06	411517	1.02131e+06	1.23871e+06	924523	78048.1	59563	1.47186e+06	33882.3	204211	69195.8	101842	180270	259603	49471.5	637218	20730.6	1.40761e+06	343978	211944	76051.8	1000	224035	1.38022e+06	462642	18936.8	43181.4	89274.8	28644.7	15229	48872.2	513539	381808	371214	417108	4.32945e+06	27364.5
735	152051	47880	338629	97098.9	40522.2	23115.4	223772	18682	172817	262880	640789	82462.5	7.17437e+06	405292	1.36095e+06	1.78921e+06	1.68348e+06	16399.9	111952	2.02536e+06	20875.7	249242	80500.2	191125	474197	498520	53457.1	654333	76528.8	1.40452e+06	291450	221656	34258.4	347372	108847	1.3383e+06	466623	39916.4	62964.1	10885.5	31012.4	50656.8	48325.6	572993	240367	493404	383318	4.4869e+06	18137.4
737	170621	78862.8	71009.9	115159	60332.5	9266.41	104874	34368	297697	297104	355364	89106.9	7.04826e+06	344318	1.55358e+06	1.79994e+06	1.12101e+06	23652.4	77694.7	1.8788e+06	16947.4	218183	73302.8	167226	518372	460784	29018.4	316956	74924.3	1.16897e+06	828852	203137	14196.4	304466	137691	1.54196e+06	581050	16464.5	61340.9	19157.1	24258.2	18539.7	17729.7	151522	294644	318403	379177	4.4691e+06	19884.1
747	212357	102970	57312.8	190122	44739.1	1000	577779	35894.7	261541	308104	542900	147495	9.29895e+06	588993	2.0289e+06	2.23589e+06	1.59538e+06	19283.5	516229	2.80001e+06	45219.6	381058	66291.2	183043	604301	617929	52854.8	242709	11849.1	1.31067e+06	727785	218413	39951.3	1000	118462	1.42655e+06	591574	19768.8	92109.1	8992.95	21245.8	36375.9	14892.8	1000	571293	148950	465918	4.50006e+06	1000
738	214433	60430.9	462365	98049.7	46803.4	1000	20076.6	26988.5	260968	331116	465261	119357	9.63857e+06	469016	2.64356e+06	2.19511e+06	2.61114e+06	25560.6	639371	2.94975e+06	34770.8	508596	21066.2	196230	577286	751563	46574.5	467449	6756.1	1.6656e+06	626712	251040	9382.14	1000	121334	1.34915e+06	570629	31086.8	93062.1	9988.01	23760	105917	31362	6.9969e+06	208737	101671	423450	4.28301e+06	4529.25
748a	206874	112089	138803	244523	53667.3	1000	521835	44502.7	510925	290579	487456	142069	9.79155e+06	764032	1.9441e+06	2.92988e+06	2.60759e+06	6144.07	696674	2.77059e+06	75095.6	381596	59876.8	272403	755940	573127	47589.4	419792	4483.84	1.86413e+06	527725	281782	33610.8	428136	322857	1.13129e+06	517666	27285	119534	11748.5	11579.3	144847	31774.9	1000	254315	1000	696274	6.05768e+06	109051
755a	244009	51529.3	22083.8	93230.8	36631.1	220566	133477	14815.7	577440	323037	171466	76919.8	1.02382e+07	494037	3.06344e+06	1.88027e+06	1.33451e+06	18858.7	596421	2.28003e+06	23539	572816	238727	92469.8	359247	730383	57559	172332	59152	1.2516e+06	886520	190512	75884	289019	264840	1.94502e+06	630113	10277	77664.3	21650.6	16137.3	39443.7	13250	1000	471882	23856.6	339406	4.04573e+06	199802
748	182456	58768.3	1000	124931	30645	146800	1000	11489.1	217324	318608	404052	126420	1.07965e+07	543415	2.4166e+06	2.50904e+06	3.73268e+06	13444.3	714927	2.44792e+06	193897	473281	45738	338831	675808	743620	18870.4	305933	97092.2	2.25025e+06	782871	326814	24806.1	514515	23813.2	1.43802e+06	573799	8041.45	103451	17361	48371.1	154997	17082.2	1000	313886	293416	375829	4.41618e+06	1000
757a	163542	88313	58393.6	184731	58992.8	6931.84	457959	37217.3	490107	270424	508379	138471	8.59603e+06	589521	1.67161e+06	1.94866e+06	1.73598e+06	21181.5	526620	2.76737e+06	40864.9	375082	65470.9	238628	617026	597696	89827.9	199927	70494.8	1.45501e+06	617839	228662	19656.4	342267	291181	1.20824e+06	521408	11362.6	79598.9	7866.27	32131.6	36876.7	30284	3.46014e+06	136363	310345	482068	4.67882e+06	1000
756a	190743	104067	56997	182173	83002	1000	477729	13269.3	550853	265212	570402	70617.4	8.08738e+06	494253	1.94779e+06	2.1161e+06	2.27832e+06	19345.5	540233	2.1418e+06	18640.4	237761	33110.8	202568	440612	388555	76077.3	295610	24225.2	1.56966e+06	616435	249734	14290.3	387129	308682	1.1737e+06	531249	6081.12	83471.3	25323.8	32587.9	32067	67740.6	1000	367985	222004	458463	4.28373e+06	49099.1
758a	168793	84550	462000	142309	28850.1	40361.2	508031	42394.1	318849	1000	475826	20261.6	6.83475e+06	416773	1.85197e+06	1.71081e+06	983508	101791	1000	1.34944e+06	21424.4	161330	181010	123481	253236	229754	42130.3	297225	15364.2	1.24201e+06	740589	202069	15623.8	302826	140564	1.18701e+06	473770	11678.9	67676.9	19701.8	141285	36138.5	29912.9	1000	489784	147044	376593	4.21297e+06	75550.1
760a	160821	29530.3	67590.2	113163	9949.4	120176	405269	12146.7	227089	190136	449114	107566	8.44026e+06	469804	955796	1.52905e+06	297742	108184	17140.5	1.30647e+06	24458	133514	198396	100378	280814	270270	101690	548309	57602.5	1.39829e+06	677907	223627	43001.4	328825	103074	1.05527e+06	369333	22863.9	62883.5	27078.4	31106.6	26775.2	21486.4	333050	123665	559397	404412	4.05789e+06	55810.8
754	141600	61993.9	352856	119193	21324.2	6695.89	315891	32183.6	270176	250161	358146	134522	9.90322e+06	524690	2.04757e+06	2.22123e+06	2.51516e+06	22820.4	564692	3.04472e+06	34673.9	483392	50270.3	185497	405828	530134	18766.2	460221	58428.9	1.44028e+06	682402	225088	51410.7	17607.8	124426	599897	513876	6446.99	88876.3	31257.8	17659.6	106408	21621.8	1.72495e+06	362217	334686	382978	3.53349e+06	2702.49
761a	199987	73553.9	87289.4	160452	55862.9	1000	331414	33844	162595	254257	466395	130733	1.03499e+07	634404	2.30343e+06	2.3664e+06	2.99434e+06	6332.19	754692	2.89759e+06	58187.6	426630	62317.8	185168	564888	572423	29161.3	256758	15865.9	1.47965e+06	623838	234100	52211.7	362474	77732.8	1.15597e+06	488831	11098.7	107371	22689.8	20695.8	27903.5	40068	1.64796e+06	572128	324486	421301	4.50631e+06	4302.23
762a	132091	62887.4	343776	91584.1	23107.3	27481	559641	50949.2	363290	329282	147143	171209	9.38297e+06	650135	1.84186e+06	2.07282e+06	2.80957e+06	20659.5	721629	2.72783e+06	49373.4	451414	92853.9	210770	449789	618565	67103.9	439949	18036.4	1.42965e+06	725194	11238.8	9184.3	27771.6	164989	1.31457e+06	648341	57817.5	79464.3	34023.5	78702.1	64551.8	52543.7	1000	413791	201586	380119	3.3159e+06	68865.6
755	231813	55017.4	78245.7	150103	45951.3	64441.8	432450	11566.8	267422	248641	537802	93812.8	8.1864e+06	377324	1.94889e+06	1.67515e+06	1.75393e+06	112989	406441	1.98895e+06	53651.5	311296	218165	221402	550095	686863	37403.6	538320	73617.2	1.78408e+06	661232	270311	45941.2	11307.1	128660	1.13892e+06	483853	15826.1	68781.9	12341.3	33982.6	47835.3	31945.2	1000	432715	367648	352315	4.43948e+06	10536.2
764a	142478	56946.5	51289.5	122714	46748.7	359824	361158	59131.6	224145	314705	464160	108619	7.5558e+06	538784	1.64756e+06	1.95905e+06	1.98796e+06	34718.7	575789	2.35814e+06	30040.1	308719	51372.8	171837	484287	515213	15375.3	540589	66403.8	1.42417e+06	749448	164240	68944.9	350284	107507	1.39257e+06	653622	17228.2	78264.4	20169	13989.6	23637.8	58987	2.72211e+06	379842	223711	478653	3.34839e+06	74069
766a	96024.6	57318.4	25082.1	109538	21813.9	3485.03	327786	38026.3	206383	219001	145859	131446	8.06595e+06	572509	1.74572e+06	2.16054e+06	2.35385e+06	17529.8	610498	2.69599e+06	18122.4	319736	209986	201647	641213	638188	27860.8	424854	52668.9	1.16725e+06	172352	192371	29936.1	290719	94990	948899	470176	45022	81811.4	10062.8	20102.3	50967.1	52109.6	9175.72	538627	439717	396821	3.83711e+06	68034.2
756	63635.8	11464.7	1000	45657.2	19294.7	1000	316764	11977.2	220203	224371	139023	115569	5.82086e+06	507058	1.08619e+06	1.50525e+06	1.49137e+06	84935.7	455034	1.8326e+06	24338.1	207524	61548.2	228511	503904	474043	19759.5	398035	51702.2	1.34887e+06	611067	200834	55318	333622	106318	829762	452824	21032	57483.2	25888	16637.8	21676.6	49206.1	121200	391659	377147	336463	688827	8503.61
770	108977	27505.1	242984	54241.5	12072.4	213397	49437	20967.5	328845	179714	369541	144746	8.16571e+06	602362	1.72881e+06	1.75856e+06	1.42142e+06	116475	480553	2.49338e+06	83742.8	431684	68745.4	220953	621907	875166	33595.9	315627	65107	1.02668e+06	23977.4	1000	1000	24864.7	151117	836598	318936	107541	71348.6	8406.15	19822.1	53426.8	10817.4	1000	124678	327056	297615	2.9246e+06	1000
768	264358	113898	102137	223788	70577	44342.6	120170	52086.9	249621	379319	175799	119076	9.04115e+06	555244	1.92458e+06	2.25239e+06	3.59264e+06	19090.4	640800	2.63645e+06	129180	372435	54854.2	356992	703048	760180	110607	551316	90663.5	1.84046e+06	645885	152903	27063.4	418394	114835	1.19214e+06	705946	42890.1	88282.1	14250.3	26475	113852	76597.7	1000	371623	277655	392565	4.44498e+06	10019
776	127333	21972.2	35583.1	55210.5	18532.7	1000	69144.3	26397.6	323898	226321	166226	125345	1.12431e+07	745776	2.23986e+06	2.87457e+06	2.08925e+06	6709.03	621745	2.99445e+06	54241.3	362436	67092.7	260772	686080	616947	26748.8	570316	57686.6	1.11155e+06	722942	1000	46521.5	20119.6	158571	1.13757e+06	455216	11994	117004	8561.58	88506.9	112460	17805.4	1000	292677	534526	389179	4.60037e+06	4843.9
773	163444	60238.1	27848.4	125535	51722.9	1000	97721	23738.9	224120	270240	144292	107066	8.37879e+06	418137	2.1861e+06	1.90511e+06	1.45876e+06	24878.8	469372	2.83212e+06	29619.3	412078	59426.4	166353	659289	772893	38960.4	451941	14020.3	1.3364e+06	741933	219915	62822.8	5512.86	103175	1.3293e+06	558459	11031.7	73561.4	12816.6	77137.9	36321.4	21284.5	1.70791e+06	517984	217803	371260	3.85247e+06	76700
757	104436	1000	12399.8	28769.8	15920.1	252435	35839.9	34187.1	285988	193802	150908	92588.8	5.93805e+06	216429	1.362e+06	1.01215e+06	693198	81525	313635	1.18552e+06	26431.6	172902	40783.1	61449.4	256486	329033	21609.9	332776	17749.7	1.25869e+06	750596	90973	42972.1	12212.5	137330	1.18139e+06	389660	46573.9	36391.2	11729	12981.8	31177.9	15247.3	817993	553068	249596	241592	2.69533e+06	52953
772	112318	80097.5	35949.9	171945	27691.3	126665	109383	51730.9	372160	362255	550633	164605	1.03499e+07	613176	2.31881e+06	2.43098e+06	2.89343e+06	29055.8	767595	2.39497e+06	80952.7	475067	77700.7	323001	616846	907066	37074.4	607009	74189.8	1.72681e+06	701323	258499	60960.4	409711	174030	1.46813e+06	717381	67516.5	100317	9960.06	43565	84462.8	20143.8	1000	682316	156226	420752	4.64981e+06	1521.36
758	132258	50637.9	16297.6	94210.4	39980.1	118529	105187	34024.2	196736	1000	574992	111007	7.06409e+06	560571	1.42265e+06	2.05944e+06	2.13469e+06	30120.7	723333	2.38702e+06	43947.7	263837	26180	208240	607436	486687	16987.1	518812	42376.5	1.66887e+06	543993	80086.8	54371.2	382930	77791.4	881599	490330	24359	77795.8	14161	86149.7	54750.7	16340.4	361065	486147	438707	406626	4.34867e+06	1000
777	140284	60265.9	74685.6	136621	1000	1000	102460	66311.8	259449	5633.34	458645	121530	9.29009e+06	523766	2.13158e+06	1.89927e+06	1.73396e+06	28086.9	1000	2.00858e+06	21193.7	165290	54779.2	207873	474079	364091	18674.8	479385	64425	1.66609e+06	601623	251775	60176.1	412861	119316	1.13107e+06	607446	62824.4	71486.5	44887.1	27953.6	75440.1	18110.2	1.73338e+06	354340	120624	308453	3.1395e+06	67525.4
780	119956	30325.9	33654.3	78297.3	38912.3	56238.8	99788.7	40277.6	282213	228541	173325	48638.7	5.94402e+06	470230	1.04934e+06	1.67579e+06	854803	20471.6	534145	1.87761e+06	36437	318035	42074.6	194838	580886	769044	16819.2	542536	10454.8	1.25238e+06	721310	188341	1668.96	9741.24	126263	1.13331e+06	402340	20068.1	60463.7	17588.5	68724	17284.7	43111.9	393292	810677	394445	455965	4.40985e+06	12999.1
784	212409	90501.3	86960.4	213659	83440.4	2624.28	99865.4	51953.3	387140	337135	616671	121449	9.90322e+06	768732	2.03524e+06	2.75697e+06	2.59397e+06	33586.4	674869	3.04159e+06	21139.9	391817	69263.4	204349	739912	733021	50028	201646	52188.7	1.57479e+06	260480	170895	75023.7	1000	100134	1.34582e+06	772281	22437.6	106936	22757.9	32576.4	16237.9	38102.7	2.93279e+06	548505	322823	519307	4.96198e+06	61662.2
787	128518	19235	29787.1	66236.7	14937.7	231989	76429.8	32585.9	463840	202897	386104	110332	7.94092e+06	419395	1.54418e+06	1.62414e+06	2.05385e+06	103770	407524	2.00658e+06	25551.5	248305	52698.7	199959	464331	515359	38816.3	376701	53600.3	1.5105e+06	675897	103232	37287.6	38451.1	218233	932637	409088	39428.6	60975	26350.6	42452.3	26663.5	55681.4	1000	372550	362981	239553	3.14441e+06	160471
785	235801	193672	709364	396177	94327.1	505614	858338	45899.1	560962	461281	726685	182948	1.31414e+07	1.08392e+06	2.80753e+06	3.62883e+06	4.13521e+06	31362.4	1.20481e+06	4.77239e+06	23586.2	499815	93490.3	322506	906047	668589	208843	667021	29407	1.64432e+06	538795	286735	112368	1000	345505	1.52605e+06	930335	69253	147468	14665.3	27366.2	201219	14660.6	1000	611594	248860	696248	5.61134e+06	81892.7
789	142847	58106.8	356387	122331	19069.3	11874.1	116344	27208.6	466253	223640	183204	15075.4	7.48215e+06	403724	1.87137e+06	1.46514e+06	1.39424e+06	97582.9	1000	1.3638e+06	18914.5	195507	62733.1	184221	490919	589093	33318.7	361256	45597.5	1.34674e+06	803129	230731	46108.6	39654.1	216416	1.21059e+06	470807	5340.6	53490.3	38894.2	13313.4	18219.2	62820.5	1000	437088	233998	324745	2.96713e+06	112554
759	170791	244201	683374	330033	115655	270268	298536	74876.8	926880	380490	592009	33077.7	4.87866e+06	103340	1.05906e+06	1.03519e+06	443900	68329.4	1000	887745	25569.9	140522	36006.7	84265.5	157525	247565	317001	537707	15047.1	4.50518e+06	445586	369139	166509	1.1087e+06	392991	877748	639803	100177	31442.4	12378.8	16087	19853	61891.2	23448.6	268084	19248.2	151501	5.0775e+06	40037
794	170743	95133.5	77329.1	197277	51403.2	71600.8	109527	59160.5	456596	343979	584822	161290	1.26947e+07	588467	2.95453e+06	2.48764e+06	3.31725e+06	16101.7	562936	3.03278e+06	135469	521740	89676.5	273071	546431	719666	85277.4	602240	10932	1.84005e+06	854300	295742	42335.5	483852	214995	1.73398e+06	652497	75867.7	99204.6	10685.6	30011.3	123585	15453.2	1000	338273	261561	301368	4.68763e+06	8283.74
795	199010	27834.7	369912	79048.9	5530.31	1000	88685.4	26346.5	429270	105484	151535	75590.7	6.39533e+06	106966	1.81768e+06	1.14826e+06	300151	79683.9	336169	1.18997e+06	15455.3	232909	32950	93936.2	218237	366885	28647.1	290907	45784.6	1.02608e+06	187934	193793	35940.3	19891.5	213173	1.24608e+06	360373	32006.9	39522.8	14893.8	28428.4	92818.3	12487.4	1000	242724	308047	221669	671354	189979
762	156704	67177.2	61054.5	162216	56601.1	64078.1	119675	69131.4	229092	307019	185129	136471	9.79155e+06	599784	2.48851e+06	2.14348e+06	1.89262e+06	119560	386831	2.57438e+06	16341.9	169264	49710	237585	606330	367810	107278	564971	9055.55	1.64449e+06	785719	210310	94159.8	434010	104837	1.87145e+06	708161	82267.9	86458.3	17397.2	31483.1	44129.8	22750	1000	233504	1000	426408	2.71744e+06	120803
792	211280	71066.9	482513	150924	33836.3	43191	102696	31632.5	384113	337045	451354	98769.6	7.96486e+06	370324	2.33886e+06	1.51897e+06	887713	99817.2	434048	1.15691e+06	21514.3	306099	233941	111763	322754	481889	50570.5	528772	59055.1	1.31823e+06	619172	206060	58396.6	29776.8	193506	1.5516e+06	534200	26973.4	58907.7	18286.3	119871	35759.1	7266.93	1.987e+06	388091	285251	406200	3.80689e+06	180142
798	158008	62918.2	33418.2	125615	19502.1	1000	48892.5	21790.4	337916	223713	440431	100040	6.81571e+06	354589	901684	1.38502e+06	1.19848e+06	86478.5	3189.17	1.19518e+06	17364.8	197131	57387.1	146175	310210	274193	50303.7	434816	59941.5	1.31877e+06	716303	179316	42480.2	17471.6	149734	976419	414564	13017.9	49322.3	15328.9	16270.7	13094	40174.6	1000	380879	456704	344552	3.91748e+06	97151.3
763	174684	51984.8	20831.8	69282.8	46164.1	1000	79114	32395.2	395258	251789	203207	117221	9.36247e+06	701245	2.21227e+06	2.6273e+06	2.05664e+06	13106.8	909680	1.85294e+06	25511.6	443943	60043.8	227276	693309	786618	38206.7	590886	71640	1.21827e+06	808754	216812	52708.8	32254.1	195171	1.40099e+06	471381	46225.7	100922	83779.9	97526.7	97404.4	21171.7	1000	237511	445995	348182	4.59191e+06	1000
799	226331	64381.3	59439	181895	64958.5	526598	134100	59344.4	181513	1000	761662	139364	9.38846e+06	625343	2.0662e+06	2.48878e+06	3.06405e+06	6441.57	710529	3.34672e+06	18486.1	299567	55775.7	226951	667499	513474	82430.3	663772	44812.1	1.72845e+06	888189	276108	86660.6	438609	307576	2.12014e+06	735977	24634.5	93794.5	56506.6	48889.4	34757.2	7542.4	1000	801472	264212	516202	4.41636e+06	105144
804	65348.8	47697.5	253488	94078.9	24980	34246.3	105164	36470.6	315678	310785	180089	105827	1.00149e+07	567860	2.32318e+06	2.46554e+06	3.62129e+06	10460.5	854195	3.94913e+06	59516.4	575402	85757.5	265757	662804	1.01484e+06	15045.9	421919	66825.8	1.53977e+06	635967	248311	57189.6	18734.4	145811	612838	609871	10208.6	90596.3	24940.7	13403.5	33906.7	53494.2	932920	346042	363998	352541	3.83961e+06	15286.8
805	121224	60492.9	58610.9	160599	75988.5	114837	124303	47209.4	240513	307917	500748	101407	5.67217e+06	593856	932051	2.13489e+06	1.08549e+06	86253.9	589658	1.92172e+06	28418	304735	59489.9	151168	611121	686382	13760.2	339943	69025.9	1.2891e+06	734613	233627	67991.1	4517.52	108467	1.39111e+06	643352	11265	70691.7	70863.4	17350.4	70775.8	8559.69	1.04976e+06	594770	557618	665182	5.55847e+06	78226.3
803	114281	52207.4	272385	88005.9	34821.8	16351.8	13724.8	24825.7	372670	194208	141812	118113	6.37339e+06	351228	1.20827e+06	1.42977e+06	1.4067e+06	33513.7	39469	1.75994e+06	32986.1	367223	234301	148003	378678	611138	21950.3	322916	68077	1.23478e+06	103377	202053	27353.7	35935.5	171743	1.23638e+06	362835	34503.6	46384.4	26756.3	24889	60734.1	29077	1000	492668	509423	293004	2.78623e+06	80788.4
808	159595	39482	46725.5	78738.9	23531.8	1000	130310	16363.7	293766	141647	197827	110072	8.90754e+06	586196	1.98605e+06	2.03753e+06	1.91559e+06	19424.1	843572	3.28077e+06	28707.9	368913	20319.7	158627	526087	533428	6825.14	215226	45553.8	1.0845e+06	502412	114141	4912.76	119701	145179	1.31329e+06	378101	18438	79585.5	12549	17494.9	13071.9	30351.8	1000	389461	278889	326801	3.65269e+06	45142.8
764	283294	67744	125382	162602	32486	1000	165643	26295.5	283032	260693	195681	143107	8.46141e+06	645054	1.85511e+06	2.30848e+06	1.90644e+06	120015	202123	2.20661e+06	150450	417422	37839.9	184636	513354	628249	20447.7	498058	5200.63	1.36562e+06	488065	195603	38702.8	106282	136076	1.55662e+06	488598	35622.5	93727.6	48947.7	15796.8	6518.45	5655.82	835770	418589	467991	557300	4.97365e+06	6707.22
810	103120	47574.2	35063.7	92860.7	30647.6	2523.55	110013	29417.5	248069	151114	190555	113978	7.34517e+06	464147	1.45386e+06	1.70543e+06	1.89648e+06	84046.1	361901	1.92128e+06	26986.3	109577	174361	226753	452784	455394	14946.6	242185	47429.6	1.39601e+06	475033	194047	27629.3	285080	115031	738672	420048	10211.4	61956.9	2005.5	24286.2	24215.9	59028.4	1000	480384	392060	343426	3.84439e+06	29919.5
809	122377	53474.6	232334	101604	32393.9	11557.7	113677	30456.5	282196	185877	516696	107291	9.11284e+06	532133	2.10286e+06	2.16073e+06	3.09518e+06	12070.6	403821	2.69396e+06	99035.8	477401	31705.4	275635	611584	854682	59067.5	293764	74517.5	1.5552e+06	514653	209643	25499.2	111918	134326	942988	516187	62117.6	85028	17068.2	33868.9	32949.5	16092.4	251948	549349	300021	352705	2.55652e+06	17872.1
818	154005	39987	75311.3	90943.4	29601.3	382527	353372	33148.9	473503	18495	205754	99866.9	7.79119e+06	175067	1.71287e+06	1.58197e+06	806237	88064.5	93060.4	1.56228e+06	22319	229723	34038.7	91303.5	362033	370540	64353.4	374440	55812	1.30629e+06	566884	194125	35138	150977	247801	1.52759e+06	409953	34422.7	58716.8	43005.6	41477.1	37807.5	52637.2	269366	415240	196881	351269	4.42245e+06	44446.8
816	165041	75689.4	66424.3	153013	53296.9	15555.8	169615	41531.3	265855	375694	683624	128061	1.10734e+07	605170	2.55664e+06	2.64653e+06	3.69785e+06	52434.8	772452	3.26672e+06	22185.7	467779	44455.3	309440	729410	890026	46777.5	481108	48752.1	1.64461e+06	490289	224767	39819.1	114120	128413	993318	781113	19681.8	107279	16056.1	60157.7	113322	39276.2	1.36203e+06	533574	311857	404556	2.55533e+06	38421.7
766	210642	72732.5	119874	187682	39149.6	1000	186328	42043.9	312188	317294	579844	132482	8.8055e+06	664670	1.99638e+06	2.31222e+06	2.51644e+06	6680.32	628259	2.51603e+06	24309.8	326432	49701.4	271772	691425	604567	131678	529022	61416.8	1.67926e+06	712022	233763	63788.7	108870	103049	890179	609300	50060.5	96779.5	17002.8	18275	80808.3	48916.4	1000	533995	459349	547347	4.86082e+06	32469.8
767	191191	60525.9	89733	131291	27794.2	62228.3	198914	30604	324267	244259	208408	111590	6.922e+06	424959	1.56088e+06	1.52766e+06	1.36122e+06	80175	410510	1.95231e+06	26270	230827	162967	180057	514996	466082	41995.1	297887	50709.3	1.45443e+06	499028	202997	37167	133208	162525	1.15665e+06	501712	8586.93	59610.6	50297.1	40803.7	45267.8	7785.77	1000	281965	261754	321159	3.92041e+06	32603.3
819	153596	58947.6	58408.5	105451	64283.2	349661	11269.2	46715	295817	345423	563121	28194.7	1.10734e+07	760642	2.63393e+06	2.99511e+06	2.14803e+06	3296.11	822769	3.40403e+06	34485.3	490626	63909.2	271821	812181	855612	16952.2	732414	1000	1.30083e+06	923373	204333	75918.2	115335	142525	1.81246e+06	706877	72019.8	118039	11650.4	44533.3	147319	38384.9	1000	656551	268116	562402	5.37182e+06	39485.6
822	147046	44176	99767.8	127327	31021.2	59073.2	194555	15269.3	298413	163087	184354	105750	5.50813e+06	430293	1.11493e+06	1.42044e+06	537909	50547	65385.2	1.25841e+06	22322.9	216284	90224.9	76309.7	313081	360382	39476.6	439707	55442.5	1.26602e+06	501612	66395.8	7712.33	121957	141824	1.35032e+06	445933	11108	49165.2	17735.6	12515.4	25507.5	54532.1	1000	183913	444279	507165	4.62116e+06	40525.4
821	186130	64619.4	357396	129671	47733.1	1000	153629	47674	322132	325371	571778	153687	9.68508e+06	617606	2.39648e+06	2.28471e+06	2.93158e+06	13117.1	725552	3.12374e+06	17248.2	446310	61984.4	197583	538783	678913	27396	424027	16968.8	1.36913e+06	949229	192927	67882.1	118339	152296	1.4669e+06	693724	96060.7	89660.1	64758.9	30618.6	72129.1	3870.85	1.63698e+06	417124	164520	341445	2.50928e+06	66071.3
823	101890	222030	760453	378226	126739	251499	907440	86702.3	830365	429967	412286	20421.5	6.55965e+06	186691	1.36808e+06	1.0867e+06	496770	60311.9	463783	823053	20913.1	200330	157299	151775	200775	296221	220645	611545	4647.85	3.45275e+06	544411	458546	129303	1.02482e+06	437219	1.03745e+06	670662	3884.56	41469.3	11015.2	17180	107205	32863.1	5.23764e+06	69431.3	38311.8	164810	5.65214e+06	59206.3
279	108809	50866.5	55789.7	99757	15753.6	57150.2	144926	33499.4	308539	219935	486307	125403	6.91665e+06	483733	1.01345e+06	1.62431e+06	1.49812e+06	76817.7	290567	1.74992e+06	31616	289550	41858.3	159385	431204	499758	22411	298208	64274.2	1.47241e+06	532086	187158	42374.2	108971	158278	925149	399365	22348.4	56880.9	16286.4	37575.4	35505.6	19092.4	1000	318391	360916	387972	3.60769e+06	167506
[truncated: 110 more columns]

## Sheet: Amniotic fluid, positive mode
samples	CE(16:0)+NH4	CE(18:1)+NH4	CE(18:2)+NH4	CE(18:3)+NH4	CE(20:0)+NH4	CE(20:1)+NH4	CE(20:4)+NH4	CE(22:0)+NH4	CE(24:0)+NH4	CE(24:1)+NH4	CE(26:0)+NH4	Cer-NS(d18:1/20:2)+H	Cer-NS(d18:2/18:2)+H	Cer-NS(d18:2/26:0)+H	DG(12:0_14:0)+NH4	DG(20:0_22:1)+NH4	LPC(16:0)+H	LPC(16:0)+Na	LPC(18:0)+H	LPC(18:1)+H	MG(20:2)+NH4	OxTG(14:0_16:0_12:0(CHO))+NH4	OxTG(14:0_16:0_14:0(CHO))+NH4	OxTG(14:0_16:0_22:1(OH))+NH4	OxTG(14:0_16:1_12:0(CHO))+NH4	OxTG(14:0_16:1_14:0(CHO))+NH4	OxTG(14:0_16:1_14:1(CHO))+NH4	OxTG(14:0_16:1_14:1(COOH))+NH4	OxTG(14:1_16:1_12:0(CHO))+NH4	OxTG(16:0_16:0_16:1(OH))+NH4	OxTG(16:0_16:1_24:1(OH))+NH4	OxTG(16:0_18:0_16:1(OH))+NH4	OxTG(16:1_18:0_16:1(OO))+NH4	PC(12:0_16:0)+H	PC(12:0_20:3)+H	PC(14:0_16:0)+H	PC(14:1_16:0)+H	PC(14:1_16:1)+H	PC(14:1_18:1)+H	PC(16:0_16:0)+H	PC(16:0_16:1)+H	PC(16:0_18:1)+H	PC(16:0_18:2)+H	PC(16:0_18:3)+H	PC(14:0_20:3)+H	PC(16:0_18:4)+H	PC(16:0_20:0)+H	PC(16:0_20:1)+H	PC(18:1_18:2)+H
2	162845	1.43304e+06	1000	138164	268077	53047.4	499291	672344	58852.8	175543	25645.4	62955.2	13487.2	193273	1000	161029	1000	13960.3	1000	1000	1000	1000	1000	142952	1000	109186	1000	1000	1000	85273.9	384385	98085.2	1000	152589	55545.7	1000	476419	1000	1.20746e+06	1000	1.28006e+06	9.5191e+06	1000	2.46772e+06	1000	430744	82720.2	124922	1000
548	1.86242e+06	5.49341e+06	5.62462e+06	505208	2.35836e+06	1.91012e+06	624494	3.52336e+06	3.59946e+06	3.15485e+06	676208	273577	530659	778011	1000	2.73584e+06	3.02724e+06	711050	65333.6	577698	351988	5.7195e+06	1.31975e+07	906911	3.89242e+06	1.82856e+07	2.45769e+06	3.03373e+07	656840	5.22788e+06	873711	658316	2.7126e+06	1.7395e+06	1.07336e+07	5.66144e+07	2.69951e+06	511983	6.02945e+06	3.19681e+08	6.27524e+07	6.2505e+07	3.1028e+07	6.09578e+06	3.46506e+07	9.5815e+06	1.25023e+06	219835	1.4788e+07
549	2.04357e+06	1.0911e+07	2.72466e+07	387162	1.37661e+06	1.06109e+06	517394	1.86308e+06	387590	2.7908e+06	364876	161651	318229	662935	1000	2.01054e+06	7.92766e+06	1.29853e+06	3.55524e+06	725525	331938	9.03131e+06	1.78226e+07	2.97508e+06	9.75342e+06	3.48539e+07	8.41582e+06	4.29449e+07	2.9928e+06	6.34419e+06	711415	3.15775e+06	194366	2.70748e+06	2.1405e+06	5.17525e+07	3.14943e+06	1.23121e+06	7.79749e+06	2.97089e+08	5.25944e+07	1.79842e+07	1.18475e+08	2.63526e+07	3.28701e+07	1.61158e+06	3.18634e+06	468898	3.63654e+07
551	549009	3.5969e+07	6.35484e+07	620148	297900	257936	7.18021e+06	576886	105939	409017	47452.4	49606.7	1000	179632	1000	245989	5.84717e+07	8.38405e+06	2.18464e+07	7.56157e+06	31960.9	438480	610548	2.88241e+06	240050	2.93727e+06	480654	1.86768e+07	125298	380810	918269	224568	817526	805919	256678	1000	1.83246e+07	2.96028e+06	1.45987e+06	1000	4.72466e+06	2.82851e+08	1000	1.04042e+07	1000	3.61237e+06	4.96989e+06	1.35462e+07	1.15254e+08
550	1.31575e+06	6.41621e+06	4.11932e+06	444589	2.24145e+06	1.64379e+06	618839	3.16663e+06	3.42873e+06	2.70911e+06	666985	179276	276012	1.00066e+06	1000	1.98403e+06	2.74987e+06	661405	1000	455942	476575	8.94483e+06	1.825e+07	1.07396e+06	8.56366e+06	3.15567e+07	6.25314e+06	4.1252e+07	2.03277e+06	7.62565e+06	980805	3.19699e+06	2.64208e+06	2.66822e+06	2.82618e+06	7.72444e+07	3.79594e+06	331315	8.61314e+06	4.59753e+08	7.74604e+07	7.00925e+07	4.47046e+07	9.05475e+06	4.78772e+07	1.73976e+06	2.48541e+06	277306	713420
40	1.27914e+06	1.74937e+06	1.09589e+06	483527	1.95081e+06	1.18284e+06	539503	3.48799e+06	3.3452e+06	2.08025e+06	551188	287980	453387	925154	1000	1.84756e+06	5.03795e+06	902285	1000	361287	268365	1.0021e+07	2.11021e+07	1.23711e+06	6.80361e+06	2.71755e+07	4.00329e+06	3.88919e+07	1.14771e+06	8.76546e+06	671585	3.58735e+06	3.13995e+06	4.23097e+06	1.98914e+06	8.01353e+07	4.67557e+06	288150	7.29579e+06	2.937e+08	7.20639e+07	6.30176e+07	2.93703e+07	5.82636e+06	3.28701e+07	1.11284e+07	1.52168e+06	372228	1.42172e+07
41	1.45212e+06	3.14962e+06	1.35456e+07	221181	1.19208e+06	703355	1.86093e+06	1.39918e+06	1.242e+06	1.20582e+06	229546	148774	152489	479338	1000	1.11034e+06	1000	288339	1000	109970	218066	1.78082e+06	7.09219e+06	675313	1.24317e+06	9.42909e+06	1.25999e+06	1.25634e+07	183726	3.19401e+06	544388	355354	1000	1.5408e+06	8.29414e+06	4.89931e+07	2.32625e+06	244877	5.40707e+06	3.32107e+08	5.09014e+07	5.64554e+07	3.41363e+07	5.91822e+06	3.59224e+07	8.12389e+06	584409	179333	1.38747e+07
555	2.5593e+06	3.8284e+06	1.97521e+07	649689	508063	3.10402e+06	1.03734e+06	473760	724186	5.04388e+06	747738	139751	206198	908704	1000	3.87479e+06	8.80803e+06	1.29454e+06	2.06846e+06	961483	758613	6.19112e+06	1.8302e+07	3.00559e+06	5.81764e+06	2.755e+07	5.48939e+06	3.92559e+07	2.25951e+06	9.09783e+06	796281	3.94141e+06	1000	8.09809e+06	4.99426e+06	7.6456e+07	1.19205e+07	705743	1.48011e+07	6.20157e+08	1.36187e+08	1.0803e+08	1000	1.37779e+07	3.99921e+07	1.35797e+07	2.33747e+06	747220	3.05429e+07
562	1.92683e+06	2.0994e+06	4.10931e+06	415805	2.57402e+06	2.3507e+06	714903	4.18452e+06	3.99293e+06	3.41481e+06	3.32318e+06	87291.4	227240	981156	1000	2.87573e+06	4.71705e+06	768490	270496	795119	713074	4.45517e+06	1.13555e+07	802564	2.75549e+06	1.39542e+07	1.70367e+06	1.95843e+07	468577	5.71954e+06	711994	184923	2.02688e+06	4.95129e+06	1.56766e+07	9.183e+07	4.7208e+06	446585	7.49751e+06	4.24735e+08	8.90998e+07	8.85486e+07	5.75522e+07	3.08304e+07	4.45706e+07	1.34776e+07	751819	306811	1.00205e+06
556	2.06166e+06	5.11739e+06	3.28675e+07	316008	748519	357338	5.06354e+06	829721	857518	952630	719738	83904	372689	249324	1.31824e+07	754822	2.59763e+06	562460	1000	785683	307539	1.59265e+06	3.79912e+06	660132	254464	4.09429e+06	237898	2.81932e+06	156223	738646	409016	657230	1000	1.55842e+06	1.67175e+06	3.62471e+07	3.1101e+06	1.06651e+06	1.52012e+06	7.71533e+07	5.98955e+07	2.36446e+07	1.09357e+08	8.09465e+06	3.16917e+06	1.18434e+07	391474	344645	2.84879e+07
564	1.27002e+06	1.93751e+06	2.67314e+06	553022	1.50514e+06	1.42301e+06	703247	2.31088e+06	414387	2.99392e+06	381176	378160	646918	924158	1000	2.22901e+06	1.05164e+07	1.3594e+06	2.70321e+06	601304	331940	6.90293e+06	1.82808e+07	1.05804e+06	6.45014e+06	2.8752e+07	5.71987e+06	4.71881e+07	1.58871e+06	9.06157e+06	657583	3.41004e+06	3.13321e+06	4.95526e+06	1.48917e+07	1.05759e+08	4.06693e+06	314861	7.35649e+06	3.73902e+08	6.50803e+07	5.58402e+07	3.31002e+07	7.27412e+06	4.11367e+07	1.58743e+06	3.17835e+06	240805	576948
43	1.82463e+06	3.60387e+06	1.81126e+07	720632	1.75804e+06	1.16527e+06	4.67437e+06	2.24611e+06	2.34959e+06	1.92958e+06	691049	253518	4.37841e+06	1.25559e+06	1000	1.59534e+06	7.14062e+07	6.98719e+06	1.82308e+07	3.70411e+06	278693	265207	840249	352066	1000	1.05121e+06	1000	1000	176148	438197	388924	236299	71170	1.78908e+06	9.61762e+06	5.43806e+07	2.82739e+06	736619	5.52731e+06	2.82404e+08	6.10594e+07	6.5581e+07	1.4036e+07	5.48054e+06	2.80373e+07	8.71782e+06	170419	153530	9.19385e+06
566	2.43897e+06	2.81616e+06	1.01496e+07	685873	507330	3.01101e+06	1.14981e+06	2.40565e+06	903402	5.98218e+06	970850	139968	461889	571101	2.12485e+07	3.77777e+06	3.71283e+06	678314	495857	540257	628818	682715	6.14921e+06	2.69335e+06	6.08196e+06	2.72165e+07	4.74937e+06	3.74512e+07	1.37809e+06	8.57564e+06	668586	3.71244e+06	1.72767e+06	6.38819e+06	4.79884e+06	6.22647e+07	8.97804e+06	1.08351e+06	1.5337e+06	4.16827e+08	1.42535e+08	1.87229e+07	1000	1.26125e+07	2.55458e+06	1.28647e+07	2.86998e+06	566960	1.65005e+07
567	1.48594e+06	3.15815e+06	1.36627e+07	409426	1.29346e+06	522377	2.74105e+06	2.30663e+06	1.7018e+06	1.34577e+06	391597	169088	215729	712291	1000	1.10783e+06	1000	164465	14078.9	243014	187966	751667	2.10014e+06	812843	1000	3.87436e+06	291756	1.79621e+06	165818	934890	512889	621510	465884	1.17162e+06	7.4626e+06	3.51959e+07	1.88791e+06	611797	3.88562e+06	236089579	4.30712e+07	7.73724e+07	1.05006e+08	5.4238e+06	2.56209e+07	7.08967e+06	378331	196600	2.44921e+07
569	3.36664e+06	6.92922e+06	5.23066e+07	114738	475243	215360	6.61532e+06	216820	317779	382975	266724	47235.7	182424	152941	1000	311814	1.02723e+07	879559	5.96982e+06	2.14804e+06	32397.3	1000	1.91562e+06	8.35853e+06	1000	1.33825e+06	1000	4.62285e+06	68605.7	157926	900737	220779	259289	400152	409099	1000	1.51225e+07	3.06117e+06	2.91571e+06	3.06133e+07	1.18564e+07	1.41354e+08	2.06543e+08	5.66656e+06	4.4882e+06	913569	1.10998e+06	1.31129e+06	7.08435e+07
573	2.77399e+06	6.14029e+06	4.44607e+07	290744	2.08672e+06	1.20657e+06	591408	3.1538e+06	3.52552e+06	2.29485e+06	695112	58092.7	279728	718441	1000	1.98995e+06	8.34948e+06	1.07896e+06	1.40371e+06	1.52112e+06	306654	2.39705e+06	3.91228e+06	860563	1.63251e+06	8.01078e+06	1.02257e+06	4.69591e+06	270135	281141	707773	293864	654987	1.23974e+06	1.33188e+06	2.88886e+07	1.67842e+06	1.80829e+06	5.4634e+06	344532243	3.72515e+07	2.00559e+07	1.52252e+08	7.4358e+06	3.66855e+07	1.48405e+06	586226	522500	4.62978e+07
52	2.55799e+06	5.27114e+06	3.46241e+07	363934	1.80878e+06	1.26826e+06	585666	2.23851e+06	2.46147e+06	1.94627e+06	630991	79256.5	216633	724006	1000	1.51926e+06	738961	321683	1000	496506	321310	1.38559e+06	3.37238e+06	806879	1000	6.36791e+06	683790	9.28874e+06	260189	222738	547656	239937	855662	1.16184e+06	903755	2.7706e+07	1.62534e+06	1.24462e+06	4.56489e+06	2.01072e+08	3.3019e+07	1.90305e+07	173388203	1.71516e+07	2.25687e+07	1.16045e+06	579145	372192	4.80103e+07
279	1.44566e+06	3.34429e+06	1.49508e+07	457357	1.01827e+06	802982	619994	1.47842e+06	1.86421e+06	1.88822e+06	1.82306e+06	293556	419078	734774	1000	1.28185e+06	1000	163013	1000	1000	275313	4.82562e+06	1.43105e+07	945425	4.23173e+06	2.15448e+07	3.98935e+06	3.23483e+07	977399	7.60442e+06	3.1784e+06	3.21435e+06	2.62498e+06	1.4746e+06	7.17009e+06	3.44075e+07	1.96458e+06	881648	1.41193e+06	2.15757e+08	44764212	5.9634e+07	5.921e+07	4.86248e+06	2.32045e+07	7.11561e+06	1.75307e+06	187650	1.72996e+07
574	1.37089e+06	2.17174e+06	4.5879e+06	358288	1.33956e+06	761838	1.23556e+06	1.84576e+06	1.69129e+06	1.29977e+06	233225	116951	302731	762535	1000	1.0283e+06	3.37422e+06	650739	1000	480957	539925	5.11709e+06	1.34092e+07	913076	3.36127e+06	1.68935e+07	2.18765e+06	2.50277e+07	566545	4.99282e+06	666574	593521	1.59806e+06	2.64066e+06	2.73626e+06	7.67188e+07	3.13564e+06	192494	7.27218e+06	5.264e+08	7.14291e+07	6.67089e+07	4.61551e+07	8.38001e+06	5.39818e+07	1.72702e+06	853783	268729	2.0268e+07
575	3.05407e+06	6.87023e+06	5.16039e+07	263768	1.46876e+06	1.38656e+06	620547	1.95261e+06	339598	2.44645e+06	382976	87267.6	249437	595182	1000	2.17536e+06	5.28162e+06	775961	1.11152e+06	792500	297264	4.18235e+06	1.00524e+07	493586	4.34634e+06	1.90805e+07	4.25976e+06	2.54231e+07	1.21213e+06	2.80351e+06	515435	413693	406426	1.92806e+06	1.88309e+06	4.54452e+07	2.30129e+06	1.77303e+06	6.12644e+06	2.9257e+08	4.29654e+07	2.01584e+07	1.52459e+08	2.48804e+07	3.23614e+07	1.82795e+06	2.00755e+06	478658	4.75536e+07
331	828444	2.10258e+06	3.92205e+06	285750	535878	275135	1.13778e+06	476827	515076	674255	401765	133281	203253	516511	1000	539199	1000	53757.5	1000	1000	281671	1000	3.96669e+06	461696	696221	5.75111e+06	788263	6.7259e+06	113188	2.25067e+06	534924	960662	530581	1.2348e+06	1.59206e+06	3.49331e+07	1.5648e+06	305795	4.89057e+06	3.55828e+08	4.10608e+07	6.37354e+07	2.02526e+07	5.69642e+06	3.80845e+07	6.89229e+06	444347	190141	1.38747e+07
576	1.79631e+06	5.04183e+06	3.1111e+07	725298	879649	492857	678738	1.3306e+06	1.4674e+06	1.47317e+06	1.35915e+06	709377	2.84898e+06	1.03376e+06	305581	989702	1.78177e+08	1.11874e+07	6.02627e+07	1.40004e+07	317982	7.31283e+06	1.66412e+07	2.71515e+06	6.91829e+06	2.66676e+07	4.91526e+06	3.8292e+07	1.49042e+06	5.71556e+06	2.93346e+06	2.74156e+06	3.42181e+06	1.86017e+06	7.65473e+06	4.72849e+07	1.01031e+07	709088	1.55279e+06	1.14092e+08	3.85212e+07	3.4103e+07	2.14959e+07	4.28586e+06	1.25215e+07	5.45111e+06	2.27641e+06	150442	6.33878e+06
332	2.33124e+06	5.75684e+06	3.95424e+07	422193	1.15081e+06	837615	480668	1.28358e+06	1.40698e+06	1.42352e+06	220397	74168.9	596603	878801	1000	1.21896e+06	8.00807e+06	989435	878057	1.78431e+06	462973	1000	3.35776e+06	327308	1000	5.39834e+06	531363	8.84604e+06	472795	1.15472e+06	426934	506341	91035.1	3.10388e+06	1.91718e+06	7.96097e+07	3.89996e+06	1.60385e+06	7.31611e+06	4.23605e+08	7.13233e+07	9.79817e+07	1.03555e+08	8.50269e+06	4.46978e+07	1.71705e+06	547713	448093	3.02004e+07
578	1.44642e+06	3.21863e+06	1.38969e+07	318637	585861	293850	2.65862e+06	457850	494045	568595	411726	133439	228201	677601	1000	490598	1.26363e+06	440659	21576.1	351106	256418	1.20777e+06	4.97302e+06	444940	408694	6.27483e+06	600867	9.24898e+06	281291	1.78627e+06	829135	599021	423538	1.16629e+06	993097	3.29621e+07	1.55388e+06	659303	1.43122e+06	3.14033e+08	3.8098e+07	7.73724e+07	6.27327e+07	5.906e+06	3.43963e+07	6.55785e+06	451868	197237	2.06105e+07
333	1.9699e+06	4.33743e+06	2.44362e+07	333298	638671	219237	3.77998e+06	596195	547059	563049	474260	87361.5	340743	802404	1000	482112	1000	300960	1000	67806.4	317817	1000	1.23236e+06	302365	1000	1.73807e+06	1000	551178	156247	141157	430977	242722	103001	1.22815e+06	7.679e+06	4.41312e+07	1.42013e+06	721062	3.95345e+06	3.59217e+08	3.75689e+07	6.66063e+07	7.39226e+07	5.39888e+06	3.93562e+07	5.6366e+06	216961	200156	1.74138e+07
579	2.59047e+06	5.53495e+06	3.66148e+07	641798	1.83657e+06	1.80734e+06	790136	2.842e+06	540103	3.429e+06	485820	235355	549334	917157	1000	2.74763e+06	3.22695e+06	566079	1000	1.47838e+06	419855	8.97947e+06	1.75909e+07	2.73841e+06	9.01774e+06	3.27093e+07	7.00685e+06	3.82788e+07	2.1898e+06	5.70159e+06	933128	2.85515e+06	2.63558e+06	1.94609e+06	1.57413e+06	4.34742e+07	3.29165e+06	2.27408e+06	7.27957e+06	3.12903e+08	5.72501e+07	1.86204e+07	1.39611e+08	7.77244e+06	3.32517e+07	1.41685e+06	2.41334e+06	544912	4.07037e+07
583	1.83026e+06	4.70586e+06	2.85347e+07	363575	897278	476886	569844	1.76153e+06	1.57248e+06	1.32871e+06	1.26362e+06	156354	473208	535027	1000	980533	294604	313567	1000	363710	326541	6.4623e+06	1.47619e+07	2.97119e+06	4.99656e+06	2.14204e+07	3.35383e+06	3.48109e+07	980172	5.44449e+06	3.10447e+06	2.71876e+06	2.97318e+06	4.66586e+06	3.2509e+06	7.69816e+07	6.88924e+06	1.28013e+06	1.0862e+07	3.60347e+08	9.51312e+07	1.0157e+08	1.04177e+08	3.20572e+07	4.01193e+07	2.50572e+06	1.63502e+06	429039	2.20035e+06
581	1.35322e+06	2.85424e+06	1.03839e+07	390324	1.5337e+06	942877	607337	2.40467e+06	2.66957e+06	1.80037e+06	406108	254859	190308	842781	1000	1.43782e+06	1000	230358	1000	82231	251493	7.80523e+06	1.82206e+07	968680	6.343e+06	2.71921e+07	4.2511e+06	4.02588e+07	1.2558e+06	8.31907e+06	779118	3.5539e+06	3.19228e+06	999801	6.23969e+06	3.15167e+07	1.41543e+06	861043	3.3202e+06	1.71702e+08	3.55585e+07	5.00983e+07	5.07139e+07	4.55929e+06	1.86261e+07	5.45212e+06	1.78892e+06	160895	1.4103e+07
343	1.87831e+06	1.09615e+07	3.25162e+07	210933	716326	385606	2.99212e+06	718816	615266	727698	495678	121334	168476	444543	1000	645561	1.25161e+06	614222	1000	811236	141871	1.05047e+06	4.04551e+06	384224	203297	5.30639e+06	338866	9.7025e+06	153391	1.48516e+06	453195	622848	139439	1.38255e+06	7.30056e+06	3.26993e+07	1.88786e+06	451569	4.24614e+06	1.81868e+08	3.59817e+07	8.23966e+07	1.31115e+08	5.49891e+06	1.98979e+07	6.27142e+06	427908	166490	2.42638e+07
585	1.87655e+06	2.52328e+06	7.47412e+06	467816	1.41753e+06	1.0491e+06	594800	2.40266e+06	2.60109e+06	1.82927e+06	330380	209988	517869	780320	1000	1.3416e+06	4.87825e+06	956279	138850	659665	365604	1.34748e+07	2.95421e+07	4.92191e+06	1.19141e+07	4.34552e+07	7.80417e+06	5.7642e+07	2.70155e+06	1.34355e+07	780053	5.4345e+06	4.46467e+06	4.23564e+06	2.92718e+06	9.84001e+07	6.28656e+06	642909	1.05994e+07	3.26458e+08	9.77765e+07	7.86028e+07	6.35616e+07	2.77634e+07	3.78301e+07	1.95754e+06	2.94481e+06	280474	1.15468e+06
586	1.29419e+06	2.80428e+06	1.02667e+07	201276	713877	373385	1.43466e+06	638460	734825	648118	692334	93662.4	229662	401324	1000	547562	1000	159339	1000	192829	159644	1.67782e+06	5.99115e+06	506017	362410	5.7397e+06	269660	6.91873e+06	223838	2.3174e+06	1.00671e+06	263492	630573	1.25316e+06	8.04679e+06	3.80868e+07	2.1046e+06	586918	4.59919e+06	3.27588e+08	4.942e+07	7.72699e+07	5.44439e+07	5.62127e+06	3.57952e+07	8.12768e+06	209156	213923	2.04963e+07
587	1.74633e+06	1.04149e+07	2.16257e+07	441705	1.33095e+06	819993	543416	1.67234e+06	1.75448e+06	1.51372e+06	389788	354284	322072	755540	1000	1.24586e+06	2.15587e+06	548800	779396	501465	222617	5.06246e+06	1.5271e+07	828862	3.4837e+06	1.9777e+07	3.15674e+06	2.90233e+07	664723	5.98999e+06	667613	2.48222e+06	2.29036e+06	1.5297e+06	7.99686e+06	4.34742e+07	2.85047e+06	564264	5.03186e+06	2.32701e+08	6.56094e+07	8.2294e+07	9.25724e+07	5.26757e+06	2.53666e+07	9.6575e+06	1.2282e+06	192517	22779613
348	1.67741e+06	8.21667e+06	1.84639e+07	282128	996302	864777	528124	1.10029e+06	250022	1.64965e+06	1.17554e+06	98845.6	511408	740863	1000	1.34049e+06	1000	220344	254145	693928	430580	2.50775e+06	9.96022e+06	676762	1.72644e+06	1.30023e+07	1.87305e+06	1.99118e+07	341819	3.55513e+06	1.82905e+06	407733	1.139e+06	4.19621e+06	2.99536e+06	9.47209e+07	5.74282e+06	786613	1.02492e+07	4.45068e+08	8.7301e+07	9.23424e+07	8.26258e+07	3.44495e+07	4.72413e+07	2.34996e+06	859842	383834	1.36623e+06
590	2.13057e+06	2.29997e+06	5.67359e+06	919494	3.14179e+06	2.3201e+06	747877	3.84775e+06	4.04861e+06	3.0402e+06	1.25355e+06	836401	5.15201e+06	1.42561e+06	1000	2.46449e+06	1.37909e+08	1.33043e+07	1.56697e+07	2.51558e+06	414714	547190	1.21346e+06	567063	201427	3.35881e+06	88346.8	1000	149788	677034	578085	1.09688e+06	137092	1.61687e+06	1.2647e+06	2.236e+06	6.13599e+06	451733	1.92001e+06	1000	8.72567e+06	2.01584e+07	1000	3.40096e+06	1000	1.29815e+06	461318	205192	48266.3
349	597807	3.09193e+06	2.56889e+06	176226	418507	269550	1.2742e+06	302884	346893	375226	297073	92879.5	175287	414375	1000	316938	1000	305257	1000	50759.7	103592	1.00686e+06	3.78239e+06	362978	242537	4.48829e+06	262987	4.32543e+06	187280	1.60853e+06	726107	554963	207391	1.06458e+06	1.08498e+06	3.72983e+07	1.59171e+06	467823	4.28391e+06	2.58682e+08	3.77806e+07	6.07619e+07	1.07205e+07	5.70746e+06	2.56209e+07	1.06592e+06	217907	133089	1.12488e+07
596	1.28067e+06	5.8176e+06	1.44824e+07	176301	444718	316209	2.25987e+06	724372	230755	395662	197834	72478	157848	295765	1000	272087	1000	39760.9	1000	233050	26356.3	1000	797956	335980	1000	1.94839e+06	1000	1000	13283.8	284786	390091	234462	1000	381528	901114	1.77786e+06	3.90181e+06	823396	1.87476e+06	5.4674e+07	1.29145e+07	4.83553e+07	2.29465e+07	3.29985e+06	3.96792e+06	2.0839e+06	235606	161227	1.09063e+07
593	3.46615e+06	1.48957e+07	4.51633e+07	188286	421442	456513	7.65592e+06	681740	271199	557703	215204	74476.9	242216	312169	1000	321584	1.00612e+06	320106	652022	909164	113706	537413	1.95191e+06	583913	117457	3.72182e+06	279333	7.04278e+06	276158	287477	904742	580452	262933	1.01253e+06	1.43845e+06	2.27128e+07	1.37162e+06	1.58965e+06	5.23192e+06	2.73367e+08	2.9633e+07	2.22091e+07	2.10688e+08	6.72223e+06	3.22342e+07	1.5884e+06	557137	450324	5.16636e+07
588	2.79421e+06	6.65439e+06	4.89106e+07	367566	2.65462e+06	2.17339e+06	978067	3.68863e+06	626309	4.19302e+06	654943	187145	1.36483e+06	1.74583e+06	1000	2.94823e+06	4.57463e+06	768992	2.26736e+06	3.72404e+06	865156	6.10764e+06	1.48466e+07	2.7267e+06	4.47142e+06	2.23716e+07	3.42481e+06	3.38963e+07	925824	5.11801e+06	1.53898e+06	297193	2.72995e+06	2.18843e+06	3.05466e+06	2.59978e+07	1.97093e+07	4.09959e+06	2.89488e+06	2.30442e+08	3.03737e+07	1.35202e+08	8.05536e+07	8.16926e+06	1.90076e+07	1.62345e+06	1.59544e+06	1.73067e+06	5.07503e+07
350	1.68921e+06	2.62917e+06	9.09572e+06	225318	411911	2.20369e+06	982648	1.527e+06	790448	5.07258e+06	681847	294420	1.84246e+06	281997	3.99253e+07	3.1542e+06	3.74144e+06	284305	1.09429e+06	104971	1.02057e+06	380601	4.71486e+06	1.93349e+06	4.52317e+06	2.08229e+07	3.8862e+06	2.70904e+07	1.35707e+06	2.67047e+06	4.78232e+06	2.75259e+06	2.10685e+06	2.00783e+06	1.19591e+06	3.12539e+07	3.57827e+06	969246	2.85685e+06	5.67073e+07	5.70385e+07	1.54498e+07	5.21645e+07	6.83561e+06	1000	5.37856e+06	3.05236e+06	296774	2.1638e+07
598	2.36952e+06	1.13494e+07	2.74808e+07	124409	350362	452374	5.14902e+06	733318	229367	486766	179407	65739.2	134721	212646	1000	286349	1000	11534.6	1000	1000	1000	1000	408238	759351	1000	1.71056e+06	1000	243629	1000	491361	597816	307363	316081	344875	1.80505e+06	1.57612e+06	5.01123e+06	463471	2.0552e+06	6.95849e+07	1.43959e+07	1.54336e+07	118060452	3.50131e+06	6.38021e+06	2.62372e+06	268109	169579	2.23229e+07
599	1.04438e+06	853215	4.06819e+06	188529	644036	585314	392529	653206	995105	628413	546141	77149.1	142567	258941	1000	562657	1000	1000	1000	1.14289e+06	47504.4	978578	2.79249e+06	536626	872762	4.91684e+06	240535	5.09779e+06	298272	1.17742e+06	533178	620900	694416	387448	1.74133e+06	8.59654e+06	1.61883e+06	536122	1.39179e+06	8.41079e+07	1.84392e+07	7.70481e+06	1000	234755	7.06382e+06	2.81147e+06	299313	131865	7.0911e+06
601	1.75929e+06	5.00845e+06	2.20356e+07	242564	1.01608e+06	876434	233322	1.08199e+06	404572	1.33458e+06	1.01792e+06	125524	205721	741690	1000	939490	1000	1000	1000	1000	253600	2.62193e+06	8.37248e+06	792944	2.58168e+06	1.48729e+07	3.15695e+06	1.90854e+07	668871	4.16983e+06	220759	682206	597485	1.40065e+06	6.7016e+06	3.27205e+07	1.3903e+06	715070	4.15745e+06	2.12239e+08	4.00226e+07	4.96696e+07	6.21509e+07	5.28466e+06	2.15639e+07	7.93308e+06	1.30123e+06	38401.6	1.65925e+07
610	3.50327e+06	1.24899e+07	5.39861e+07	147982	227257	217716	5.04862e+06	621116	490759	90209	142551	38424.1	241513	193849	1000	100460	1.0224e+07	2.44396e+06	2.08263e+06	535755	107936	389800	2.87812e+06	2.62031e+06	527252	3.03442e+06	148814	4.14359e+06	217090	1000	685651	490012	1.48983e+06	491926	534322	8.41309e+06	1.4799e+07	1.33443e+06	1.88463e+06	102412275	1.12113e+07	2.36996e+07	3.0206e+08	5.4554e+06	1.3102e+07	749392	557119	331983	6.06091e+07
447	1.535e+06	3.69311e+06	2.12318e+07	150217	254214	235891	2.30016e+06	413394	647992	168211	246494	209591	197656	386939	1000	132701	1000	1000	1000	1000	96993.8	3.65875e+06	9.9092e+06	760125	2.52089e+06	1.34959e+07	1.93773e+06	1.81521e+07	488648	2.9659e+06	183346	731992	453866	2.99686e+06	2.0063e+06	5.02402e+07	6.76787e+06	778473	9.4526e+06	1.88443e+08	6.57219e+07	6.26107e+07	5.37331e+07	8.17953e+06	1.95446e+07	1.62703e+06	888778	98916.7	1.96963e+07
603	2.56614e+06	7.47321e+06	3.23844e+07	740315	1.24661e+06	824124	222313	1.96244e+06	2.19906e+06	1.29246e+06	179984	561088	3.77754e+06	661019	108016	966852	9.08303e+07	1.25402e+07	2.32443e+07	5.30452e+06	75373.3	3.26036e+06	8.05677e+06	601395	2.50861e+06	1.40798e+07	2.13115e+06	1.87962e+07	503011	2.69827e+06	297526	607395	672537	896418	754705	1.85947e+07	629137	1.22023e+06	2.30755e+06	8.95992e+07	2.56671e+07	9.32772e+06	8.84568e+07	2.82543e+06	9.3518e+06	437350	1.05854e+06	104428	2.28941e+07
614	1.20985e+06	2.13477e+06	6.40699e+06	298484	1.53956e+06	1.02731e+06	936031	2.22699e+06	2.73513e+06	1.90726e+06	229303	51056.8	638994	697210	1000	1.37911e+06	929502	397269	1000	728019	447796	2.03598e+06	6.70045e+06	230341	1.40683e+06	8.2342e+06	630774	1.18293e+07	667713	3.52091e+06	457258	1.75452e+06	1.96712e+06	3.91758e+06	2.91896e+06	9.33514e+07	4.77861e+06	578377	7.8482e+06	5.81073e+08	8.45948e+07	8.05696e+07	4.78142e+07	1.10663e+07	5.58923e+07	1.93005e+06	410019	322457	5.00775e+06
486	1.64384e+06	4.68852e+06	1.09835e+07	574703	2.08294e+06	1.81446e+06	402142	2.9301e+06	759829	3.58511e+06	439082	157940	415658	889348	1000	2.52479e+06	1.38792e+07	3.47709e+06	1000	1.84937e+06	848440	8.79458e+06	2.24498e+07	244129	6.29987e+06	2.98835e+07	5.35528e+06	3.94216e+07	1.41253e+06	9.95069e+06	1.4134e+06	408888	366252	5.52142e+06	2.58779e+06	1.02524e+08	8.83878e+06	674059	8.02762e+06	4.14502e+08	9.84483e+07	8.03055e+07	5.66267e+07	1.39102e+07	4.30071e+07	2.37469e+06	2.15181e+06	372767	5.11695e+06
613	2.21054e+06	6.42438e+06	2.39446e+07	663599	2.40156e+06	2.01712e+06	607256	3.70925e+06	862170	4.21006e+06	3.39662e+06	154883	681878	1.28094e+06	1000	2.56834e+06	2.62634e+06	763181	1000	2.77572e+06	867935	1.08039e+07	2.46551e+07	3.57978e+06	9.16307e+06	3.85328e+07	7.8411e+06	4.93577e+07	2.135e+06	9.60508e+06	2.27787e+06	487491	482519	4.72412e+06	2.93615e+06	7.2713e+07	6.41346e+06	1.04673e+06	6.92533e+06	3.90707e+08	7.43552e+07	7.50235e+07	8.9246e+07	1.68896e+07	3.81992e+07	2.87244e+06	3.08918e+06	507194	3.54971e+07
477	1.80929e+06	3.79623e+06	2.19351e+07	173422	246572	213398	2.66655e+06	314722	553654	114868	283987	80224.5	237746	231829	1000	120907	1000	1000	1000	1000	47566.9	613360	1.44443e+06	391044	681235	4.55042e+06	106524	4.52474e+06	255020	463487	333710	390733	444822	375458	1.84611e+06	8.22964e+06	4.57389e+06	675656	1.01238e+06	7.77013e+07	1.24159e+07	3.78731e+07	2.72957e+07	1000	6.68683e+06	2.53e+06	346423	179215	1.33007e+07
615	1.29349e+06	1.578e+06	4.24113e+06	266695	1.54805e+06	1.30432e+06	553021	2.21036e+06	2.37712e+06	1.76263e+06	260367	111622	142208	623875	1000	1.59652e+06	1000	1000	1000	1000	135081	1.77239e+06	4.82104e+06	969163	1.46184e+06	7.92966e+06	924342	1.04835e+07	317140	2.04682e+06	262114	426600	1.44655e+06	1.09873e+06	4.43151e+06	2.64831e+07	1000	542387	2.50888e+06	1.11564e+08	3.89183e+07	3.73449e+07	2.8312e+06	2.40577e+06	1.01211e+07	6.07029e+06	433223	90476.2	9.54301e+06
618	969039	1.60424e+06	8.48428e+06	247577	404968	319963	189784	746922	1.15858e+06	749166	541403	325594	364438	385133	1000	470183	1000	1000	1000	1000	202952	3.80292e+06	1.134e+07	1.98465e+06	2.96548e+06	1.62747e+07	2.14844e+06	2.70901e+07	662647	6.038e+06	3.41537e+06	2.74522e+06	2.97439e+06	2.37045e+06	1.19787e+07	6.14307e+07	3.60598e+06	783791	6.64879e+06	2.82711e+08	6.35133e+07	7.85448e+07	5.39961e+07	1.09308e+07	3.09874e+07	1.27294e+07	1.29847e+06	165067	2.07308e+07
516	2.37072e+06	4.47655e+06	8.73717e+06	553715	2.783e+06	2.53776e+06	394321	4.23437e+06	4.43463e+06	3.53335e+06	412315	346753	268294	849222	1000	3.04681e+06	1000	1000	1000	682417	395173	4.11749e+06	1.11e+07	2.03632e+06	3.32095e+06	1.60496e+07	2.13677e+06	1.40779e+07	652183	4.6068e+06	1.11131e+06	347577	337899	2.19779e+06	1.11423e+07	5.95962e+07	3.40369e+06	1.02232e+06	6.03498e+06	267151955	6.76292e+07	6.33149e+07	3.76865e+07	7.38951e+06	2.88719e+07	1.27294e+07	1.10608e+06	107055	1.65925e+07
622	1.35842e+06	3.01053e+07	7.08657e+07	264112	950222	753238	279869	1.55902e+06	478212	1.70207e+06	565890	53574.2	50805	221481	1000	1.30419e+06	118083772	2.40798e+06	3.3574e+07	1.15016e+07	249061	1.8647e+06	1.42924e+06	8.10883e+06	2.17253e+06	7.23568e+06	1.38984e+06	1.85791e+07	834357	252577	1.51185e+06	638668	1.56555e+06	1.16678e+06	456514	1.31378e+06	2.03767e+07	4.63329e+06	7.15579e+06	8.0447e+07	1.30183e+07	2.20896e+08	5.63636e+07	1.48582e+07	5.91199e+06	1.81775e+06	3.07518e+06	8.36767e+06	1.03873e+08
624	2.84244e+06	8.9668e+06	3.52981e+07	494029	2.97234e+06	3.17121e+06	2.29501e+06	4.28983e+06	1.31579e+06	6.63677e+06	901511	122088	415505	870665	1000	4.36288e+06	1.43372e+07	2.80766e+06	1.17296e+06	2.27044e+06	701605	8.55346e+06	1.99128e+07	2.59262e+06	6.76319e+06	3.02726e+07	5.73205e+06	4.65527e+07	1.45835e+06	7.20568e+06	1.51209e+06	544177	561669	3.21999e+06	2.69635e+06	6.66591e+07	4.789e+06	1.01227e+06	7.43976e+06	4.17248e+08	6.6525e+07	6.94773e+07	1.03583e+08	1.14725e+07	4.34879e+07	2.05318e+06	2.56936e+06	684170	3.26755e+07
542	427452	1.10564e+06	3.2965e+06	564855	862439	529201	216905	1.63365e+06	477217	1.7495e+06	1.04707e+06	926655	359262	461373	1000	1.03671e+06	1000	1000	1000	208236	278690	1.86e+07	3.01086e+07	5.38975e+06	1.93022e+07	5.89511e+07	1.0396e+07	7.74733e+07	4.83317e+06	1.39149e+07	445757	7.47378e+06	7.36018e+06	660877	797449	2.30893e+07	1000	809713	1000	4.15501e+07	2.71729e+07	1.4456e+07	4.01497e+06	2.8357e+06	6.36534e+06	5.00784e+06	5.19075e+06	162351	1.80385e+06
627	2.3358e+06	7.85844e+06	3.22839e+07	148532	713418	199090	3.50008e+06	604642	919366	723997	421461	70135.2	193658	191704	1000	778947	1000	1000	1000	364486	60346.7	660809	1.62148e+06	557814	793532	6.23478e+06	400373	6.53736e+06	305782	58483.5	283096	451808	1.32637e+06	358821	1.39887e+06	6.80729e+06	6.63441e+06	793438	582111	4.96041e+07	1.04082e+07	9.53109e+06	9.64801e+07	1.00902e+06	6.01687e+06	2.77971e+06	378725	125568	2.50573e+07
625	1.69795e+06	5.52978e+06	2.0428e+07	555622	1.63278e+06	1.17601e+06	1.78388e+06	2.71271e+06	2.90707e+06	2.22611e+06	304117	106354	621295	1.14997e+06	1000	1.58969e+06	1.52036e+06	630998	808708	633337	679164	7.64368e+06	1.83416e+07	2.67902e+06	6.74608e+06	2.92803e+07	5.17811e+06	3.92408e+07	1.72531e+06	7.50538e+06	787467	3.6417e+06	427201	6.01134e+06	3.20885e+06	9.97722e+07	1.16288e+07	863856	1.10295e+07	4.09926e+08	1.13506e+08	8.97251e+07	7.96443e+07	1.86502e+07	4.30071e+07	3.02821e+06	2.38396e+06	486864	4.62075e+06
543	1.80132e+06	4.80128e+06	2.28394e+07	319636	1.02103e+06	151148	2.28638e+06	1.17192e+06	434465	1.50288e+06	788069	184848	797770	658173	1000	1.35718e+06	1.23738e+07	2.0222e+06	1.99121e+06	786472	183684	829614	2.46637e+06	541328	731018	4.82894e+06	406671	6.34778e+06	299652	1.19311e+06	261871	788878	339708	1.14144e+06	6.85342e+06	3.42798e+07	3.53348e+06	806980	3.21053e+06	2.51593e+08	3.88179e+07	6.43713e+07	5.41276e+07	5.06131e+06	2.78141e+07	8.07274e+06	269500	123922	1.87557e+07
630	2.06623e+06	6.82922e+06	3.03749e+07	449841	1.41509e+06	1.15822e+06	2.176e+06	1.94847e+06	555126	2.18672e+06	250239	133142	1.00936e+06	756707	1000	1.49837e+06	79149.6	1.42843e+06	169393	780545	547738	7.27584e+06	1.88681e+07	394427	6.2066e+06	2.89205e+07	6.01892e+06	4.15224e+07	1.46461e+06	7.93629e+06	510398	3.75464e+06	349296	4.53055e+06	3.70817e+06	7.72993e+07	1.23344e+07	696919	1.14527e+07	413587226	115514189	9.23662e+07	9.02982e+07	1.75668e+07	4.26225e+07	3.20633e+06	2.45737e+06	567173	3.26755e+07
629	2.16887e+06	5.98903e+06	3.11787e+07	355455	938721	142854	2.93302e+06	1.54998e+06	444319	1.48625e+06	1.0369e+06	235798	291848	691609	1000	1.26293e+06	1000	1000	1000	1000	215222	5.20626e+06	1.31169e+07	649137	4.26769e+06	2.08583e+07	3.85746e+06	3.22881e+07	1.02328e+06	5.13402e+06	2.89517e+06	2.54526e+06	670728	1.38936e+06	862954	2.95101e+07	2.04519e+06	1.40723e+06	3.44571e+06	8.41079e+07	3.76133e+07	5.67124e+07	1.0766e+08	7.49562e+06	9.44795e+06	863363	2.04346e+06	105785	2.6468e+07
632	1.02353e+06	2.7344e+07	5.95122e+07	329333	544561	740192	5.57776e+06	600571	769866	1.06662e+06	537439	42720	40624.5	158878	1000	925117	5.69351e+07	2.86425e+06	2.37138e+07	7.34893e+06	271740	1.07305e+06	916738	3.90091e+06	1.40854e+06	5.79405e+06	1.51643e+06	1.61788e+07	688531	239236	1.10848e+06	469366	3.15999e+06	785317	512030	30381.8	625166	4.72057e+06	4.62095e+06	4.1001e+07	8.50082e+06	2.61392e+08	3.05839e+07	1.12017e+07	2.68479e+06	1.0166e+06	3.01231e+06	1.09357e+07	1.06695e+08
570	2.4756e+06	1.04903e+07	3.47957e+07	153270	93305.6	121229	2.71337e+06	558155	318740	56274.6	33065.5	96878.5	105795	101790	1000	1000	1000	558695	1000	284680	21155.2	448459	281900	1.05177e+06	543872	4.60487e+06	201836	6.24198e+06	222635	1000	418108	272216	1.47677e+06	258801	985073	4.77998e+06	8.707e+06	992723	978111	3.4869e+07	7.89849e+06	1.53364e+07	1.96837e+08	3.1534e+06	4.57754e+06	1.84062e+06	378202	160843	3.75662e+07
631a	1.35395e+06	1.65489e+06	5.89064e+06	254233	929098	824517	525805	921561	1.23344e+06	785921	650804	120415	258184	657473	1000	796010	1000	1000	1000	1000	164249	1.23755e+06	4.30006e+06	787290	980589	6.16551e+06	485822	9.31924e+06	308983	1.87109e+06	815062	887733	1.1235e+06	785303	878547	2.77673e+07	1.23923e+06	654317	3.26411e+06	2.66237e+08	3.59067e+07	4.65885e+07	2.22975e+07	4.27192e+06	2.62756e+07	6.0189e+06	292156	179681	1.35829e+07
637	2.13553e+06	4.9719e+06	9.48472e+06	428563	1.9221e+06	1.75846e+06	437015	2.64242e+06	3.33755e+06	3.00267e+06	335528	282064	235010	880342	1000	2.32902e+06	1000	296455	1000	237040	611860	6.71522e+06	1.86483e+07	2.30723e+06	4.90138e+06	2.49934e+07	4.42834e+06	3.95647e+07	987101	8.24504e+06	597125	3.1941e+06	3.28007e+06	2.66055e+06	2.63132e+06	5.75782e+07	5.17837e+06	472644	9.86576e+06	4.09926e+08	9.03169e+07	7.15901e+07	4.75512e+07	1.18788e+07	4.31033e+07	2.00806e+06	1.79609e+06	258100	2.18595e+07
635	2.35391e+06	6.68621e+06	3.03749e+07	395869	2.0171e+06	283381	4.85012e+06	2.69793e+06	3.25132e+06	2.95705e+06	278976	107160	355524	889988	1000	2.49718e+06	297236	457626	1000	404050	423639	1.74974e+06	4.68336e+06	381948	638299	7.12957e+06	87357	7.29349e+06	404167	167734	1.11678e+06	1.22504e+06	394168	1.87723e+06	8.53753e+06	5.15243e+07	2.17074e+06	1.40022e+06	6.12635e+06	3.95283e+08	5.70885e+07	7.32628e+07	8.46425e+07	9.75093e+06	4.08916e+07	1.15702e+07	347238	220807	2.50573e+07
604	2.14377e+06	4.57327e+06	1.21892e+07	604182	2.21845e+06	2.21037e+06	423061	2.72891e+06	708126	3.23952e+06	407637	135767	378180	1.21115e+06	1000	2.60282e+06	1000	1000	1000	178610	620024	2.76684e+06	9.72313e+06	1.82942e+06	1.82734e+06	1.20442e+07	1.79959e+06	1.1824e+07	458104	5.12401e+06	1.07647e+06	350522	679539	3.68163e+06	1.20832e+07	8.52795e+07	5.93933e+06	483383	7.50014e+06	4.62094e+08	9.74444e+07	9.23662e+07	6.34662e+07	1.09308e+07	4.63727e+07	1.47547e+07	744853	457809	5.086e+06
617	1.74911e+06	4.20338e+06	1.22897e+07	882176	1.24418e+06	1.44372e+06	304907	1.69261e+06	679926	2.54022e+06	1.17852e+06	365682	425554	1.25233e+06	1000	2.03883e+06	2.35723e+06	928060	863364	347745	748428	1.91354e+06	8.08225e+06	1.94619e+06	1.62629e+06	1.05601e+07	1.78016e+06	1.63017e+07	398127	4.83784e+06	420165	2.43464e+06	330785	4.98779e+06	9.21128e+06	5.87707e+07	2.31715e+06	1.13627e+06	6.36889e+06	4.34637e+08	4.97602e+07	7.56397e+07	5.74159e+07	1.13371e+07	4.44495e+07	1.28293e+06	762936	217276	2.30822e+07
640	3.69542e+06	1.28708e+07	5.59956e+07	503207	1.61516e+06	314091	9.07953e+06	1.83436e+06	2.10917e+06	1.45474e+06	203797	100075	544689	374627	4.39284e+07	1.14363e+06	1000	1.45077e+06	1.00916e+06	5.67143e+06	302059	1.6518e+06	3.65006e+06	1.42161e+06	1.36657e+06	7.14984e+06	921896	704559	327207	168690	637779	445625	924465	2.65492e+06	1.89692e+06	4.14345e+07	5.35351e+06	1.90234e+06	6.20574e+06	1.38106e+08	6.25094e+07	3.44398e+07	1.81053e+08	7.9535e+06	3.51324e+06	2.16876e+06	603090	508243	4.87585e+07
638	1.21039e+06	2.16438e+06	8.9608e+06	303827	990292	970514	833390	1.4769e+06	467908	1.66042e+06	1.18897e+06	233408	224994	782406	1000	1.21748e+06	1000	1000	1000	1000	272205	4.95521e+06	1.42322e+07	2.31002e+06	4.07975e+06	2.05546e+07	4.10348e+06	3.04421e+07	964521	6.60337e+06	3.74545e+06	3.13626e+06	325592	1.68494e+06	9.96322e+06	5.11574e+07	1.34809e+06	934681	4.72498e+06	2.35119e+08	5.27718e+07	6.0938e+07	4.41314e+07	7.61846e+06	2.54102e+07	1.06529e+07	1.80317e+06	88521	1.71569e+07
628	1.43659e+06	2.64243e+06	9.15441e+06	437694	1.65931e+06	1.45934e+06	278361	2.36474e+06	2.87564e+06	2.48106e+06	227493	123655	464378	720010	1000	2.1309e+06	1000	923237	414840	1.11914e+06	380585	840310	3.18157e+06	914076	578439	4.33924e+06	57414.7	4.73297e+06	353505	1.75391e+06	613432	1.11027e+06	424869	3.2948e+06	1.72327e+06	7.44558e+07	6.06724e+06	577479	9.09566e+06	4.25485e+08	9.30273e+07	9.85285e+07	5.5706e+07	1.18788e+07	4.35841e+07	1.74947e+06	233501	289584	4.71793e+06
641	1.32731e+06	2.55106e+06	1.65096e+07	260092	426574	125844	1.58284e+06	441028	699561	318862	284153	53923.7	588497	491335	1000	287240	1000	193064	1000	208160	529125	606520	2.42864e+06	465290	496462	3.41936e+06	170309	4.43582e+06	456263	981060	389034	578972	367001	2.80149e+06	9.89626e+06	6.50998e+07	4.88799e+06	663981	8.76955e+06	5.5087e+08	7.81699e+07	5.94414e+07	7.26733e+07	1.20143e+07	5.58923e+07	1.79147e+06	259965	327133	2.66561e+07
642	1.19573e+06	2.35429e+06	4.47828e+06	558160	539189	893755	257564	603069	412044	1.30324e+06	607326	162806	222073	1.58653e+06	1000	998741	1000	1000	1000	1000	245522	4.14697e+06	1.45428e+07	1.67388e+06	3.14314e+06	1.86145e+07	3.144e+06	2.87904e+07	703297	7.25575e+06	3.2728e+06	2.74754e+06	2.47669e+06	1.14612e+06	2.6224e+06	1.55677e+07	796909	492314	1.65199e+06	8.59383e+07	2.07481e+07	2.63406e+07	1.51591e+06	584655	8.31663e+06	3.15515e+06	1.22602e+06	82205.2	8.20445e+06
631	1.91382e+06	2.93636e+06	9.6971e+06	249657	1.48835e+06	1.27437e+06	242156	1.65913e+06	2.36078e+06	1.72646e+06	1.31801e+06	121672	233814	813754	1000	1.41523e+06	599465	617230	1000	47541.8	171440	4.292e+06	1.27744e+07	1.14014e+06	3.36905e+06	1.86483e+07	3.3966e+06	2.79794e+07	737382	4.65491e+06	1.38992e+06	727053	1.76242e+06	1.20808e+06	5.65764e+06	3.1528e+07	788901	641862	2.80207e+06	1.83867e+08	3.70109e+07	3.66406e+07	1.55895e+07	4.11334e+06	1.87753e+07	6.42499e+06	1.44823e+06	40758.6	1.11375e+07
646	2.63388e+06	8.68416e+06	2.57531e+07	604579	227170	2.5531e+06	829012	2.59032e+06	975233	4.4742e+06	254790	124533	3.32998e+06	797786	1000	3.32666e+06	2.3269e+07	4.02818e+06	7.42333e+06	1.42262e+06	446870	3.69422e+06	1.09777e+07	723280	4.0736e+06	2.15322e+07	5.92502e+06	3.28997e+07	1.26871e+06	5.46896e+06	388820	2.72957e+06	1.76545e+06	7.34273e+06	2.86647e+06	1.03441e+08	1.25938e+07	1.27549e+06	1.32512e+07	4.10842e+08	1.1953e+08	1.07332e+08	7.3857e+07	1.53999e+07	3.98339e+07	2.70445e+06	2.96281e+06	727250	3.38982e+07
647	993256	1.40663e+06	8.13062e+06	306186	457630	373060	947205	469487	689434	359275	238733	77468.7	227539	920941	1000	347355	1000	1000	1000	1000	255710	545229	1.22922e+06	398996	528299	3.6849e+06	193357	4.20611e+06	283049	523661	385909	457190	357336	726479	757431	2.44651e+07	1.63604e+06	656224	2.36401e+06	217730051	2.87791e+07	7.6456e+06	1.67733e+07	2.73715e+06	2.041e+07	5.44321e+06	325334	30678.3	1.06205e+07
656	1.16884e+06	1.88394e+06	1.03974e+07	256056	436941	419794	821626	426580	848023	500612	435143	252961	239535	533646	1000	370103	1000	1000	1000	1000	240346	1.61312e+06	5.31179e+06	908447	1.33529e+06	8.00295e+06	1.00508e+06	1.1609e+07	275785	2.63901e+06	1.32307e+06	1.27275e+06	549222	1.67852e+06	1.50827e+06	4.37276e+07	1.67791e+06	668122	5.6825e+06	267151955	4.90575e+07	5.46876e+07	3.70288e+07	7.65518e+06	2.73334e+07	9.89777e+06	456050	137796	1.78152e+07
645	2.45284e+06	5.85637e+06	2.47484e+07	562058	2.36279e+06	1.9072e+06	2.99867e+06	4.16926e+06	4.66942e+06	3.39371e+06	368856	308942	5.40712e+06	1.15986e+06	1.16027e+06	2.96831e+06	1.57933e+08	4.94531e+06	4.62512e+07	3.66515e+06	313766	2.57805e+06	6.28874e+06	486374	2.05957e+06	1.05271e+07	229511	1.12992e+07	422519	308013	1.27895e+06	420132	669381	2.8708e+06	1.21878e+07	7.50062e+07	2.81545e+06	999854	4.45938e+06	3.94368e+08	6.18067e+07	7.69602e+07	5.62321e+07	7.77266e+06	3.98339e+07	9.6975e+06	863435	204418	3.74452e+06
685	1.19531e+06	1.95952e+06	9.83397e+06	254892	1.03303e+06	865203	804406	1.27441e+06	475654	1.62512e+06	1.00178e+06	99707	232353	737643	1000	1.2608e+06	1000	178400	1000	118691	136646	388499	1.07175e+06	669254	645943	2.87814e+06	189828	2.54071e+06	254611	906686	983680	752995	440609	1.09177e+06	895480	3.0886e+07	1.27354e+06	961510	3.95301e+06	2.60745e+08	3.9621e+07	5.20466e+07	3.34775e+07	4.73052e+06	2.64679e+07	7.68257e+06	207338	63894.9	1.34888e+07
649	1.47714e+06	2.6553e+06	8.29934e+06	253788	1.43044e+06	1.12135e+06	603033	1.75749e+06	2.10754e+06	1.38846e+06	1.17435e+06	126844	270036	622952	1000	1.29448e+06	1000	1000	1000	1000	246395	1.09984e+06	3.66539e+06	771264	968974	5.761e+06	638162	5.00614e+06	343560	1.57082e+06	275792	821773	1.04788e+06	705528	6.49297e+06	3.0886e+07	1.43551e+06	563509	3.59472e+06	3.28472e+08	3.82156e+07	6.26107e+07	3.62397e+07	5.19675e+06	3.5026e+07	7.24698e+06	343676	47603.6	1.67806e+07
648	1.81743e+06	4.36028e+06	1.46006e+07	344897	1.85594e+06	2.14287e+06	437796	2.85524e+06	802640	3.54966e+06	1.717e+06	330936	285577	585348	1000	2.78706e+06	1000	1000	1000	1000	262544	5.77034e+06	1.54505e+07	2.48219e+06	4.72871e+06	2.34425e+07	4.52601e+06	3.7959e+07	1.05961e+06	6.53068e+06	752266	3.19197e+06	336564	2.75914e+06	1.12468e+07	5.81286e+07	2.47377e+06	802768	5.49311e+06	1.97595e+08	5.38761e+07	6.00577e+07	5.26808e+07	8.93116e+06	2.166e+07	1.06269e+07	2.18113e+06	77839.4	1.78152e+07
652	2.80558e+06	7.16848e+06	2.73691e+07	341536	381864	2.3315e+06	254639	2.49549e+06	820394	3.46986e+06	333114	20253.7	361851	603021	1000	2.9066e+06	1.18089e+07	1.76891e+06	1.445e+06	1.24402e+06	517871	606262	2.90845e+06	1.93993e+06	384860	2.66376e+06	757828	7.84033e+06	548241	1.08553e+06	522100	1.44442e+06	17682.9	4.11426e+06	2.1167e+06	8.03517e+07	4.52307e+06	586041	8.90357e+06	5.8772e+08	8.44031e+07	1.26707e+08	8.84019e+07	9.30311e+06	5.81198e+07	1.90949e+06	287760	639055	3.60635e+07
650	935620	300378	1.29613e+07	188185	630784	345517	2.05376e+06	913410	866867	558285	372103	145931	1.20379e+06	383916	1000	558902	517187	529802	1.52273e+06	692253	87845.5	711550	3.16943e+06	72653.6	365323	4.67029e+06	927058	8.74545e+06	194063	1.08144e+06	410180	337830	19404.5	1.10379e+06	5.24321e+06	3.48127e+07	1.60197e+06	601631	3.59678e+06	3.28076e+08	4.35372e+07	2.28892e+06	2.2971e+07	3.16118e+06	3.00614e+07	6.33929e+06	325485	320460	9.98957e+06
653	2.17515e+06	4.66995e+06	1.4238e+07	603218	2.16092e+06	1.92713e+06	427636	3.18713e+06	3.2635e+06	3.30711e+06	375451	94329.7	239841	1.29827e+06	1000	2.52185e+06	8.06603e+06	1.25558e+06	1.89689e+06	993323	721567	9.30789e+06	2.14631e+07	1.79959e+06	8.20469e+06	3.35429e+07	848920	4.85927e+07	2.07389e+06	9.24002e+06	678712	4.00466e+06	1.30662e+06	3.58029e+06	2.32251e+06	8.1863e+07	1.50398e+06	909960	9.01266e+06	4.99291e+08	8.94576e+07	9.89422e+07	5.21471e+07	1.29991e+07	4.98341e+07	2.0335e+06	2.77223e+06	400447	2.36894e+07
687	2.34493e+06	2.23339e+06	3.68955e+06	551489	2.76455e+06	2.29962e+06	491168	4.10284e+06	5.0329e+06	4.4111e+06	521956	240773	1.20774e+06	1.16668e+06	1000	3.05463e+06	1.26303e+07	1.82274e+06	2.04125e+06	948188	660638	4.64103e+06	1.39837e+07	1.50851e+06	3.90847e+06	2.04297e+07	1.07765e+06	2.00862e+07	979779	7.54624e+06	1.646e+06	365466	1.07845e+06	4.02945e+06	1.32494e+07	9.34492e+07	1.2946e+06	443984	8.42759e+06	3.91106e+08	9.90288e+07	1.05547e+08	4.04766e+07	1.40395e+07	3.83471e+07	1.41945e+07	1.76633e+06	1000	1000
654	2.63487e+06	2.41065e+07	6.2203e+07	240702	613856	467337	6.72605e+06	867760	853911	641149	320388	20013.2	309053	277568	6.41229e+06	579191	4.68455e+07	5.26243e+06	5.71535e+06	2.64087e+06	242285	1.50024e+06	3.33497e+06	542076	947887	6.48012e+06	1.45047e+06	1.73254e+07	336957	786084	1.05424e+06	549349	1.92325e+06	837632	922878	1.21019e+07	1.85204e+07	2.92677e+06	5.06905e+06	1.30521e+08	1.80498e+07	2.51876e+07	2.33804e+08	3.14293e+07	1.39607e+07	1.99336e+06	959371	2.86183e+06	9.85968e+07
660	1.54726e+06	3.05315e+06	9.04025e+06	622098	1.61774e+06	1.20968e+06	408883	2.54706e+06	715874	2.68851e+06	310854	337389	313203	1.3156e+06	1000	1.92039e+06	2.96747e+06	652002	1.34693e+06	672033	459759	6.74115e+06	1.78274e+07	1.59248e+06	6.49477e+06	3.00267e+07	844800	4.51015e+07	1.73241e+06	9.03627e+06	617891	4.45053e+06	1.13448e+06	1.31337e+06	5.37474e+06	3.80367e+07	1.24751e+06	584131	4.41452e+06	2.48114e+08	4.75162e+07	4.67146e+07	1.99099e+07	3.67003e+06	2.37529e+07	6.2134e+06	2.60012e+06	1000	9.98957e+06
688	2.11868e+06	4.02458e+06	7.52596e+06	545832	2.94187e+06	2.39384e+06	415018	3.76358e+06	4.54953e+06	3.66784e+06	3.03951e+06	269091	147344	1.05546e+06	1000	2.70333e+06	6.28752e+06	631774	1.22205e+06	845721	625858	1.22075e+07	2.49318e+07	1.96518e+06	1.10472e+07	3.9927e+07	934253	5.19894e+07	2.6232e+06	9.85511e+06	1.23608e+06	264779	1.47372e+06	3.56733e+06	1.08609e+07	7.5012e+07	1.31555e+06	458939	7.7587e+06	3.50654e+08	7.85958e+07	6.71408e+07	3.46414e+07	9.307e+06	3.48633e+07	1.17641e+07	3.2518e+06	560500	1.56242e+07
658	1.73635e+06	2.53027e+06	5.12824e+06	415673	2.42322e+06	2.0973e+06	597611	3.98579e+06	4.27187e+06	3.8332e+06	473738	332389	131029	982491	1000	2.99353e+06	1000	353270	1.2095e+06	482143	339873	1.16605e+07	2.45834e+07	1.88148e+06	1.01474e+07	3.66723e+07	954639	5.36996e+07	2.39252e+06	9.44969e+06	1.3086e+06	287609	1.46081e+06	2.64981e+06	7.13628e+06	3.82382e+07	1.22195e+06	564744	5.40415e+06	1.61566e+08	6.78416e+07	3.91312e+07	1.75185e+07	6.88732e+06	1.54672e+07	8.47246e+06	2.98695e+06	1000	7.44846e+06
708	2.55173e+06	2.21789e+07	6.45739e+07	343337	1.54929e+06	1.04937e+06	325759	2.62726e+06	2.64461e+06	2.47676e+06	272147	38878.1	393577	426752	1000	1.7865e+06	3.0742e+07	1.058e+06	5.75302e+06	1.83013e+06	318331	6.46385e+06	9.08792e+06	3.24267e+06	6.64998e+06	2.26391e+07	6.6513e+06	1.82967e+07	1.73081e+06	1.5275e+06	550361	1.42679e+06	4.24067e+06	1.31312e+06	894596	1.39574e+07	2.15734e+07	4.58058e+06	5.27122e+06	1.42751e+08	1.93403e+07	2.04987e+08	1.97453e+08	1.03923e+07	1.4714e+07	2.34626e+06	3.45505e+06	1.16734e+07	9.00896e+07
671	976191	872411	7.76361e+06	599615	1.20781e+06	1.19702e+06	313333	453755	750501	2.8294e+06	295926	159704	586050	942480	1000	2.02662e+06	9.75784e+06	1.62324e+06	1.91552e+06	1.00273e+06	616560	5.93458e+06	1.59859e+07	1.5369e+06	5.79817e+06	2.66435e+07	7.22484e+06	4.24867e+07	1.57307e+06	7.46321e+06	560330	3.45313e+06	1.1384e+06	4.28242e+06	1.14342e+07	9.40537e+07	1.26841e+06	549940	9.9638e+06	4.99291e+08	9.91363e+07	9.6129e+07	5.43472e+07	1.64176e+07	5.09639e+07	2.01287e+06	3.16502e+06	809721	241884
673	1.25825e+06	1.35557e+06	1.34173e+07	337778	1.093e+06	661476	2.14896e+06	1.47919e+06	1.55671e+06	1.29989e+06	1.03131e+06	66818.2	231115	511678	1000	1.09256e+06	1000	333371	1.32163e+06	607561	256738	818484	3.51427e+06	709711	286692	3.99511e+06	837903	7.17754e+06	210023	1.44424e+06	979262	594199	748299	2.19781e+06	1.41819e+06	4.91192e+07	2.77865e+06	956328	6.21233e+06	4.28735e+08	6.16042e+07	9.31935e+07	4.75554e+07	1.07528e+07	4.34315e+07	8.6956e+06	231747	239807	1.9933e+07
709	1.88814e+06	6.69343e+06	1.11376e+07	652555	728944	3.3726e+06	744871	713231	1.11053e+06	5.18512e+06	578005	330764	205173	1.36877e+06	1000	3.91211e+06	9.11264e+06	1.49926e+06	1.41397e+06	854184	478855	2.72664e+06	1.01327e+07	1.21629e+06	2.28175e+06	1.40038e+07	3.2107e+06	1.46888e+07	464450	6.4988e+06	516151	2.8652e+06	773737	2.47273e+06	9.30026e+06	6.22167e+07	3.8658e+06	802528	7.22936e+06	3.39365e+08	7.92411e+07	8.04729e+07	3.44501e+07	9.76828e+06	3.36393e+07	1.17641e+07	1.00267e+06	1000	1.58452e+07
674	1.50608e+06	1.52597e+06	5.65063e+06	469942	1.92735e+06	1.89424e+06	465459	3.00104e+06	777402	3.23039e+06	368740	365896	235093	882981	1000	2.55174e+06	4.9755e+06	939676	1.5598e+06	756174	394189	5.79657e+06	1.46336e+07	1.35111e+06	4.39169e+06	1.99544e+07	4.20245e+06	3.28376e+07	874519	6.10971e+06	612660	767301	1.01e+06	4.42316e+06	1.02877e+07	7.9445e+07	4.64686e+06	903443	7.82811e+06	3.61002e+08	9.02103e+07	1.04813e+08	35789354	1.18587e+07	3.63698e+07	1.34548e+07	1.36087e+06	1000	1.62871e+07
[truncated: 87 more rows]
[truncated: 144 more columns]

## Sheet: Amniotic fluid, negative mode
samples	Cer-ADS(d18:0/26:0)+HCO2	Cer-ADS(d26:0/20:1)+HCO2	Cer-AP(t14:1/28:0)+HCO2	Cer-AP(t18:0/22:1)+HCO2	Cer-AP(t18:0/26:0)+HCO2	Cer-AP(t20:0/24:0)+HCO2	Cer-AP(t20:1/24:0)+HCO2	Cer-AP(t20:1/26:0)+HCO2	Cer-AP(t22:0/26:1)+HCO2	Cer-AS(d24:1/16:1)+HCO2	Cer-AS(d24:1/18:1)+HCO2	Cer-NDS(d18:0/22:0)+HCO2	Cer-NDS(d18:0/24:0)+HCO2	Cer-NP(t18:0/24:0)+HCO2	Cer-NP(t18:0/24:1)+HCO2	Cer-NP(t18:0/26:1)+HCO2	Cer-NP(t22:0/26:0)+HCO2	Cer-NS(d18:1/16:0)+HCO2	Cer-NS(d18:1/18:0)+HCO2	Cer-NS(d18:1/22:0)+HCO2	Cer-NS(d18:1/24:0)+HCO2	Cer-NS(d18:1/26:0)+HCO2	Cer-NS(d20:1/26:0)+HCO2	CL(14:0_18:0_22:5_22:5)-2H	CL(14:0_18:1_20:3_20:4)-2H	CL(16:0_16:1_18:0_18:1)-2H	CL(16:0_16:1_18:1_18:1)-2H	CL(16:0_16:1_20:4_20:4)-2H	CL(16:0_18:0_20:3_22:5)-2H	CL(16:0_18:0_22:5_22:6)-2H	CL(16:0_18:0_22:6_22:6)-2H	CL(16:0_18:1_18:2_20:2)-2H	CL(16:0_18:1_18:2_20:3)-2H	CL(16:0_18:1_20:3_20:4)-2H	CL(16:0_18:2_20:2_20:2)-2H	CL(16:0_18:3_18:3_20:4)-2H	CL(16:1_18:2_20:4_22:6)-2H	CL(18:0_18:0_18:2_20:2)-2H	CL(18:0_18:0_20:4_22:6)-2H	CL(18:0_18:1_18:1_18:2)-2H	CL(18:1_18:1_20:4_20:4)-2H	CL(18:1_18:2_22:5_22:6)-2H	CL(20:4_22:6_22:6_22:6)-2H	CL(22:5_22:6_22:6_22:6)-2H	DMPE(18:2_18:2)-H	DMPE(18:2_20:2)-H	DMPE(18:2_22:4)-H	DMPE(20:4_20:4)-H	LPC(14:0)+HCO2
[truncated: 180 more rows]
[truncated: 160 more columns]
