# Supplementary figures and images for: COVID-19 Infection during Pregnancy: Disruptions in Lipid Metabolism and Implications for Newborn Health
Source: Preprints.org preprint supplement (doi:10.20944/preprints202307.1683.v1), 2023-07-26

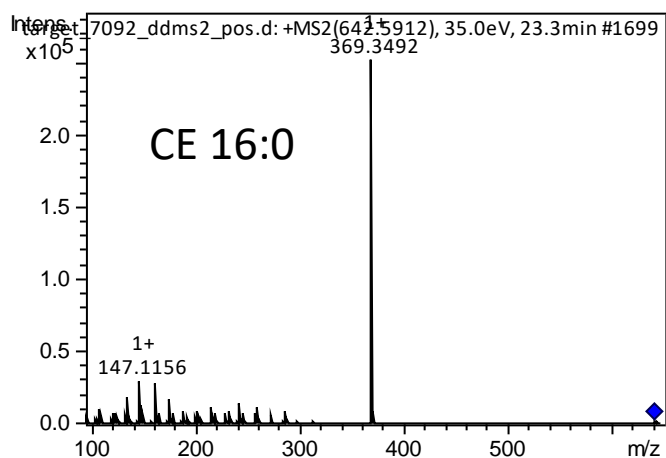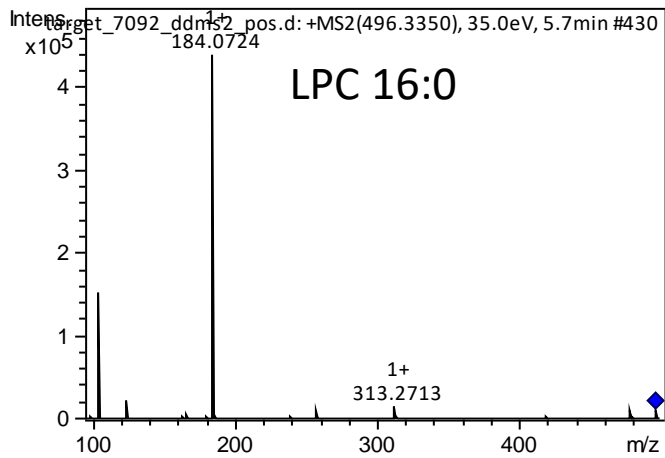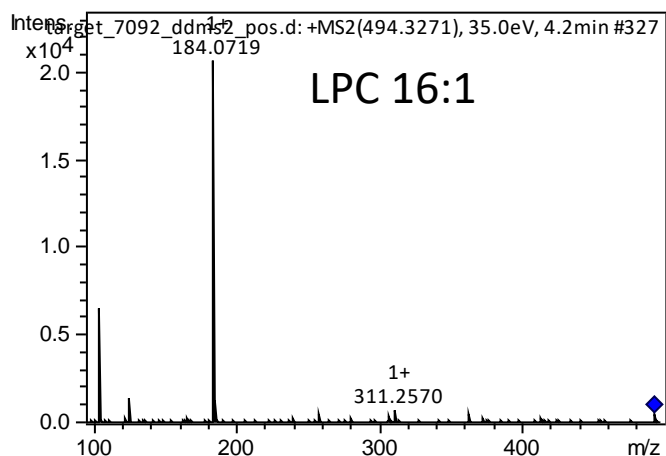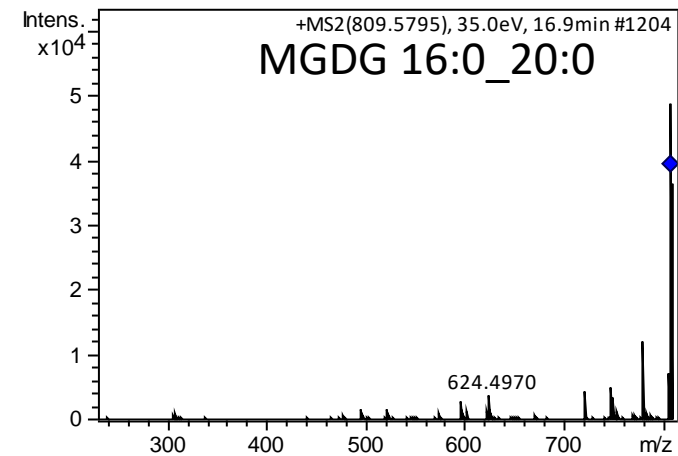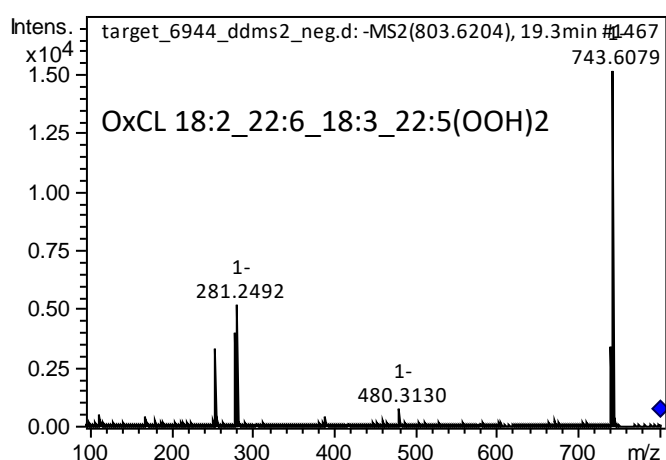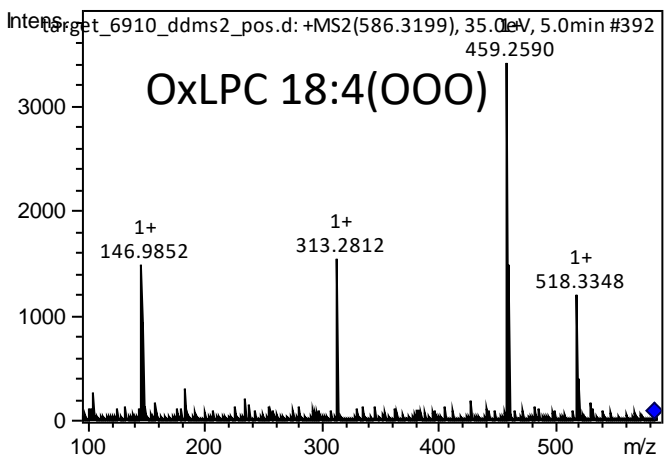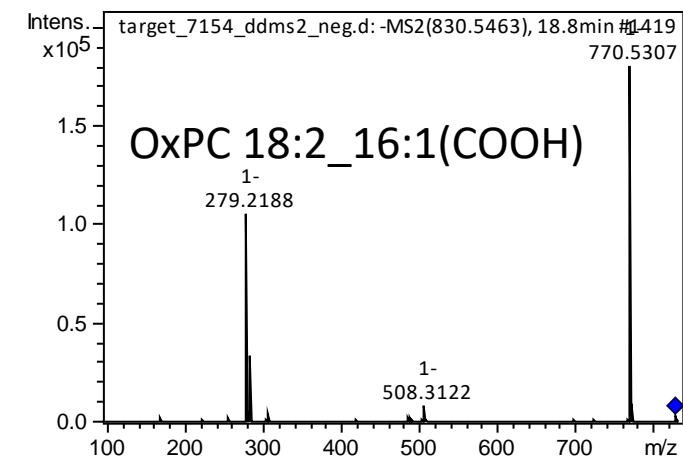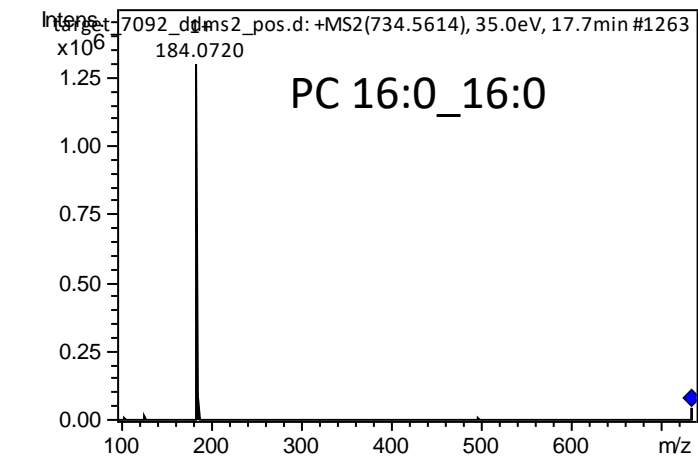

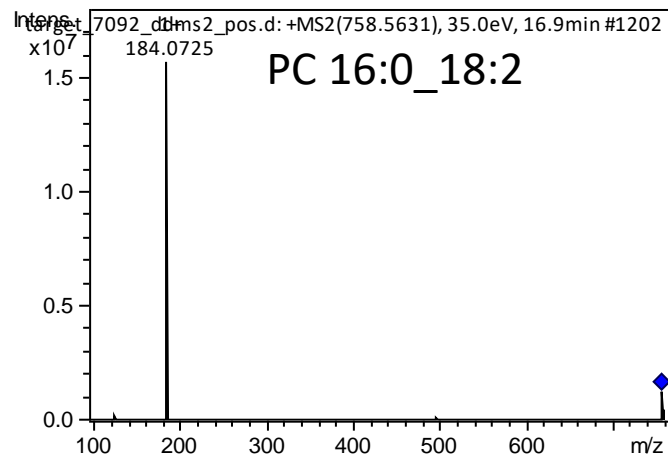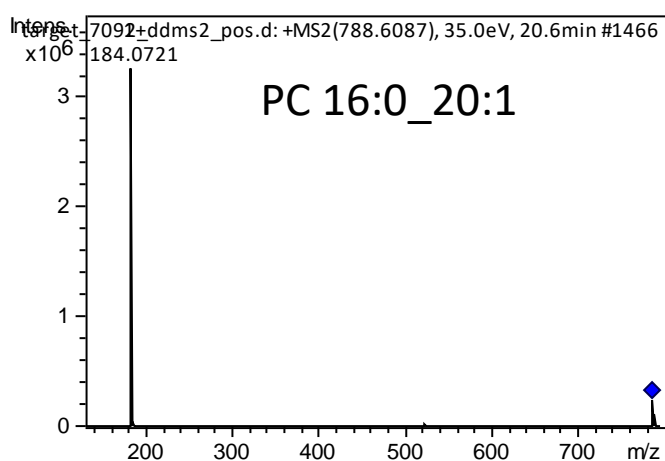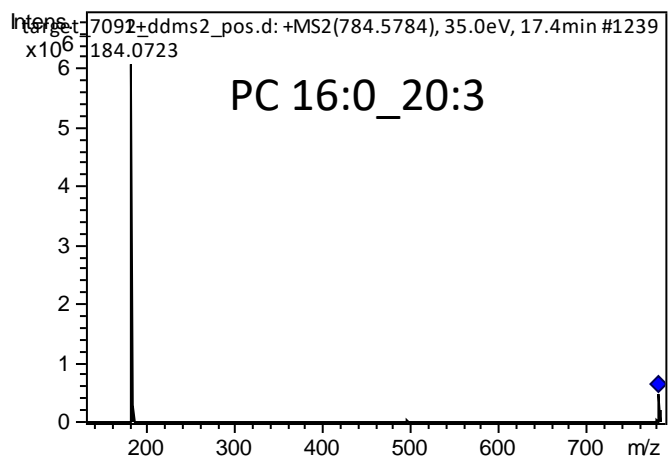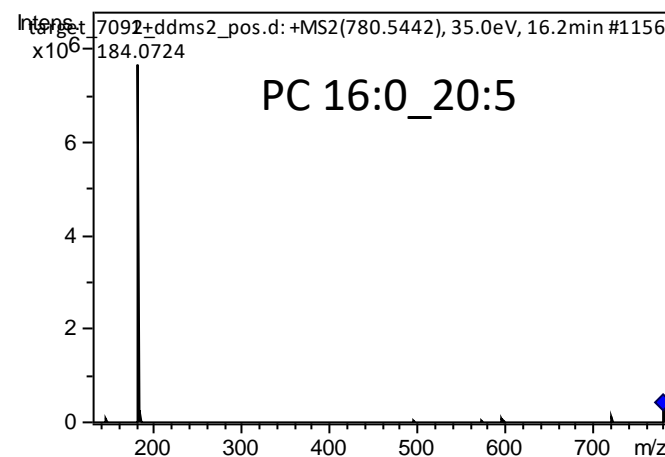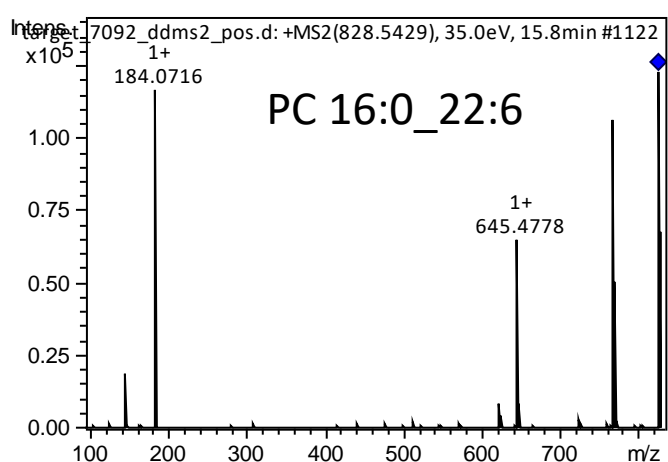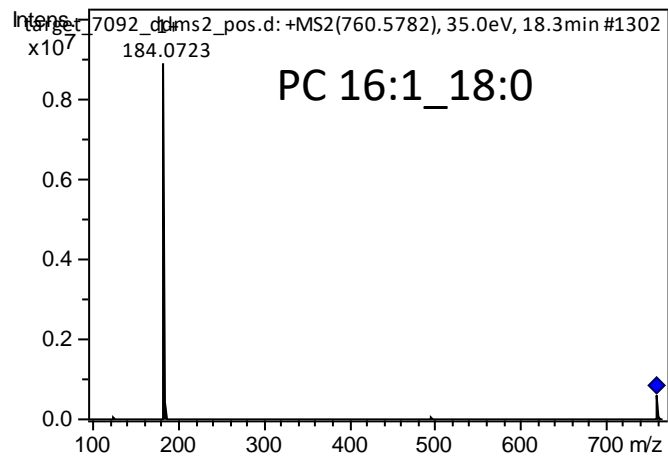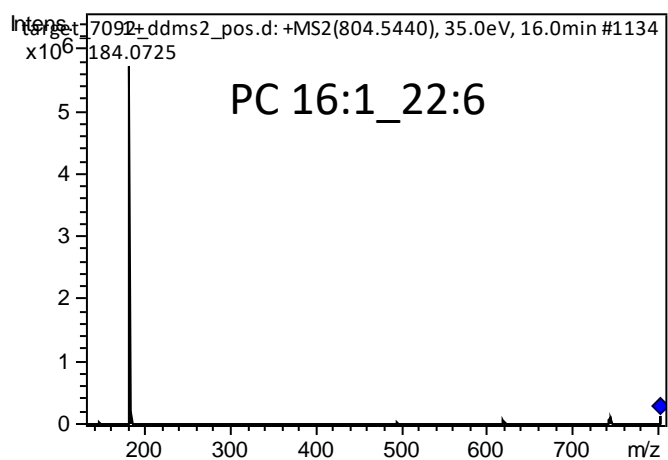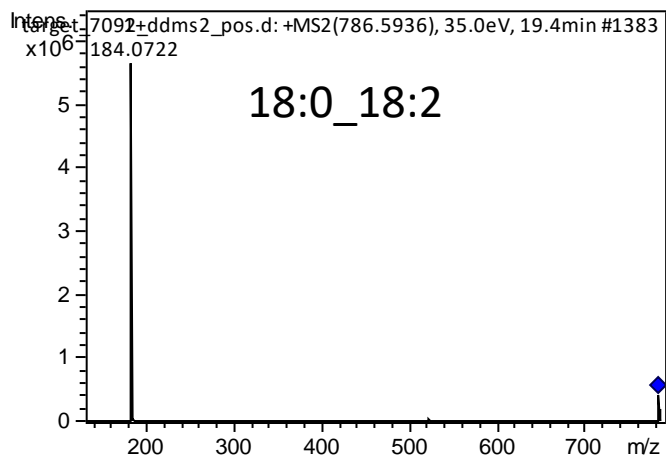

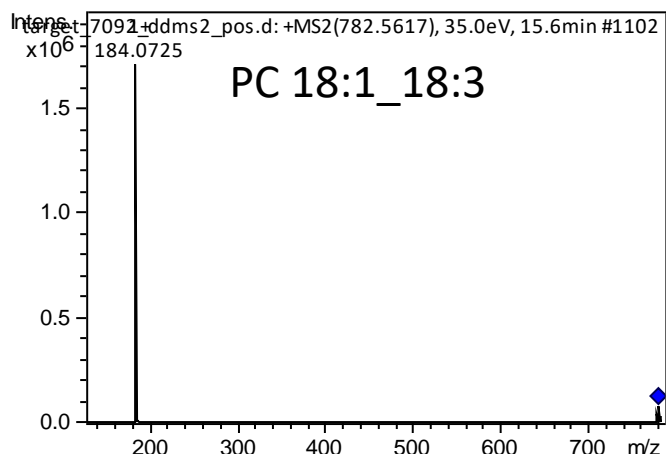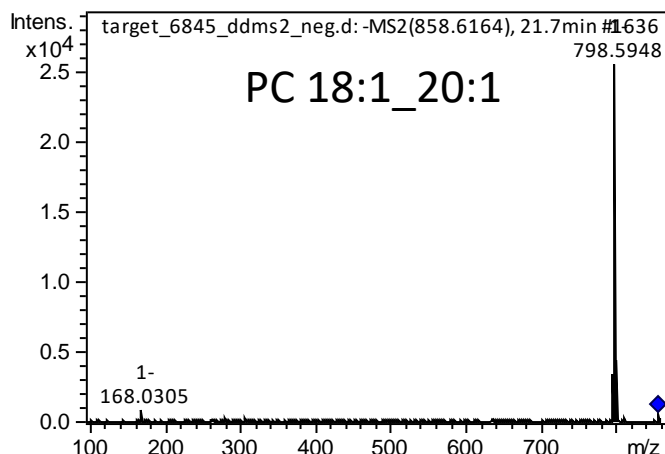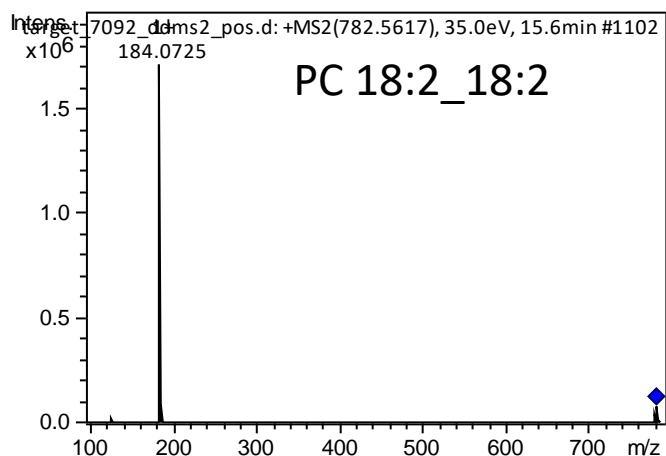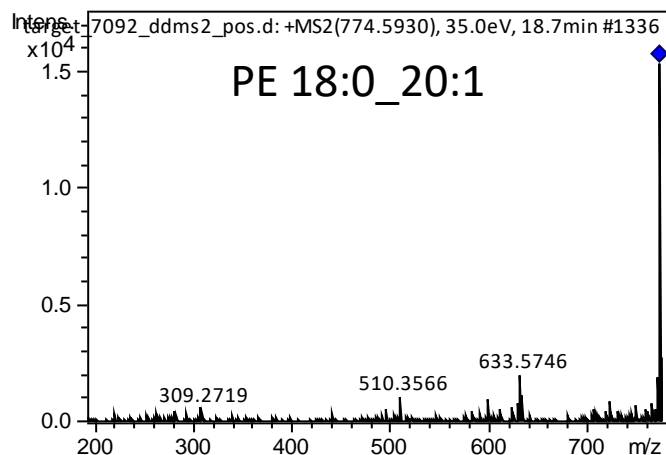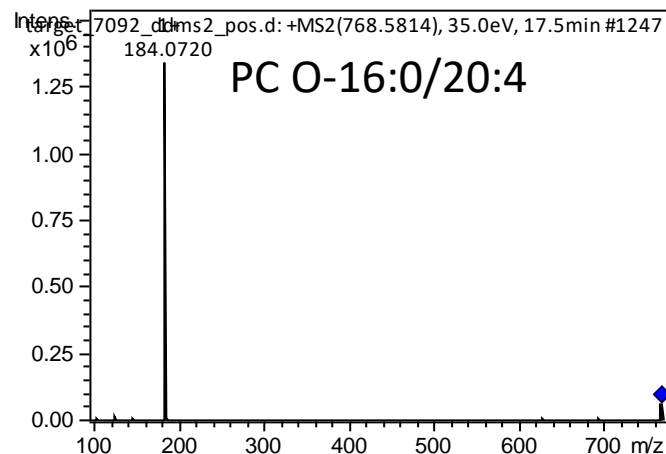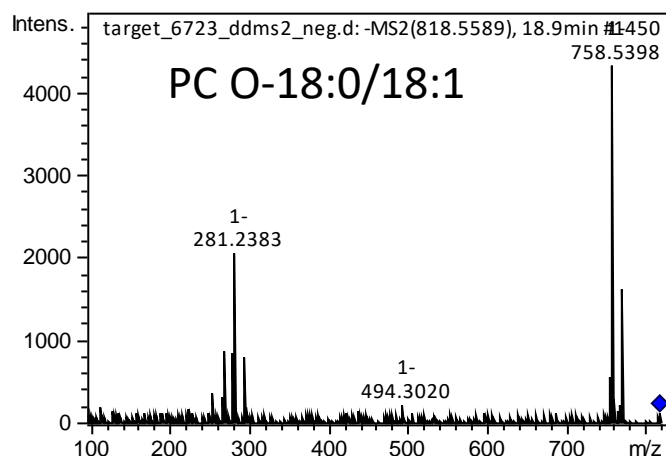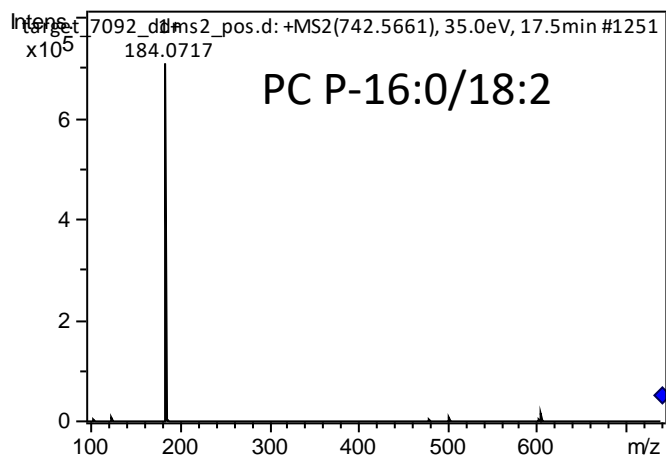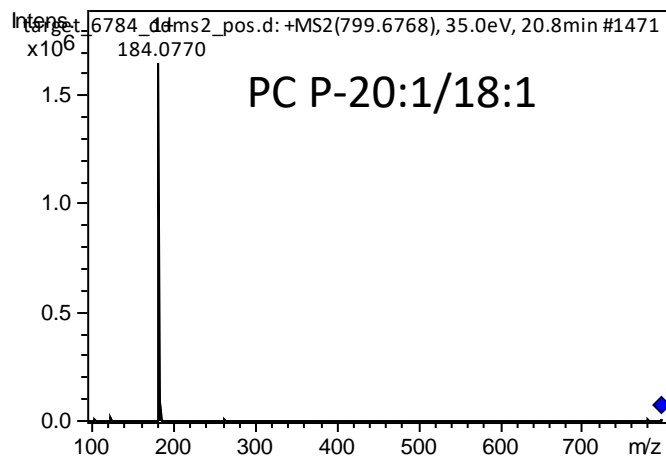

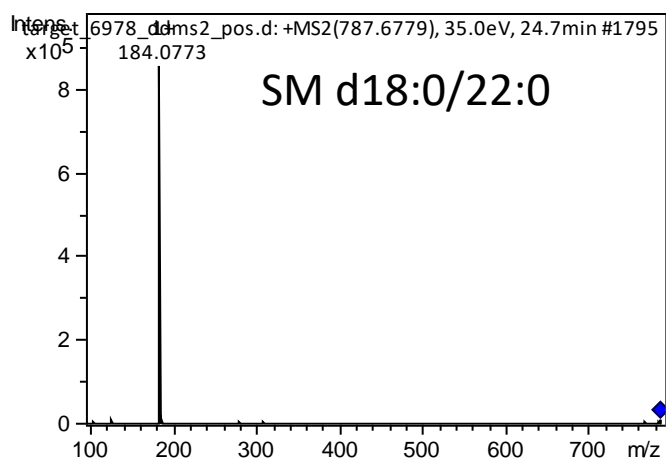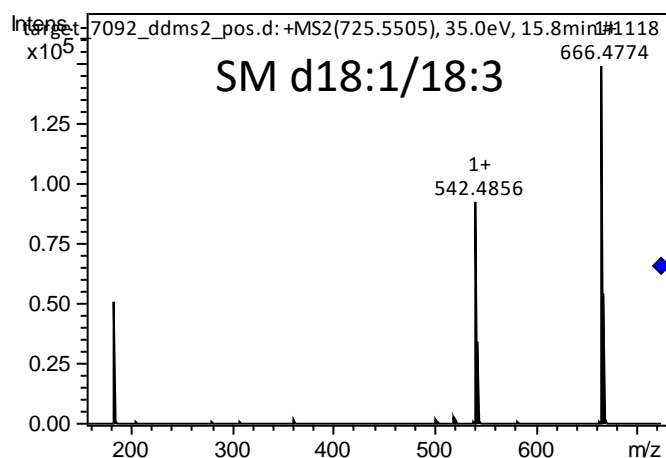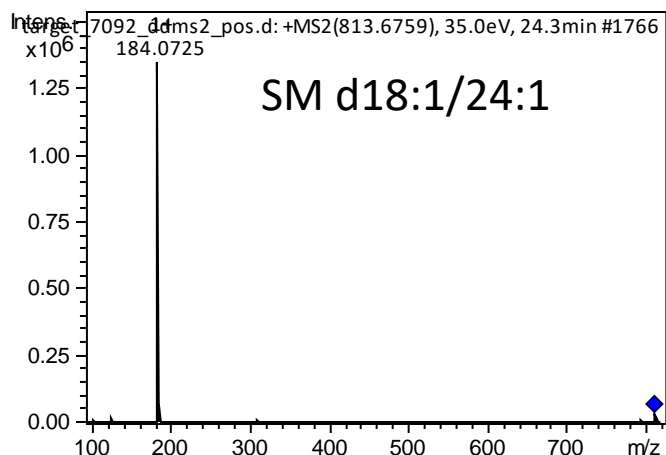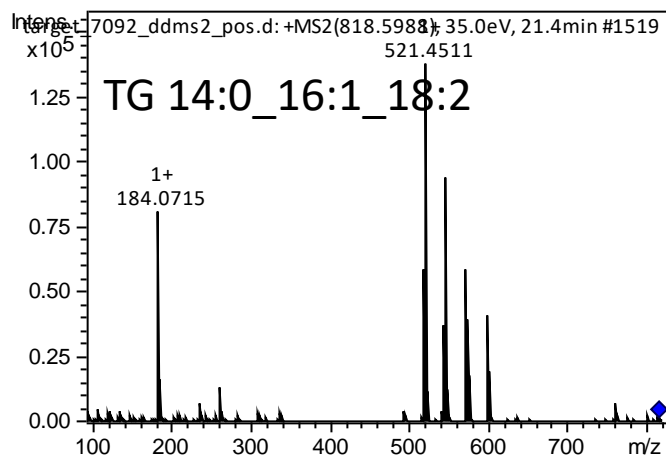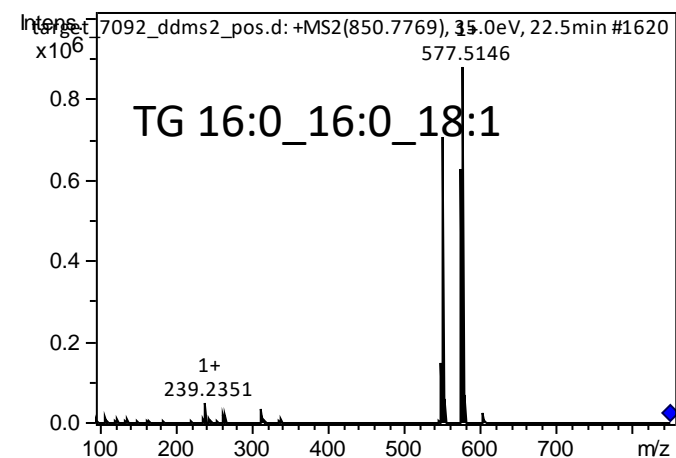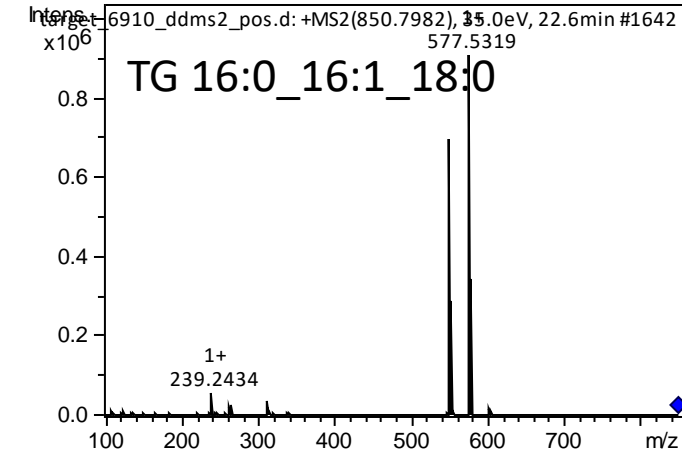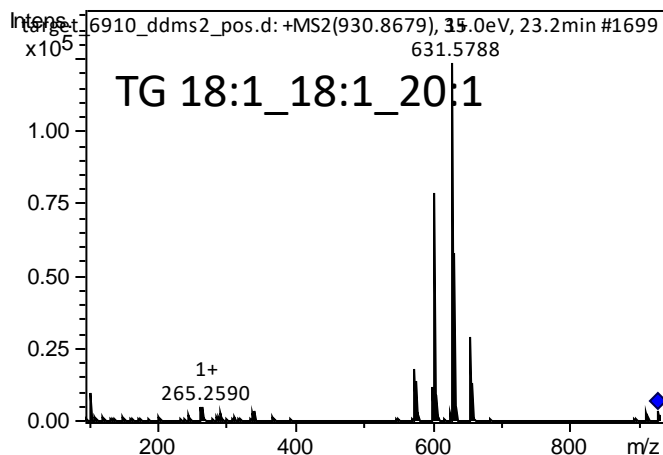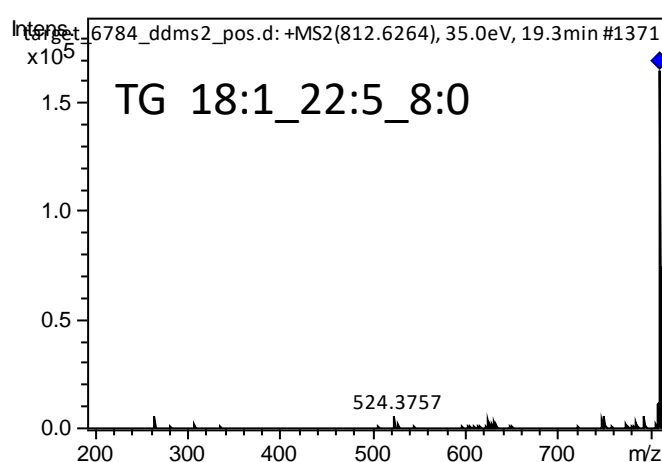

Supplement: Supplementary file 1 [file supplementary]

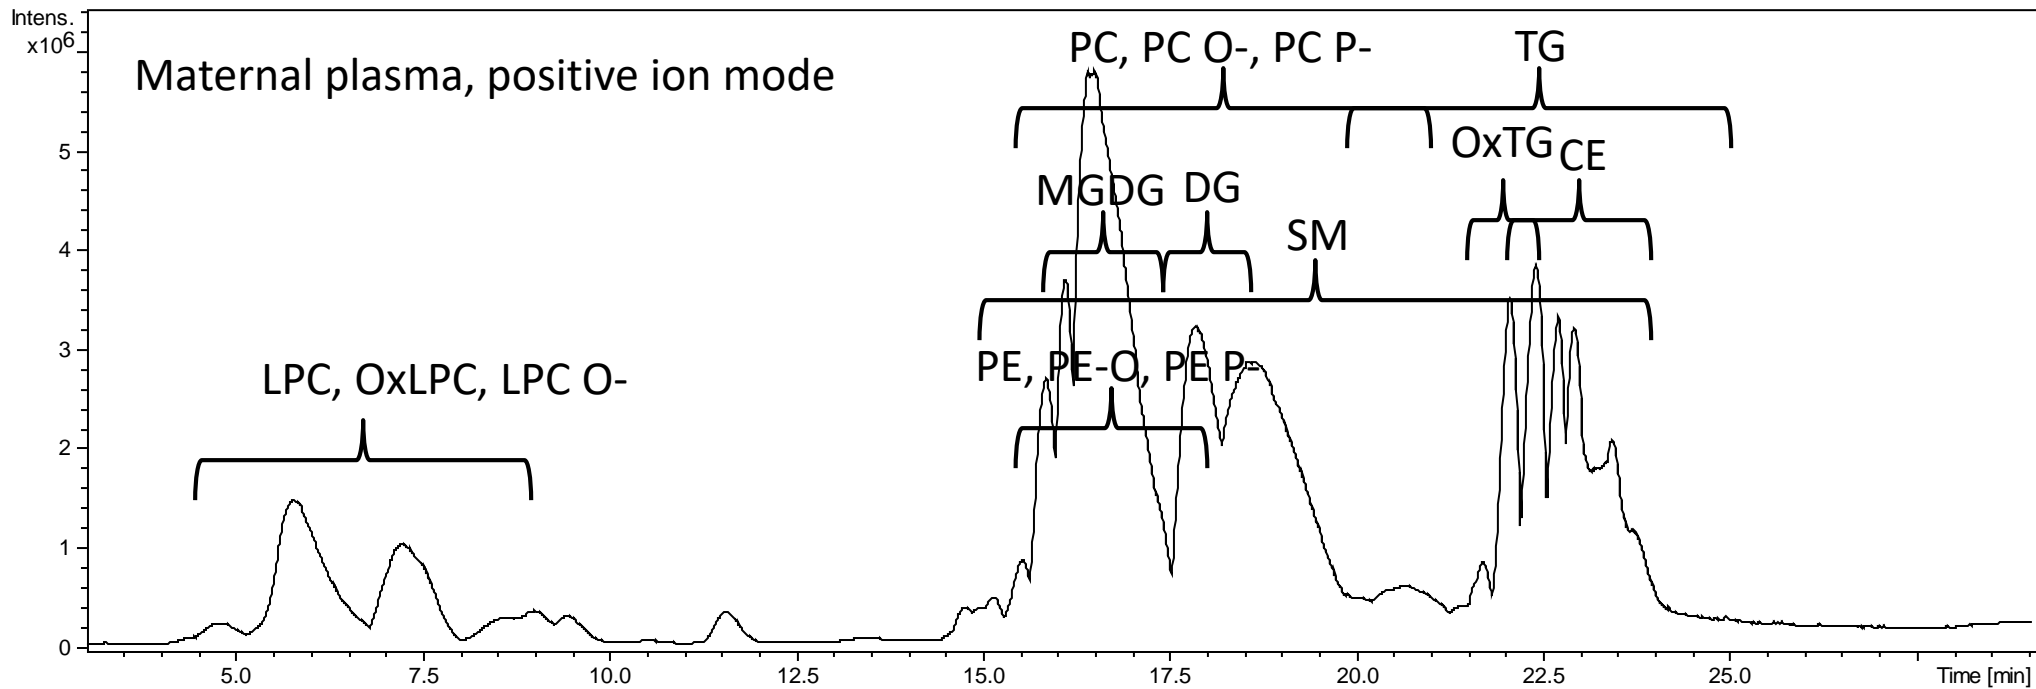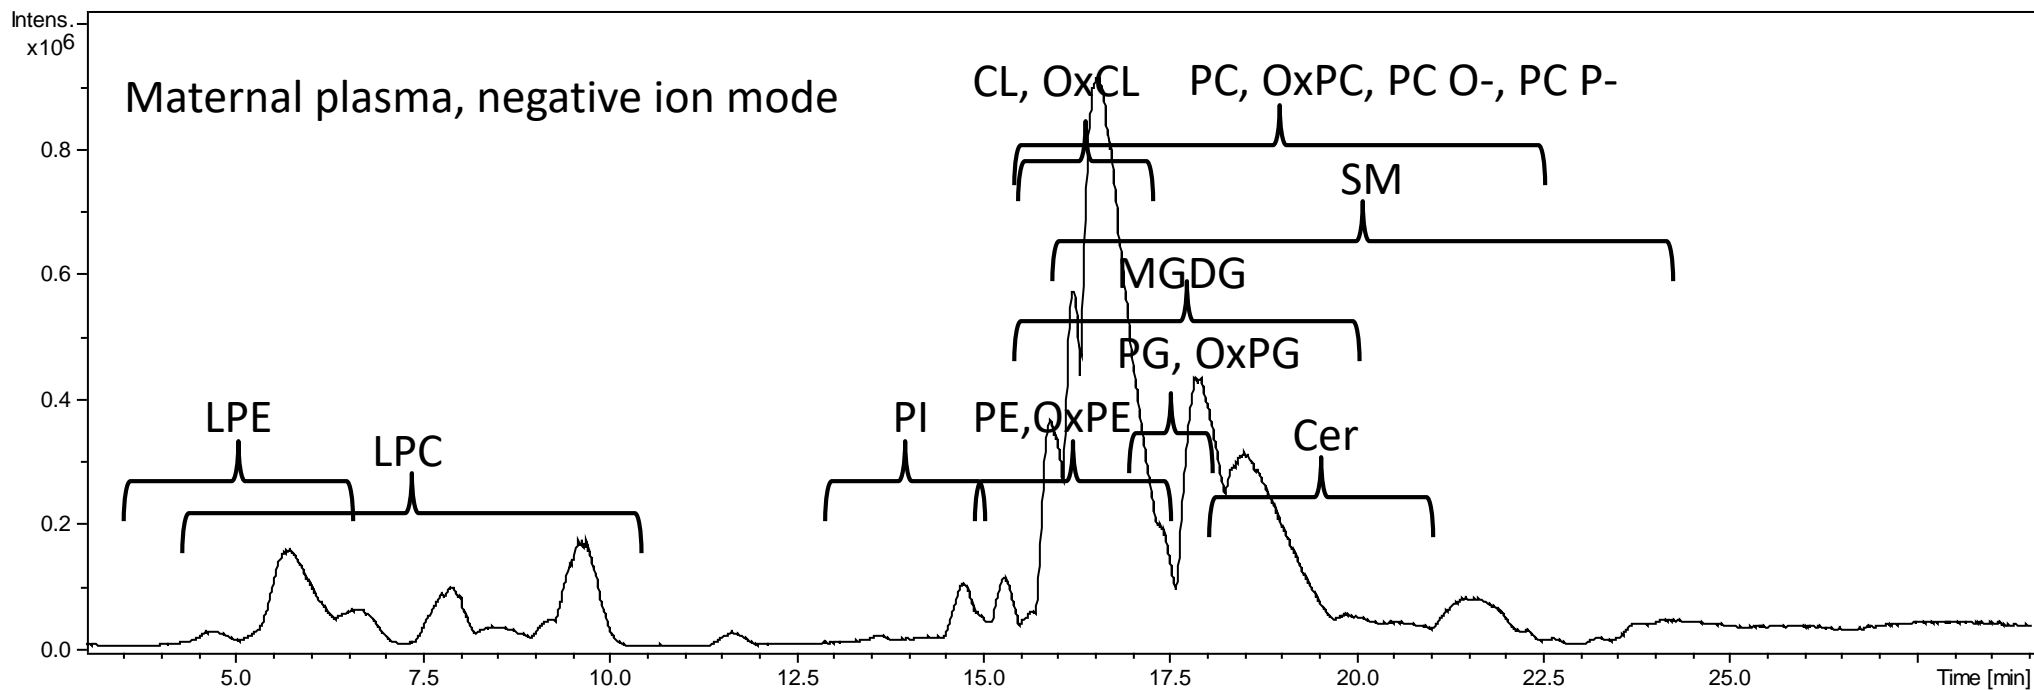

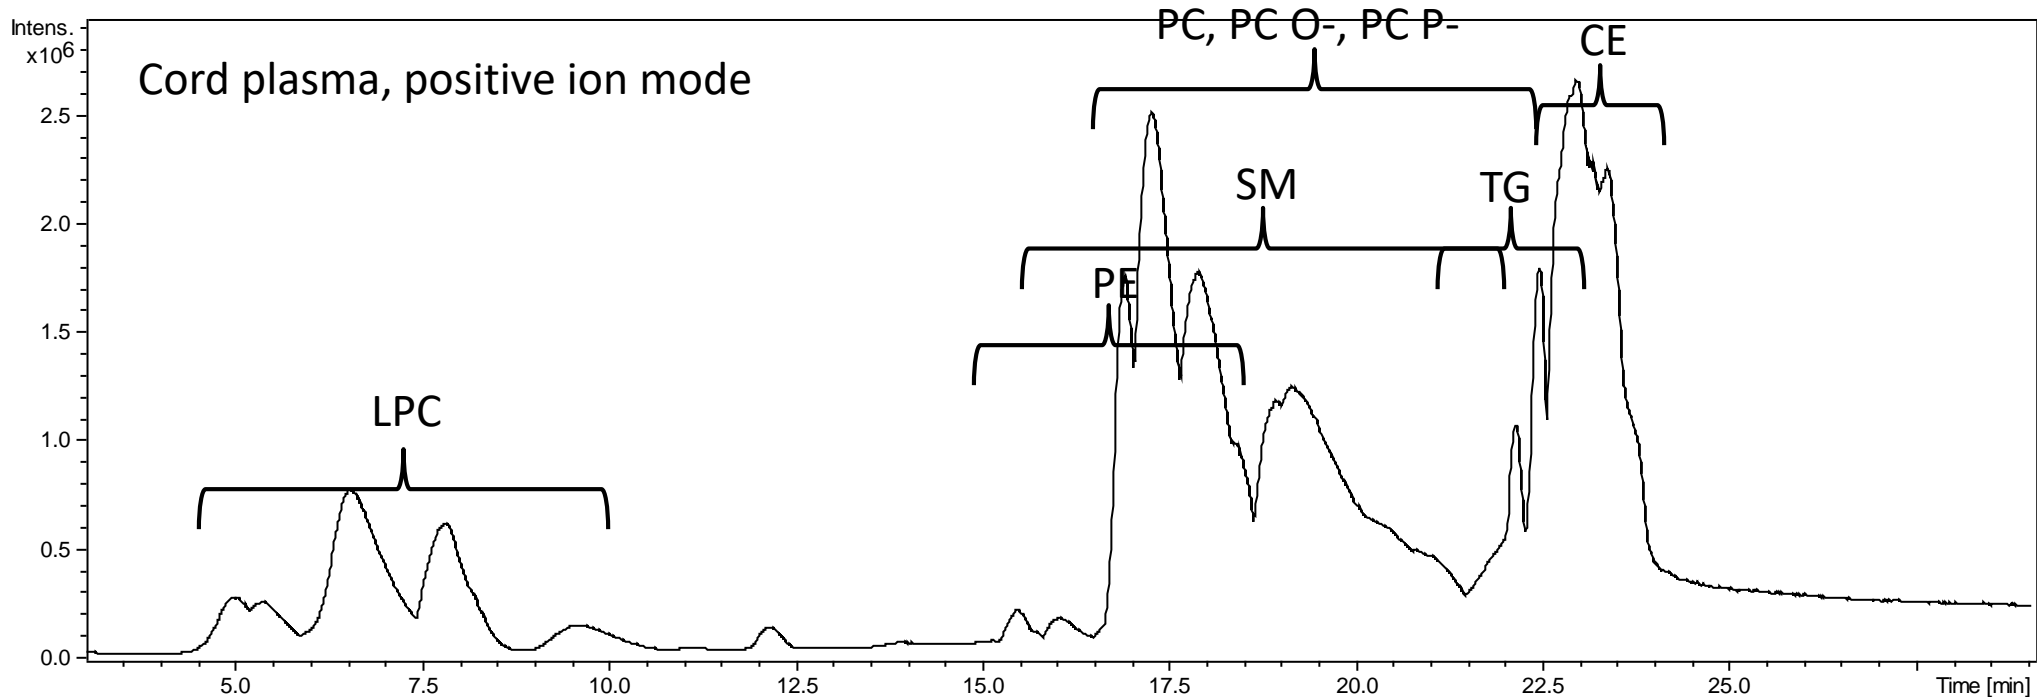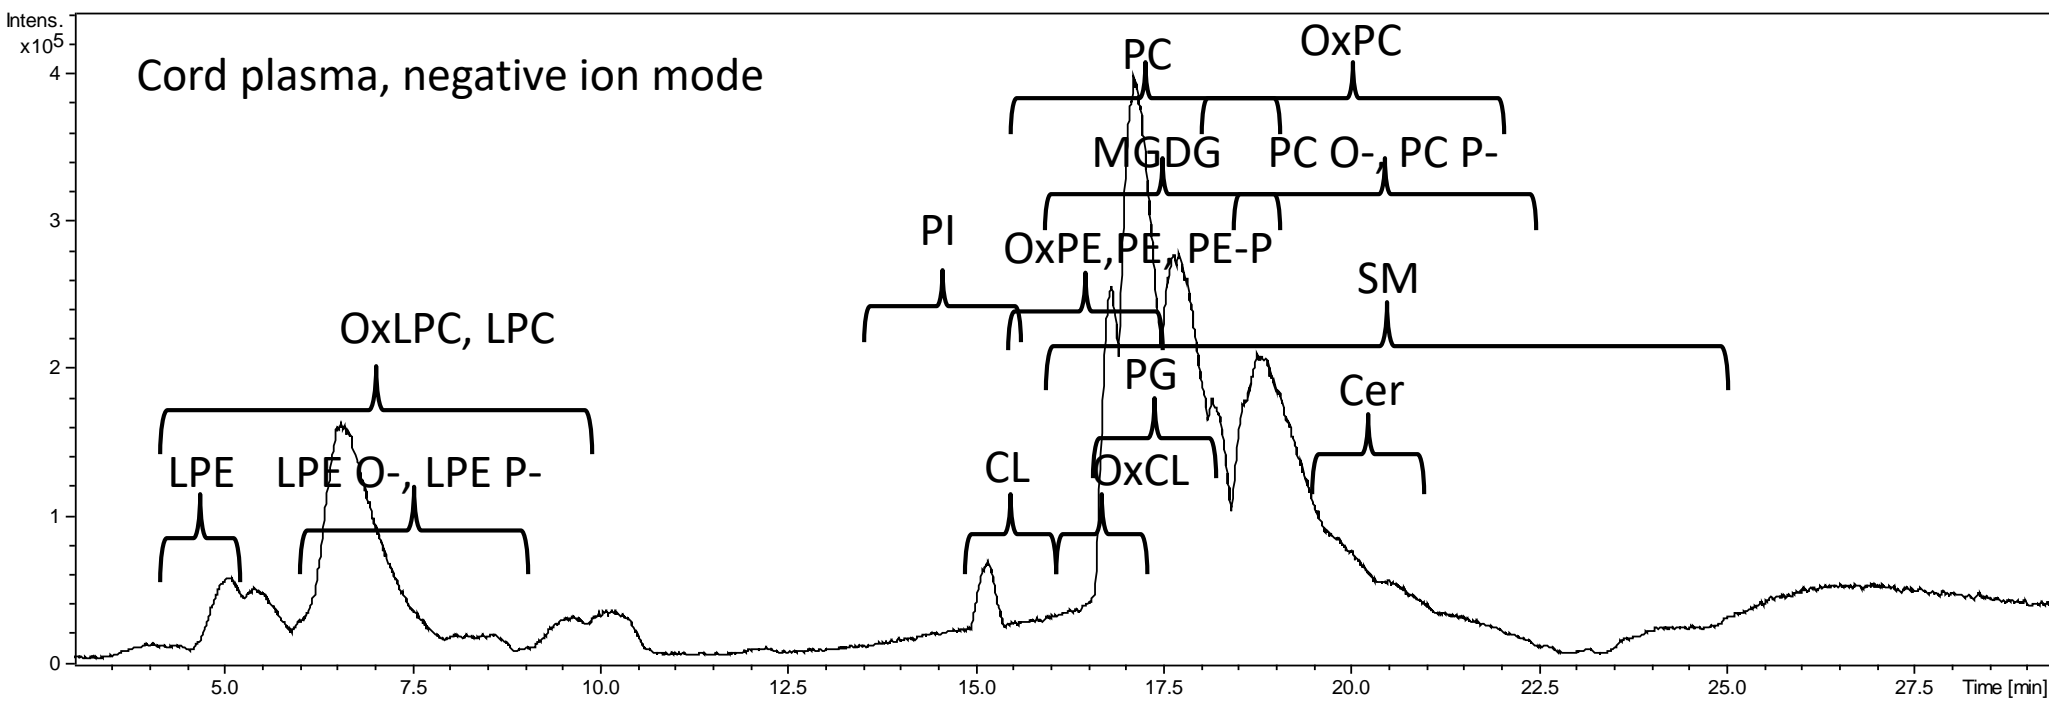

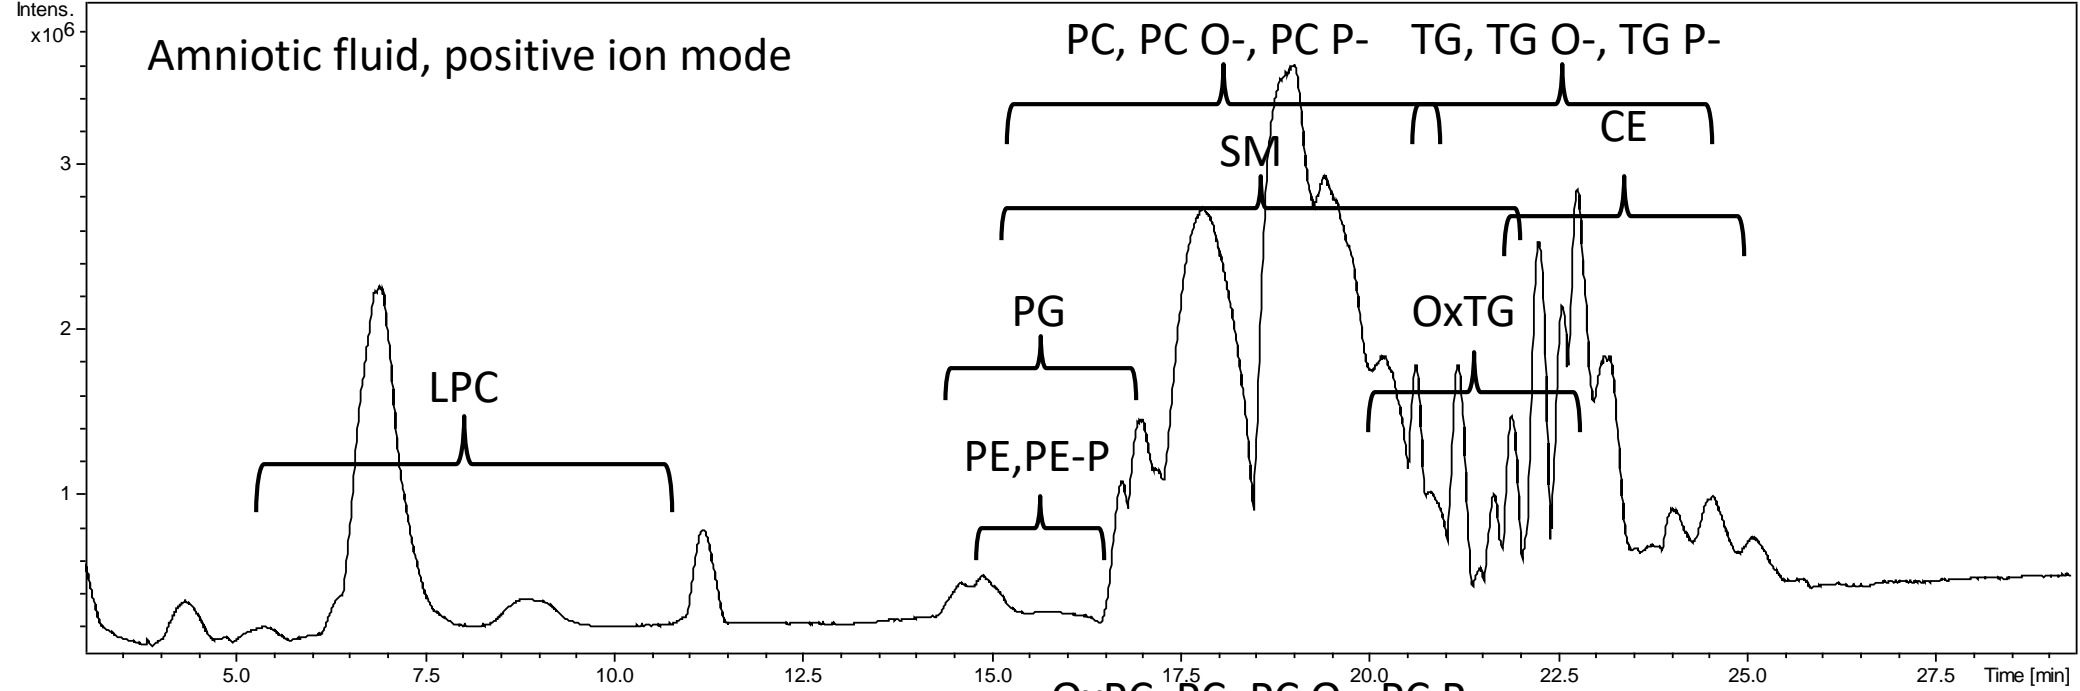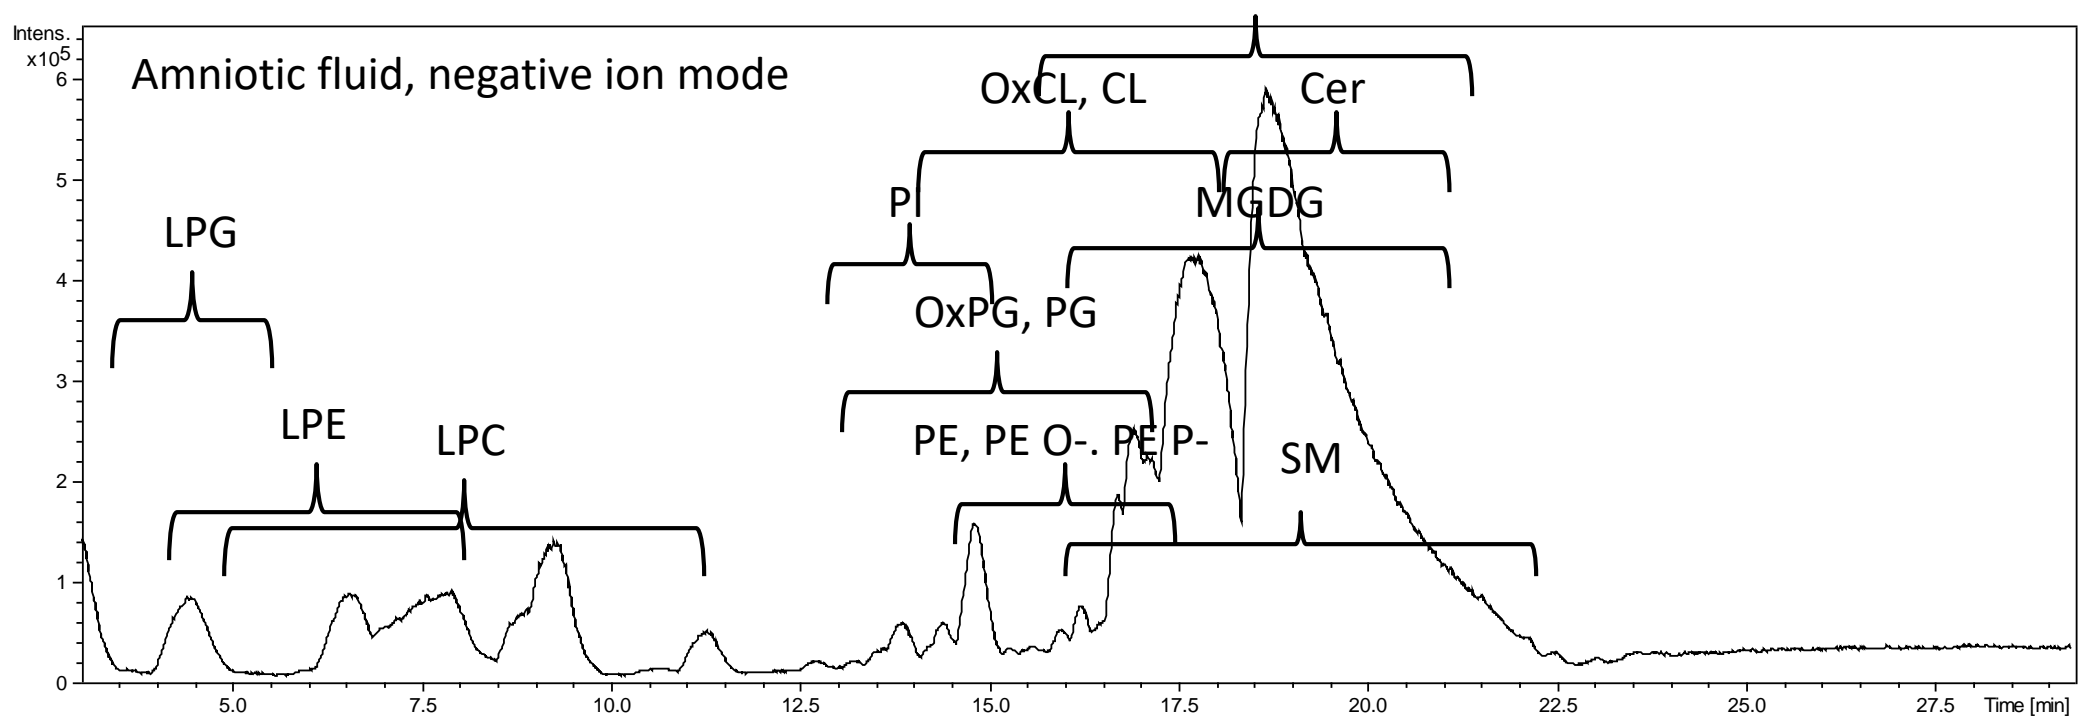

Supplement: Supplementary file 2 [file supplementary]
